# Supplementary material for: The Ndc80 complex bridges two Dam1 complex rings
Source: eLife. 2017 Feb 13;6:e21069. doi: 10.7554/eLife.21069 (PMC5354518; doi:10.7554/eLife.21069)
Supplement: Figure 1—figure supplement 3—source data 1. — DOI: http://dx.doi.org/10.7554/eLife.21069.008 [file elife-21069-fig1-figsupp3-data1.xlsx]

## Sheet: Figure 1 - figure supplement 3C
Table of residence times for Figure 1 - figure supplement 3C
wt Ndc80	wt Ndc80 + Dam1	Ndc80 ins 219	Ndc80 ins 219 + Dam1	Ndc80 ins 652	Ndc80 ins 652 + Dam1
1.6	7	1.1	38	2.3	3.3
0.9	1.7	0.5	77	3.2	2.1
9.2	2.4	0.6	23	4	21.7
0.3	2.2	0.4	70	0.4	9.3
0.5	0.8	2.3	8	2.5	1
0.2	0.9	1.8	17	0.5	22.7
8.4	2.1	9.9	15	5.1	18.5
2.5	1.1	1.5	126	3	0.7
1.4	0.8	5.6	6	1.1	0.8
3.8	0.9	4.8	30	0.4	3.1
0.3	1.1	0.1	111	2.2	1.1
0.7	1.9	1.3	1	1.8	4.4
0.5	2.4	2.2	107	17.1	1.1
0.3	4.1	1.9	45	0.1	2
0.2	1	1	20	12.6	1.5
0.4	1.4	0.7	24	1.2	2.9
0.4	4.5	2.9	229	0.4	0.6
0.2	1.5	1.2	30	0.3	9.8
0.1	2	0.3	9	0.1	15.5
1	0.7	2.8	10	7	22
1.1	0.8	0.4	4	7.7	7.5
0.6	1.3	13.3	10	0.3	4.6
1.2	0.8	0.7	180	7.3	1.8
1.3	0.4	11.6	62	9.9	1.6
1.2	13.9	4.1	13	1.8	7.9
0.4	6.6	6.2	4	6.1	8.3
0.5	5	0.7	59	6.3	7
1.8	3.3	0.7	32	2.3	9.2
2.9	4.8	7.5	6	0.4	6.9
3.1	0.7	1.7	50	0.5	1.9
1.5	0.8	0.8	48	0.9	1.3
0.4	1.4	1.4	230	0.6	5.3
1.6	0.5	0.5	47	3.5	2.6
0.8	0.7	1.8	24	0.9	0.7
0.3	0.9	0.9	31	4.6	10.2
0.5	0.6	2.3	58	0.9	79.3
0.5	0.6	1.2	108	2.5	4.8
24.5	0.3	1.1	12	0.2	1.6
1.3	1.2	2.8	11	0.5	0.6
0.6	0.5	3.6	20	2	4.7
1	2.4	1.1	15	4.5	23.5
2.1	3.8	0.3	11	0.4	0.4
2.6	0.7	20.1	27	3.7	1.9
1.2	2.4	9.1	114	0.8	1.4
0.6	43.1	1.2	82	1.3	3.8
0.9	9.5	2.7	6	4.1	31.7
0.4	33.4	0.2	14	1.6	3.1
0.8	17.5	6	9	3.2	2.9
15.4	0.3	1.9	7	2.5	1.6
1.9	0.6	4.2	168	2.1	8.4
6.3	6.5	9.4	17	0.9	2.8
0.4	0.3	0.3	61	5	0.8
10.4	6.4	0.8	26	0.2	3.3
3	1	3.4	38	5.8	7.8
1.5	2	0.7	28	19.7	8.5
1.4	2.1	0.1	27	7.8	32.9
0.5	21.1	0.4	8	0.4	0.6
0.7	5.1	0.4	10	0.5	2
0.8	1.4	2.3	31	6.1	1.4
1.1	4.1	0.3	35	0.4	27.3
1.1	14	1.6	52	0.5	8.6
1	1.8	0.4	28	0.2	1.8
1.5	1.5	0.3	27	4.3	0.4
0.6	3.7	1.9	8	5.8	4.3
0.5	3.4	0.5	16	9.6	1.3
0.4	0.5	0.3	8	1.4	19.2
0.4	10.6	1.1	9	0.9	4.2
1.8	1	1.2	19	3.5	1.3
0.6	2.4	5.6	19	1.2	61.6
0.3	2.3	0.5	74	0.3	0.5
0.3	1.2	1.2	220	1.1	0.6
4.8	3.3	0.9	226	0.4	0.7
2.3	2.1	1.5	63	5	0.5
3.1	0.2	1.7	16	13.6	5.3
2.5	0.3	6.1	7	0.8	1.3
0.2	3.6	5.1	10	0.4	13.3
0.6	0.9	1	31	4.9	1.1
0.3	9.8	1.4	69	1.2	6.3
0.3	1.5	0.5	43	0.8	3.7
1.8	15.4	7.7	15	1.8	3.4
1.2	11	1	14	1.6	1
0.5	7.5	9.1	21	6.3	4.9
0.8	1.8	3.6	240	4.5	2.9
1.5	5.1	0.9	72	3.6	3.5
6.3	2.9	2.2	7	3.3	1.7
0.4	14.2	1.4	11	1.5	2.9
1.6	3.9	0.9	23	0.3	1.4
0.3	8.1	0.4	68	0.3	3.3
0.9	6.4	0.2	585	26.1	2.8
10.6	2.3	0.5	151	0.5	3.1
5.2	1.3	5	6	0.7	7.1
1.4	3.4	1.3	72	0.3	11.4
0.4	1	2.6	100	13.8	7.3
4.5	3.2	0.7	21	1.2	22.7
1.7	1.1	0.6	27	1.7	3
0.1	0.4	1.4	11	3	2.4
1	8	0.3	11	1.8	6.2
0.9	22.8	2.5	14	0.4	0.9
22.3	1.4	0.6	9	1.5	3.3
2.7	0.7	0.9	3	3.4	35.5
0.7	0.9	1	59	6.2	0.2
2.6	1.7	3.8	93	15.4	0.3
0.2	0.7	0.8	13	0.8	14.4
0.5	2.1	12.6	46	0.6	4
4.9	1.3	27.1	33	0.6	0.5
0.6	7.1	0.5	80	0.5	3.2
5.5	2.6	0.6	21	8.4	1.6
1.2	1.7	0.8	7	2.1	23.9
3.2	8.1	0.5	22	3.8	5.3
1.7	0.9	5.7	176	5.1	1
0.5	16.6	0.2	230	0.4	3.4
0.6	0.3	1	2	0.9	2.7
0.8	1.2	0.6	5	1.1	2.6
11.9	4.5	0.3	8	3.8	29.3
0.4	0.6	0.5	8	0.4	5.2
0.9	2.4	0.8	74	0.8	1.3
0.2	3.7	2.5	209	1.3	0.8
0.8	0.6	0.6	177	0.3	13.1
1	2.1	0.6	591	4.3	28.2
2.1	5.3	1.2	6	1.6	12.7
8	8.7	0.8	21	3.1	6.4
0.9	2.7	3.4	15	5.3	4.3
0.6	1.4	2.5	28	1.2	0.8
1.4	1.4	4	100	1	3
10.3	3	3.4	25	4.4	3.8
1.7	0.4	3.3	10	3.9	15.1
4.5	3.7	3.8	4	5.4	1
0.6	0.9	4.5	8	0.5	4
6.9	0.2	0.7	36	9.3	1.6
1.7	2.3	2.1	11	0.1	0.3
0.6	0.4	4.2	31	0.2	9.8
0.4	1.2	6	7	0.6	1.7
0.6	1.2	0.7	13	0.5	0.6
1.5	0.3	1.8	11	0.2	2.7
1.1	0.3	0.5	14	1.2	0.6
4.6	0.3	0.8	16	3.4	1.4
0.3	0.5	3.2	85	1.1	3.6
2	1.4	0.6	42	1.2	0.9
0.4	1.5	0.3	53	0.3	0.4
0.7	0.4	0.2	14	1	0.8
0.4	0.3	1.8	112	6.4	8.6
7.4	0.4	1.6	30	5.5	4.8
5.6	0.3	0.8	6	0.6	3.2
0.4	5	0.9	17	5	2
0.9	2.1	5	13	4.1	0.1
0.3	0.2	4.2	46	14	3.7
1	3.8	0.8	48	2.2	1.9
0.4	1.2	0.6	6	23.6	4.2
0.5	2.8	0.5	6	1.9	1.6
1.3	0.4	0.4	164	0.6	4.4
1.2	0.4	1	37	0.3	26.7
0.3	0.7	11.1	4	0.4	0.5
3.3	0.6	1.3	231	0.3	0.4
2	2.6	25.1	40	1.3	4.1
2.1	2	0.4	19	15.3	14.3
3	0.3	0.2	103	2.2	7.6
0.1	2.2	0.5	47	7.8	6.9
0.5	1.2	3.5	34	0.3	4.9
1.1	3.3	4.4	61	6.2	0.3
0.5	2.2	0.4	145	3.6	3.2
0.7	0.2	6.4	13	1.6	6.1
0.3	5.5	5.1	7	0.8	1.3
1.2	0.5	0.6	66	0.7	1.5
1.1	0.3	7.8	11	0.8	0.9
0.9	0.9	2.9	44	0.8	0.8
0.5	2.5	4.1	13	0.3	4.5
1.5	2.6	2.8	117	19.5	0.6
0.5	2	5	25	0.4	0.8
0.1	1	0.5	49	4.1	0.8
0.1	2.6	0.5	27	0.4	1.3
0.4	0.6	0.7	41	1.9	0.4
3.4	2.1	2.6	11	0.6	2.6
0.1	0.5	3.4	20	3.7	25.3
0.7	7.3	0.2	76	8.7	16.6
3.4	0.7	0.2	33	0.6	1.4
2.3	1.9	2.3	54	0.6	1.7
1.3	0.6	1	25	4	1
0.6	5.9	0.9	5	3.7	8.6
0.3	3.2	9.5	28	0.4	2.4
0.6	1.5	0.5	14	3.6	6.9
0.7	0.7	0.4	3	2.7	1.1
0.2	1.1	3.9	18	0.4	2.3
0.7	5.3	1.8	4	1.3	1.4
3.9	0.9	1.9	47	0.2	5
0.3	0.5	0.6	2	1.3	11.5
0.1	0.9	0.4	27	6.4	6.9
0.5	2.8	1.7	23	2.6	6.4
1.3	0.9	3.4	31	4	7.9
0.3	0.9	2.6	3	3.3	1.6
0.9	2	0.6	10	0.7	1.7
0.3	3.4	0.7	67	1.2	7.1
1.3	0.7	1.8	54	1.2	15.5
0.3	1.3	0.4	4	0.3	0.8
0.6	8	0.1	20	0.7	0.6
0.4	5.8	0.6	13	0.3	0.9
9.7	2.4	2.6	18	4	4.8
0.8	1.2	0.4	8	6.2	10.9
0.5	2.1	0.4	10	4.2	1.6
0.8	4.2	0.6	2	3.4	4.6
0.4	2.5	1.2	15	0.5	1.6
0.7	2.2	0.9	35	60.7	2.2
0.4	4.4	2	16	1.7	1
0.8	2	0.4	20	1.1	13
1	3.3	0.2	10	2.6	1
1.2	10.2	0.4	16	0.4	9.2
0.7	7.5	2.1	7	0.4	7.2
0.4	1.1	1.6	7	0.4	7.1
0.8	1.3	0.8	6	0.3	9.2
0.6	2.6	0.2	3	2.2	1.2
0.5	3.5	3.5	6	1.9	6.9
2.5	2.4	1	6	2.2	4.1
5.5	4.2	0.3	15	0.9	18.7
5.9	35.8	1.7	11	6.1	6.6
1.7	1.1	0.9	132	1.8	10.2
0.6	2.6	1	18	1.3	14.8
0.1	1.4	7.3	7	1	28.3
0.2	2.6	0.3	4	2.4	6
0.4	7.8	0.5	6	1.6	2.2
14.1	6.5	0.2	2	1.9	9.8
4.1	1.7	0.8	105	4.7	2.6
1.9	1.3	0.4	25	1.2	3
2.2	6.7	3.4	58	0.7	44.9
1.1	2	0.3	3	17.3	12.9
0.7	6.6	0.1	5	0.8	1.2
1.2	5.5	0.3	5	0.3	0.5
0.1	17.6	0.4	13	22.6	5.7
0.1	1.2	0.2	17	8.9	1.8
0.7	0.1	25.5	34	0.2	2
0.3	3	14.7	10	0.5	30
1.6	2.6	3.1	9	2.2	2
0.5	0.7	0.4	7	2.2	1.8
0.5	1.1	1.9	23	12.4	23.7
0.6	1.7	4	28	2.3	1.6
0.4	3.9	1	22	5.1	0.7
22.2	37.6	2.2	34	7.4	35.2
1	7.4	0.8	23	4.6	10
0.7	10.9	0.4	6	4.6	0.9
0.5	4.1	3.9	4	0.5	3.7
0.5	7.8	1.1	10	2.1	16.9
1.5	17.1	0.5	23	2.2	1.6
0.8	33.8	0.3	248	0.9	1.5
0.5	4.3	1.6	5	1.1	10.4
0.1	1.4	1.4	24	3.4	60.9
4.8	0.7	5.9	33	1	14.7
0.2	5.7	0.8	9	1.1	0.7
0.2	3.7	0.4	9	0.2	10.6
3.6	8.6	2.8	10	0.4	0.2
0.4	8.8	0.2	11	1.2	9.6
0.9	8.6	3.4	33	0.4	3.2
2.9	2.8	0.3	76	0.1	0.9
1.1	5.9	0.8	12	0.6	0.1
0.1	1.2	1.1	175	5.7	27.7
0.5	0.7	3.9	6	6	1.4
0.4	2.4	0.9	285	0.5	2.8
0.6	3	1.1	7	1.3	9.4
2.2	1	1.6	5	0.4	7.2
0.8	1.5	1.3	9	12.8	11.3
0.1	9.3	3.9	11	0.7	0.9
0.2	18.1	1	16	0.3	2.2
0.1	4.6	1.7	8	0.1	0.8
1.8	1.8	0.7	16	4.9	7.1
0.9	8.7	7.7	8	1	1
0.6	2.1	3.3	8	0.5	0.2
5.4	3.5	0.9	64	1.1	2.2
1.4	6.1	3.1	34	2.2	1
0.7	2.5	0.5	9	0.4	1.2
1.8	2.6	10.5	31	0.2	0.5
3	1	0.8	50	0.4	1.3
1	0.7	1.6	27	0.4	1.2
5.9	0.5	1.5	9	0.3	1.6
1.4	2.1	1	24	1.1	4.9
2.6	0.5	0.1	84	0.7	3.9
11.6	6.1	2.5	11	1.7	1
1.5	1.4	1.4	41	0.3	3.5
2	0.7	0.5	36	7.9	1.5
7.5	0.5	1.2	8	0.4	1
0.7	0.3	0.7	3	3	5.4
1	10.4	0.7	20	0.5	0.3
3.5	1.1	1.8	19	0.2	0.5
0.4	3.3	0.3	13	1	1.2
4.8	4	1.1	28	2	3.5
0.6	1.4	0.3	7	7.4	31.5
0.8	2.3	0.1	14	7.9	4
2	0.6	0.1	2	1	5.9
6.6	0.5	2.2	19	3.4	1.2
1.4	0.5	2.5	5	0.5	3
1.3	0.1	8	3	0.5	2.8
1.2	0.4	25.8	8	1.4	0.5
1.6	0.6	1.1	11	0.6	0.5
2.1	9.5	0.1	8	1.1	1.2
0.6	1.5	0.5	6	2.8	1.6
0.8	5.4	1.3	5	3	3.2
1.1	2.3	8.8	10	1.1	6.6
8	5.5	0.7	35	0.4	1.1
2.3	18.9	4.4	8	0.4	2
1.9	9.7	0.8	49	1.1	0.2
0.4	11.9	2.4	9	2.2	7.5
11.2	11.4	0.1	6	0.4	0.9
0.5	0.8	1	12	0.3	1.2
2.1	1.5	8	12	7.2	1
0.6	1.2	8.3	20	0.9	0.3
14.7	1	0.5	11	4.5	1.1
6	2.6	0.7	5	1.5	4
0.6	1	0.7	8	1	2
1.6	0.8	0.9	7	0.3	0.8
0.5	16.2	1.2	51	1.1	1
0.8	1.5	2.7	11	1.5	8.4
1.2	4.2	4.8	5	1.8	3.2
1.2	1	1.5	18	1.5	0.5
5.4	2.2	0.7	5	0.4	13.5
0.5	9.2	17	20	0.1	0.8
1	2	2.6	8	5.3	1.4
0.5	5	16.9	19	1.3	0.5
0.6	3.5	1.5	22	0.5	7.3
0.6	5.2	1.5	72	1.2	0.6
3.9	2.5	0.3	11	1.9	2.4
2.7	3	13.8	43	7.6	2.2
1	0.7	1	36	0.4	1.6
0.6	1.7	0.7	17	3	0.5
13.8	40.7	0.6	14	8.7	5.3
2	0.8	0.6	34	9.5	11
1.6	0.9	0.6	34	0.5	1.1
1.9	0.9	0.5	22	8.7	0.6
0.9	1.6	0.8	69	1.8	0.8
1	1.2	2.1	138	0.2	10.6
1.6	2.3	0.4	48	5.2	0.8
0.5	1.7	1.1	52	0.6	7.2
0.5	3.9	0.8	9	0.9	6.7
6.4	27.5	13.1	4	0.5	0.7
5.1	1.3	7.4	4	0.2	0.8
1.8	0.6	5.7	2	0.4	5.5
0.6	2	0.6	5	0.4	6.7
0.9	1.2	2.6	78	1.1	2.1
0.4	19.5	11	14	0.7	0.8
0.8	1.5	2	38	1.2	4.8
1	3.1	2.1	88	2	0.7
0.8	0.8	0.8	320	5.6	59.7
1.3	0.6	0.7	69	9.9	5
1.8	13.9	35.5	37	0.3	0.8
16.9	0.8	8.7	64	0.3	0.4
0.9	0.3	0.3	64	0.8	7.2
2.4	0.6	0.5	148	0.7	5
0.3	0.4	0.4	7	4.7	2.3
1.3	3.5	0.6	25	1.6	2.1
1.6	5.3	1	235	0.6	10.2
1	1.6	0.9	30	1.1	15.1
3.7	2.9	0.4	142	8.7	3.4
0.3	2.2	1.4	138	7.5	3.2
0.6	1.5	2	34	0.4	6.3
4.6	4.9	0.7	13	0.4	0.6
1.5	0.7	1	111	0.1	1.4
2.5	3.4	0.5	14	2.8	2.4
1.9	1.6	0.3	6	1.5	0.6
1.7	15.9	0.8	20	2.1	2.9
2.1	2	1.4	40	2	0.3
1.4	1	0.4	13	1.4	1.3
1.5	5	0.5	50	0.8	1.1
0.4	14.7	0.2	17	7.1	0.3
0.6	0.7	2.4	21	0.8	4.2
12	0.7	0.4	3	0.4	0.6
2.3	11.5	1	41	0.8	0.1
1.6	9.6	0.7	9	1	1
1.3	2.2	1.9	170	0.7	0.1
4.3	8.1	0.4	50	2.5	0.4
1.8	4.2	0.3	13	0.7	3.6
1.4	5.7	0.7	8	0.3	2.4
2.3	0.7	0.9	13	1.3	5
1.7	2.7	0.9	78	1	0.7
0.9	0.7	2	93	2.2	0.6
6.8	2	0.5	6	1.8	1.4
2.5	5.5	0.4	388	0.3	36
0.6	0.4	1.9	36	5.7	1
0.4	0.5	1.3	302	2.3	1.7
2.8	10	0.5	1	1.1	4.7
1	13.5	0.9	124	9.7	2.2
1.6	1.5	1	51	1	1.4
0.5	1	0.6	16	3.6	16.8
4.4	3.9	0.4	26	0.9	13.8
0.2	0.5	0.3	33	0.5	7.9
1.9	6.3	0.2	52	0.7	5.8
1.7	7.6	1.1	46	7.2	3.2
0.8	0.4	0.8	4	0.4	2
1	1.1	0.5	20	7.6	4.9
0.7	0.7	13.6	6	0.4	1.7
0.6	6.2	0.4	5	3	2
1.6	0.3	1.8	65	3.6	0.5
1.9	15.7	0.9	134	0.3	3.8
0.4	0.6	0.9	207	0.8	2.9
2.5	2.2	1.2	115	0.8	2.9
0.7	0.4	0.5	92	2.3	6.6
0.5	3.9	0.4	71	1.4	9.7
1	0.8	14.1	98	5.7	4.7
1.5	0.3	0.7	51	0.9	2.8
1.1	0.5	2.5	77	2.2	2.4
0.4	1	1.4	40	0.2	0.9
1	1.6	3.3	43	0.2	0.6
0.5	4.1	1.4	105	2.3	2.7
4.9	2.2	0.5	156	2.5	1.8
0.6	0.4	0.7	44	0.4	2.9
3.2	6.7	12.1	39	0.7	0.5
2	3.4	19.3	54	3.4	1
6.2	0.6	0.8	5	5.1	10.9
0.8	8.3	0.2	18	1.1	1.2
0.3	0.5	2.6	7	0.5	0.4
1	3.7	2.8	4	4.2	0.7
1.3	0.8	0.9	33	0.5	12.2
2.7	3	16	186	1.1	3.2
0.5	1.4	1.7	45	0.5	3.5
1.1	4.3	5.4	14	2.7	5.8
1	5.7	9.7	11	1.4	2.2
1.4	11	2.6	64	0.4	0.9
3.8	2.7	0.7	429	0.4	0.8
0.4	2.2	0.5	290	0.6	0.8
1	2.8	0.8	101	0.4	7.7
2.5	1.1	0.2	33	2.6	3.9
1.4	0.6	1.4	610	7.7	0.2
5	3.6	0.3	12	0.7	4.9
0.7	0.4	0.1	63	0.6	8.4
0.4	0.6	3.2	177	1	0.3
1.1	2.5	2	157	0.2	16.8
5	4.5	0.3	45	0.4	9
1.5	16.2	2.9	49	0.2	4.3
1.5	2.4	6.4	17	0.3	0.5
0.5	11.2	4.8	10	0.4	1.5
0.5	8.5	0.3	38	0.9	1
0.9	11	0.7	249	0.7	19.7
0.7	0.7	1.5	243	0.5	1.6
0.7	4.5	0.7	123	0.3	9
1.6	1.9	6.5	25	2.8	4.1
0.7	4.1	0.6	50	0.7	1.8
1	0.9	4.4	6	1.8	1
6	2.2	8.7	13	0.4	1.4
1.3	1.2	0.5	4	0.3	3.1
0.9	2	11.8	4	0.2	0.5
1.6	2.7	5.3	26	0.4	19.3
0.7	1.5	0.6	170	0.2	7.7
2.1	3	0.3	24	3.9	0.9
0.9	0.9	10.4	10	6	0.3
0.8	1.7	0.5	2	6.1	4.5
1	0.5	0.2	56	8.3	1.2
0.7	2	0.1	5	0.4	0.4
0.3	3.7	0.1	32	5.2	3.4
8	5	1.1	4	12.2	4.2
1.2	4.4	3.2	101	1.3	8
0.7	4.5	1	4	0.4	9.2
3.9	10.2	9	156	0.7	8.9
3.7	1.8	5	13	0.3	1
1.7	1.8	1.1	257	0.6	10.4
9	2.7	5.6	63	15.9	4.7
18.2	11.8	3.6	49	0.3	0.9
1.1	23.6	0.4	12	1.3	1.9
1.6	5.8	5.3	171	0.1	1.1
16	9.5	16.5	23	0.2	2.2
0.6	2.4	1.7	99	0.5	0.7
0.9	3.2	0.9	219	5.7	0.3
1.5	0.7	1	295	0.3	1.9
2.8	3.1	1.3	301	1.5	0.2
0.9	0.5	0.2	103	2.3	4.4
0.4	9.3	3.9	5	7.3	1.7
0.9	3.8	0.1	184	2.9	40.1
0.5	0.6	0.3	52	21.9	4
0.7	0.5	6.4	56	2.1	1
1.1	13.1	19.2	14	0.4	23.4
1.5	11.8	1.6	38	1.7	15.6
0.9	0.3	0.3	25	6.8	0.8
0.8	0.3	3	11	0.4	9.1
0.6	0.5	3.1	64	1.4	1.6
0.5	0.9	0.8	94	3	0.8
0.6	0.9	0.6	15	1.5	4.2
0.1	1.1	0.3	109	5.7	9.9
0.3	2.7	5.5	17	0.8	2.4
0.3	8.5	19	62	0.2	18.1
0.2	0.7	0.7	11	0.4	0.1
25.4	5.5	11.8	32	1.7	1.1
1.7	12.6	7.2	5	0.9	6.9
1.6	13.1	1.4	133	0.4	12.2
5.8	7.7	2.1	8	0.6	1.3
4.3	7.7	0.7	8	0.9	11.2
4.5	1.1	0.6	190	0.6	7.6
0.6	3.3	2.9	10	0.5	10.4
0.8	2.2	9	94	0.4	1.2
0.5	0.5	2.6	83	1.4	0.8
0.7	1.3	0.7	17	0.9	7.9
4.5	1.4	1.3	33	0.8	12.6
0.8	7	5.5	306	0.2	2.6
1.7	3.8	1	44	1	2.3
0.3	3.2	1.6	2	0.2	12.1
0.9	0.8	0.6	38	0.4	2
8.9	2.3	9.9	6	2.2	7.3
2.1	6.3	0.8	11	0.1	2
0.1	1.4	3	9	1.5	40.1
4.1	0.8	1.3	268	0.8	3.8
0.3	3.4	0.5	58	1.8	1.4
3	3.8	1	23	0.6	0.5
0.5	2	0.5	26	5.3	0.7
0.5	11.2	0.4	63	9.7	7.8
2.2	18.2	0.9	6	5.3	1.5
2.4	6.1	1.9	144	0.8	4.3
4.4	2.4	0.3	320	0.6	2
3	2.8	0.5	227	10.8	1.3
2.1	4.1	39.1	24	32.7	0.9
0.8	7.9	0.2	27	0.9	25
4.4	2.9	1.4	5	34.9	4.5
0.7	1.7	1.7	35	1.1	1
6.3	12.2	0.9	48	0.1	0.4
1.5	12	2.9	8	6.3	6.7
9.5	3.4	2.3	310	0.7	31.4
1.6	3.3	0.5	7	0.2	0.1
2.2	3.2	0.2	22	2.7	0.4
1.4	2	0.2	65	2.2	3.3
0.2	1.5	0.2	84	1.6	1.3
22.2	2.4	0.2	53	1.7	0.3
0.7	4.9	0.2	43	1	4.1
3.8	0.3	0.3	53	1	4.3
1	5.5	1.1	42	1.2	7.7
1.8	17	0.7	1	0.4	2.9
1.1	1.9	0.3	4	2.4	0.8
0.7	2.9	0.3	116	0.8	4.8
0.6	0.5	0.5	11	0.8	0.8
1.2	0.6	3.8	19	3.7	0.8
0.7	1.2	2.3	82	13.3	1.5
2.1	2.3	1	38	2	15.1
6	0.4	2	60	1.5	7.9
2.8	3.5	0.7	60	28.9	13.1
0.8	2.3	0.6	13	30.3	6.8
0.4	2.4	2.2	42	0.5	3.2
2	2.3	0.5	35	0.2	0.3
1.7	1.3	0.4	5	5.1	0.7
1.4	8.8	12.3	14	5.1	11
0.7	22.5	2.4	2	6.1	12.5
0.5	2.5	0.9	12	1.4	3.3
9.6	0.9	0.3	35	0.5	1.2
1.3	1.3	4.6	6	0.3	2.6
2	11.4	0.8	146	0.4	37.6
1.5	1.3	0.6	57	17.8	3.8
0.8	2.1	2.8	20	0.6	12.5
0.9	3.2	2.8	12	0.1	1.3
0.1	2.6	0.2	65	0.4	17.2
0.2	3.4	1.1	60	0.3	0.3
1.3	1.6	0.2	237	0.1	4.4
14.2	0.7	0.6	70	4.7	7.1
2.1	1.1	8.2	99	2.8	0.6
2.9	1.6	0.5	41	11.4	5.3
1	2.7	5.4	26	9.1	0.3
0.6	2.2	2.4	8	0.4	0.4
0.7	25.3	0.2	80	0.3	35.8
1	4.7	23.1	8	1.2	20
1.1	0.6	1.3	7	1.3	3.4
7.4	2.5	0.7	25	0.2	5.7
0.9	0.8	2.9	6	0.3	7.4
4	4.7	22.5	325	0.5	5.3
2.3	1.2	18.7	124	0.3	2.9
1	0.7	1.9	68	0.2	0.6
2.3	0.8	5.5	21	2.2	0.4
0.7	7.8	3.8	15	1.6	2.3
0.8	21.7	0.7	7	2.1	2.8
0.5	2.7	2.2	10	0.2	0.5
1.7	3.2	0.3	3	1.1	0.8
0.3	0.4	0.1	203	0.3	2.3
1.1	5.4	0.2	20	0.4	2.8
0.2	0.6		64	1	1.8
2.1	0.8		424	1.1	1.4
14.4	5.2		57	0.2	1
2.5	1.1		34	0.5	2.4
1.2	0.7		183	0.6	2
0.6	0.6		187	0.1	76.3
1.6	2.9		54	0.3	13.4
5.4	3.7		16	0.6	7.9
14.7	1.8		94	5.6	40
5.6	4.7		6	6.6	1.7
0.5	11.9		34	1.5	17
3.6	2.9		18	3.8	0.6
2.3	6.1		51	0.2	15
1	0.2		20	9.1	0.4
1.3	0.7		341	0.3	0.4
1.1	2.1		16	0.8	7.4
1.8	1.3		15	3	20.5
0.9	41.4		5	6.2	0.7
0.4	11		3	1.6	7.3
0.4	8.3		5	2.4	44.3
1.9	2		52	0.4	1.6
1	0.9		5	1.1	3.2
0.3	1.1		39	0.9	11.6
0.2	1.3		5	0.5	4
0.2	1.9		6	19	3.1
1.8	3.6		7	17.5	3.9
1.3	4.9		23	0.5	2.6
2.5	0.8		23	0.2	0.7
1.4	0.7		88	0.3	2.4
0.6	1.9		21	0.4	54.9
1.3	0.6		116	0.4	0.9
0.6	1.8		2	0.5	0.4
6.8	3.7		206	0.5	15.6
0.9	1.7		150	2.3	2.9
1	1.5		3	0.2	6.3
0.9	0.7		45	2.3	0.3
1	0.7		2	0.9	0.5
0.4	1		8	0.5	1.5
0.4	0.9		4	0.4	0.8
0.7	2.3		5	0.2	0.8
0.6	0.5		4	0.4	2.4
1.6	0.4		90	2	3.1
1.1	0.4		74	5.2	4.3
1.7	18.3		22	0.3	6.7
0.7	2.8		28	19.1	2.1
3.3	1.3		7	0.7	2.8
1	0.9		177	5.7	3.2
1.1	1.5		9	4.9	1.5
1	3.7		14	0.5	2.1
4.3	9		5	40	15.6
2.9	25.3		9	1	4.5
8.2	8.5		15	1.8	2.2
1.4	1.3		23	8.3	0.7
1.7	3.3		230	1.3	0.3
5.6	7.2		36	0.2	0.4
1.3	1.9		51	0.4	0.6
1.2	0.5		10	1.4	1.7
1.3	1.6		30	0.1	2.7
19.1	1.4		48	3.8	0.1
1.4	1.4		7	0.3	2
1.6	7.7		31	0.6	10.9
0.7	4.9		6	0.7	10.1
0.2	10.9		22	0.1	3.5
2.5	1.3		13	2.5	0.9
1.3	5.4		37	3.8	1
1.9	2.8		51	0.5	6.4
0.9	1.7		145	2.5	2.8
1.5	0.6		7	1.2	38.6
1.5	1.9		6	0.4	6.9
0.5	2.3		102	4	0.9
0.7	2.2		10	0.2	32
1.1	1.7		27	0.3	1.3
1.2	1.6		72	0.3	13.8
1.3	8.4		222	0.4	0.8
2.5	0.9		92	0.8	3.4
1.1	1		748	1.1	1.3
0.9	1.7		29	0.2	4.3
1.8	2.2		324	3.7	8.6
0.7	1.4		31	59.6	21.2
1.2	6.2		8	1	16
0.7	0.6		19	1.7	16.5
9.7	1.4		10	0.5	0.8
0.7	3.7		18	0.8	0.6
2.3	0.8		58	0.1	1.5
0.7	0.5		27	0.5	2.6
0.8	0.5		11	0.2	0.8
0.5	0.9		31	0.2	2
1.3	0.7		6	0.1	11.6
0.5	0.7		13	0.3	5.1
0.4	3.6		192	1	1.5
0.1	3		1	0.1	0.8
0.4	2.9		5	3	5.6
0.4	0.4		24	0.7	2.9
0.5	1.1		256	0.1	0.5
0.7	1.8		198	0.9	9
3.4	9.6		43	0.9	3.4
0.6	0.8		6	10.5	5.8
1.3	1.7		6	1.5	7.1
5.9	1.8		496	1.3	27.9
56.2	17.8		16	8	2.9
3.1	0.9		42	1.6	4.9
3.1	0.3		27	0.2	1
1.2	5		17	1.1	1.5
1.6	0.4		24	0.8	0.7
1	1.3		20	1.1	6.4
0.7	1.3		101	1.5	0.9
1.1	3.3		170	13.6	4.1
0.9	6		105	8	18.9
1	7.3		28	0.6	2
4.8	6.2		24	1.8	8.3
1.6	2.5		10	6.8	2.2
2.5	0.6		2	2.1	2.9
2.4	8		7	2.4	3.9
1	2.8		32	0.4	0.2
1.2	5.3		98	0.2	1.6
1.1	5.2		17	0.1	1
0.6	7.2		8	19.9	0.3
5.8	4.8		24	0.5	0.8
4	1.2		61	0.6	2.2
1.5	0.8		85	0.4	2.6
0.3	0.9		75	0.4	6.3
1.8	4.2		32	0.3	1
0.6	1.3		8	0.9	2.6
1.6	2		67	3.4	1.6
0.6	2.1		92	1.7	2.4
0.5	8.1		243	0.8	15.4
0.7	12.6		53	0.5	6.3
0.8	4.8		15	3.3	15.1
0.9	2.3		10	1.6	0.6
0.9	2.8		130	1.9	0.2
3.2	3.7		18	1.3	6.8
0.8	3.6		102	2	1.2
1.4	4.7		203	0.8	1
9.3	1.9		6	0.2	0.7
3.6	2.9		60	0.4	6.9
1.7	1.1		13	0.4	5.1
0.7	1.7		184	11.5	0.5
29.2	0.8		86	0.2	1
1	0.8		8	0.2	0.4
0.2	7		85	1	7.5
0.8	8.6		9	0.2	17.9
9.4	4.5		9	0.4	1.1
9.6	0.9		40	0.6	2.8
3.6	1.5		89	0.4	1
1.3	2.7		9	0.4	2.6
0.8	2		33	0.3	1.5
20.2	1.2		105	0.9	18.5
0.9	1.6		53	2.2	4.2
2.4	3		3	5.9	2.8
0.8	1.7		8	0.1	7.2
3.2	5.2		15	0.4	0.4
1.9	8.2		285	3.3	1.9
2	1.1		243	3.2	1.4
1	1.5		94	0.6	10.5
10.9	0.7		21	0.7	0.9
2.3	1.2		27	0.1	0.6
1.1	1.9		8	0.6	2.6
1.9	6.1		18	0.5	0.8
1	6.5		9	0.3	4.3
0.8	1.5		58	0.3	0.5
0.7	6.8		131	1.1	2.6
0.7	1.8		11	0.6	0.9
1.6	3.5		12	0.4	17.6
0.5	2.5		17	14.6	1.1
3.7	1		7	0.3	5.4
0.5	0.8		7	0.4	2
5.8	0.3		6	0.3	3.8
1	0.7		6	0.4	4.1
0.3	9.8		2	0.3	2.1
0.4	1.5		28	14.2	1.1
1	31.3		1	0.2	11.4
1.2	4.3		22	0.7	1.3
0.4	2.7		16	0.9	0.5
1.6	8.2		1	0.6	0.9
4.1	6.9		217	16.1	0.6
3.2	1.7		28	0.3	1.6
2.3	1.3		162	8.7	1.2
0.5	23.4		13	1.9	2.1
2.7	4.6		18	0.9	12.4
1.8	9.4		19	1.9	2.4
0.5	5.3		9	0.9	3.6
2	0.6		15	2	0.9
1.6	11.4		35	0.9	0.9
2.4	5.2		29	9.7	6.6
0.8	1.8		87	0.3	5.3
1.3	0.4		23	0.8	12.4
7.1	1.1		221	2.5	5.3
2.1	16.7		16	1.4	10.4
6.8	3.2		41	1.1	1.1
1	4.6		12	3.5	0.5
0.9	0.9		58	2	16.7
0.6	0.9		164	0.6	21.3
0.5	3		99	11.6	14.6
2.8	2.6		6	0.9	9.8
0.5	2.6		83	1.8	6.2
0.3	1.8		78	1.3	4.9
0.5	13.9		10	2	2.8
0.6	0.8		9	0.7	1.4
0.8	27.6		31	0.4	0.9
14.7	11.2		5	24.4	1.7
5.1	1		2	12.6	4.6
2	1.7		5	3.6	1.4
0.6	2.2		5	2	0.9
6.8	0.5		52	0.5	3.1
0.8	0.7		45	3	1.5
2.7	1.5		76	21	4.3
0.8	1.8		5	2.4	15.8
0.7	1.1		85	2.3	0.6
0.7	22.6		16	1	32.9
1.1	1.5		30	5.9	7
0.2	0.7		82	0.3	0.5
1.5	1.1		26	3.1	4.8
1.5	2		130	2.3	1.6
4.8	0.4		86	8.9	0.7
2.8	0.9		23	4.7	0.5
1.8	7.7		46	0.8	9.4
2.5	3		8	0.3	48.1
0.8	8.3		14	0.5	12.7
3.9	1.7		42	4.3	4.4
0.4	1.5		67	1.6	1.6
0.7	0.8		5	4.3	1.1
0.5	1.3		4	4.1	3
1.2	5		5	4	3.6
0.4	1.4		203	0.7	17.6
1	2.3		19	0.1	0.4
0.8	0.7		5	11.6	3.1
1.8	0.5		43	0.2	7.6
1.6	0.5		11	0.4	23.7
6	0.5		18	4.4	0.9
1.1	0.5		7	7.3	5.7
1	0.5		8	2.2	0.6
2.4	0.5		29	0.3	0.5
2.7	0.4		7	1.2	2.2
12.9	8		7	0.6	0.6
1	4.6		7	0.4	0.2
10.3	2.4		29	3.5	1
2.2	2.2		24	0.1	2.4
1.2	4.3		127	0.3	0.6
1.3	1.8		48	6.2	0.5
14.6	0.9		5	1.5	0.1
2.5	1.3		47	0.4	2.3
0.6	1.5		364	1.6	3.2
0.3	6.4		23	0.1	7.6
3.2	3.9		23	0.6	3.1
2.6	2.4		96	0.5	2.6
0.6	6.9		108	1.2	5.3
0.4	10.6		23	0.3	2
2.2	1.4		23	22.6	1.7
6.8	2.3		33	0.4	1.6
4.4	12		10	0.4	27.8
1.7	16.2		9	1.8	12.6
3.7	1.3		6	8	1.7
5.4	3.4		5	28.6	0.2
0.8	5.3		216	0.2	9.6
0.8	1.2		9	7.8	4.2
0.8	0.4		16	3.2	0.9
18.8	0.8		54	1	1.4
27.9	3.2		4	2.5	1.1
0.8	0.7		522	0.2	4
0.3	0.8		37	4.2	17.7
0.7	4.2		63	3.8	3.4
0.7	8.7		80	5.7	7.9
0.7	0.5		7	0.1	9
1.6	4.3		26	0.3	15.9
1.7	0.7		5	0.1	0.7
0.7	4.2		5	1.3	0.1
5.6	2.1		58	4.8	3.6
4.6	9.4		66	0.7	6.8
1.5	2.1		6	1.1	1.1
0.8	1.2		64	0.4	2.4
0.8	18		37	1.1	4.8
1.8	16.8		196	3.9	0.1
5	5.1		133	1.2	10
6.7	14		15	1.7	0.2
1.3	27.1		137	0.3	0.2
0.7	2.4		19	1.9	6
0.9	43.3		12	6.5	22.2
2.4	9.4		11	2.3	0.7
0.9	2.7		2	23.8	0.3
2	10.5		6	1.9	0.9
2.2	2.4		6	0.4	0.8
2	3.3		18	0.1	1.1
18.1	0.9		5	0.2	2
1.6	0.4		13	0.2	7.7
2.4	1.4		14	0.7	4.2
1.2	2		23	0.4	11.7
1.2	1.6		23	1.3	9.3
1.4	1.8		42	1.4	20.8
13.3	14.8		132	15.7	0.6
19.8	1.1		18	0.4	3.5
52.1	1.2		11	1.4	0.3
0.5	6.6		5	2	7.4
0.2	4.4		8	3.3	3.1
0.4	1.6		2	0.4	4.2
2.1	20.1		108	3.9	25.1
0.7	16		6	1.2	7
0.8	10		10	6.5	6.5
1.4	24.2		23	0.7	6.9
0.9	1.9		3	4	1
2.3	15.3		8	3.9	26.3
2.1	10.7		21	1.8	0.9
4.9	7		20	0.3	4.5
0.5	7.1		60	0.4	9.8
0.5	4.8		157	0.1	1.4
0.4	8.6		23	0.2	0.5
2.9	8.8		19	0.9	11.7
0.9	13.3		10	5.3	0.9
4.1	0.8		21	0.6	1
0.9	2			2.2	1.3
0.7	3.8			1.6	4.4
2	4.6			0.7	7
1	8.3			3.2	1.3
1.9	1.7			0.9	0.4
0.6	0.9			2.4	1.2
0.5	2.7			0.1	5
0.4	0.9			0.5	0.4
0.2	1.8			0.3	0.6
3.7	0.8			0.6	32.4
1.9	0.6			3.1	2.1
0.8	0.7			1.1	0.5
1.5	0.5			0.7	0.7
4.8	2.5			0.6	0.5
17.8	0.5			16	25.8
0.8	0.4			10	14.4
12.5	0.7			0.5	7
0.6	0.6			1.4	3.6
0.6	0.5			0.5	3.8
0.4	2.5			0.5	3.7
0.2	3.2			2.2	5.2
4.8	1.8			8.8	1.3
1.9	1.2			6.9	9.6
0.4	5.8			1.1	4.1
0.8	11.4			0.1	9
0.7	32.6			0.4	2
1.1	4			0.2	13.7
3	3.3			1.5	7.2
0.6	2.8			0.5	0.4
4	2.3			0.2	2.8
1.4	12			0.6	17.3
1.2	1			1.2	2.5
2.1	8.2			5.1	18.7
0.9	1.5			0.6	4.3
4.4	0.5			0.3	5
0.7	1.2			0.2	8.8
0.3	4.6			4.8	0.8
0.2	0.3			0.6	1.3
0.1	0.5			0.6	1.3
0.9	5.3			4.6	2.3
0.9	1.1			0.5	43.1
11.7	15.9			1	0.9
1.4	9.2			0.6	2.8
0.5	2.2			21.9	4.2
1.8	3.2			21.2	3.8
0.7	2.7			16.9	0.7
1.2	3.8			0.4	0.7
0.7	18.9			0.6	3.8
0.3	18.6			1.9	4.2
4.5	8.3			0.2	2.4
0.9	4.4			0.2	14.4
1.6	1.7			12.1	2.3
0.5	1			0.5	0.6
0.1	1			1.8	15.1
0.6	1			1.6	1
1.7	7.3			1.7	1
1	12.2			0.8	0.5
0.4	1			4.2	0.4
3.6	14.7			0.4	0.8
0.4	0.8			13.1	6.5
1	4.3			0.3	0.9
0.5	7.1			1.1	4
1.6	6.7			1.4	1.1
4.4	2.3			4	33
0.8	3.9			3.2	9.5
0.4	6.3			0.3	9.6
0.7	1.2			0.4	2.6
0.5	0.6			0.6	2.5
2.4	6.9			0.8	1.9
1	1.1			0.9	3.3
1.6	1.8			2.3	1.6
0.6	0.7			2.2	0.6
2.7	1.2			0.4	18.5
6.3	1			0.9	7.9
1.4	5.2			1.6	0.9
0.5	16			0.4	10.1
1.6	2.5			1.1	4.2
0.9	1			0.6	1
0.6	1			0.3	2
16.6	1.9			0.3	0.4
1.8	1.3			0.3	0.8
1.9	0.4			1.1	1.3
1.3	0.8			2.2	1
25.6	0.6			4.1	1.8
2.6	0.5			0.4	8.1
1.6	0.4			1.6	4.1
10.5	0.6			0.3	30.7
0.5	1.8			36	4.9
1.2	5.9			0.5	2.6
1.1	4.2			0.9	1.6
0.9	1			0.7	0.2
2.2	0.4			0.5	0.3
0.6	6.1			0.6	3.8
0.7	1.1			0.4	1.1
0.7	9.2			1.7	46.2
0.8	2.5			0.5	3.8
12.1	15.2			0.4	19.3
1.4	31.7			0.2	4.5
1.3	9.4			0.4	4.6
0.6	6.2			0.8	11.8
0.2	0.6			3.8	0.8
0.7	2.6			2.1	0.9
0.2	1.8			0.4	4.6
0.4	5.2			0.9	1.3
0.4	0.9			0.2	5.9
0.6	1.2			1.1	2.1
4	1			0.7	2.7
2.9	16			0.3	9
0.7	1.4			1.9	3.4
9	5.5			0.9	3.6
3.3	4.4			0.2	0.6
0.6	1.5			1.2	0.7
0.5	1.3			0.5	0.7
0.9	1.5			0.5	0.6
46.7	4.6			1.5	3.6
58.5	4.2			0.3	1.1
0.7	6.6			2.2	1.8
1.1	5.1			0.9	6
2.8	29.4			1.1	2.3
14.3	24.7			7.4	3.2
1.2	2			0.2	1.6
1	3.9			3.5	4.6
0.5	1.1			2.2	4.3
1	9.5			1.9	2.4
1	2.2			5.9	2.5
1.1	6.1			1.2	2.7
1.6	13.2			0.9	1.8
1.8	1.3			2.1	12.4
1.3	1.5			0.6	1.8
0.2	2.8			3.4	6.5
13	1.3			0.6	0.7
0.3	3.4			1.8	0.8
5.6	1.5			0.4	2.8
0.6	0.8			13.1	0.5
10	0.8			0.2	0.4
0.4	3			1.9	11.7
0.9	0.7			44.2	2.2
0.7	2.3			22.8	6.7
1.6	0.9			0.6	18.8
0.4	1.3			0.4	14
1.4	15.3			0.4	2.4
0.3	1.5			0.4	1.1
0.5	0.8			0.4	3.5
0.7	1.1			2.6	0.7
0.4	10.9			0.4	4.7
0.2	8.9			0.9	1.7
0.7	3.5			0.4	2.7
0.8	4.8			3.5	2.4
0.8	1.9			0.9	1.8
0.6	0.4			0.2	3.7
2.2	5.9			0.6	0.6
5.3	6.1			0.1	0.9
2.9	9.2			0.2	19.8
0.7	2.5			0.4	6
0.2	1.7			0.4	1.1
0.5	0.7			0.2	4.4
0.4	2.4			0.7	0.8
1.3	0.9			1.3	4.2
1	0.6			2.5	2.5
0.7	1.3			0.3	3.3
5.6	7.4			0.4	2.9
2.2	3.2			0.5	1.5
9.2	18.3			1.1	3.8
2.2	4			0.5	0.7
3	3.6			0.4	5
8.3	16.4			0.6	2.9
3.6	2.7			0.6	0.6
0.4	4.1			0.5	0.3
3.9	1.3			0.3	1.1
2.3	14.2			3.1	8.9
0.7	8.1			0.7	0.6
0.4	3.6			0.4	0.8
1.1	12.8			0.2	0.4
5.3	1.2			0.4	21.9
1	0.4			0.7	6.9
0.8	0.6			0.5	0.3
1.7	1.1			0.7	4
12.4	0.7			0.9	13.1
1.6	0.5			0.7	3.9
1.1	1.2			0.6	8.2
1.5	13.4			7.8	0.5
1.1	17.3			0.7	15.4
0.6	2.2			4	3
1.1	14.2			0.9	5
0.5	4.1			0.3	0.3
1.8	2.5			0.6	1
0.9	21.2			0.4	4.8
0.6	10.5			1.3	0.2
1.8	1.3			0.5	0.7
0.8	1.7			0.5	0.5
2.8	1.4			0.3	4
0.6	1.1			0.9	3
0.4	8.5			1.2	4.5
4.6	0.7			3.5	1.1
4.2	0.8			8	0.9
0.8	1			0.3	8.6
0.7	0.5			0.3	0.2
1.3	5.6			0.2	2
0.6	54			1	25.9
1.9	4			0.3	3.2
0.6	2.8			0.6	78.4
0.1	6.2			6.4	0.5
1.9	2.2			1.7	1.7
0.3	11.4			0.5	13
2.3	33.1			1.2	2.8
1.7	1.5			1.1	3.1
1.7	1.1			0.6	1.9
2.4	15.4			3.8	1
0.9	2			3.4	2.6
5.7	2.5			0.3	2.6
9.2	5.7			0.4	0.7
2	5			0.3	11.1
0.4	10			4.2	2.4
5.4	6.8			0.7	1.3
0.8	2.6			1.1	0.5
0.1	1.4			0.6	2.5
2	4.8			0.3	27
5.7	4.3			0.4	0.9
1.2	3.8			0.4	1.6
2.5	1.7			0.5	0.9
3.2	21.6			0.3	2.1
1.1	1.8			3.2	1.6
1.2	0.1			0.4	1
1.5	0.9			0.2	1.7
0.4	7.4			0.1	8
0.9	1.8			0.5	0.8
0.1	2.7			0.3	30
3.9	0.9			4.5	0.4
1.4	1.5			0.9	1.7
4.9	5.7			0.6	0.5
1.9	4.1			1.1	1.3
2.2	9.4			1.6	0.7
2.1	44.5			0.3	2
1.3	28.6			1.4	2.8
1.7	2.5			0.3	2.1
1.2	12.2			0.1	0.4
0.3	2.8			0.1	5.6
1.6	1			0.3	1.9
23.3	0.8			0.2	16.1
1.9	0.8			2.3	1.6
2	2.7			1.6	3.3
0.2	16.7			0.5	1.4
0.3	11			0.3	1.5
4.8	5.5			0.4	0.4
0.8	1.7			0.4	4.2
4.8	0.6				1.4
0.7	8.3				8.7
1.2	2.9				6
3.3	0.3				0.7
2.3	4.8				0.5
0.4	20.1				1.7
0.2	1.5				1.6
0.5	8.1				1.2
0.3	0.5				3.8
0.9	3.5				0.7
0.5	9.4				2.3
8.8	76.6				2.1
3.6	6.3				3.9
1	4.4				0.3
2.2	5				0.8
3.8	1.4				1
1.5	2.6				0.4
1.9	1.1				7.6
9.3	32.9				3
4.8	7.5				3.6
10.6	7.6				20.4
1.2	1.5				5.4
2.3	0.9				0.4
6.7	0.4				1.8
1.6	7				19.2
2.3	1.4				1.3
4.1	2.3				17.8
0.9	1				2.4
2.4	10.6				2.5
8.7	38.3				1.8
1.6	0.9				9.2
2	36.8				1.5
4.3	1.5				9.5
0.7	4.1				5.9
0.5	3.3				6
0.7	0.5				2.8
2.5	30				2.4
1.8	12.5				1.3
3.7	26				2.6
2.3	4.1				9.9
12	2.2				2.4
2.4	0.9				5.9
6.3	0.5				0.7
1.7	20.8				7.5
3.4	12.2				2.2
0.4	1.1				2.1
8.7	2.1				0.9
2.4	5				0.5
1.1	5.2				2.3
0.6	1.3				15.8
1.7	31.4				9.8
1.4	7				0.8
1.3	24.9				1.7
0.3	0.3				1.4
1.5	1.6				6.1
0.4	1.3				20
0.4	0.4				0.9
0.5	0.3				1.8
1.3	1				6.1
1.5	20.2				0.8
0.9	8.4				1.2
1	1.3				10.5
0.9	5.1				1.9
0.5	7.3				2.8
2.4	2.4				1.2
3.1	0.8				4.8
0.8	3				1.9
1.4	3.6				2.9
0.2	3.1				0.5
6	3.4				0.5
0.7	24				2
0.4	7.1				3.2
5	6				3.3
1.1	5.9				0.6
1	23.5				3.9
1.2	9.4				0.7
1.9	7.2				0.5
0.4	11.1				1.1
0.3	6.9				4.1
0.3	2.3				2.8
16.1	3				2
0.5	7.6				0.9
0.6	25.4				0.3
0.3	2				1.5
6.7	5.8				6.5
1.1	7.9				8.5
0.8	9.3				10.8
0.4	1.9				2
5.4	0.9				1.2
1.9	0.9				0.8
3	0.9				12
0.6	7.3				0.9
1.1	0.8				1.1
4.3	0.5				0.4
5.5	4.2				18.5
1.5	0.7				4.7
11.1	0.7				4.6
2.5	13.3				1.8
1.8	5.7				0.9
4.6	9.1				2
2.2	7.6				0.8
0.5	10.3				0.9
14	11.4				9.5
1.4	15.2				1.2
0.1	2.6				8
1.7	18.1				0.7
1.7	6.5				2.9
1.2	0.5				6.3
1.9	1.5				0.2
5.7	0.7				2
0.4	0.8				6.1
1	9.3				1.6
	13.5				21.6
	4.9				3.1
	2.1				1.9
	2.8				0.4
	1.2				2
	28.6				12.8
	0.8				4.5
	1.7				4.7
	3.1				1.6
	2				2.8
	14.1				2.7
	2.1				6.7
	1.1				2.3
	2				1.8
	17.9				2.3
	13.5				0.3
	23.2				3.3
	1.9				4.4
	9.3				0.9
	12.2				3.9
	1.9				1.5
	1.4				3.4
	1.9				1
	0.8				0.5
	2.9				6.1
	0.8				7.6
	1.4				0.6
	1.4				0.4
	4.3				2.7
	4.3				8.1
	4.9				1.5
	2				0.8
	0.7				2.3
	16.7				2
	3.4				4.9
	0.5				1.3
	20.8				25.9
	0.6				16.5
	1				1.6
	0.5				2
	0.6				2.6
	0.7				0.4
	0.6				8.4
	5				1.2
	0.6				0.7
	1.2				1.8
	1.9				46.5
	0.7				2.9
	1.3				4.1
	0.4				3.7
	8.1				2.9
	0.6				1.8
	5.1				3.9
	2.3				2.8
	5.2				4.3
	11.2				3.7
	0.4				2.7
	2.7				2.5
	4.4				1
	0.6				0.6
	0.8				0.3
	0.5				3
	11.3				1.4
	0.5				2.9
	4.9				12.1
	2.3				15.3
	1.9				1.8
	2.2				52.5
	4.4				1.7
	1				0.9
	0.5				5.2
	0.4				0.3
	63.5				1
	0.6				0.7
	0.7				1
	0.5				0.8
	2.1				1.9
	1.5				9.2
	4.8				1.6
	4				0.8
	0.4				36.7
	13.4				5.4
	3.6				1.5
	4.2				0.5
	23.4				11.9
	0.8				11.8
	4.1				0.9
	0.6				0.9
	8.9				0.5
	1.1				0.9
	1.3
	2.5
	0.9
	0.7
	3.9
	0.6
	3
	7.9
	1.2
	0.6
	3.5
	0.9
	0.2
	40.1
	0.8
	9.1
	4.8
	3.6
	0.8
	3.7
	1.6
	5.6
	10.1
	0.4
	5.3
	0.8
	2.5
	1.8
	1.9
	0.2
	0.9
	0.7
	2.9
	28.4
	4.9
	0.6
	1.6
	2.8
	1
	0.4
	33.3
	9.4
	5.1
	1.8
	5.5
	35.6
	2.2
	0.6
	2
	0.4
	3.4
	0.4
	0.4
	0.9
	12.1
	1.2
	0.8
	61.2
	8.4
	3.1
	3.8
	9.6
	1.8
	5.1
	1.2
	25.3
	6.5
	0.7
	1.3
	1.8
	1.1
	4.2
	0.6
	3
	5.3
	1.9
	2
	4.6
	2
	0.4
	0.3
	1.9
	5.4
	1.7
	5.3
	1.1
	1.3
	3.6
	0.9
	0.5
	5.1
	8.1
	14.7
	1.2
	0.3
	0.4
	2.6
	0.5
	1
	15.8
	4.2
	2.8
	3
	2.1
	1.5
	31.9
	9.8
	26.8
	0.4
	7.8
	2.3
	1.8
	0.9
	0.5
	0.4
	1
	0.5
	6
	1.5
	20.2
	0.9
	0.5
	1
	2.3
	6.3
	5.9
	1.6
	0.3
	0.7
	2.5
	6.4
	0.7
	6.2
	0.8
	24.4
	1.4
	1.3
	5.9
	42.1
	2.4
	1.2
	0.1
	1.8
	1
	18.3
	1.9
	7.6
	1.9
	3.6
	2.6
	1.6
	11
	1.3
	0.7
	0.9
	9.4
	5.8
	14.4
	3.6
	2.6
	6.6
	28.5
	12.4
	0.7
	1.1
	0.8
	12.8
	1.7
	3.3
	0.8
	0.6
	3.9
	1.2
	0.6
	8.3
	26
	1.3
	2.5
	1.9
	4.9
	2
	1.9
	0.5
	1.8
	1
	3.4
	5.3
	0.5
	6.8
	1.5
	1.1
	0.5
	1.3
	0.9
	1.6
	6.5
	3.3
	2.4
	0.3
	12.5
	1.8
	3.4
	0.9
	6.4
	11.5
	24.9
	0.4
	42.1
	9.3
	1.5
	15.6
	1.5
	0.7
	1.5
	4.7
	1.7
	1.3
	0.8
	0.6
	3.7
	23.4
	5.1
	35.9
	31.2
	4.3
	5.1
	6.4
	9
	8.6
	2.4
	0.6
	1.7
	2.1
	30.1
	2.2
	3.4
	8.1
	3.1
	0.4
	0.3
	10
	2.3
	3.9
	10.1
	23.1
	9.9
	10.1
	3.7
	24.5
	6.9
	1.1
	1.2
	0.6
	7
	1.1
	5.1
	6.2
	3.9
	2.6
	2.1
	1
	1.5
	1.1
	3.7
	16.5
	24.3
	1.3
	6.2
	13.8
	2.8
	0.8
	2.3
	1.1
	0.9
	2.4
	1.9
	9
	1.9
	2.2
	10.6
	4.3
	11.8
	4.3
	3.3
	1.6
	20.6
	1
	1.9
	1.1
	17.9
	8.4
	7.2
	1.2
	2.2
	0.5
	7.2
	10.8
	4.9
	4.2
	13.6
	0.4
	1
	0.4
	0.3
	0.1
	0.6
	0.7
	0.4
	1.1
	69.2
	4.6
	3.4
	3
	5.1
	14.2
	0.6
	0.8
	0.9
	3.2
	1.2
	5.9
	2
	0.5
	2.1
	2.6
	12
	3
	13.9
	1
	0.4
	0.1
	13.6
	2
	16.8
	21.8
	18.2
	1.4
	3.4
	38.7
	2.4
	2.7
	1
	9.2
	1.9
	2.2
	0.5
	2.4
	0.5
	0.6
	6.4
	0.4
	19
	1.7
	4
	2.9
	0.7
	1.4
	3
	7
	0.6
	0.7
	0.8
	4
	2.6
	1.7
	1.3
	12.4
	35.2
	5.2
	19.6
	7.9
	3.1
	4.2
	5.7
	0.2
	0.4
	0.2
	0.5
	9.2
	5.5
	0.5
	0.6
	0.6
	0.5
	2.3
	0.8
	0.1
	3.4
	0.5
	0.2
	3.7
	5
	4.4
	4
	3
	3.9
	9.7
	19.2
	6.4
	0.9
	1.5
	1.2
	0.9
	0.4
	4.1
	1.9
	0.8
	0.5
	13.8
	52.2
	9.7
	6.5
	1.3
	21.7
	7.2
	1.6
	0.6
	14.1
	18.9
	9
	0.8
	0.6
	7.2
	2.4
	10.8
	1.4
	0.1
	3.6
	7.9
	5.3
	1.9
	1.6
	4.2
	7.5
	1.4
	0.3
	0.6
	8.5
	8
	1.5
	25.8
	2.9
	0.8
	0.7
	2.4
	1.6
	2.9
	2.2
	19.3
	11.2
	6.7
	4.4
	1.5
	10.4
	2.4
	0.6
	0.6
	0.6
	1.1
	0.6
	2.3
	2.2
	1.7
	0.6
	0.9
	1.4
	5.4
	12.3
	4
	3.7
	6.7
	0.3
	21
	0.8
	4.4
	1.3
	4.9
	0.7
	1.7
	6.3
	2.9
	4
	2.4
	20.5
	3.8
	5.3
	9.4
	2.3
	1.4
	28.3
	0.8
	0.8
	0.3
	0.3
	7.9
	0.7
	1.3
	0.8
	16.6
	7.3
	1.2
	1.3
	1
	4
	1.5
	3.3
	0.6
	0.4
	0.5
	0.4
	14.6
	35.7
	22.2
	0.8
	0.6
	6.6
	4.6
	94.2
	5.2
	15.2
	4
	5
	42.7
	3.7
	13.1
	4.2
	26
	1
	2
	0.6
	1.8
	11.5
	0.1
	0.2
	19.8
	2.4
	1.5
	18.5
	2.2
	0.9
	2.7
	23.2
	8.9
	7.8
	6.8
	0.4
	0.6
	19.4
	53.3
	1.1
	5.3
	1.1
	5.4
	0.7
	0.5
	7.5
	16.8
	22.3
	6.9
	0.3
	2.8
	0.8
	11.4
	1.8
	1.4
	5.8
	7
	1.5
	1
	3.9
	6.2
	1.7
	2.2
	1
	0.2
	0.4
	1.2
	3.7
	2.2
	0.6
	13
	2.1
	1.1
	1.4
	1.1
	0.3
	0.5
	1.5
	4.5
	1.8
	0.9
	0.9
	1.1
	6.8
	2.4
	0.8
	0.7
	1.2
	5
	2.1
	1.8
	8.2
	1.8
	4.6
	4.4
	9.8
	4.4
	1.7
	1.5
	2.5
	1.7
	2.7
	2.9
	1.9
	2.4
	4.3
	4.3
	1.4
	0.3
	5.2
	3.7
	2.1
	12.3
	12.7
	9.7
	3.3
	7.1
	0.5
	6.1
	57.1
	4.9
	31.7
	4.4
	1.9
	12.8
	1.1
	0.9
	0.3
	4.6
	8.1
	4.9
	0.6
	4.4
	4.5
	35
	2.3
	23
	2
	1.1
	54.2
	0.9
	1.4
	0.4
	1.7
	1
	16.4
	0.9
	0.2
	2.4
	1.2
	1.1
	2
	1.3
	1.2
	7.4
	1.5
	0.9
	1.4
	28.4
	9
	10
	1.2
	4.9
	3.2
	12.5
	3.2
	1.6
	1
	0.5
	1.4
	0.7
	0.7
	0.6
[truncated: 53 more rows]
