# Supplementary material for: The Ndc80 complex bridges two Dam1 complex rings
Source: eLife. 2017 Feb 13;6:e21069. doi: 10.7554/eLife.21069 (PMC5354518; doi:10.7554/eLife.21069)
Supplement: Figure 1—source data 1. — DOI: http://dx.doi.org/10.7554/eLife.21069.004 [file elife-21069-fig1-data1.xlsx]

## Sheet: Figure 1D
Table of residence times (sec) for Figure 1D
wt Ndc80	wt Ndc80 + Dam1	Ndc80 mut A	Ndc80 mut A + Dam1	Ndc80 mut B	Ndc80 mut B + Dam1	Ndc80 mut C	Ndc80 mut C + Dam1
1.6	7	8.9	8.6	0.5	1.2	1.2	1.7
0.9	1.7	0.4	4.6	5.7	2.9	3.8	9.9
9.2	2.4	0.7	0.2	14.6	1.2	0.7	1.2
0.3	2.2	2.3	0.6	1.3	0.5	0.3	2
0.5	0.8	3.5	0.3	1.6	0.7	2.5	2.7
0.2	0.9	0.8	13	0.8	0.6	6.6	1.6
8.4	2.1	0.7	7.7	0.5	11.3	1.6	12.1
2.5	1.1	3.4	6.1	0.3	1.1	2.1	0.8
1.4	0.8	10	0.1	0.8	0.8	0.4	1
3.8	0.9	0.2	4	0.4	1.5	0.4	0.9
0.3	1.1	3.7	23.7	11.1	0.7	1.4	42.1
0.7	1.9	0.1	3.1	0.4	3.2	0.6	4.4
0.5	2.4	6.5	5.3	1.4	10.6	18.1	0.8
0.3	4.1	3.6	0.6	0.3	1	4.8	0.4
0.2	1	1.7	0.4	0.9	1.5	0.5	1.5
0.4	1.4	3.1	1.3	3.4	0.9	0.2	2.3
0.4	4.5	1.5	0.8	1.7	0.5	0.6	3.6
0.2	1.5	1.2	1.4	0.4	0.6	0.9	1.3
0.1	2	2	0.5	23.5	0.8	1.1	0.7
1	0.7	0.4	0.6	2.2	4.1	0.2	0.8
1.1	0.8	0.4	6.8	0.2	0.8	0.3	0.5
0.6	1.3	0.8	4.5	8.2	0.4	0.7	2
1.2	0.8	2.6	0.5	33.3	0.2	10.4	6.2
1.3	0.4	4.1	1.1	0.2	0.3	0.6	19.9
1.2	13.9	1.1	1.7	0.5	5.3	0.5	1.3
0.4	6.6	0.4	4.7	0.5	116.3	6.1	1.8
0.5	5	1	2.3	8	0.8	9.1	2.2
1.8	3.3	0.9	2.3	2.3	10.1	1.4	1.8
2.9	4.8	0.7	0.8	5.4	0.7	1	9.5
3.1	0.7	0.9	0.5	0.5	0.3	2.3	1.1
1.5	0.8	1	8.1	0.8	8.6	0.2	2.1
0.4	1.4	0.4	4.7	0.5	5.3	1.3	0.5
1.6	0.5	2.8	2.1	0.6	2.3	1.6	5.1
0.8	0.7	0.4	0.7	0.8	2	1.2	1
0.3	0.9	9.5	0.6	0.5	18.2	0.5	0.8
0.5	0.6	2.3	2.1	0.5	5	0.4	0.4
0.5	0.6	3.8	3.2	4.3	18.7	0.4	2
24.5	0.3	1.9	1.1	1.1	0.3	0.6	1.1
1.3	1.2	0.5	0.9	1.3	0.2	1.7	16.1
0.6	0.5	6.2	4.3	1.8	0.6	1.5	2.3
1	2.4	0.3	6.7	1.4	13	0.7	0.4
2.1	3.8	0.7	0.6	0.2	11.1	0.4	2.1
2.6	0.7	4.3	1	0.1	1.1	0.1	1.4
1.2	2.4	0.8	42	4	0.8	1.6	0.4
0.6	43.1	0.4	4.8	0.6	0.4	0.9	1.7
0.9	9.5	0.7	1.3	2.4	0.4	1.9	2.5
0.4	33.4	0.7	1.5	1.5	0.6	0.2	0.2
0.8	17.5	0.5	0.5	1.6	1.5	0.6	1
15.4	0.3	3.3	5.2	1	18.8	0.6	1.1
1.9	0.6	0.2	0.9	3	5.4	1	0.7
6.3	6.5	0.3	12.6	0.8	29.7	0.5	4.9
0.4	0.3	0.4	9.7	1.1	1.1	82.3	3
10.4	6.4	0.1	0.9	2.5	4.7	0.4	3.3
3	1	1.2	71.3	1.3	0.9	0.6	1.1
1.5	2	5.3	0.6	3.9	14.5	14	1.2
1.4	2.1	1.6	1	0.4	0.9	2.1	1.9
0.5	21.1	0.3	1.9	3.7	0.8	2.2	1.5
0.7	5.1	1.9	1.5	1.2	0.2	0.9	0.6
0.8	1.4	33.8	24.5	1	1.7	0.7	8
1.1	4.1	0.1	2	8	36.4	3.3	18.2
1.1	14	0.7	19.7	3	0.9	2.6	1.9
1	1.8	0.6	6	4	1.1	0.3	0.7
1.5	1.5	0.7	0.6	1	0.2	0.4	21.9
0.6	3.7	2.2	0.8	0.9	0.3	1.1	1.8
0.5	3.4	2.2	4.1	0.8	1.9	0.5	6.5
0.4	0.5	1.7	1.4	0.7	1.3	1.4	20.7
0.4	10.6	3.7	2.5	1.6	0.9	1.3	1.2
1.8	1	5.4	0.4	1.3	0.1	2.4	0.8
0.6	2.4	4.3	0.4	0.2	1.6	5.6	1.2
0.3	2.3	0.5	0.6	1.2	10.3	2	0.6
0.3	1.2	0.6	0.7	0.8	0.8	4.8	2.2
4.8	3.3	0.3	0.9	5.4	0.3	0.5	2.2
2.3	2.1	0.3	1.3	1	40	0.7	2.8
3.1	0.2	0.6	3.2	1.2	10.1	0.6	1.9
2.5	0.3	0.1	0.6	0.8	0.7	0.1	1.9
0.2	3.6	0.7	1	1.4	2.5	0.9	1.4
0.6	0.9	1	0.4	5.5	1.6	0.3	0.6
0.3	9.8	1.4	21.8	3.3	2.3	1	2.7
0.3	1.5	1.4	6	3.3	0.9	1.2	0.8
1.8	15.4	0.6	4.5	7.2	0.8	0.5	0.8
1.2	11	3.3	23.5	2.2	0.3	0.5	1.2
0.5	7.5	0.4	0.2	10.5	0.5	2.8	1.9
0.8	1.8	0.8	0.4	0.8	0.5	0.4	2.6
1.5	5.1	1.8	0.6	1.2	0.7	1	1.9
6.3	2.9	3.9	1.4	1.5	0.7	0.5	4
0.4	14.2	0.7	3.9	0.5	0.8	2.2	0.8
1.6	3.9	5.7	5.1	0.4	1	1.9	2.4
0.3	8.1	0.4	0.9	8.5	0.3	0.2	1.7
0.9	6.4	1.1	0.5	16.3	1.5	1.1	1.4
10.6	2.3	0.5	0.4	0.4	2.7	0.3	0.7
5.2	1.3	0.9	4.9	0.9	0.6	1.4	15.9
1.4	3.4	0.7	0.8	0.7	2.1	8.7	1.8
0.4	1	2.6	0.4	0.4	1.8	1.6	1
4.5	3.2	0.2	1.4	0.2	1.2	0.5	1.8
1.7	1.1	0.8	2	0.8	1.3	1	1
0.1	0.4	0.5	1.8	0.8	0.5	0.6	0.7
1	8	0.8	0.8	0.4	0.1	1.7	0.6
0.9	22.8	0.6	0.7	0.6	3.5	12.8	9.7
22.3	1.4	1.4	1.7	0.1	3.6	0.5	1.5
2.7	0.7	0.3	0.7	0.6	2.5	6.3	4.9
0.7	0.9	1.1	0.3	2.3	0.2	2.7	3.4
2.6	1.7	7	0.6	0.3	0.9	50.2	1.9
0.2	0.7	0.7	1.4	0.8	0.4	1.2	3.7
0.5	2.1	0.6	0.4	0.5	75.2	0.3	2.2
4.9	1.3	5.9	0.9	0.3	1	3.5	4.5
0.6	7.1	2.5	0.9	0.3	1.5	0.6	1.1
5.5	2.6	10.9	0.9	0.2	1.4	2.2	0.8
1.2	1.7	3.7	15.5	0.7	3.1	2	0.9
3.2	8.1	12.7	0.6	0.3	2.3	8.7	0.7
1.7	0.9	12.6	0.3	0.6	1.3	4.7	1
0.5	16.6	0.2	0.2	5.8	2.9	8	0.6
0.6	0.3	2.6	0.3	0.7	0.9	1.7	0.3
0.8	1.2	11.1	32.1	0.5	0.7	0.7	0.3
11.9	4.5	0.6	0.9	9.4	0.5	1.2	1.2
0.4	0.6	0.1	0.3	0.4	0.7	0.4	1.1
0.9	2.4	2.5	2.7	0.7	1.1	5.5	0.7
0.2	3.7	0.5	2.5	4.9	3.9	4.4	0.3
0.8	0.6	0.6	0.8	1.6	1	0.8	1.8
1	2.1	0.7	1.4	6.9	8.2	0.2	1.1
2.1	5.3	4.3	2.1	0.2	4.5	0.9	3.4
8	8.7	1.4	5	1	0.9	0.7	12.8
0.9	2.7	11.1	0.6	0.6	0.4	0.4	0.8
0.6	1.4	1.4	0.4	1	0.8	0.3	0.6
1.4	1.4	3.1	4.4	0.5	1.5	1.1	0.3
10.3	3	0.4	3.1	0.4	1.1	0.3	0.9
1.7	0.4	3.4	1.4	2.7	2.8	8.5	0.6
4.5	3.7	2.8	1.8	0.2	1.3	5	6.3
0.6	0.9	7.7	2.8	0.5	1.2	0.5	0.4
6.9	0.2	0.9	2.6	0.6	9	1.6	0.8
1.7	2.3	7.8	3.5	1	0.6	1.8	0.6
0.6	0.4	4.4	2.9	0.8	0.3	1.5	10.8
0.4	1.2	0.4	4.4	0.5	1.4	0.5	3.5
0.6	1.2	0.9	5.7	0.6	1.7	0.5	2.9
1.5	0.3	1.6	7.3	0.1	0.4	0.1	3.7
1.1	0.3	0.5	2.6	1.6	0.3	2.5	1.1
4.6	0.3	1	1.6	0.9	2	32.6	0.4
0.3	0.5	1.5	2.5	0.7	6.7	0.3	1
2	1.4	0.8	1	1.2	0.9	17.9	0.5
0.4	1.5	0.3	0.4	0.3	1.4	0.6	0.3
0.7	0.4	1.2	11.8	0.4	2.2	6.7	18.5
0.4	0.3	1.1	0.4	0.8	0.6	1.3	1.6
7.4	0.4	0.7	0.2	0.6	18.8	0.5	0.5
5.6	0.3	0.7	1	0.6	0.6	0.5	0.2
0.4	5	3	0.7	0.7	4.8	1.3	7.5
0.9	2.1	1.2	0.1	0.1	2	8.4	1
0.3	0.2	0.6	7.5	0.3	26.3	0.2	0.9
1	3.8	0.9	3	0.1	0.7	0.8	0.7
0.4	1.2	1	0.2	0.5	0.4	0.5	1
0.5	2.8	4.2	11.3	1.8	3.6	135.5	1.6
1.3	0.4	1.4	0.7	1.1	2.4	0.7	0.7
1.2	0.4	0.3	0.4	1.7	3.2	0.4	0.8
0.3	0.7	1.6	0.4	0.2	4.4	1	5.2
3.3	0.6	1.7	0.5	0.3	1.4	0.3	13.9
2	2.6	3	0.2	2.4	1.2	0.3	2.9
2.1	2	1.7	0.8	0.1	1.7	0.3	0.4
3	0.3	4.4	0.5	5.4	1.2	1	2.2
0.1	2.2	0.6	0.5	2.1	0.8	0.9	1.4
0.5	1.2	1	5.1	0.8	1.1	1.8	0.5
1.1	3.3	5.1	0.6	0.4	2.8	0.9	7.9
0.5	2.2	3.7	1.8	2	2.9	4.8	1.4
0.7	0.2	3.3	6	0.5	0.7	1.2	0.3
0.3	5.5	4.2	1.7	0.2	0.9	1.4	0.4
1.2	0.5	1.9	6.4	0.6	15.6	1.2	10.3
1.1	0.3	0.8	0.4	0.8	4.9	1	0.8
0.9	0.9	7.4	1.3	0.9	6.6	2.5	1.6
0.5	2.5	1	1	0.3	2	1.1	0.8
1.5	2.6	1	0.3	0.1	1.2	0.5	1.8
0.5	2	0.4	0.9	2	4.5	11.8	2.3
0.1	1	0.5	1.4	0.5	0.1	8.2	0.5
0.1	2.6	2.4	0.7	0.7	0.8	0.2	3.6
0.4	0.6	2.1	0.2	0.5	0.2	10.1	4.3
3.4	2.1	1.6	2.2	0.8	7.9	8.4	0.2
0.1	0.5	0.8	0.4	37.1	0.6	0.9	3.1
0.7	7.3	0.3	0.6	0.8	1.6	10.9	6.5
3.4	0.7	0.6	0.2	0.8	0.8	3.6	0.4
2.3	1.9	1	0.4	0.6	3.5	1.7	1.1
1.3	0.6	0.5	0.6	0.6	2.1	1.1	1.7
0.6	5.9	0.3	1.5	0.2	0.4	0.7	6.1
0.3	3.2	7.2	11.8	4	0.8	6.5	2.7
0.6	1.5	0.4	0.6	8.5	0.9	3.7	17.9
0.7	0.7	1	0.5	0.6	0.2	2	5.7
0.2	1.1	0.9	2.4	0.2	11.1	0.5	9.7
0.7	5.3	0.9	0.7	0.5	1	1.4	0.6
3.9	0.9	4.2	4.9	1.1	3.9	2.8	4.4
0.3	0.5	0.3	0.3	3.4	2.1	0.6	0.3
0.1	0.9	3	72.8	4	1.6	0.4	0.5
0.5	2.8	1.1	9.8	3.9	1.6	1.7	0.5
1.3	0.9	19.8	34.6	1	1.4	1.6	2.1
0.3	0.9	0.7	11.2	0.5	1.7	1.8	0.8
0.9	2	0.4	0.8	4.4	0.9	0.4	0.6
0.3	3.4	0.5	0.4	4.2	0.5	0.4	34.6
1.3	0.7	2.6	0.4	2.5	0.7	0.5	7.7
0.3	1.3	1.1	0.5	0.2	1.1	0.6	1.7
0.6	8	0.5	0.8	1	0.5	0.9	9.7
0.4	5.8	0.6	1.1	1.2	0.9	0.4	0.3
9.7	2.4	0.5	0.6	0.8	1.6	1	1.6
0.8	1.2	0.4	0.1	0.4	0.8	0.9	10.2
0.5	2.1	0.8	3.9	0.7	1.3	1	1.6
0.8	4.2	0.2	0.6	0.3	2.6	1.4	0.4
0.4	2.5	0.3	0.3	26.7	0.6	0.6	1.6
0.7	2.2	0.6	0.7	9.2	1.7	0.6	8.4
0.4	4.4	0.8	0.9	29.8	0.5	12.7	43.4
0.8	2	1.2	0.6	0.2	0.4	0.3	0.4
1	3.3	0.8	0.9	1	1.2	0.2	0.2
1.2	10.2	0.2	40.5	1.5	0.3	13.2	0.8
0.7	7.5	1.9	2.2	2.3	1	2	0.3
0.4	1.1	5	0.5	1.9	1.3	0.6	0.6
0.8	1.3	2.5	0.1	1.9	2.5	0.3	0.6
0.6	2.6	0.5	0.6	3.5	0.3	0.2	12.1
0.5	3.5	0.6	1.6	1.1	2.3	6	2.8
2.5	2.4	0.8	1.7	0.8	15.4	25	3.8
5.5	4.2	1.1	13	20.9	0.7	0.8	6.5
5.9	35.8	0.7	0.2	14.6	0.9	0.2	4.1
1.7	1.1	1.5	6.6	2	0.9	0.5	2.4
0.6	2.6	0.8	20.8	0.1	0.9	0.3	0.5
0.1	1.4	0.2	1.4	4.7	1.1	8.4	1.1
0.2	2.6	3.5	1.4	0.6	1.4	4.5	1.2
0.4	7.8	2.8	0.9	0.2	14.6	0.9	0.5
14.1	6.5	0.9	0.1	0.3	4	1.5	8.2
4.1	1.7	2	5.1	0.2	0.8	23.2	0.6
1.9	1.3	0.7	0.3	0.3	0.7	24.6	1.7
2.2	6.7	1	0.9	1.8	0.3	0.6	0.9
1.1	2	1.1	2.9	0.5	0.5	0.5	3.3
0.7	6.6	1.3	4.1	0.1	3.7	0.4	4.2
1.2	5.5	0.8	1.2	0.2	0.6	1.3	1.6
0.1	17.6	0.7	2.2	4	0.8	1	1.4
0.1	1.2	4.9	0.7	1.3	0.9	0.6	1.5
0.7	0.1	0.6	2.3	0.7	0.9	1.8	0.9
0.3	3	0.8	0.6	0.5	9	1.8	12.2
1.6	2.6	0.6	1.6	1.6	1.6	0.1	0.9
0.5	0.7	2.4	2.7	0.9	7.8	1.5	0.5
0.5	1.1	1.2	1.5	2.6	0.3	2.1	0.9
0.6	1.7	3.6	1.1	0.8	1.4	0.7	8.5
0.4	3.9	12.4	31.9	34.2	0.3	0.9	0.3
22.2	37.6	35.4	68.7	3.2	0.5	1.2	3.7
1	7.4	8.2	0.4	1.3	0.5	2.8	0.8
0.7	10.9	0.4	1.5	3	0.7	0.2	4.3
0.5	4.1	0.7	0.2	0.4	0.5	0.7	2.3
0.5	7.8	19.5	0.5	0.2	1.2	0.4	0.5
1.5	17.1	44.5	1	16.7	0.9	12	2.1
0.8	33.8	0.7	3.6	0.7	0.8	2.7	10.8
0.5	4.3	1	3.1	0.7	0.4	1.2	6.7
0.1	1.4	0.9	9.5	4.2	3.2	0.5	1.4
4.8	0.7	0.4	2.4	0.8	5.2	4	0.5
0.2	5.7	2.7	0.5	0.1	1.3	0.1	0.8
0.2	3.7	1.5	8	0.4	6.1	0.4	2
3.6	8.6	0.8	13.3	0.6	1.8	0.3	0.5
0.4	8.8	0.3	0.8	4.3	0.6	0.2	10
0.9	8.6	0.1	2	4	1.1	0.4	1.8
2.9	2.8	1.1	1.4	24.8	1.2	0.5	13.2
1.1	5.9	0.8	7.6	0.4	6.1	0.4	1.2
0.1	1.2	1.9	1.9	0.4	1.1	0.3	1.2
0.5	0.7	3	1.3	0.4	1.2	0.3	11.7
0.4	2.4	0.5	4.6	0.6	0.7	0.2	0.9
0.6	3	0.5	0.9	0.5	0.6	0.6	0.8
2.2	1	1.2	27.7	0.8	0.3	0.9	1.8
0.8	1.5	0.5	3.2	0.3	8.7	0.9	28.5
0.1	9.3	0.3	50.9	32	1.4	0.6	2.4
0.2	18.1	0.5	0.9	1	2.2	0.9	0.5
0.1	4.6	1.8	41.4	1	1.1	1.6	0.9
1.8	1.8	0.9	0.8	1.5	0.6	0.5	15.4
0.9	8.7	1.5	1.3	18.8	5.7	1.1	0.5
0.6	2.1	0.9	3.7	5.6	2.1	0.2	1
5.4	3.5	2.2	0.1	1.5	1.6	7.7	8.9
1.4	6.1	2.4	0.6	0.1	0.8	1.7	7.9
0.7	2.5	4.1	2.2	7	2.4	0.8	3.8
1.8	2.6	1.3	1.4	9.8	2.1	0.1	2.1
3	1	2.6	1.6	0.4	0.7	0.7	1.4
1	0.7	1.1	1.5	0.3	1.2	0.9	1.2
5.9	0.5	5.6	4.1	1	1	2.6	2.6
1.4	2.1	0.5	1.6	9.3	1.9	1.8	2.8
2.6	0.5	0.3	5.5	0.7	1.1	2.1	1.6
11.6	6.1	0.2	0.8	0.6	0.7	2	1.6
1.5	1.4	0.7	7.3	1	0.9	5.6	1.6
2	0.7	1.5	23.2	0.6	15.5	4.2	28.9
7.5	0.5	0.7	0.5	0.4	5.6	0.3	0.7
0.7	0.3	1.5	0.6	1.4	25.8	2.7	0.7
1	10.4	3.9	1	0.4	0.9	0.3	0.4
3.5	1.1	0.5	5.3	0.2	2.1	1.2	0.8
0.4	3.3	3.2	3.1	0.5	1.3	0.3	1.2
4.8	4	9.9	0.3	0.4	1	0.4	1.5
0.6	1.4	0.4	0.3	0.3	1.1	0.4	2.4
0.8	2.3	0.3	1.9	2.6	0.7	1.2	0.4
2	0.6	2.9	0.7	1.4	1.5	0.2	1.1
6.6	0.5	0.8	1	1.1	0.6	0.2	1.1
1.4	0.5	1	2.3	4.5	1.5	1	0.5
1.3	0.1	22.9	0.9	0.8	20.2	1.7	0.7
1.2	0.4	8.1	3.5	1.7	1.4	0.5	0.3
1.6	0.6	1.7	1	0.3	50	0.6	1.3
2.1	9.5	1.7	0.4	0.3	0.9	4.8	0.5
0.6	1.5	0.9	10.6	0.5	0.6	0.4	0.9
0.8	5.4	1.2	2.1	0.9	0.6	0.3	2.8
1.1	2.3	1.9	0.5	0.9	46	1	0.9
8	5.5	1.1	0.3	0.2	30.3	0.7	2.1
2.3	18.9	2.1	1.3	0.2	0.4	0.7	1
1.9	9.7	21	3.2	18.9	3.7	0.8	0.7
0.4	11.9	0.3	0.8	2.1	0.7	0.8	1.8
11.2	11.4	0.8	0.8	0.5	1.2	0.7	0.8
0.5	0.8	20.4	3.1	4.9	0.9	4.3	1.3
2.1	1.5	3.8	0.5	0.1	0.9	6.8	8
0.6	1.2	0.6	1.5	1.2	2.7	0.3	67.7
14.7	1	2.6	11	1.6	2.3	0.6	2.7
6	2.6	9.3	0.5	3.4	0.5	0.9	4.2
0.6	1	2.8	0.5	1.1	3	1.8	3.3
1.6	0.8	9.3	1.6	1.4	0.4	0.5	2.3
0.5	16.2	1.9	0.5	1.2	0.3	0.2	7.7
0.8	1.5	0.8	0.4	1.6	17	0.5	0.7
1.2	4.2	0.3	2.6	9.3	0.4	1.2	1.8
1.2	1	2.6	6.7	0.3	3.7	8.2	0.5
5.4	2.2	0.8	2.6	0.9	1.1	1	0.7
0.5	9.2	2.4	2.3	0.7	4	0.2	1.1
1	2	1.7	0.5	3.9	4	0.5	21.5
0.5	5	0.1	21.5	2.3	3	1.7	1
0.6	3.5	1	0.3	0.7	0.3	1.4	1.1
0.6	5.2	0.8	1.4	0.5	0.6	0.8	1
3.9	2.5	0.6	0.7	0.1	2.5	0.3	0.2
2.7	3	4.6	0.9	0.3	8.5	3.1	3.3
1	0.7	15.5	1	0.3	1.3	1.5	1
0.6	1.7	3.8	51.1	0.8	3.5	0.7	0.7
13.8	40.7	2	0.6	1.6	6.8	0.5	1.7
2	0.8	12.7	2.1	2.7	0.6	1.9	1.1
1.6	0.9	3	1.4	13.2	0.3	0.7	10
1.9	0.9	0.7	0.6	1.2	0.3	1.5	0.7
0.9	1.6	20.8	2.6	2.8	1.1	1.6	1
1	1.2	1.1	0.7	9.6	5.7	0.7	2.5
1.6	2.3	0.1	1.3	0.7	0.6	1.4	1.3
0.5	1.7	1.4	9.5	0.5	1.2	1.1	0.9
0.5	3.9	0.4	11.7	1	0.5	5	1.2
6.4	27.5	0.5	0.6	0.6	16.1	0.5	39.5
5.1	1.3	0.5	0.3	3.8	0.2	0.6	5.2
1.8	0.6	3.3	0.6	1.2	4.5	4.2	60.1
0.6	2	1	1.2	1.2	0.7	0.5	0.8
0.9	1.2	0.8	4.4	0.9	0.6	0.3	1.3
0.4	19.5	0.7	1.7	61.8	1.6	0.2	0.4
0.8	1.5	0.8	0.6	4.6	0.3	0.6	3.5
1	3.1	0.6	1.1	0.2	2.1	0.7	1.2
0.8	0.8	0.4	3.4	0.2	75.5	1.5	2.7
1.3	0.6	0.2	1	0.3	0.5	0.3	2.5
1.8	13.9	0.1	0.5	0.4	3.4	1.7	2
16.9	0.8	2	1.9	5.9	5	0.4	1.3
0.9	0.3	1.7	9.4	0.6	0.2	13.8	0.1
2.4	0.6	0.3	21.5	0.5	1	0.6	1.3
0.3	0.4	1.3	0.7	0.7	2	0.5	2.6
1.3	3.5	0.3	0.7	0.3	3.8	2	2.2
1.6	5.3	0.6	0.2	0.1	0.5	0.6	7.2
1	1.6	0.5	1.1	0.4	0.8	1.6	13.8
3.7	2.9	9.8	0.2	0.7	0.9	0.5	1.3
0.3	2.2	1.1	3	0.5	3.2	0.6	1.6
0.6	1.5	5.3	0.3	0.3	1.4	1.2	3.6
4.6	4.9	14.1	0.3	0.3	0.1	0.7	7.2
1.5	0.7	2	3.6	58.3	0.3	0.8	1.3
2.5	3.4	0.4	1.6	0.3	0.2	0.5	1
1.9	1.6	0.4	5.2	0.5	0.3	0.3	0.9
1.7	15.9	0.4	0.3	0.4	18.3	0.9	3.5
2.1	2	0.2	1.1	0.4	0.6	0.6	0.3
1.4	1	0.2	0.2	0.4	17.2	0.6	0.5
1.5	5	0.2	0.2	0.4	1	0.6	6.1
0.4	14.7	1.1	0.2	0.6	1.3	0.6	0.8
0.6	0.7	0.1	0.2	0.3	0.6	1.5	22.3
12	0.7	0.3	0.3	1.1	0.3	11.7	4.8
2.3	11.5	0.5	0.2	1.3	12	30	2
1.6	9.6	8.3	0.2	0.3	1.4	0.4	1.6
1.3	2.2	0.3	0.3	4.2	0.9	0.3	2.2
4.3	8.1	0.7	0.9	0.8	1.1	0.2	0.9
1.8	4.2	1.6	0.2	0.4	2.6	1.3	3.8
1.4	5.7	1	2.9	0.4	2.1	6	1
2.3	0.7	0.5	2.2	0.4	1.2	0.2	1.4
1.7	2.7	2.4	15.3	0.5	0.1	5.3	0.9
0.9	0.7	2.9	0.7	0.4	2.2	2.7	10.3
6.8	2	2.3	33.4	3.1	0.8	0.8	11.1
2.5	5.5	2.5	3.1	0.4	17.2	3.9	10.1
0.6	0.4	1	17.5	0.4	27.5	1.1	10
0.4	0.5	4	0.8	1.1	1	0.4	0.9
2.8	10	1.2	0.4	3.3	2.4	1.4	0.4
1	13.5	0.5	1.6	4	0.9	5.3	0.4
1.6	1.5	0.4	1.2	3.8	0.6	1.1	0.7
0.5	1	1.6	0.1	58.1	5.2	18	0.4
4.4	3.9	2.1	2.5	5.1	1.2	0.6	0.3
0.2	0.5	1.6	0.2	0.6	0.4	2	13.7
1.9	6.3	0.8	6.4	0.3	1.1	0.8	4.2
1.7	7.6	0.8	0.6	0.3	0.7	0.4	1.3
0.8	0.4	0.2	1.3	3.9	0.3	2.3	23.1
1	1.1	0.4	0.5	0.6	0.5	10.2	1.8
0.7	0.7	0.3	1.8	3.4	1.4	0.8	11.3
0.6	6.2	0.3	0.6	0.7	0.6	2	1.8
1.6	0.3	0.5	1.3	0.3	0.2	0.7	2
1.9	15.7	11.2	0.7	0.7	0.5	0.4	2
0.4	0.6	3.3	0.9	5.5	0.3	2.1	5.4
2.5	2.2	1.3	0.8	0.3	0.3	2.3	0.7
0.7	0.4	1.2	0.7	0.1	0.3	0.6	2.4
0.5	3.9	3.1	2.6	0.8	2	1	3.3
1	0.8	2	11.3	0.5	0.9	1.2	6.9
1.5	0.3	0.3	20.5	0.8	0.7	0.8	2.1
1.1	0.5	4.4	1.4	1.2	0.6	1.3	0.7
0.4	1	0.7	0.5	0.7	2.5	8.7	0.8
1	1.6	0.4	0.8	0.2	6.3	1.7	4
0.5	4.1	0.3	1	9	3.5	0.5	1.1
4.9	2.2	1.2	0.8	0.1	0.4	19	0.6
0.6	0.4	0.9	2.8	0.2	0.5	0.6	0.6
3.2	6.7	1.3	0.1	0.8	0.2	0.6	2.1
2	3.4	0.4	6.9	3.1	0.5	0.5	0.4
6.2	0.6	0.4	6	0.8	1.3	0.6	0.4
0.8	8.3	0.1	0.6	0.4	0.2	11.7	0.6
0.3	0.5	2.1	0.8	5.2	0.7	1.2	3.1
1	3.7	15.5	1.2	0.8	1.9	17.8	0.9
1.3	0.8	1.8	2.2	0.6	1.8	13.5	7.2
2.7	3	0.5	6.8	0.2	2	1	0.5
0.5	1.4	0.1	0.6	0.6	0.5	0.5	4
1.1	4.3	35.7	0.6	0.2	0.3	1.4	1.8
1	5.7	1.4	0.4	0.3	15.3	0.4	1.2
1.4	11	2.8	0.6	1.8	0.2	2.3	1.8
3.8	2.7	2.1	2.4	1	3	1.4	0.6
0.4	2.2	1.3	0.4	0.7	49.5	0.4	1
1	2.8	0.3	0.4	0.4	8.2	2.2	0.1
2.5	1.1	0.7	8.1	1.2	2.6	4.1	5.7
1.4	0.6	5.6	1.9	0.5	12	4.7	17.9
5	3.6	0.2	1	15.8	3.8	3.5	4.5
0.7	0.4	1.7	2.6	4.3	3.4	0.8	36.7
0.4	0.6	1.1	0.7	0.7	5.6	0.5	11.4
1.1	2.5	1.1	0.5	2.6	0.8	0.7	9.8
5	4.5	0.7		2.4	18.7	1.4	2.8
1.5	16.2	0.5		0.2	0.1	1.1	0.7
1.5	2.4	8.8		1.4	0.6	2.3	3.5
0.5	11.2	0.8		1.9	0.5	1	0.7
0.5	8.5	2.4		0.7	0.5	0.2	0.6
0.9	11	1.4		0.8	5	0.6	1
0.7	0.7	14.9		0.3	0.5	0.3	4.3
0.7	4.5	5.7		0.4	13.4	0.4	3
1.6	1.9	0.3		0.4	9.7	14.1	0.3
0.7	4.1	0.9		1.9	0.3	1.5	2.2
1	0.9	1.7		1	0.5	8.6	6.4
6	2.2	9.4		1.1	0.4	1.3	1.9
1.3	1.2	0.5		0.5	0.6	0.5	0.7
0.9	2	0.2		0.2	3.4	1	1.6
1.6	2.7	1.1		2	3.3	0.1	1.1
0.7	1.5	0.7		0.7	2.4	1.1	0.4
2.1	3	0.6		1	0.4	0.7	0.3
0.9	0.9	0.6		0.3	5.9	2.6	0.3
0.8	1.7	1.2		0.4	0.5	0.3	3.9
1	0.5	0.2		0.4	5.6	5.2	8
0.7	2	1.1		0.4	1.1	0.5	1.3
0.3	3.7	0.4		0.2	0.5	0.7	10.9
8	5	1.9		0.8	19.8	0.8	0.9
1.2	4.4	2.5		0.8	2.1	8.2	1.9
0.7	4.5	0.9		0.1	0.6	0.6	0.5
3.9	10.2	3.6		0.3	0.3	7.3	0.3
3.7	1.8	1.9		9.6	1.3	0.2	8.9
1.7	1.8	0.4		9.7	4.3	0.5	0.5
9	2.7	0.1		2.4	0.6	3.3	17
18.2	11.8	0.6		8.4	0.6	0.4	2.5
1.1	23.6	1.2		0.4	0.6	14	0.3
1.6	5.8	1.4		0.4	0.5	1.2	0.4
16	9.5	0.4		0.5	10	7.8	2.3
0.6	2.4	1.3		1	0.6	5	2.1
0.9	3.2	0.4		0.4	0.9	1.6	13.2
1.5	0.7	0.6		0.2	0.6	5.8	3.5
2.8	3.1	22.2		2.1	0.5	0.6	2.8
0.9	0.5			0.1	0.2	35.5	0.5
0.4	9.3			0.5	0.4	3.2	6
0.9	3.8			0.7	1.1	1.3	0.9
0.5	0.6			3.7	0.5	0.3	0.4
0.7	0.5			3.9	0.3	0.5	0.3
1.1	13.1			1.8	1	2	0.4
1.5	11.8			5	0.2	13.4	0.4
0.9	0.3			0.7	0.2	7.2	1
0.8	0.3			11.1	5.1	1.6	1.5
0.6	0.5			12.4	0.9	1.5	1.2
0.5	0.9			14.3	0.7	1	0.5
0.6	0.9			0.5	0.6	3.9	1
0.1	1.1			2.9	0.5	2.5	0.5
0.3	2.7			0.6	2.7	1.1	1.5
0.3	8.5			5.3	0.1	1.5	3.1
0.2	0.7			1.6	1.1	0.7	0.7
25.4	5.5			1.3	2	1.1	4.3
1.7	12.6			0.4	0.5	7.2	0.5
1.6	13.1			0.6	0.3	0.3	1.2
5.8	7.7			0.3	0.4	1.4	0.4
4.3	7.7			0.2	0.4	1.3	0.7
4.5	1.1			0.3	16.7	0.1	0.5
0.6	3.3			5.8	0.8	7	0.5
0.8	2.2			0.2	0.5	1.1	0.4
0.5	0.5			0.1	3.9	1.1	1.8
0.7	1.3			0.2	0.3	1.4	2.6
4.5	1.4			0.2	0.1	9	1.1
0.8	7			0.5	0.1	4.4	14.8
1.7	3.8			1.9	0.8	11.4	1
0.3	3.2			0.2	0.4	0.6	1.7
0.9	0.8			1.4	0.3	0.8	2.8
8.9	2.3			3	0.6	5.6	2.6
2.1	6.3			1.2	0.4	0.5	4.9
0.1	1.4			1.1	0.9	0.6	0.6
4.1	0.8			1.5	1.3	1.6	0.4
0.3	3.4			0.2	0.9	1.8	30.9
3	3.8			10.5	0.9	0.6	4.1
0.5	2			0.2	8.5	0.6	3.8
0.5	11.2			0.4	2.7	0.4	1.5
2.2	18.2			0.3	1.7	0.4	1.3
2.4	6.1			0.8	15	0.2	0.4
4.4	2.4			0.6	2.2	0.1	2.6
3	2.8			0.8	2.8	0.9	0.7
2.1	4.1			0.1	2.8	0.7	0.1
0.8	7.9			3.8	0.8	1	0.7
4.4	2.9			0.7	0.3	1	1.1
0.7	1.7			1.9	0.3	0.9	1.3
6.3	12.2			0.6	0.3	2.6	0.9
1.5	12			0.9	20.6	0.8	0.6
9.5	3.4			0.8	2.9	2.9	1.2
1.6	3.3			1.2	0.5	1.4	0.4
2.2	3.2			0.8	0.2	2	0.9
1.4	2			2.1	1	1	0.5
0.2	1.5			0.4	0.5	1.9	1
22.2	2.4			0.4	0.7	5.4	0.4
0.7	4.9			11.9	0.7	12.3	0.5
3.8	0.3			0.8	0.1	0.9	3.1
1	5.5			0.9	2.1	15.2	1.8
1.8	17			0.4	1.3	0.8	43.6
1.1	1.9			0.3	0.9	0.4	48.6
0.7	2.9			3.7	0.6	0.8	2
0.6	0.5			9.9	0.3	0.5	1.4
1.2	0.6			1.2	0.9	0.3	1.6
0.7	1.2			2.5	0.1	12.2	0.6
2.1	2.3			0.5	0.9	1.2	0.3
6	0.4			0.4	0.3	1	9.5
2.8	3.5			1.1	0.1	2.1	2.4
0.8	2.3			0.6	0.7	5.7	4.3
0.4	2.4			0.2	1.6	1.4	10.8
2	2.3			0.8	0.2	1.1	0.8
1.7	1.3			0.4	2.4	0.7	3.1
1.4	8.8			0.3	0.4	9.4	0.3
0.7	22.5			1.3	0.8	0.3	0.7
0.5	2.5			1	1.2	0.8	4.4
9.6	0.9			10.1	0.7	3.7	12.4
1.3	1.3			1.2	0.3	0.6	2.2
2	11.4			0.5	0.8	1.1	0.6
1.5	1.3			0.6	0.2	0.2	0.6
0.8	2.1			1	0.9	0.1	0.5
0.9	3.2			0.3	0.5	0.7	0.4
0.1	2.6			0.1	0.9	1.9	16.2
0.2	3.4			8.4	6.3	0.2	2.6
1.3	1.6			0.7	1.3	0.1	35.2
14.2	0.7			0.8	1.1	0.3	69
2.1	1.1			2	0.2	2.9	2.8
2.9	1.6			3.4	0.4	0.6	5.1
1	2.7			0.8	1	0.1	16.8
0.6	2.2			0.5	0.5	0.5	14.2
0.7	25.3			1.2	17.5	0.5	1.3
1	4.7			0.5	1.2	1.4	0.5
1.1	0.6			1.3	0.7	2.3	0.7
7.4	2.5			1.1	0.2	0.4	0.8
0.9	0.8			0.5	0.5	3	31.8
4	4.7			0.7	1.4	0.4	1.3
2.3	1.2			7.6	0.7	0.6	0.9
1	0.7			10.1	0.3	1.1	1.7
2.3	0.8			46.4	0.5	4	2.3
0.7	7.8			0.2	0.3	2.2	1.1
0.8	21.7			0.4	0.8	0.3	6.4
0.5	2.7			0.2	1.5	3.9	7.8
1.7	3.2			0.3	0.3	1.7	3.8
0.3	0.4			0.1	0.8	0.6	1
1.1	5.4			1.7	1.8	0.8	2.8
0.2	0.6			0.2	1	0.3	3.2
2.1	0.8			0.2	0.1	0.3	8.1
14.4	5.2			6.4	13.7	0.1	1.1
2.5	1.1			1	0.3	0.3	0.8
1.2	0.7			3.3	1.6	1.4	1.4
0.6	0.6			0.2	0.8	0.4	1.2
1.6	2.9			0.6	0.3	2.6	0.9
5.4	3.7			0.8	0.3	0.5	0.3
14.7	1.8			1.2	0.4	0.7	0.3
5.6	4.7			0.3	6.5	0.3	0.6
0.5	11.9			0.5	0.2	0.2	42.6
3.6	2.9			85.3	0.3	0.8	7.6
2.3	6.1			47.8	16.4	0.2	1.9
1	0.2			1.8	7.3	0.3	5.9
1.3	0.7			7.4	12.4	0.5	0.9
1.1	2.1			2.9	9.5	2.1	0.4
1.8	1.3			0.5	4.8	0.2	6.4
0.9	41.4			0.3	3	1.4	8.1
0.4	11			1.7	0.4	0.5	1.4
0.4	8.3			0.2	49	0.7	5.5
1.9	2			1	1.9	0.9	1.5
1	0.9			1.3	0.7	0.5	0.4
0.3	1.1			0.3	0.9	0.3	0.7
0.2	1.3			3.8	0.5	0.4	1.3
0.2	1.9			3	0.5	1.1	3.8
1.8	3.6			0.5	1.4	8.8	30.9
1.3	4.9			6.7	0.3	0.2	1.7
2.5	0.8			4.4	1.5	0.1	4.7
1.4	0.7			2.3	1.2	3.6	0.7
0.6	1.9			0.9	0.3	0.7	3.2
1.3	0.6			0.8	7	0.9	0.9
0.6	1.8			1.3	1.9	1.6	1.3
6.8	3.7			0.6	11.5	0.2	1.6
0.9	1.7			5.4	0.9	0.3	2.1
1	1.5			0.7	0.6	2	3.1
0.9	0.7			0.2	1	0.2	0.5
1	0.7			2.8	1.3	4.3	0.3
0.4	1			1.2	1.3	0.9	0.6
0.4	0.9			6.2	7.9	0.8	3.1
0.7	2.3			0.8	0.8	9	0.4
0.6	0.5			0.4	2	1.7	0.4
1.6	0.4			0.8	10.8	1.3	7.9
1.1	0.4			0.9	0.4	5.7	4.8
1.7	18.3			3.2	1.6	0.3	1.2
0.7	2.8			0.6	2.2	0.5	4.6
3.3	1.3			1.7	2.2	0.4	21.5
1	0.9			0.8	0.9	1.4	0.7
1.1	1.5			1.8	4.7	0.7	9.4
1	3.7			3.6	0.7	0.9	0.5
4.3	9			0.6	0.6	0.2	0.1
2.9	25.3			4	0.7	1.5	0.3
8.2	8.5			3.1	8.3	10.8	0.3
1.4	1.3			0.4	0.9	1.5	1.4
1.7	3.3			0.8	69.7	1	1.5
5.6	7.2			29	0.2	1.1	0.7
1.3	1.9			0.6	15.5	1	21.3
1.2	0.5			2.7	2.6	4.6	8.8
1.3	1.6			0.2	0.2	0.6	6.5
19.1	1.4			1.4	0.8	3.1	2.7
1.4	1.4			4.3	0.9	1	1.6
1.6	7.7			0.5	2.1	0.3	0.3
0.7	4.9			1.7	0.4	1.3	8.2
0.2	10.9			0.6	0.2	0.6	1.9
2.5	1.3			3	0.9	0.7	0.6
1.3	5.4			1.6	0.6	0.7	3.1
1.9	2.8			0.1	0.5	3.3	1.6
0.9	1.7			0.5	34	0.4	13.5
1.5	0.6			0.2		1.5	2.6
1.5	1.9			3.4		1.9	3
0.5	2.3			1.7		31.7	1.7
0.7	2.2			0.7		2.4	0.4
1.1	1.7			0.6		4.5	0.6
1.2	1.6			0.5		1.1	3.3
1.3	8.4			0.2		1	1.5
2.5	0.9			1.4		0.7	0.6
1.1	1			0.1		0.2	0.5
0.9	1.7			5.7		0.3	6.6
1.8	2.2			10.4		0.4	0.5
0.7	1.4			0.6		0.8	1.4
1.2	6.2			0.5		20.7	0.3
0.7	0.6			0.1		0.6	0.7
9.7	1.4			5		1.9	1.3
0.7	3.7			3.9		1.2	0.8
2.3	0.8			0.4		0.7	0.5
0.7	0.5			0.6		0.3	0.4
0.8	0.5			1.2		0.1	3.8
0.5	0.9			0.5		1.1	14.7
1.3	0.7			0.4		0.2	1.9
0.5	0.7			6.6		0.5	1.3
0.4	3.6			0.2		0.8	1
0.1	3			1.3		0.5	7.1
0.4	2.9			7.5		0.2	21.8
0.4	0.4			0.4		0.1	6.8
0.5	1.1			3.9		1	2.3
0.7	1.8			4.4		0.6	8.8
3.4	9.6			28.8		0.1	1.8
0.6	0.8			8.6		3.4	0.5
1.3	1.7			1.8		2	0.4
5.9	1.8			1.9		0.4	2.9
56.2	17.8			13.4		0.6	14.4
3.1	0.9			0.5		6.9	0.9
3.1	0.3			6.2		0.6	1.1
1.2	5			15.5		7	12.5
1.6	0.4			18.2		2.5	10.9
1	1.3			8.5		0.1	2.4
0.7	1.3			11.9			2.6
1.1	3.3			4.1			1
0.9	6			0.5			8.5
1	7.3			0.9			0.9
4.8	6.2			1.2			1.4
1.6	2.5			1			3.8
2.5	0.6			0.4			6.2
2.4	8			1			0.7
1	2.8			2.6			72.4
1.2	5.3			1.2			0.7
1.1	5.2			0.9			0.2
0.6	7.2			1.1			0.2
5.8	4.8			1.8			26.8
4	1.2			0.3			12
1.5	0.8			10.7			0.9
0.3	0.9			4.4			3.4
1.8	4.2			2.1			0.4
0.6	1.3			0.5			0.4
1.6	2			0.6			1
0.6	2.1			0.5			1.3
0.5	8.1			1			0.3
0.7	12.6			2			0.3
0.8	4.8			3			0.5
0.9	2.3			0.2			0.4
0.9	2.8			0.7			1.1
3.2	3.7			0.3			2.7
0.8	3.6			0.6			0.2
1.4	4.7			0.2			0.3
9.3	1.9			3			0.4
3.6	2.9			4.6			53.3
1.7	1.1			4.5			1.6
0.7	1.7			1.3			1.4
29.2	0.8			0.3			1
1	0.8			0.3			5.7
0.2	7			1.8			1.1
0.8	8.6			0.7			0.8
9.4	4.5			27.5			0.4
9.6	0.9			0.5			0.6
3.6	1.5			7			1
1.3	2.7			8			0.6
0.8	2			12.2			1.2
20.2	1.2			0.1			1.2
0.9	1.6			0.4			2.3
2.4	3			0.7			2.9
0.8	1.7			2			14.3
3.2	5.2			0.4			1.7
1.9	8.2			2.5			1.9
2	1.1			5.1			1
1	1.5			0.4			2.4
10.9	0.7			0.7			0.5
2.3	1.2			0.2			7.9
1.1	1.9			0.5			0.8
1.9	6.1			0.4			8.6
1	6.5			10.5			0.6
0.8	1.5			0.5			0.2
0.7	6.8			0.6			2.7
0.7	1.8			0.1			13.4
1.6	3.5			0.1			0.8
0.5	2.5			0.4			0.6
3.7	1			1.9			0.8
0.5	0.8			21.5			1.6
5.8	0.3			0.7			1.8
1	0.7			1.5			0.4
0.3	9.8			9.5			3.1
0.4	1.5			0.7			1.1
1	31.3			0.5			3.4
1.2	4.3			14.6			8.4
0.4	2.7			6.4			1.3
1.6	8.2			0.5			0.8
4.1	6.9			0.6			0.3
3.2	1.7			0.7			14.5
2.3	1.3			0.7			10.8
0.5	23.4			1.3			4.1
2.7	4.6			4.8			0.6
1.8	9.4			0.5			0.4
0.5	5.3			0.3			3.6
2	0.6			0.5			0.5
1.6	11.4			1.8			0.3
2.4	5.2			5.9			2.1
0.8	1.8			7.2			0.4
1.3	0.4			0.3			22
7.1	1.1			0.1			0.9
2.1	16.7			0.3			0.6
6.8	3.2			9.2			0.2
1	4.6			2.4			0.3
0.9	0.9			0.8			0.1
0.6	0.9			0.4			1.1
0.5	3			0.2			0.2
2.8	2.6			0.9			0.9
0.5	2.6			0.5			41.7
0.3	1.8			1			12.1
0.5	13.9			0.2			15.8
0.6	0.8			0.2			2.6
0.8	27.6			0.4			4.8
14.7	11.2			2.6			0.5
5.1	1			0.3			0.7
2	1.7			0.6			1.7
0.6	2.2			0.2			0.5
6.8	0.5			0.3			0.3
0.8	0.7			0.5			3.8
2.7	1.5			0.4			2.6
0.8	1.8			0.4			2.5
0.7	1.1			0.2			1.4
0.7	22.6			0.4			1
1.1	1.5			1.8			15.9
0.2	0.7			1.5			6
1.5	1.1			0.7			1.1
1.5	2			0.1			1
4.8	0.4			0.7			0.6
2.8	0.9			0.7			4.1
1.8	7.7			2.7			2.7
2.5	3			1.8			8.9
0.8	8.3			0.2			5.6
3.9	1.7			0.1			10.6
0.4	1.5			1.2			1.4
0.7	0.8			5.1			0.5
0.5	1.3			0.4			1
1.2	5			0.3			0.2
0.4	1.4			0.4			4.4
1	2.3			2.3			0.5
0.8	0.7			0.4			1.4
1.8	0.5			0.4			1.4
1.6	0.5			0.4			2.6
6	0.5			3.6			0.9
1.1	0.5			0.2			1.3
1	0.5			0.3			1.1
2.4	0.5			0.2			3.6
2.7	0.4			0.2			0.7
12.9	8			0.5			1.5
1	4.6			0.5			1.3
10.3	2.4			0.3			1.3
2.2	2.2			1			6.6
1.2	4.3			1.1			6.6
1.3	1.8			1.3			7.7
14.6	0.9			1.4			11.6
2.5	1.3			1.3			1.3
0.6	1.5			0.5			1.3
0.3	6.4			0.4			1.4
3.2	3.9			0.4			1.4
2.6	2.4			0.4			0.4
0.6	6.9			0.2			2.2
0.4	10.6			1			1.6
2.2	1.4			0.4			0.7
6.8	2.3			0.2			0.4
4.4	12			11.5			0.5
1.7	16.2			0.2			15.6
3.7	1.3			1			4.8
5.4	3.4			0.3			2.5
0.8	5.3			0.3			0.8
0.8	1.2			0.3			0.9
0.8	0.4			0.5			1.5
18.8	0.8			0.1			0.5
27.9	3.2			0.3			2.9
0.8	0.7			1			0.7
0.3	0.8			0.3			1.2
0.7	4.2			0.1			1.1
0.7	8.7			1.1			2.2
0.7	0.5			0.2			0.7
1.6	4.3			2.1			1.2
1.7	0.7			0.2			1.2
0.7	4.2			0.4			0.4
5.6	2.1			0.9			1
4.6	9.4			0.4			2.9
1.5	2.1			0.2			2.3
0.8	1.2			0.3			3.7
0.8	18			0.6			0.5
1.8	16.8			4.7			6.5
5	5.1			0.3			6.2
6.7	14			0.4			39.9
1.3	27.1			0.2			1.6
0.7	2.4			0.1			1.4
0.9	43.3			0.6			15.6
2.4	9.4			0.4			1.2
0.9	2.7			1.5			8.6
2	10.5			1.3			1.1
2.2	2.4			0.8			3.5
2	3.3			0.3			1.4
18.1	0.9			0.6			0.6
1.6	0.4			1.7			0.8
2.4	1.4			0.7			1.9
1.2	2			1			0.5
1.2	1.6			1.2			10.4
1.4	1.8			0.7			1.5
13.3	14.8			0.4			6.6
19.8	1.1			0.5			19.8
52.1	1.2			0.8			7.7
0.5	6.6			0.6			2.8
0.2	4.4			0.2			3.2
0.4	1.6			3.6			0.8
2.1	20.1			0.9			1
0.7	16			0.2			5.7
0.8	10			0.6			0.3
1.4	24.2			0.5			1.5
0.9	1.9			2.7			0.8
2.3	15.3			0.5			1
2.1	10.7			1.1			0.4
4.9	7			0.3			0.2
0.5	7.1			0.8			1
0.5	4.8			0.4			2.5
0.4	8.6			2			0.5
2.9	8.8			4.1			1.3
0.9	13.3			1.8			0.2
4.1	0.8			27.2			0.4
0.9	2			5.6			1
0.7	3.8			0.5			1
2	4.6			0.4			5.5
1	8.3			0.6			2.8
1.9	1.7			25			3.1
0.6	0.9						8.1
0.5	2.7						18.4
0.4	0.9						0.7
0.2	1.8						0.4
3.7	0.8						0.4
1.9	0.6						0.3
0.8	0.7						0.1
1.5	0.5						0.3
4.8	2.5						0.6
17.8	0.5						2.2
0.8	0.4						2.9
12.5	0.7						2.3
0.6	0.6						4.3
0.6	0.5						1.1
0.4	2.5						1.9
0.2	3.2						0.4
4.8	1.8						0.4
1.9	1.2						0.5
0.4	5.8						7.4
0.8	11.4						1.1
0.7	32.6						2.5
1.1	4						1.3
3	3.3						0.4
0.6	2.8						1.5
4	2.3						0.7
1.4	12						5.4
1.2	1						6.4
2.1	8.2						5.9
0.9	1.5						5.2
4.4	0.5						0.8
0.7	1.2						3.5
0.3	4.6						12.3
0.2	0.3						8.6
0.1	0.5						1.3
0.9	5.3						0.8
0.9	1.1						1.2
11.7	15.9						12.7
1.4	9.2						2.1
0.5	2.2						0.5
1.8	3.2						0.2
0.7	2.7						0.8
1.2	3.8						2.7
0.7	18.9						0.5
0.3	18.6						0.2
4.5	8.3						11.6
0.9	4.4						0.4
1.6	1.7						2.3
0.5	1						0.4
0.1	1						0.6
0.6	1						11.9
1.7	7.3						0.7
1	12.2						11.3
0.4	1						1.9
3.6	14.7						2.7
0.4	0.8						3.4
1	4.3						1
0.5	7.1						34
1.6	6.7						7.5
4.4	2.3						1
0.8	3.9						2.3
0.4	6.3						0.5
0.7	1.2						4.6
0.5	0.6						0.3
2.4	6.9						0.5
1	1.1						0.4
1.6	1.8						9.9
0.6	0.7						17.6
2.7	1.2						0.5
6.3	1						1.1
1.4	5.2						0.6
0.5	16						3.2
1.6	2.5						7.4
0.9	1						1.1
0.6	1						0.5
16.6	1.9						2
1.8	1.3						1
1.9	0.4						0.2
1.3	0.8						7.1
25.6	0.6						0.1
2.6	0.5						0.4
1.6	0.4						0.4
10.5	0.6						4.2
0.5	1.8						1.6
1.2	5.9						2.3
1.1	4.2						0.1
0.9	1						3.7
2.2	0.4						11.9
0.6	6.1						3.6
0.7	1.1						1.2
0.7	9.2						5
0.8	2.5						0.7
12.1	15.2						2.1
1.4	31.7						19.7
1.3	9.4						1.4
0.6	6.2						3.3
0.2	0.6						1.7
0.7	2.6						0.8
0.2	1.8						0.6
0.4	5.2						0.6
0.4	0.9						5.5
0.6	1.2						4.7
4	1						5.4
2.9	16						1.9
0.7	1.4						2.1
9	5.5						0.7
3.3	4.4						28.2
0.6	1.5						0.9
0.5	1.3						8.4
0.9	1.5						4.5
46.7	4.6						1.2
58.5	4.2						4.3
0.7	6.6						0.1
1.1	5.1						0.2
2.8	29.4
14.3	24.7
1.2	2
1	3.9
0.5	1.1
1	9.5
1	2.2
1.1	6.1
1.6	13.2
1.8	1.3
1.3	1.5
0.2	2.8
13	1.3
0.3	3.4
5.6	1.5
0.6	0.8
10	0.8
0.4	3
0.9	0.7
0.7	2.3
1.6	0.9
0.4	1.3
1.4	15.3
0.3	1.5
0.5	0.8
0.7	1.1
0.4	10.9
0.2	8.9
0.7	3.5
0.8	4.8
0.8	1.9
0.6	0.4
2.2	5.9
5.3	6.1
2.9	9.2
0.7	2.5
0.2	1.7
0.5	0.7
0.4	2.4
1.3	0.9
1	0.6
0.7	1.3
5.6	7.4
2.2	3.2
9.2	18.3
2.2	4
3	3.6
8.3	16.4
3.6	2.7
0.4	4.1
3.9	1.3
2.3	14.2
0.7	8.1
0.4	3.6
1.1	12.8
5.3	1.2
1	0.4
0.8	0.6
1.7	1.1
12.4	0.7
1.6	0.5
1.1	1.2
1.5	13.4
1.1	17.3
0.6	2.2
1.1	14.2
0.5	4.1
1.8	2.5
0.9	21.2
0.6	10.5
1.8	1.3
0.8	1.7
2.8	1.4
0.6	1.1
0.4	8.5
4.6	0.7
4.2	0.8
0.8	1
0.7	0.5
1.3	5.6
0.6	54
1.9	4
0.6	2.8
0.1	6.2
1.9	2.2
0.3	11.4
2.3	33.1
1.7	1.5
1.7	1.1
2.4	15.4
0.9	2
5.7	2.5
9.2	5.7
2	5
0.4	10
5.4	6.8
0.8	2.6
0.1	1.4
2	4.8
5.7	4.3
1.2	3.8
2.5	1.7
3.2	21.6
1.1	1.8
1.2	0.1
1.5	0.9
0.4	7.4
0.9	1.8
0.1	2.7
3.9	0.9
1.4	1.5
4.9	5.7
1.9	4.1
2.2	9.4
2.1	44.5
1.3	28.6
1.7	2.5
1.2	12.2
0.3	2.8
1.6	1
23.3	0.8
1.9	0.8
2	2.7
0.2	16.7
0.3	11
4.8	5.5
0.8	1.7
4.8	0.6
0.7	8.3
1.2	2.9
3.3	0.3
2.3	4.8
0.4	20.1
0.2	1.5
0.5	8.1
0.3	0.5
0.9	3.5
0.5	9.4
8.8	76.6
3.6	6.3
1	4.4
2.2	5
3.8	1.4
1.5	2.6
1.9	1.1
9.3	32.9
4.8	7.5
10.6	7.6
1.2	1.5
2.3	0.9
6.7	0.4
1.6	7
2.3	1.4
4.1	2.3
0.9	1
2.4	10.6
8.7	38.3
1.6	0.9
2	36.8
4.3	1.5
0.7	4.1
0.5	3.3
0.7	0.5
2.5	30
1.8	12.5
3.7	26
2.3	4.1
12	2.2
2.4	0.9
6.3	0.5
1.7	20.8
3.4	12.2
0.4	1.1
8.7	2.1
2.4	5
1.1	5.2
0.6	1.3
1.7	31.4
1.4	7
1.3	24.9
0.3	0.3
1.5	1.6
0.4	1.3
0.4	0.4
0.5	0.3
1.3	1
1.5	20.2
0.9	8.4
1	1.3
0.9	5.1
0.5	7.3
2.4	2.4
3.1	0.8
0.8	3
1.4	3.6
0.2	3.1
6	3.4
0.7	24
0.4	7.1
5	6
1.1	5.9
1	23.5
1.2	9.4
1.9	7.2
0.4	11.1
0.3	6.9
0.3	2.3
16.1	3
0.5	7.6
0.6	25.4
0.3	2
6.7	5.8
1.1	7.9
0.8	9.3
0.4	1.9
5.4	0.9
1.9	0.9
3	0.9
0.6	7.3
1.1	0.8
4.3	0.5
5.5	4.2
1.5	0.7
11.1	0.7
2.5	13.3
1.8	5.7
4.6	9.1
2.2	7.6
0.5	10.3
14	11.4
1.4	15.2
0.1	2.6
1.7	18.1
1.7	6.5
1.2	0.5
1.9	1.5
5.7	0.7
0.4	0.8
1	9.3
	13.5
	4.9
	2.1
	2.8
	1.2
	28.6
	0.8
	1.7
	3.1
	2
	14.1
	2.1
	1.1
	2
	17.9
	13.5
	23.2
	1.9
	9.3
	12.2
	1.9
	1.4
	1.9
	0.8
	2.9
	0.8
	1.4
	1.4
	4.3
	4.3
	4.9
	2
	0.7
	16.7
	3.4
	0.5
	20.8
	0.6
	1
	0.5
	0.6
	0.7
	0.6
	5
	0.6
	1.2
	1.9
	0.7
	1.3
	0.4
	8.1
	0.6
	5.1
	2.3
	5.2
	11.2
	0.4
	2.7
	4.4
	0.6
	0.8
	0.5
	11.3
	0.5
	4.9
	2.3
	1.9
	2.2
	4.4
	1
	0.5
	0.4
	63.5
	0.6
	0.7
	0.5
	2.1
	1.5
	4.8
	4
	0.4
	13.4
	3.6
	4.2
	23.4
	0.8
	4.1
	0.6
	8.9
	1.1
	1.3
	2.5
	0.9
	0.7
	3.9
	0.6
	3
	7.9
	1.2
	0.6
	3.5
	0.9
	0.2
	40.1
	0.8
	9.1
	4.8
	3.6
	0.8
	3.7
	1.6
	5.6
	10.1
	0.4
	5.3
	0.8
	2.5
	1.8
	1.9
	0.2
	0.9
	0.7
	2.9
	28.4
	4.9
	0.6
	1.6
	2.8
	1
	0.4
	33.3
	9.4
	5.1
	1.8
	5.5
	35.6
	2.2
	0.6
	2
	0.4
	3.4
	0.4
	0.4
	0.9
	12.1
	1.2
	0.8
	61.2
	8.4
	3.1
	3.8
	9.6
	1.8
	5.1
	1.2
	25.3
	6.5
	0.7
	1.3
	1.8
	1.1
	4.2
	0.6
	3
	5.3
	1.9
	2
	4.6
	2
	0.4
	0.3
	1.9
	5.4
	1.7
	5.3
	1.1
	1.3
	3.6
	0.9
	0.5
	5.1
	8.1
	14.7
	1.2
	0.3
	0.4
	2.6
	0.5
	1
	15.8
	4.2
	2.8
	3
	2.1
	1.5
	31.9
	9.8
	26.8
	0.4
	7.8
	2.3
	1.8
	0.9
	0.5
	0.4
	1
	0.5
	6
	1.5
	20.2
	0.9
	0.5
	1
	2.3
	6.3
	5.9
	1.6
	0.3
	0.7
	2.5
	6.4
	0.7
	6.2
	0.8
	24.4
	1.4
	1.3
	5.9
	42.1
	2.4
	1.2
	0.1
	1.8
	1
	18.3
	1.9
	7.6
	1.9
	3.6
	2.6
	1.6
	11
	1.3
	0.7
	0.9
	9.4
	5.8
	14.4
	3.6
	2.6
	6.6
	28.5
	12.4
	0.7
	1.1
	0.8
	12.8
	1.7
	3.3
	0.8
	0.6
	3.9
	1.2
	0.6
	8.3
	26
	1.3
	2.5
	1.9
	4.9
	2
	1.9
	0.5
	1.8
	1
	3.4
	5.3
	0.5
	6.8
	1.5
	1.1
	0.5
	1.3
	0.9
	1.6
	6.5
	3.3
	2.4
	0.3
	12.5
	1.8
	3.4
	0.9
	6.4
	11.5
	24.9
	0.4
	42.1
	9.3
	1.5
	15.6
	1.5
	0.7
	1.5
	4.7
	1.7
	1.3
	0.8
	0.6
	3.7
	23.4
	5.1
	35.9
	31.2
	4.3
	5.1
	6.4
	9
	8.6
	2.4
	0.6
	1.7
	2.1
	30.1
	2.2
	3.4
	8.1
	3.1
	0.4
	0.3
	10
	2.3
	3.9
	10.1
	23.1
	9.9
	10.1
	3.7
	24.5
	6.9
	1.1
	1.2
	0.6
	7
	1.1
	5.1
	6.2
	3.9
	2.6
	2.1
	1
	1.5
	1.1
	3.7
	16.5
	24.3
	1.3
	6.2
	13.8
	2.8
	0.8
	2.3
	1.1
	0.9
	2.4
	1.9
	9
	1.9
	2.2
	10.6
	4.3
	11.8
	4.3
	3.3
	1.6
	20.6
	1
	1.9
	1.1
	17.9
	8.4
	7.2
	1.2
	2.2
	0.5
	7.2
	10.8
	4.9
	4.2
	13.6
	0.4
	1
	0.4
	0.3
	0.1
	0.6
	0.7
	0.4
	1.1
	69.2
	4.6
	3.4
	3
	5.1
	14.2
	0.6
	0.8
	0.9
	3.2
	1.2
	5.9
	2
	0.5
	2.1
	2.6
	12
	3
	13.9
	1
	0.4
	0.1
	13.6
	2
	16.8
	21.8
	18.2
	1.4
	3.4
	38.7
	2.4
	2.7
	1
	9.2
	1.9
	2.2
	0.5
	2.4
	0.5
	0.6
	6.4
	0.4
	19
	1.7
	4
	2.9
	0.7
	1.4
	3
	7
	0.6
	0.7
	0.8
	4
	2.6
	1.7
	1.3
	12.4
	35.2
	5.2
	19.6
	7.9
	3.1
	4.2
	5.7
	0.2
	0.4
	0.2
	0.5
	9.2
	5.5
	0.5
	0.6
	0.6
	0.5
	2.3
	0.8
	0.1
	3.4
	0.5
	0.2
	3.7
	5
	4.4
	4
	3
	3.9
	9.7
	19.2
	6.4
	0.9
	1.5
	1.2
	0.9
	0.4
	4.1
	1.9
	0.8
	0.5
	13.8
	52.2
	9.7
	6.5
	1.3
	21.7
	7.2
	1.6
	0.6
	14.1
	18.9
	9
	0.8
	0.6
	7.2
	2.4
	10.8
	1.4
	0.1
	3.6
	7.9
	5.3
	1.9
	1.6
	4.2
	7.5
	1.4
	0.3
	0.6
	8.5
	8
	1.5
	25.8
	2.9
	0.8
	0.7
	2.4
	1.6
	2.9
	2.2
	19.3
	11.2
	6.7
	4.4
	1.5
	10.4
	2.4
	0.6
	0.6
	0.6
	1.1
	0.6
	2.3
	2.2
	1.7
	0.6
	0.9
	1.4
	5.4
	12.3
	4
	3.7
	6.7
	0.3
	21
	0.8
	4.4
	1.3
	4.9
	0.7
	1.7
	6.3
	2.9
	4
	2.4
	20.5
	3.8
	5.3
	9.4
	2.3
	1.4
	28.3
	0.8
	0.8
	0.3
	0.3
	7.9
	0.7
	1.3
	0.8
	16.6
	7.3
	1.2
	1.3
	1
	4
	1.5
	3.3
	0.6
	0.4
	0.5
	0.4
	14.6
	35.7
	22.2
	0.8
	0.6
	6.6
	4.6
	94.2
	5.2
	15.2
	4
	5
	42.7
	3.7
	13.1
	4.2
	26
	1
	2
	0.6
	1.8
	11.5
	0.1
	0.2
	19.8
	2.4
	1.5
	18.5
	2.2
	0.9
	2.7
	23.2
	8.9
	7.8
	6.8
	0.4
	0.6
	19.4
	53.3
	1.1
	5.3
	1.1
	5.4
	0.7
	0.5
	7.5
	16.8
	22.3
	6.9
	0.3
	2.8
	0.8
	11.4
	1.8
	1.4
	5.8
	7
	1.5
	1
	3.9
	6.2
	1.7
	2.2
	1
	0.2
	0.4
	1.2
	3.7
	2.2
	0.6
	13
	2.1
	1.1
	1.4
	1.1
	0.3
	0.5
	1.5
	4.5
	1.8
	0.9
	0.9
	1.1
	6.8
	2.4
	0.8
	0.7
	1.2
	5
	2.1
	1.8
	8.2
	1.8
	4.6
	4.4
	9.8
	4.4
	1.7
	1.5
	2.5
	1.7
	2.7
	2.9
	1.9
	2.4
	4.3
	4.3
	1.4
	0.3
	5.2
	3.7
	2.1
	12.3
	12.7
	9.7
	3.3
	7.1
	0.5
	6.1
	57.1
	4.9
	31.7
	4.4
	1.9
	12.8
	1.1
	0.9
	0.3
	4.6
	8.1
	4.9
	0.6
	4.4
	4.5
	35
	2.3
	23
	2
	1.1
	54.2
	0.9
	1.4
	0.4
	1.7
	1
	16.4
	0.9
	0.2
	2.4
	1.2
	1.1
	2
	1.3
	1.2
	7.4
	1.5
	0.9
	1.4
	28.4
	9
	10
	1.2
	4.9
	3.2
	12.5
	3.2
	1.6
	1
	0.5
	1.4
	0.7
	0.7
	0.6
[truncated: 53 more rows]
