# Supplementary material for: The Ndc80 complex bridges two Dam1 complex rings
Source: eLife. 2017 Feb 13;6:e21069. doi: 10.7554/eLife.21069 (PMC5354518; doi:10.7554/eLife.21069)
Supplement: Figure 2—figure supplement 2—source data 1. — DOI: http://dx.doi.org/10.7554/eLife.21069.014 [file elife-21069-fig2-figsupp2-data1.xlsx]

## Sheet: Figure 2 - figure supplement 2
Table of residence times (sec) for Figure 2 - figure supplement 2
wt Ndc80	wt Ndc80 + Dam1 mock	wt Ndc80 + Dam1 ABC Ala mock	wt Ndc80 + Dam1 A Ala mock	wt Ndc80 + Dam1 B Ala mock	wt Ndc80 + Dam1 C Ala mock	wt Ndc80 + Dam1 BC Ala mock	wt Ndc80 + Dam1 AB Ala mock	wt Ndc80 + Dam1 AC Ala mock
1.6	7	19.1	2.2	8.7	16.3	14.3	16.6	3.9
0.9	1.7	0.9	0.5	21.2	1.4	10	0.3	2.2
9.2	2.4	3.7	14	12.4	2.1	3.8	1.2	1.3
0.3	2.2	12.1	6.7	2.2	0.6	0.1	18.8	5.6
0.5	0.8	1.7	9	0.5	1.1	0.8	0.2	1
0.2	0.9	35.6	3.4	1.2	8.3	1.9	6.3	1.1
8.4	2.1	1.1	1.4	0.4	0.1	1.9	3.3	0.3
2.5	1.1	2	3	3.1	3.8	4.1	0.7	10.9
1.4	0.8	5.3	0.5	8.1	1.2	10.6	9.1	10.7
3.8	0.9	8.7	2.8	1.2	0.4	0.8	1.5	4.9
0.3	1.1	1.2	2.6	2	2.4	55.1	10.6	2.2
0.7	1.9	1.3	1.5	0.2	4.4	0.7	2.3	0.8
0.5	2.4	1.4	2.2	0.2	3.3	1.5	0.7	3.5
0.3	4.1	2.7	1	4.6	0.8	1.6	2.6	1.7
0.2	1	2.5	11.5	8	1	10.3	1.7	0.7
0.4	1.4	25.7	5.3	9.6	0.4	6.4	2.1	12.4
0.4	4.5	3.9	2.7	2.3	1.1	2.1	4.5	0.9
0.2	1.5	1.2	4	0.7	1.6	8.7	1.2	0.5
0.1	2	0.9	2	0.7	0.8	19.3	0.5	1.1
1	0.7	3.1	1.4	2.5	1.5	1.3	0.4	2.7
1.1	0.8	0.4	0.6	2.5	0.7	12.1	2.2	0.7
0.6	1.3	1.7	16.1	1.7	0.4	9.7	5.1	12.1
1.2	0.8	7.4	5.1	1.5	1	3.8	8	0.6
1.3	0.4	1.4	4	2.9	1.3	0.5	1.6	1.5
1.2	13.9	15.1	1	0.7	0.5	43	0.8	1.2
0.4	6.6	1.1	6.2	14.9	41.8	0.4	8.4	1.8
0.5	5	27.2	27	3.4	3.2	0.6	3.6	10.1
1.8	3.3	4.8	0.8	0.2	6.9	4.1	3.3	0.8
2.9	4.8	4.3	2.4	0.7	2.7	0.7	1.3	1.9
3.1	0.7	0.8	0.9	3.2	2.9	12.5	2.4	1.5
1.5	0.8	0.9	1.4	1.3	1.7	1.5	15.2	17.3
0.4	1.4	2	0.6	1.4	1.4	20.6	7.3	4.7
1.6	0.5	19.2	0.6	52.3	2.8	9.7	11.9	3
0.8	0.7	3	0.7	18	1.4	2.5	3.6	1.5
0.3	0.9	1.1	1.5	1	17.7	5.1	3.5	2.1
0.5	0.6	0.6	3	5.5	2.2	1.4	1.7	0.4
0.5	0.6	1.2	0.7	2.5	0.9	0.4	2.7	1.2
24.5	0.3	0.5	1.2	0.5	1.9	9.5	8.4	0.6
1.3	1.2	1.5	0.4	1.4	10	14	6	2.6
0.6	0.5	3.1	7	0.6	1.8	11.2	12	1.5
1	2.4	5.7	1.3	24.1	0.8	0.7	1	0.8
2.1	3.8	3.9	3	1.8	0.7	1	0.9	4.5
2.6	0.7	0.8	2.9	0.3	1	1.5	3.8	7.8
1.2	2.4	17.5	0.6	0.5	1.8	0.7	6.6	4.6
0.6	43.1	45.7	0.9	0.1	2	0.4	1.4	8
0.9	9.5	15.1	21.3	2.5	7.9	0.5	4.6	1.5
0.4	33.4	5.5	8.5	1.9	0.7	6	19.1	1.4
0.8	17.5	17.3	7.9	0.3	1.2	7.2	7	1.2
15.4	0.3	1.4	11.6	0.2	0.4	4.3	9.2	0.9
1.9	0.6	1.6	4.3	0.5	71.9	6.1	2.4	1.5
6.3	6.5	0.7	2.3	16.5	1.8	5	0.6	2.9
0.4	0.3	0.7	1.6	0.4	1.6	9.9	0.9	1.2
10.4	6.4	4.8	0.7	1	1.4	1.2	5.3	1.6
3	1	1.5	6.7	15.4	1.9	4.4	2.8	3.5
1.5	2	0.9	1.8	0.6	0.5	4	5.3	0.7
1.4	2.1	0.8	3	2.7	0.4	2.7	2.8	1.6
0.5	21.1	1.5	3.3	15.7	0.6	12.6	3	1.8
0.7	5.1	0.6	1	1.9	0.3	2	1.5	4
0.8	1.4	17.2	2.5	0.5	0.2	2.5	1.7	0.8
1.1	4.1	8.5	7.3	5.6	0.2	1.3	1.7	0.8
1.1	14	2.6	1.3	1.6	0.1	3.3	1.8	4.8
1	1.8	5.8	1.6	0.3	0.5	0.8	1.2	2.2
1.5	1.5	7.6	4.1	4.6	0.9	7.7	1.6	15.3
0.6	3.7	18.2	1.5	1.4	3.5	1.2	1	11
0.5	3.4	0.5	2.1	4.9	3.7	0.1	1.2	1
0.4	0.5	1	5.3	7	6	4.8	1.6	0.2
0.4	10.6	4.9	14.2	1.2	0.3	0.8	1	2.7
1.8	1	8.2	7.9	2.9	2.3	0.6	0.6	0.6
0.6	2.4	0.7	1.7	10.6	0.3	1.8	0.6	0.8
0.3	2.3	3.3	0.6	6.1	18.2	4.2	0.9	1.2
0.3	1.2	8	3.4	1.3	1.3	2.1	34.7	0.7
4.8	3.3	5.1	2.9	3.3	0.5	9.7	1.5	0.5
2.3	2.1	4.9	1.4	6.8	0.5	0.8	1.5	1
3.1	0.2	5.2	0.8	8.8	1.7	18.5	4.5	2.9
2.5	0.3	2.5	20.6	10.2	2.1	0.2	2.6	1.4
0.2	3.6	3.4	2.4	3.4	2.1	3.2	3.7	0.3
0.6	0.9	8.9	4.9	4.2	3	3.2	10.1	6.5
0.3	9.8	0.9	0.5	7.3	0.9	1.7	12.6	1.6
0.3	1.5	1.9	2.9	0.6	1.7	6.5	1.9	0.9
1.8	15.4	5.8	1.2	0.6	1.4	6.7	0.7	1.3
1.2	11	2.4	2.1	0.9	0.5	0.9	7.8	3.2
0.5	7.5	2.8	2	3.4	1.9	8.8	35.4	0.5
0.8	1.8	43.5	1.3	1.1	1.3	1.6	9.7	0.6
1.5	5.1	12.9	1.2	0.9	0.9	2.4	4	1.5
6.3	2.9	4	3.8	0.4	72.1	17.8	3.3	2.9
0.4	14.2	7.4	0.5	8.9	7.7	2.3	0.8	2.7
1.6	3.9	1.2	3.3	8.8	0.2	0.3	14.8	2
0.3	8.1	4.6	1	0.9	0.2	1.7	7.1	1.8
0.9	6.4	2.8	1.3	8.9	0.7	15.8	17.3	1.7
10.6	2.3	9.6	9.4	20.7	0.3	2.3	1.8	3.4
5.2	1.3	10.3	0.8	0.9	1.9	10.3	2.1	2.1
1.4	3.4	1.9	10.2	2	19.6	8.1	1.1	1.3
0.4	1	3.4	1.7	0.7	3.1	0.3	8.3	1
4.5	3.2	4.8	2.7	1.4	0.5	13.9	1.7	2.1
1.7	1.1	7.7	5.2	1.8	1.1	12.9	25.9	1
0.1	0.4	0.6	5.1	0.3	0.4	0.5	2.1	3.3
1	8	3	2.1	9.8	3.4	0.3	2.2	0.5
0.9	22.8	1.4	1.2	0.2	1	3.1	10.4	3.2
22.3	1.4	2.5	0.5	0.2	1	24.5	1.1	2.5
2.7	0.7	0.9	4.3	5.1	0.4	0.4	6.1	1.9
0.7	0.9	2.1	3.6	3	3.3	5.4	3.9	1.9
2.6	1.7	1.6	2.8	26.8	7.1	4.4	6.9	1.3
0.2	0.7	10.2	4	22.2	6.2	5	8.4	2.9
0.5	2.1	4.9	5.5	0.4	1.6	0.2	8.2	1.2
4.9	1.3	12.8	17.5	4.7	1	7.2	1.5	1.9
0.6	7.1	5.3	1.4	9.2	9.7	0.4	2.8	1.7
5.5	2.6	3	2.8	1.1	0.8	9.1	2.5	0.5
1.2	1.7	2.4	5.9	32.4	0.2	29.4	16.6	4.8
3.2	8.1	4.3	1.2	31.3	4.7	0.5	0.8	5.1
1.7	0.9	1.8	0.8	3.4	0.2	8.5	2.3	1.7
0.5	16.6	4.7	1.1	8.1	16.4	4	1.8	1.2
0.6	0.3	1.4	0.4	17.2	1.6	8.2	1	3.7
0.8	1.2	0.7	1.8	1.5	1.8	3.9	12.3	0.6
11.9	4.5	4	1.8	1.3	8.1	15.8	5.8	0.4
0.4	0.6	1.8	3.7	17	3.3	2	13.5	12.7
0.9	2.4	25.6	1.4	0.6	1.2	1.4	2	1.4
0.2	3.7	6.2	1.3	17.4	2.4	2.5	5	0.3
0.8	0.6	1.2	1.1	6.6	4.1	10.7	13.3	0.7
1	2.1	1.4	1.2	0.6	1.7	2.3	2.6	1.3
2.1	5.3	6.5	0.7	0.3	1.2	4.4	3.8	0.9
8	8.7	2.4	1.9	1.8	0.3	1.2	2.5	1.8
0.9	2.7	1.2	3.6	2.4	0.6	1.4	1	3.5
0.6	1.4	1	1.7	2.4	1.2	7.5	2.1	2.2
1.4	1.4	9.5	1	2.1	3.5	0.9	3	8.8
10.3	3	3.3	2.5	2.3	0.8	27.8	1.6	0.8
1.7	0.4	3.3	2.4	1.1	1.2	60	1.3	0.8
4.5	3.7	13.2	3	9.1	2.2	0.4	7.5	1
0.6	0.9	2.7	4.6	1.2	1.1	0.6	6.4	22.4
6.9	0.2	3	0.8	11.4	0.5	7.5	3	5.9
1.7	2.3	4.3	18.6	10.1	0.1	0.4	2.6	4
0.6	0.4	0.6	1	9.9	0.5	0.4	24.8	1.6
0.4	1.2	9.1	3.6	35.2	1.3	29.7	12.1	1.2
0.6	1.2	5.9	1.4	19.7	14.2	5.1	3.6	2.3
1.5	0.3	5.2	0.8	0.3	2.3	1.9	11	1.6
1.1	0.3	7.5	0.5	0.2	1.3	0.9	3.1	1
4.6	0.3	0.9	7.8	0.2	2.8	0.7	11.5	1.1
0.3	0.5	0.6	4.5	0.6	1	1.9	7.4	0.7
2	1.4	1.5	72.9	2	1.8	2.9	1	1.3
0.4	1.5	6.3	0.3	0.4	1.2	1.7	1.9	0.5
0.7	0.4	3.3	0.4	0.3	11.7	0.8	2.2	1.1
0.4	0.3	2.6	1.4	0.8	2.2	6.4	8	3.4
7.4	0.4	5.6	0.8	1.6	7.9	5.4	1.9	1.3
5.6	0.3	2.9	0.6	0.7	3.5	12.1	8	42
0.4	5	3.7	2	1.2	0.8	8	1.3	2.5
0.9	2.1	0.3	2.9	4.9	5.3	0.8	0.5	0.7
0.3	0.2	0.7	23.7	1.3	3.2	1.1	2.2	7.9
1	3.8	1.6	0.5	0.5	2.5	1.1	3.6	1
0.4	1.2	1.5	24.8	15.7	1.4	0.8	2.7	0.6
0.5	2.8	0.3	2.9	1.4	4	1.4	16.5	0.8
1.3	0.4	0.5	26.4	8.2	0.5	3.2	9.4	1
1.2	0.4	4.9	8.2	1.2	1.6	6.6	7.2	0.8
0.3	0.7	8.6	1.5	0.8	0.2	2.5	13.4	0.6
3.3	0.6	0.6	1	14.7	2.3	0.9	3.7	1.8
2	2.6	1.5	1.6	2.9	1.5	0.4	3.7	0.4
2.1	2	7.3	0.6	0.2	1.8	1.3	3.1	1.3
3	0.3	0.8	1.3	0.7	1.4	4	0.4	4.7
0.1	2.2	4.5	0.9	1.2	1.2	1.1	2.8	3.1
0.5	1.2	5	1.5	1.9	0.4	4.3	3.2	2.3
1.1	3.3	1.2	1	0.4	2.7	18.6	1.6	1.6
0.5	2.2	0.7	2	0.5	10.9	16	3.1	2
0.7	0.2	0.8	3.2	0.8	3.2	3.1	1.4	0.8
0.3	5.5	32.7	0.7	0.1	1.9	1.4	3	7.7
1.2	0.5	1.3	17.3	4.6	3.3	5.7	4.7	12.5
1.1	0.3	6.6	0.9	6.5	1.9	1.1	1.4	1.4
0.9	0.9	3.9	0.4	1.3	0.6	1.3	1.2	1.7
0.5	2.5	2.9	1.1	1.2	1.2	1.2	15.3	0.7
1.5	2.6	1.1	1	11.4	0.8	6.8	11.7	0.6
0.5	2	1	0.7	7.6	2.5	3.3	6.8	1.3
0.1	1	63.6	1.3	2.1	3.1	6.2	3.1	1.4
0.1	2.6	0.8	1.3	0.1	0.6	0.9	1.9	1.1
0.4	0.6	1	0.2	5.5	5.9	2	3	89.2
3.4	2.1	0.7	1	8.2	25.9	11.2	0.9	2.5
0.1	0.5	2.9	0.5	2.9	1.7	0.3	0.7	1.4
0.7	7.3	1.5	6.8	3.9	4.7	0.4	0.5	0.6
3.4	0.7	2.8	3.1	6.6	6.7	14.5	0.4	0.7
2.3	1.9	1.8	3.5	2.6	1.8	0.2	6.6	0.5
1.3	0.6	2.1	1.5	5.1	0.8	7.1	3.7	0.9
0.6	5.9	0.4	0.9	8.4	1.3	10.1	2.1	1.8
0.3	3.2	15.8	0.8	2.2	1	1.3	1.7	0.7
0.6	1.5	6	2.4	1.7	0.3	2.1	1.7	3.2
0.7	0.7	4.2	0.6	2.6	1.8	5.1	0.8	2.7
0.2	1.1	1.1	6.7	0.5	1.1	1.4	4.6	2.5
0.7	5.3	1.6	2	0.6	1.3	1.9	11.9	15.6
3.9	0.9	3.8	1.4	34.7	0.5	0.2	4.5	4.1
0.3	0.5	1.7	13.4	10.4	0.2	24	0.7	1.5
0.1	0.9	3.4	2.7	0.9	0.8	6.5	1.4	2.3
0.5	2.8	33.3	1.9	2.5	8.2	7.5	1	0.3
1.3	0.9	12.5	5.6	0.4	4.8	2.8	4.8	7.6
0.3	0.9	3.4	2.7	1.3	9.6	15.6	4.3	6.5
0.9	2	3	25.9	8.6	2.5	6.5	9.1	1.8
0.3	3.4	2.9	1.4	22.7	2.3	15.6	1.4	0.7
1.3	0.7	1	2	9.3	1.9	9.8	3.5	0.4
0.3	1.3	0.8	1.7	17.4	1.8	0.6	2.6	8
0.6	8	5.1	61.9	0.4	11.1	1.7	1.8	0.9
0.4	5.8	1.6	113.2	0.4	1.7	1.1	4.7	7.7
9.7	2.4	3	43.3	0.5	5.9	4	9.8	0.4
0.8	1.2	0.8	8.6	23.1	1.6	4.3	3.6	2.3
0.5	2.1	1.1	5.2	6.6	9.4	9.5	7.6	0.6
0.8	4.2	3.9	0.9	29.2	1.5	2.2	0.4	0.1
0.4	2.5	1.9	0.7	1.5	0.9	7.7	5.7	0.5
0.7	2.2	5.8	2	11.9	0.7	4.6	0.8	0.8
0.4	4.4	11	1.4	0.9	4.9	0.3	0.6	0.8
0.8	2	5.4	1.3	0.8	1.9	6.6	2	1.1
1	3.3	1	1.3	0.6	1.8	7.4	13.1	0.4
1.2	10.2	17.5	8.9	0.9	0.9	0.5	6.7	0.7
0.7	7.5	1.8	2.7	71	27.8	5	1.4	1
0.4	1.1	21.4	8.8	0.9	4.6	2.7	1.6	4.4
0.8	1.3	1.4	4.7	1	1.4	6.7	0.9	1.7
0.6	2.6	1.7	3.8	0.2	3.6	7.8	59.3	1.8
0.5	3.5	1.1	4.3	8.9	9.4	2.1	3.1	2.7
2.5	2.4	0.8	1.7	1.7	0.5	1.2	10.8	2.2
5.5	4.2	1	1.4	1.1	1.7	1.7	3	4.1
5.9	35.8	2.8	1.2	2	6.8	15.2	2.9	0.4
1.7	1.1	3.6	1	11.5	2.3	4.2	1.8	0.1
0.6	2.6	7.7	22.7	2	1	1.3	4.6	0.4
0.1	1.4	0.5	1.5	0.9	23.3	8.2	7.2	2.9
0.2	2.6	2.5	1	0.3	17.6	15.1	9.6	3.4
0.4	7.8	2.6	2	5.2	16.8	23.5	1.8	0.6
14.1	6.5	7.7	3.8	0.5	6.1	18.3	1.7	0.8
4.1	1.7	1.3	3.8	0.7	0.3	32.8	0.9	1.1
1.9	1.3	0.9	0.6	27.8	1.8	11.9	1.2	1.4
2.2	6.7	0.6	1.8	5.6	3.9	0.5	1.2	0.2
1.1	2	2.4	2.9	0.4	1.1	0.9	1.3	0.5
0.7	6.6	4.9	1	9.7	10.8	1.2	0.4	2.7
1.2	5.5	6.8	0.9	2.9	3.6	9.6	0.4	0.7
0.1	17.6	1	0.8	0.9	1	10.7	2.4	12.2
0.1	1.2	11.3	3.1	2.9	16.7	1.1	10.7	1
0.7	0.1	3	2	17	6.8	7.6	12.3	2.1
0.3	3	3.2	0.9	4.3	5.5	8.1	2.9	1.5
1.6	2.6	1.4	2.3	1	3	53.8	8.1	27.4
0.5	0.7	0.9	0.4	0.7	5.2	8.7	4.1	5.7
0.5	1.1	2.9	3.8	0.9	3.4	7	1.1	1.6
0.6	1.7	1.1	5.2	0.8	7.4	1.5	2.9	3.5
0.4	3.9	0.3	0.9	0.9	1.1	1.1	0.4	1.9
22.2	37.6	0.5	1.1	0.3	2.7	3.4	2.8	0.9
1	7.4	1.1	0.8	0.7	2.6	0.6	1.5	1.9
0.7	10.9	9	3.1	1.1	2.1	2.9	2.8	0.4
0.5	4.1	5.6	1.6	0.4	3.9	0.6	1.3	71.6
0.5	7.8	2.5	3.2	3.1	2.9	0.8	3.4	3.1
1.5	17.1	4.3	6.3	18.8	3.7	4.8	1.4	2.1
0.8	33.8	3.2	2.3	1.9	3.3	1.2	2.1	3.2
0.5	4.3	8.1	1.8	1.3	2.4	19.6	2.8	1.1
0.1	1.4	7	1.3	0.8	6.6	20.6	1.8	2.1
4.8	0.7	0.6	3.6	2.4	10.5	1.1	4.5	0.2
0.2	5.7	13.8	1.9	1.7	0.5	2.5	0.6	0.4
0.2	3.7	4.5	4.2	0.7	0.7	2	2.4	1.1
3.6	8.6	4.5	1.2	1.4	0.7	0.8	0.4	1.4
0.4	8.8	36.6	15.5	3	3.4	5.4	0.6	4.8
0.9	8.6	5.3	78.5	1	6.2	38.3	1.6	0.5
2.9	2.8	1.2	2.3	0.1	10.7	4.9	7.1	3.7
1.1	5.9	3.3	5.2	4.2	19.9	0.6	14.1	1.5
0.1	1.2	5.6	0.8	1.5	12.4	14.7	5	0.4
0.5	0.7	0.7	0.8	0.7	9.2	17.5	28.5	0.7
0.4	2.4	5.7	0.4	0.7	2.3	1	3.7	0.4
0.6	3	1	0.6	3.7	6.9	6.8	1	0.5
2.2	1	8.5	0.4	29.2	1.2	2.4	1.1	0.2
0.8	1.5	1	2.4	11.4	1.6	4.3	4.2	0.3
0.1	9.3	0.5	1	3.2	0.5	4.9	4.3	5.5
0.2	18.1	0.7	0.7	1.1	5.7	9	4	1.1
0.1	4.6	2.9	1	1.7	2.8	0.4	3.8	6.3
1.8	1.8	1	1.3	1.1	1.6	0.8	3.8	2.2
0.9	8.7	7.2	0.9	1	5.7	9.1	2.2	0.8
0.6	2.1	5	1.7	0.4	2.7	1.5	1.3	1.5
5.4	3.5	6.2	37.1	4.4	0.4	1.7	1.9	1.1
1.4	6.1	1.7	11.4	0.8	0.6	2.2	1.4	0.5
0.7	2.5	2	4.3	2.6	6	1.6	1.5	7
1.8	2.6	1.7	1	15.4	3.2	1.1	0.9	1.6
3	1	0.2	1.3	8.6	10.2	0.9	1	33.1
1	0.7	1	0.2	1.6	2.6	0.7	0.7	19.8
5.9	0.5	2.8	0.5	2.4	1.1	1.6	1.5	6.5
1.4	2.1	47.7	0.9	12.5	13.2	5.1	3.1	2.7
2.6	0.5	3.2	0.8	1	1	3.6	9.7	1.2
11.6	6.1	5.9	2	0.9	20.3	0.4	5.5	1.5
1.5	1.4	4.6	16.6	1.5	11.8	4.7	10.4	0.9
2	0.7	3.7	1.5	4.2	13.3	8.5	31.7	3
7.5	0.5	18.5	2	2.5	17.7	3.9	0.9	0.5
0.7	0.3	4.7	2.5	36.2	4.4	1.3	1.4	0.4
1	10.4	0.7	0.7	0.9	0.4	0.9	11.2	0.5
3.5	1.1	3	0.7	1	1.8	9	8.2	6.2
0.4	3.3	2.2	1.5	3.3	2.7	5.1	2.9	2.1
4.8	4	12.2	2.1	0.6	3	0.8	1.9	1
0.6	1.4	1	3.9	0.8	4.1	0.3	2	0.9
0.8	2.3	4.9	3.4	0.2	0.7	17.8	1	3.4
2	0.6	2.1	0.8	0.4	1.1	8.3	0.9	1.1
6.6	0.5	3.5	1.4	1	16.4	4.5	3.7	0.8
1.4	0.5	3.6	3	0.6	0.2	3.1	0.5	5.2
1.3	0.1	0.4	14.7	0.1	1	9.6	0.4	7.2
1.2	0.4	1.3	1.1	7.6	0.8	10.6	1.4	1
1.6	0.6	2.7	5.3	2	0.8	3.7	2.7	1
2.1	9.5	7.1	0.9	2	0.8	5.1	2.5	2.9
0.6	1.5	13.6	2	2.2	0.6	4.7	10.1	9.2
0.8	5.4	1.1	1.7	1.8	0.4	1.8	1.9	0.7
1.1	2.3	1.6	1.8	10	0.4	0.6	0.6	0.5
8	5.5	0.7	0.7	7.7	1.3	7.6	1.3	2.4
2.3	18.9	0.8	2.3	2.2	0.4	5.9	1.2	1.7
1.9	9.7	0.9	3.9	2.6	3.3	9.1	5.4	1
0.4	11.9	4.8	2.9	7.5	2.1	0.7	11.4	1.1
11.2	11.4	3.8	2.9	24.3	11.1	0.4	1.5	1.2
0.5	0.8	1.6	3.6	2.9	10.3	0.7	2.6	3.8
2.1	1.5	8.4	2.5	4	0.5	0.5	0.7	2.5
0.6	1.2	3.7	1.1	2.7	0.8	1.2	0.3	1.7
14.7	1	1.8	25.9	21.8	1.2	0.7	2.6	0.3
6	2.6	1.4	1.1	1.3	1	0.8	5.5	0.5
0.6	1	1.4	0.8	15.2	18.3	0.9	5.5	1.3
1.6	0.8	1.5	1.2	1.8	8.9	1.2	6.5	0.7
0.5	16.2	3.2	0.7	5.4	1	3.5	0.6	4
0.8	1.5	4.1	1.3	5.3	4.2	9.1	3.6	20.9
1.2	4.2	5	4.7	5.4	3	0.7	1.4	16.9
1.2	1	4.8	0.7	2.4	12.7	1.6	2.2	0.8
5.4	2.2	1.3	1.9	1.4	4.9	7.8	2	1.3
0.5	9.2	5.1	2.1	25.7	8	2.8	1.7	2.4
1	2	7.4	0.6	5.2	1.5	3.9	2.2	4.5
0.5	5	1.9	1.7	13.3	0.8	7.3	6	2.3
0.6	3.5	6	0.6	1.2	1.6	7.8	10.6	1.5
0.6	5.2	3.3	0.8	0.7	0.6	2.1	1.4	6.6
3.9	2.5	1.2	7.5	3.3	0.7	1.4	4.6	6.6
2.7	3	0.8	0.5	1.4	0.8	8	1.5	3.3
1	0.7	14	1.4	1.2	4	1	2.3	3.5
0.6	1.7	10.4	8.8	0.7	37.7	0.9	1	2.4
13.8	40.7	7	0.8	0.8	1.4	9.9	0.9	2.7
2	0.8	2.8	17.2	1.6	0.8	0.3	1.3	16.4
1.6	0.9	1	7.8	2.2	1.5	15	4.6	7.8
1.9	0.9	2.6	2.5	0.6	0.6	21.7	4.3	5.6
0.9	1.6	2.2	6.9	10.6	2.6	7.7	3.8	1.9
1	1.2	2	2.1	2.4	3.6	12.5	1	3.2
1.6	2.3	13.9	9.4	0.2	0.3	1.6	0.5	0.4
0.5	1.7	9.1	1.1	0.3	0.2	12	3.2	12
0.5	3.9	15	4.4	2.1	8.2	4.2	1.5	0.6
6.4	27.5	5.9	1.7	6.3	5.4	12	14.7	1.1
5.1	1.3	1	1.9	0.5	6.4	2.3	7.5	16.4
1.8	0.6	2.9	10.3	1	0.3	5.5	6.4	9.1
0.6	2	1.4	1	0.6	5.6	2.7	1.1	4
0.9	1.2	3.4	9	16	10.3	1.6	1.1	1
0.4	19.5	1.2	1.6	2	4.3	6.5	1.1	1.9
0.8	1.5	5.1	1.2	6.3	27.6	6.1	2.3	1.4
1	3.1	8.6	1.5	27.4	4.1	1.6	6.6	1.1
0.8	0.8	0.8	2.9	1	37.7	5.5	11.2	7
1.3	0.6	1.2	15.9	20.7	1.8	24.3	6.2	1.5
1.8	13.9	6.9	11.1	3	3.3	10.7	2.2	5.8
16.9	0.8	2.1	1.5	3.9	4.1	13.9	1.5	4.7
0.9	0.3	2	55.5	12.4	0.6	1.1	2.2	2.8
2.4	0.6	3.6	2.6	2.2	5.8	35.5	1.6	0.7
0.3	0.4	2	1.6	17.3	0.8	10.7	5.1	1.3
1.3	3.5	0.6	0.7	10.9	0.8	0.4	0.7	1.3
1.6	5.3	9.5	5.6	1.9	11	0.6	1.4	0.6
1	1.6	6.1	1.4	0.6	9.1	2.1	0.6	0.8
3.7	2.9	9.4	46.1	0.8	6.2	1.6	1.2	0.7
0.3	2.2	1.5	3.3	3	12.3	3.4	2.6	0.3
0.6	1.5	1.4	1	4.4	2	7.2	2.3	0.7
4.6	4.9	4.2	1.3	3.3	1.2	19.3	7.3	1
1.5	0.7	21.8	1.1	2.3	1.4	2.4	9.2	0.8
2.5	3.4	6.3	0.7	1.3	1	1.6	3	0.8
1.9	1.6	0.8	19.3	1.4	1.1	6.6	15.1	1.3
1.7	15.9	0.7	2	2.3	0.5	32	1.9	8.4
2.1	2	20.5	1.5	2.1	14.8	0.2	1.5	0.7
1.4	1	1.9	3.7	2.8	0.4	0.4	2.2	1.1
1.5	5	3.5	5.3	3.4	0.5	4.4	0.9	7
0.4	14.7	3.3	3.4	2.7	1.2	12.5	7.5	1.4
0.6	0.7	1	0.7	6	3.3	4.5	0.7	0.7
12	0.7	4.9	18.9	4.2	15	1	0.4	0.5
2.3	11.5	5.1	2.6	1.9	14.8	1.5	1.2	1.5
1.6	9.6	14.7	1.5	8.5	16.3	1.1	9.4	2.3
1.3	2.2	1.5	8.8	9	2.3	2.1	1.1	2.2
4.3	8.1	1.1	2.1	1.7	4.9	4.7	0.3	1.6
1.8	4.2	9.1	1.9	15.4	6.9	0.3	1.3	3.4
1.4	5.7	6	8.6	3	0.5	1.1	1.1	7
2.3	0.7	1.8	19.1	2.1	14.5	2.5	1.3	12.4
1.7	2.7	5	2.8	18.6	6.3	2.9	0.7	1.1
0.9	0.7	6.6	13.7	3.6	8.4	0.9	1.6	2.8
6.8	2	2.3	4.3	0.6	0.6	6.9	6.1	0.9
2.5	5.5	3.9	19.8	9.3	0.8	0.5	3.9	0.7
0.6	0.4	7.5	2.6	1	0.5	2.5	4.3	0.3
0.4	0.5	2.6	5.3	14.6	0.5	2.7	6.3	0.9
2.8	10	48.7	6.7	2.1	0.7	1.5	3.4	9.4
1	13.5	1.8	6.3	3.1	2.4	2.3	11.5	7.8
1.6	1.5	4.2	0.7	3.4	1.5	17.6	1.4	6.4
0.5	1	2.1	15	1.8	3.9	6.4	2.4	0.7
4.4	3.9	2.5	6.2	2.8	5.5	3.1	0.7	1.2
0.2	0.5	2.9	1.5	9.9	2.2	0.4	0.9	1
1.9	6.3	18.7	6.6	1.7	2.5	1.4	0.9	2.4
1.7	7.6	2.8	19.6	2.4	5.9	0.4	2.1	1.2
0.8	0.4	1.6	12.3	0.3	5.3	2.8	7.5	0.7
1	1.1	3.2	3.3	0.5	8	1.5	7	3.3
0.7	0.7	1.1	2	0.2	2.8	3.1	1.1	2.4
0.6	6.2	0.9	8.3	0.3	0.2	0.9	4.7	0.9
1.6	0.3	0.9	28.7	1.5	1.1	1.5	2.8	3.6
1.9	15.7	1	1.9	0.2	0.3	6.1	11.3	2.7
0.4	0.6	0.8	3.1	4.1	0.3	0.5	4.8	3.5
2.5	2.2	0.8	0.4	0.4	6.1	0.5	0.8	1.7
0.7	0.4	2.9	8.4	9.4	4	2.1	26.7	0.7
0.5	3.9	8.2	2.4	2.1	95.4	1	6.9	1.4
1	0.8	13.4	33.1	0.2	9.9	7.8	0.2	0.5
1.5	0.3	20.8	0.7	0.3	1	1.4	2.6	2.4
1.1	0.5	3.2	16.3	0.5	5.5	0.9	2.3	1.3
0.4	1	9.2	2.7	1.3	0.4	13.2	0.6	1.7
1	1.6	6.5	3.5	0.5	3.2	0.6	3.3	1.1
0.5	4.1	2.4	0.5	0.5	4.4	22.7	0.6	1
4.9	2.2	1.2	4.5	10.4	0.4	0.7	9.1	0.3
0.6	0.4	60.5	13.5	9.9	2	17.6	2.1	8.2
3.2	6.7	11.4	0.7	30	9.3	1.3	2.8	2
2	3.4	14.7	23.6	4.6	7.2	0.2	7.9	4.4
6.2	0.6	3.9	1.5	5.2	1.5	2.4	1.2	0.5
0.8	8.3	2.5	13	3.5	1.1	1.5	0.8	1.6
0.3	0.5	1.4	0.5	3.2	0.7	7.3	6.1	0.7
1	3.7	2	0.9	0.9	0.9	0.4	3	0.1
1.3	0.8	5.6	0.4	4.5	0.2	1	3.2	0.3
2.7	3	7.6	1.9	8.4	0.5	0.6	4.7	17.3
0.5	1.4	2.5	0.8	2.3	0.8	5.8	4	1.9
1.1	4.3	6.4	0.9	2.9	0.3	6.4	4.8	1.1
1	5.7	7.6	23.8	0.5	0.8	8.4	1.6	1.8
1.4	11	4	7	1.7	0.3	0.8	6.8	1.4
3.8	2.7	2	5.9	18	0.3	0.9	7.2	2.3
0.4	2.2	4.1	2.3	1.8	8	6.3	2.7	1.1
1	2.8	3.2	37.1	1.2	0.5	20.8	1.9	1.1
2.5	1.1	4.3	1.4	0.2	0.9	0.4	0.9	4
1.4	0.6	14.3	4.2	0.7	1.3	0.5	3.5	1.4
5	3.6	6.3	7.6	1	0.4	12.6	2.7	3.7
0.7	0.4	14.7	3.3	2.4	0.5	5.3	2	0.7
0.4	0.6	1.7	17.3	2.4	2.5	0.4	10.4	5.1
1.1	2.5	0.8	4.3	2.5	0.4	0.4	15.7	0.9
5	4.5	1.5	2.1	5.4	1.6	34.9	9.6	2.3
1.5	16.2	11.6	4.6	2.7	2.8	1.6	8.7	6.6
1.5	2.4	4.1	1.8	1.1	0.9	15.6	0.6	1.7
0.5	11.2	16.2	4.7	0.5	10.4	13.1	1.7	4.4
0.5	8.5	2.8	3.4	0.1	1.1	3.5	4.2	4.5
0.9	11	9.3	2.4	1.3	2.2	5.7	1.4	0.7
0.7	0.7	1.4	2.5	9	1	0.7	6.9	2.6
0.7	4.5	1.6	23.7	1.6	0.3	2.8	1.1	1
1.6	1.9	8.1	3	6.9	3.2	1.3	2.5	5.9
0.7	4.1	2.4	2.2	4.2	2.6	2	31.9	1.1
1	0.9	0.9	12.6	4.3	4.9	2.3	8	5.1
6	2.2	1	7.1	16.9	3.2	1.4	5	1.8
1.3	1.2	34.5	1.7	7.6	0.7	0.6	1.3	3.2
0.9	2	7.8	6.5	1.9	0.9	0.5	5.4	1.2
1.6	2.7	12.9	7.3	3.8	0.4	10.4	37.3	0.5
0.7	1.5	6.8	2.9	3.9	5.5	1.3	5.7	4.4
2.1	3	0.2	6.4	23.1	15.1	6.7	3.6	2.6
0.9	0.9	2.2	2.4	22.1	1	0.8	12.6	6.1
0.8	1.7	0.4	5.8	2.3	1.2	1.4	0.3	3
1	0.5	0.4	9.4	1.1	13.1	1.6	2.9	7.4
0.7	2	2	8.3	0.5	1.1	1.2	30.9	1.3
0.3	3.7	23.3	8.4	5.3	1.3	1.6	3	0.6
8	5	6.7	4.7	8.9	6.5	5	8.1	1.8
1.2	4.4	0.9	23.8	1	0.7	0.8	9.5	7.7
0.7	4.5	0.7	1.4	0.5	1	0.7	1.5	2.9
3.9	10.2	18.5	0.7	0.8	3.6	0.7	7.3	0.9
3.7	1.8	0.8	1.1	1.2	8.3	1.3	0.4	2.9
1.7	1.8	8.1	1.8	1.5	0.9	0.7	2.8	0.6
9	2.7	1.4	3.6	1.5	0.7	2.3	0.5	1.1
18.2	11.8	1.3	2.3	0.8	69.4	0.4	3.6	0.9
1.1	23.6	1.9	2.8	1.9	9.2	1	3.7	9.1
1.6	5.8	5.1	2.1	6.2	10.2	6.3	11.7	2.2
16	9.5	2	2.2	2.9	0.8	0.9	2	1.4
0.6	2.4	2.6	3.1	10.5	7	5.9	15	0.9
0.9	3.2	0.6	0.2	11.4	4.1	0.8	14.1	0.9
1.5	0.7	0.6	10.2	7.9	29.5	0.3	4.5	52.5
2.8	3.1	0.3	30.5	2.1	1.3	0.6	9	0.9
0.9	0.5	2.2	9.4	5.1	1	1.1	10.2	1.1
0.4	9.3	1.8	17	4.4	1.7	3.6	9	0.9
0.9	3.8	30.2	14.7	3.2	37.8	1.4	4.6	36.8
0.5	0.6	1.3	3.4	3.4	3.3	8.9	13.2	21.8
0.7	0.5	3.6	1.7	10.8	10.8	1.3	0.8	2.3
1.1	13.1	1.2	1	3.1	3.2	1	0.6	2.2
1.5	11.8	2	2.9	1.6	1.7	2.6	2	3.3
0.9	0.3	0.8	8.4	1.1	17.2	3.7	3.6	1.8
0.8	0.3	5.4	6.3	0.6	1.8	3.5	25.7	1.1
0.6	0.5	1.8	14.2	0.6	2.6	11.8	0.5	2.2
0.5	0.9	3.3	2.2	3.7	16.1	2.2	0.5	1.4
0.6	0.9	1.9	11.5	1.2	6.7	1.1	5.6	1.1
0.1	1.1	0.9	3	0.7	6.5	0.6	9.1	16
0.3	2.7	1.1	2	0.5	1.5	5.3	2.2	3.1
0.3	8.5	3.4	1	20.6	10.7	15.1	1	2.8
0.2	0.7	0.5	2.2	1.3	1.5	6.8	1.3	5.2
25.4	5.5	0.6	0.7	1.3	7.1	0.6	0.3	3.1
1.7	12.6	11.7	1.7	0.4	3	4.7	0.7	5.8
1.6	13.1	12.8	5.1	0.5	12.3	3.4	7.7	20.5
5.8	7.7	2.2	4	0.2	0.6	2.1	1.5	7.3
4.3	7.7	1.5	0.3	1.4	1.3	0.8	5.7	1.6
4.5	1.1	3.1	2.4	0.8	22.9	1	1.2	1.7
0.6	3.3	38.5	1	1	32.1	2	3.1	11.5
0.8	2.2	6.9	22.7	0.2	9	11.8	1.1	7.6
0.5	0.5	3.8	0.6	11.8	21.6	0.5	4.2	3.7
0.7	1.3	1.6	2.4	7.5	1.3	1.2	1.5	1.6
4.5	1.4	1.3	0.9	4.6	30.8	0.1	4.6	2.3
0.8	7	1.6	4.8	0.6	1.9	5.2	26	3.9
1.7	3.8	0.8	8.1	1.2	38.2	2.4	1.8	0.5
0.3	3.2	12.5	8.3	0.7	43.3	14.3	0.7	3.3
0.9	0.8	5.7	0.9	3.1	40.8	7	5	27.6
8.9	2.3	5.3	2.3	0.7	1.1	9.2	1.8	1.5
2.1	6.3	0.6	12.5	3.8	0.5	1.2	6.5	11.3
0.1	1.4	4.3	1.7	3.6	6.3	0.6	2.6	5.8
4.1	0.8	0.5	3.5	12.8	0.7	0.8	1.5	0.8
0.3	3.4	0.8	2.1	1.7	0.5	2.6	1.3	2.5
3	3.8	4.3	3.1	3.1	2.6	4.2	10.2	5.3
0.5	2	3.2	2.1	5.8	0.4	1.9	2.1	51
0.5	11.2	1.8	1.6	37.5	0.9	3.7	16.2	2.8
2.2	18.2	5	1.4	13.5	3.3	4.9	2.3	2.7
2.4	6.1	2.7	0.9	3.8	0.4	0.7	1.9	1.2
4.4	2.4	1.2	5.1	9	2.4	1.4	7.1	7.6
3	2.8	3.4	1.2	2.5	12.3	0.9	2.9	3.7
2.1	4.1	1.8	6.5	0.2	2.3	0.6	3.9	4.6
0.8	7.9	8.3	1	4.7	1.1	1	2.8	2
4.4	2.9	7.2	1.4	1.7	3.6	0.6	12.7	1.4
0.7	1.7	3.2	1.1	6.5	1.3	2.4	1.3	3.9
6.3	12.2	2.5	1.8	9.5	3.2	4.4	2	4.1
1.5	12	2.3	4.3	5.8	0.7	6.2	3.5	17.9
9.5	3.4	1.7	0.8	2.7	0.8	1.8	0.7	3
1.6	3.3	0.7	1.1	16.9	14.8	4.4	1.4	1.4
2.2	3.2	1	11.5	2.2	18	2.4	1.6	12.9
1.4	2	4	7.3	5.4	10.1	2	9	8.4
0.2	1.5	3.4	9.8	11.8	1	1.4	6.1	12.9
22.2	2.4	2	2	0.8	2.6	1.3	2	23.1
0.7	4.9	1.3	23.5	1.1	18	0.5	5.3	1.3
3.8	0.3	0.6	1.6	6.9	4.3	1.5	3.4	17.2
1	5.5	2.4	0.5	0.8	0.4	2	5	42.8
1.8	17	1.3	0.2	0.8	5.4	0.8	2.6	10.2
1.1	1.9	0.8	3.6	0.6	11.8	7	4.6	9.1
0.7	2.9	2.8	5.8	4.3	5.6	8	7.7	6.1
0.6	0.5	0.6	0.4	1.2	4.1	3.2	6.6	0.8
1.2	0.6	12.7	0.6	0.3	2.4	6.5	10.6	11.4
0.7	1.2	2.9	0.6	0.4	0.4	6	1.2	4.9
2.1	2.3	2.3	0.6	0.7	2.5	8.6	2.1	7.4
6	0.4	13.6	2.8	3.4	0.7	0.7	1.3	10.5
2.8	3.5	25.6	1.8	0.6	7.5	3.4	18	8.7
0.8	2.3	14.4	0.3	0.5	10.5	1.6	3.9	20.3
0.4	2.4	5.8	4.1	8.1	24.1	0.9	4.8	3.2
2	2.3	3.5	1.5	4.8	10.8	0.6	2.4	0.4
1.7	1.3	0.7	1	18	7.8	0.3	21	15.5
1.4	8.8	2.4	33.6	0.1	2.4	0.3	0.9	17.8
0.7	22.5	5.5	3.9	1.2	14.8	1	1.4	0.9
0.5	2.5	2.3	6.7	2.7	1.8	6.3	1.4	2.5
9.6	0.9	4.5	1.1	1.1	54.9	0.6	0.6	1
1.3	1.3	0.8	8.7	6.9	1.6	19.2	3	13.3
2	11.4	5.1	0.6	2.4	5.1	11.8	7.2	22.4
1.5	1.3	1.4	9.6	0.7	0.8	3.5	2.5	1
0.8	2.1	0.5	2.7	7.5	0.7	0.9	1.1	1.6
0.9	3.2	0.5	0.8	3.6	2.4	1.4	0.5	33.2
0.1	2.6	9.5	1.6	0.3	10.9	2.2	3.5	6.6
0.2	3.4	0.4	0.9	0.9	3.2	1	40.5	7.4
1.3	1.6	11.2	2.9	2.4	6.8	0.3	2.5	4.9
14.2	0.7	3.2	65.8	80.6	8.4	2.1	20.7	0.7
2.1	1.1	1.7	3.7	11.3	4.1	0.2	4.8	11.7
2.9	1.6	0.3	0.8	19.3	2.1	0.7	1.1	1.5
1	2.7	0.7	3.1	3.3	9.8	0.9	0.8	2.8
0.6	2.2	3.6	6	20.7	1.3	1.3	8.2	17.4
0.7	25.3	1.6	3.9	0.9	0.2	0.8	4.4	12.8
1	4.7	3.3	2.3	0.1	88.2	14.2	1	26.9
1.1	0.6	2.1	4.3	1.5	1	0.6	1.2	5.8
7.4	2.5	0.8	18.1	0.3	0.7	0.3	1.1	6.9
0.9	0.8	1.8	24.3	0.4	1.6	0.7	1.4	2.2
4	4.7	0.8	3.4	3.1	5	10.3	17	33.3
2.3	1.2	9.8	1.7	0.7	1.2	1.3	2.2	17.7
1	0.7	3.4	6.5	1.5	1.7	1.1	13.7	10.3
2.3	0.8	5	3.5	8.1	0.7	1	1.9	3.9
0.7	7.8	0.5	1.5	0.7	0.7	0.5	4.7	5.6
0.8	21.7	0.5	3.6	0.3	0.4	0.7	5.3	10.3
0.5	2.7	1.7	4.7	1.6	8.3	0.5	2.5	1.2
1.7	3.2	0.3	6.9	1.9	12.3	0.9	2.3	3.9
0.3	0.4	2	8.1	10.5	4	8.3	3.2	3.7
1.1	5.4	7.2	6.3	0.7	12.3	12.1	0.5	5.4
0.2	0.6	85.6	0.4	2	3.3	0.6	0.5	0.5
2.1	0.8	4.6	3.6	6.5	4.1	6.6	9.8	6.8
14.4	5.2	1.9	33.3	7.2	6.8	3.5	1	17.4
2.5	1.1	0.7	5.6	5.8	1.9	5.2	7.1	4.3
1.2	0.7	0.6	0.5	2.3	7.3	0.5	1.7	9.5
0.6	0.6	0.2	0.5	1.3	5	0.6	9.8	12.9
1.6	2.9	9.6	1.6	18.4	1	0.5	6.2	5.3
5.4	3.7	7.6	2.1	6.2	1.3	0.3	7.4	5.4
14.7	1.8	10.6	11.3	2.7	5.3	0.5	0.5	1.3
5.6	4.7	1	6.3	1.6	3.9	0.7	11	2.1
0.5	11.9	2.1	1.6	2.5	21.8	1.2	4	16.2
3.6	2.9	0.6	14.6	5.5	1.3	0.2	9	4.6
2.3	6.1	4.4	1.5	8.9	2	2	1.5	5
1	0.2	10.6	0.3	4	7.2	1.4	10.9	2.9
1.3	0.7	2.9	25.6	5.9	2.6	7.3	2.5	31.5
1.1	2.1	1.1	1	0.9	13	3.1	1.6	1.1
1.8	1.3	4.3	2.2	3.2	26.6	0.4	7.5	5.2
0.9	41.4	2.5	2	1.2	0.9	37.9	1.7	5.7
0.4	11	2.3	2.3	3.8	1.2	1.6	2.1	33.5
0.4	8.3	2.2	2.7	0.5	1.6	1.4	1.1	1.7
1.9	2	2.5	1.7	1.5	20	2.8	1.2	1.7
1	0.9	2	7.7	4.5	1	5.9	0.9	3
0.3	1.1	1.1	1.4	0.4	22.8	2.9	0.9	1.5
0.2	1.3	76.3	1.7	3.3	2.1	2.1	1.3	1.1
0.2	1.9	2.3	19.9	7.9	6.4	0.3	1.3	2.5
1.8	3.6	8.3	9.1	3.7	7.1	17.8	1.3	17.1
1.3	4.9	1.7	3.7	1.5	4.1	1.4	8	1.9
2.5	0.8	4.6	7.8	12.1	1.5	1	1.9	5
1.4	0.7	1.3	1.8	9.5	19.4	4.1	2.6	10.8
0.6	1.9	0.5	3.9	1.5	2.5	4.1	5.5	0.4
1.3	0.6	3.5	1.5	2.1	4.2	16.3	6.5	1.5
0.6	1.8	0.8	0.6	0.3	6.3	1.2	6.4	0.5
6.8	3.7	1.4	16.5	0.1	12.4	2.6	4.5	7.2
0.9	1.7	1.2	0.9	2.2	33.1	3.6	1.3	0.8
1	1.5	1.6	3.2	1.9	14.5	3.1	3.3	2.2
0.9	0.7	5.9	1.6	3.3	14.8	2.8	1.6	2.2
1	0.7	3.9	4.7	0.9	6.5	0.5	1	1.3
0.4	1	5.8	12.4	1.2	4	7.5	5.7	1
0.4	0.9	18.2	14.7	38.4	0.7	0.6	10.5	0.9
0.7	2.3	2.5	4.4	3.6	0.5	0.4	14	4.5
0.6	0.5	1.2	2.6	0.3	0.6	0.4	1.5	1.1
1.6	0.4	1.3	1	3.8	0.7	0.6	1.2	4.6
1.1	0.4	2.4	4.5	0.5	4.5	5.2	4.7	6.8
1.7	18.3	5.6	8.7	0.1	5.3	1.2	1	1.1
0.7	2.8	2.7	6.9	0.6	0.4	3.3	1.3	0.8
3.3	1.3	1.1	2.3	0.4	1.8	6	2.3	8.7
1	0.9	2.2	2.5	1.1	1.1	1.3	6	1.1
1.1	1.5	4.8	0.9	4.4	8.7	0.5	1.3	0.7
1	3.7	1.7	0.9	3.9	11.8	35.5	2.9	0.4
4.3	9	1.7	0.5	1	4.1	1.4	1.3	2
2.9	25.3	1.3	0.9	0.5	2.6	1.1	1.1	0.8
8.2	8.5	6.7	0.7	0.3	1.6	4.9	15.9	4.9
1.4	1.3	2.6	1.2	0.4	4.8	2.9	2	1.2
1.7	3.3	0.5	10.8	7.4	8.5	3.7	15.1	0.8
5.6	7.2	0.4	1.4	2.5	5	26.8	2.1	1.6
1.3	1.9	0.8	5	2.7	21.9	1.3	0.4	1.1
1.2	0.5	4.8	1	3.1	1.3	3	12.8	7.9
1.3	1.6	3.1	3.2	1.9	6.9	18.7	1.3	4.4
19.1	1.4	3.8	0.9	30	2.9	0.6	2.1	1.5
1.4	1.4	3.4	6.1	7.5	4.1	1.9	0.6	1.1
1.6	7.7	10	1.6	1	5.7	0.8	0.5	0.8
0.7	4.9	3.7	0.9	0.8	16	3.4	1.5	3.5
0.2	10.9	0.3	0.7	1.4	49.1	1.2	6.3	2.2
2.5	1.3	0.6	1.9	0.8	2.5	0.5	0.7	16.5
1.3	5.4	2.1	0.4	0.6	3	8.3	1.1	1.5
1.9	2.8	2.1	1.4	2.9	3.3	1.6	1.8	7.5
0.9	1.7	3.1	0.7	0.9	4.9	3.2	0.7	10.1
1.5	0.6	2.4	0.5	0.8	0.2	1.2	2.3	3.5
1.5	1.9	1.1	6.4	0.1	4.6	1.6	0.4	2.8
0.5	2.3	1	3.5	1.5	29.3	0.9	2.6	1.6
0.7	2.2	1.3	1.5	0.1	8.4	0.7	2.3	10.7
1.1	1.7	1	0.5	6.5	10.5	2.2	11.1	0.9
1.2	1.6	14.5	0.5	9.2	1.6	7.7	8	4.5
1.3	8.4	7.9	9.6	0.6	48.7	5.5	9.8	1.2
2.5	0.9	4.6	4.2	1.3	12.1	1	1.9	3.8
1.1	1	1.3	37.8	0.6	2.8	0.5	8.4	8.1
0.9	1.7	9.6	12	0.2	9.1	0.3	3.9	19.7
1.8	2.2	6.9	6	0.8	7.8	9	8	1.4
0.7	1.4	0.3	0.8	1.5	1	12.9	1.3	3
1.2	6.2	0.7	0.5	0.9	3.5	1.7	24.8	1
0.7	0.6	3.3	0.3	1.2	2.3	0.5	1.6	8.2
9.7	1.4	1.8	1	14.3	13.1	1.7	3.2	0.8
0.7	3.7	1	0.8	0.9	0.4	1.4	1.3	0.8
2.3	0.8	10.8	2.8	4.4	2.8	3	4	1.4
0.7	0.5	1.2	10.9	0.3	18.1	1	1.3	0.5
0.8	0.5	2.1	5.8	4	4.9	2.6	3.7	6.2
0.5	0.9	0.3	5.1	3.7	0.6	2.6	3.2	4.4
1.3	0.7	0.3	8.1	0.5	32.5	0.6	20.4	18.6
0.5	0.7	0.9	17	9.1	1.8	1.4	3.6	11.7
0.4	3.6	12.3	19.7	1.1	1.8	4.2	3	4.9
0.1	3	0.3	2.2	4.6	19	6.1	2.2	4.1
0.4	2.9	0.7	2	5.4	8.9	1.3	0.4	5.8
0.4	0.4	0.5	1	0.8	46.3	1.9	1.2	14.6
0.5	1.1	6.3	2.5	2.3	1.9	6.5	1.6	19.4
0.7	1.8	0.9	7.2	2.6	2.1	7	1.9	6.7
3.4	9.6	1.1	1.4	1.2	1.3	12.8	4.6	2.5
0.6	0.8	8.4	0.4	1.5	0.8	4.3	12.5	2.4
1.3	1.7	8.4	0.8	0.4	1.6	2.6	1.9	2.1
5.9	1.8	0.6	28.4	0.6	0.6	2.2	1.3	1.2
56.2	17.8	20.2	2	0.4	0.8	1	0.9	1.2
3.1	0.9	16.3	3.4	0.2	0.4	0.9	2.5	4.2
3.1	0.3	0.5	1.7	0.7	0.5	4.4	0.6	4.9
1.2	5	0.6	3.7	2.6	1.8	1.8	14.2	1.3
1.6	0.4	15.8	13.7	1.9	1.3	2.8	3.8	0.5
1	1.3	1.7	1.8	10	1	16.9	1.7	1.4
0.7	1.3	2.5	1.7	9.4	3.6	5.7	11	1.3
1.1	3.3	3	1.5	7.1	0.6	6.6	4.9	1.9
0.9	6	3.7	4.8	3.9	3	1	1.3	6.1
1	7.3	9.7	6.8	0.7	0.7	2.2	0.9	1.5
4.8	6.2	0.4	1.3	10.4	10.4	1.5	4.1	18.1
1.6	2.5	0.6	1.4	1.1	15.2	2.7	4.4	23.2
2.5	0.6	3.4	6.5	3.7	2.4	2.3	2.7	9.2
2.4	8	1.1	0.3	5.2	4.1	1	0.6	1.3
1	2.8	4.3	1.8	7.7	0.7	1.6	2.7	1.5
1.2	5.3	5.5	0.5	7.3	2	4.1	7.3	1.3
1.1	5.2	0.8	0.6	5	1	12.5	1.7	1.9
0.6	7.2	0.9	0.9	1.2	3.4	2	3.1	1.1
5.8	4.8	1.2	0.3	0.5	3.2	3.2	1.1	2.3
4	1.2	10.5	2.6	1.1	1	0.8	6.6	1.2
1.5	0.8	19.4	0.5	2.5	1.1	10.6	1.5	5.9
0.3	0.9	12.1	0.4	1.5	5.7	28.9	2.3	0.5
1.8	4.2	2.3	1.9	1.1	0.5	2.6	1.4	0.5
0.6	1.3	3.2	7	1.2	10.3	0.5	1.9	2.9
1.6	2	1	0.5	0.9	8.3	4	1.5	22.2
0.6	2.1	0.5	8.4	0.6	0.2	9.6	0.7	3.4
0.5	8.1	1.9	8.7	4.1	4.2	0.3	0.6	7.8
0.7	12.6	28.7	6.9	0.9	17.2	5.8	4.3	0.6
0.8	4.8	6.4	1.4	11.6	20.9	4.1	1.3	1.5
0.9	2.3	0.6	2.4	2.3	0.5	4.7	1.2	3.8
0.9	2.8	0.5	0.9	1.3	0.7	6.2	7.1	28.2
3.2	3.7	6.6	4.7	3.4	0.5	1.2	13	1.1
0.8	3.6	0.9	0.3	3.8	6.9	12.6	1.4	2.1
1.4	4.7	1.3	7.1	3.1	0.4	8.6	3.7	5.5
9.3	1.9	37.5	1.4	1	46.3	0.7	2.2	23.7
3.6	2.9	0.7	0.8	13.2	0.9	1.2	29.5	3.6
1.7	1.1	1	1.3	5.1	1.9	10.7	31.1	5.2
0.7	1.7	0.5	0.7	3.1	2.6	24.4	11.6	3.3
29.2	0.8	0.7	2.1	0.6	0.5	6	1.7	2.9
1	0.8	0.5	3.2	0.4	2.7	48.3	20.7	5
0.2	7	4.1	10.6	31.5	2.6	32.1	2.2	4
0.8	8.6	9.7	19.2	13.4	0.8	7.1	0.6	2.5
9.4	4.5	5.4	8.3	1.9	0.4	4.8	0.6	3.6
9.6	0.9	0.5	12.5	0.7	0.5	1.2	1.1	0.9
3.6	1.5	17.3	4.3	0.9	2.9	2.8	0.8	0.3
1.3	2.7	14.7	1.3	0.4	1.1	3.9	5.4	6.1
0.8	2	12.5	7.6	4	4	2	5	16
20.2	1.2	17.5	2.2	7.4	4.4	5.2	0.8	12.9
0.9	1.6	8	1.4	14.3	3.8	5.8	0.9	12.3
2.4	3	8	0.8	2.3	2.2	4	0.9	4.3
0.8	1.7	23.5	2.8	1.2	29	1.6	0.6	1.9
3.2	5.2	1.8	34.1	9	44.9	0.8	2.4	1.1
1.9	8.2	8.3	2	0.4	43.2	12.1	0.7	1.3
2	1.1	0.6	3.1	25.3	1.3	0.8	1.1	6
1	1.5	25.9	10.2	6.6	9.1	2.6	40	3.4
10.9	0.7	0.6	11.7	5.9	0.8	0.5	0.8	5.2
2.3	1.2	18.8	9	1.2	17.3	1.1	1.3	22.9
1.1	1.9	4.2	6.5	6.4	7.5	0.5	1.5	12
1.9	6.1	2.7	3.4	2.7	2.4	0.4	3.1	19.8
1	6.5	3.7	4	17.7	2.1	14.7	0.7	13.4
0.8	1.5	3.4	3.7	22.6	6.7	0.3	0.4	7
0.7	6.8	0.4	19.3	4.4	1.7	5.3	4.1	10
0.7	1.8	26.7	6.4	1.7	0.6	3.2	0.9	2.3
1.6	3.5	1	2.9	3.9	0.3	6.7	1.2	28.7
0.5	2.5	19	2.7	2.2	6.3	2.3	0.7	7.2
3.7	1	0.9	2.1	1.4	0.5	4.7	0.9	3.1
0.5	0.8	0.9	2.2	0.4	4.2	0.4	8.2	1.1
5.8	0.3	2	2.1	0.4	11.5	48.7	0.4	1.5
1	0.7	3.4	1.9	1.3	2.4	31.6	0.6	1.7
0.3	9.8	3.3	4.6	1.9	1.2	2.3	0.7	1.1
0.4	1.5	1.9	10.5	4.7	20.3	0.7	0.8	1.1
1	31.3	1.4	1.3	7.4	9	0.3	5.5	2.4
1.2	4.3	1.1	4.1	7.7	4.6	0.6	0.3	8.1
0.4	2.7	7.6	0.5	32.2	2.9	1	1.7	14.8
1.6	8.2	3.1	28.2	0.7	5	6.9	1.6	6.5
4.1	6.9	2	1.7	0.2	11.8	2.3	5.4	24.1
3.2	1.7	2.2	3.4	2.9	3.4	1	2.2	9
2.3	1.3	2	0.3	4.5	12.2	1.7	1.4	2.6
0.5	23.4	6.2	1.4	1	1.5	1.9	8	11.7
2.7	4.6	4.3	7	4.9	2.2	3.6	1.4	12
1.8	9.4	8.3	19.6	3.8	2.3	3.3	18.6	3.2
0.5	5.3	8.8	14	0.6	1.3	7.4	4.4	2.3
2	0.6	3.1	0.9	1.9	5.8	2.2	8.6	1.5
1.6	11.4	4.4	1.1	1	1.2	9.7	4.2	9.8
2.4	5.2	0.7	0.8	4	0.8	14.9	1.3	1.3
0.8	1.8	22.6	10.5	2	1.3	7.4	4.5	2.7
1.3	0.4	2.9	15.2	0.5	59.3	16.7	6	1.7
7.1	1.1	1.3	1.3	8.7	2.5	6.4	0.7	0.7
2.1	16.7	21.8	1	1.1	1	14.6	14.1	12
6.8	3.2	3.5	4.7	0.8	1.8	3	0.5	5.3
1	4.6	1.2	1.3	2.9	4.9	1.1	0.6	11.2
0.9	0.9	13.9	1.9	21.7	0.3	0.8	0.8	1.4
0.6	0.9	35.4	1.9	13.8	0.2	1	3.8	10.3
0.5	3	1.9	5.4	12.4	4.3	0.9	1.5	14.3
2.8	2.6	18.7	2.9	5.3	1.4	12.2	1.5	4.3
0.5	2.6	13.9	0.7	8.8	0.3	4.5	11.1	0.9
0.3	1.8	0.6	13	4.1	16.5	11.3	2.9	1
0.5	13.9	2.2	1.9	4.2	10.7	22	32.5	1.2
0.6	0.8	7.5	4.4	11.6	1.3	8.4	37.2	8.7
0.8	27.6	13	0.6	5.4	5	15.5	3.2	18
14.7	11.2	0.6	0.6	4	3.4	13.8	6.4	4.4
5.1	1	0.6	1.9	12.5	1.2	1.2	2	35.5
2	1.7	3.6	2.2	16.7	1	4.2	5.8	10
0.6	2.2	4.7	2.7	20.5	1	4.6	4	0.9
6.8	0.5	0.3	8.7	1.8	1.6	0.5	3.7	1.1
0.8	0.7	0.6	18.5	1.3	2.2	1.2	1.2	1
2.7	1.5	1.9	1.3	1	13.2	0.3	9.7	2.5
0.8	1.8	1.5	0.5	8.3	5.3	0.2	5.8	3.1
0.7	1.1	16.3	2.8	1.4	0.5	0.8	8.3	3.2
0.7	22.6	9.4	2.2	7.9	0.2	2.8	1.4	0.7
1.1	1.5	0.3	6.3	16	1.3	57.5	0.7	0.8
0.2	0.7	1.3	13.9	4.3	9.3	16.2	6.3	7.1
1.5	1.1	3.1	2.4	12.3	0.8	1.3	14.7	0.6
1.5	2	8.4	12.8	0.6	3.5	3.9	3.4	2.8
4.8	0.4	4.8	15.6	5.3	3.9	0.5	5.7	1.1
2.8	0.9	0.7	7.4	2.9	10.5	19.9	0.3	5.7
1.8	7.7	2.3	12.3	0.7	4.8	0.5	1.8	0.6
2.5	3	1.1	3.8	10.1	1	0.7	3.8	1.1
0.8	8.3	10.4	6.7	0.3	1.7	0.3	2.2	1.3
3.9	1.7	0.5	0.5	0.7	2.2	46.4	0.3	0.5
0.4	1.5	2.4	1.7	0.3	1	14.9	1.5	11.9
0.7	0.8	8	11.9	0.4	3.2	0.9	0.6	3.5
0.5	1.3	22.8	13.9	4.1	0.4	0.8	3.8	3.1
1.2	5	1.2	4.3	0.4	1.2	3.7	0.7	9.2
0.4	1.4	4	0.9	17.3	1.3	2.4	0.4	4
1	2.3	1	4.1	9.7	1.1	34.6	6	1.2
0.8	0.7	11.9	4.6	2.8	0.3	1.9	5.2	13.5
1.8	0.5	12.8	6.3	1	0.5	1.5	1.2	0.4
1.6	0.5	1.2	2.9	1.4	0.4	2.8	2	0.9
6	0.5	1.1	2.3	0.4	33.2	9	13.5	1.2
1.1	0.5	2.9	8.7	1	7.1	6.9	1.7	53
1	0.5	1.4	1.3	4.1	14.8	2.5	2	3.6
2.4	0.5	4.4	5.6	16	15.3	3.4	0.8	3.2
2.7	0.4	3.2	5	3.2	1.1	7.5	1.6	3.6
12.9	8	6.6	4.8	2.8	2	0.9	2.8	8
1	4.6	13	6.7	3.5	3.6	10.2	0.5	10.5
10.3	2.4	1.6	3.7	1.4	9.3	4.6	5.6	5.8
2.2	2.2	0.5	3.8	8.6	5.8	2	11.1	2.9
1.2	4.3	1.6	2.1	5.8	16.4	34.2	5.6	2.4
1.3	1.8	9.3	8.7	0.8	19.3	23.4	3.1	3.4
14.6	0.9	48.7	21.5	1.2	7.1	20.4	1.4	1.8
2.5	1.3	22.2	12.4	16.8	1.8	0.3	9	2.9
0.6	1.5	7.4	3.4	17	2.7	0.4	3.5	3.1
0.3	6.4	5.4	2	2.2	4.3	0.7	3.6	3.3
3.2	3.9	7.7	0.5	1.4	0.6	4.6	2.7	3.9
2.6	2.4	7.5	13.7	0.8	0.8	1.6	8.8	19.7
0.6	6.9	8.7	1.2	2	1.2	0.6	6.9	13.3
0.4	10.6	0.5	4.1	0.6	2.2	11.7	6.3	3.2
2.2	1.4	1	6.7	6.4	2.6	3.1	0.9	1.7
6.8	2.3	0.8	5.6	0.8	5.3	1.5	3.6	2.1
4.4	12	1	1.5	1.1	1.4	0.3	1.6	9.5
1.7	16.2	0.3	4.4	0.4	3.9	5.4	9.7	0.8
3.7	1.3	5.2	2.9	3.5	4.7	1.5	1.3	0.7
5.4	3.4	1.6	1.2	5.5	1.6	21.9	1.4	2.5
0.8	5.3	4.6	1.3	6.6	2.5	10.9	1.5	0.5
0.8	1.2	0.7	1.3	2.2	22.6	2.3	1.2	1.1
0.8	0.4	1.1	10.4	2.8	29.4	0.5	2.8	1.8
18.8	0.8	93.5	2.5	0.6	9.3	1.1	31.1	11.9
27.9	3.2	3.6	2.7	12.7	8.9	6.9	1.1	7.9
0.8	0.7	1.6	1	0.5	9.4	0.6	1.5	3.6
0.3	0.8	2.1	0.9	0.4	13.5	0.4	0.8	18.5
0.7	4.2	14.1	0.9	1.2	25	3.7	1.5	1.1
0.7	8.7	13.8	0.9	0.7	0.1	2.8	9.9	0.5
0.7	0.5	4.7	2	26.9	2.5	1.4	18.3	0.4
1.6	4.3	9.6	4.9	0.4	1.6	1.8	0.9	0.3
1.7	0.7	17.2	0.9	15.7	4.3	1.9	0.9	4.6
0.7	4.2	2.6	14.5	2.6	0.4	1.7	0.6	0.6
5.6	2.1	4.3	7.6	0.8	1.7	1.3	6.8	0.5
4.6	9.4	7	2	1	0.7	11.4	2.2	30.4
1.5	2.1	0.8	1.7	0.5	5	0.8	1.2	10.2
0.8	1.2	0.4	0.6	1.2	1.9	2.2	0.7	1.4
0.8	18	2.2	1.1	6	1.3	7.2	0.4	11.7
1.8	16.8	11.2	3.5	1.4	4.3	2.9	0.2	1.3
5	5.1	31.7	9.6	7.3	0.6	2.5	0.3	1.3
6.7	14	1.8	0.4	0.1	5.3	12.4	0.4	3.3
1.3	27.1	6.1	11.2	1.5	0.1	0.9	0.5	30.1
0.7	2.4	1	8.3	1.1	1.8	1	9.3	45
0.9	43.3	1.9	3.3	0.7	9.5	22.1	7.1	0.5
2.4	9.4	6.1	0.9	0.7	11.7	13.8	14.1	0.2
0.9	2.7	5.2	2.8	17.9	9.6	6.1	1.4	0.6
2	10.5	0.4	1.7	14.3	2	1	2.5	0.3
2.2	2.4	1.5	2.3	43.4	0.6	3.1	6	4.1
2	3.3	13.6	1.4	19.5	1.4	1.9	0.8	8.8
18.1	0.9	22.2	6.2	0.5	0.9	0.9	2	2.8
1.6	0.4	2.4	1.1	1.6	1.3	6	7.4	2.4
2.4	1.4	2	10.6	0.9	0.6	3.5	4.6	17.3
1.2	2	1.3	20.3	0.6	3	2.3	4.9	0.8
1.2	1.6	1.3	5.4	0.3	0.8	2.6	7.9	1.4
1.4	1.8	6.3	26	3.4	3.3	13.7	1.5	36.2
13.3	14.8	29.7	3.8	2.8	1.4	0.7	5.1	16.9
19.8	1.1	5.4	1.3	4.5	0.4	1.5	1.4	0.7
52.1	1.2	1	4.9	0.4	0.5	14.8	4.3	0.7
0.5	6.6	1.3	15.4	0.5	0.4	6.4	1.3	1.5
0.2	4.4	1.2	9.4	0.5	0.5	1.2	3.8	0.4
0.4	1.6	1.1	8.1	5.6	0.7	2.1	7	3.3
2.1	20.1	9.1	3.5	4.1	1.8	3.3	6.5	9.8
0.7	16	5.7	2.9	1.6	0.8	0.8	1	1.7
0.8	10	32.5	5.7	3.7	0.5	0.8	5	4.6
1.4	24.2	12.7	1.9	7.4	3.1	0.8	11.7	3.7
0.9	1.9	4.3	11.1	9.7	0.9	0.4	1.2	9.3
2.3	15.3	1.4	1.6	9.8	63.9	4.9	0.6	53.7
2.1	10.7	3.1	0.7	0.8	1.5	1.8	0.2	12.4
4.9	7	21.7	1.3	0.3	1.1	0.7	1.8	7.4
0.5	7.1	2.9	0.6	2.3	0.6	22.7	5.9	18
0.5	4.8	0.4	0.5	1.9	0.6	0.4	6.4	9.8
0.4	8.6	3.9	0.5	2.4	2.6	4.1	2.5	1.3
2.9	8.8	0.6	2.4	46.1	2.1	6	0.9	4.3
0.9	13.3	2	10.7	17.1	2.5	11.6	7	8.1
4.1	0.8	3.7	5	11.1	1.1	0.7	3.7	1.3
0.9	2	1	8.8	6.9	1.3	21.1	1.5	4.5
0.7	3.8	0.5	4.8	1.3	2	10.9	8.9	7.3
2	4.6	1.6	12	2.4	3.1	4.9	2.1	1.1
1	8.3	2.1	4.5	1	7.8	29	16.8	2.6
1.9	1.7	6.2	1	2.6	5.8	17.2	4.5	3.1
0.6	0.9	1.8	1.7	3.8	0.8	9.8	2.2	3.8
0.5	2.7	2.2	6.9	0.5	14.1	13.7	0.6	4.9
0.4	0.9	7	9.2	0.7	1.1	4.8	0.6	66.8
0.2	1.8	6.2	8.2	1.3	0.5	4.9	5.1	4
3.7	0.8	5	1.5	2.3	5.5	1.8	2.8	7.1
1.9	0.6	2.1	1.9	12.7	1.3	0.4	0.9	1.7
0.8	0.7	8.8	1.6	0.4	4.8	2.9	1.6	3.2
1.5	0.5	4.6	0.7	0.2	2.9	10.2	1.2	2.4
4.8	2.5	1.5	7.1	2.6	2.1	47.4	1.2	1.4
17.8	0.5	0.8	1.6	1.7	0.5	1	1.1	8.3
0.8	0.4	10.2	1.2	0.3	1	32.6	3.1	4.4
12.5	0.7	6.8	0.6	3.9	0.4	28.1	1.9	3
0.6	0.6	0.3	1.5	2	5.6	2.4	5.2	1.4
0.6	0.5	1.4	6.4	22.3	92.3	2.1	0.9	0.8
0.4	2.5	0.8	1.6	5.6	4.6	2.2	2.5	1
0.2	3.2	2.1	4.4	8.2	2.6	3	15	1.5
4.8	1.8	1.9	2.3	1.4	1.1	11.9	3.6	14.7
1.9	1.2	6.6	1	2.3	1.8	32	1.7	2.3
0.4	5.8	1.2	1.3	0.5	9.4	0.4	7.7	5.2
0.8	11.4	17.9	1.2	0.5	0.8	0.6	3	1.7
0.7	32.6	3.6	4.1	2.4	2.1	0.2	0.8	2.7
1.1	4	0.7	1.8	11.9	0.2	1.8	0.7	1.4
3	3.3	2.7	19.1	0.8	0.2	7.8	7.1	1.1
0.6	2.8	2.7	1.4	0.6	0.2	1	4.2	14.4
4	2.3	1.1	4.5	0.8	4.4	3.3	9	2.4
1.4	12	4.6	2.5	9	0.5	28.2	21.8	42.3
1.2	1	0.8	14.8	0.9	1.1	9.8	1.7	14.2
2.1	8.2	8.1	1.7	0.4	0.8	1.2	14.4	1.5
0.9	1.5	1.2	0.3	0.4	0.4	27.6	2.7	3.1
4.4	0.5	0.5	10.6	1	0.5	10	3	6.3
0.7	1.2	17.5	1.4	0.4	4.5	12.1	0.4	0.9
0.3	4.6	13.9	0.6	0.4	4.2	32.8	5.3	2.2
0.2	0.3	0.5	1.1	2.4	0.8	2	19.1	2.3
0.1	0.5	5.7	0.7	2.9	0.8	13.7	4	1
0.9	5.3	46.8	2.9	0.1	0.5	4.2	4.9	0.7
0.9	1.1	0.7	8.6	3.3	1.3	0.5	3.7	0.8
11.7	15.9	0.8	1.9	3.1	1	12.3	0.9	2.7
1.4	9.2	4.2	11.6	5.4	0.4	20.4	4.8	19.4
0.5	2.2	9.8	20.7	3	3.6	1	3.7	1.4
1.8	3.2	0.9	4.5	0.4	0.7	1.2	3.9	1
0.7	2.7	16.1	1	1.1	0.7	20.5	24.4	1.2
1.2	3.8	5.8	0.8	1	1.7	21.6	5.6	1.2
0.7	18.9	3.5	0.5	14.4	0.4	12.3	3.6	4.4
0.3	18.6	1.6	1.5	1	3.3	2.4	8.1	1
4.5	8.3	5.1	0.7	7.8	1	1.5	2	3.6
0.9	4.4	2.4	0.7	6.2	23.5	2.6	4.2	3.1
1.6	1.7	24.3	0.4	1.9	3.5	19	0.8	11.9
0.5	1	10.2	44.9	0.9	6.6	13.9	0.4	0.7
0.1	1	0.4	7.9	11.3	7.4	0.4	34.3	1.3
0.6	1	8.3	9.9	1	11.9	5.7	0.4	5.2
1.7	7.3	3.3	10.4	5.2	5	0.6	0.5	0.9
1	12.2	1.3	1.1	18.4	4	4.1	0.6	0.8
0.4	1	2.7	1.3	11.8	29.5	1	0.5	2
3.6	14.7	6.2	0.5	8.8	9.4	0.4	1.4	4.2
0.4	0.8	5.8	1.2	0.3	27	3.7	1.9	0.8
1	4.3	3.9	1	41.1	5.3	4.2	10.1	0.9
0.5	7.1	4.9	0.5	1.6	14.5	1.9	6.7	16.3
1.6	6.7	0.3	0.2	0.9	6.1	10.1	5.8	14.3
4.4	2.3	1.2	3	0.6	15.8	0.4	10.3	2.8
0.8	3.9	1.5	2.8	0.8	6.3	1.9	1.5	9.1
0.4	6.3	3.8	0.9	29.9	4.8	13.5	8.4	12.9
0.7	1.2	5.2	4.9	1.3	0.6	2.6	4.5	6.4
0.5	0.6	15.2	8.4	4.9	0.9	1	3.6	7.4
2.4	6.9	3.8	4.6	0.6	0.2	2.2	11.2	30.4
1	1.1	56.1	14.6	1.8	0.6	3.1	7.6	1.9
1.6	1.8	2.3	5.3	17.8	3.4	1.9	8.7	3.4
0.6	0.7	0.8	2.3	4.5	0.3	10.7	2.4	6.9
2.7	1.2	1.8	29.7	0.7	0.2	5.2	2.8	1.7
6.3	1	13.9	2.3	9.2	0.8	4.7	2.4	6.1
1.4	5.2	2.7	6.1	2.4	1.9	0.2	0.3	17.7
0.5	16	1.2	5.3	7.6	1.9	19.5	0.5	0.8
1.6	2.5	15.3	2.1	4.6	0.5	2.8	4.5	1.5
0.9	1	1.2	20.3	5.4	2.1	3.4	0.5	1.2
0.6	1	1.6	22.6	5.5	14.5	3.1	0.8	4.3
16.6	1.9	3.1	0.2	0.3	7.7	1.4	1.2	3.2
1.8	1.3	2.2	0.2	3.6	9.7	1	2.4	1
1.9	0.4	6.7	36.6	0.6	16.3	9.6	2.9	0.2
1.3	0.8	17.3	11.5	0.9	0.9	1.1	1.9	0.6
25.6	0.6	3.2	2.4	0.8	1.3	0.8	0.5	39.6
2.6	0.5	1	1.4	1.1	0.4	27.8	4.9	13.2
1.6	0.4	1.2	2.8	4.4	0.5	1.7	2.5	2.7
10.5	0.6	0.8	0.6	3.6	0.5	1.2	0.4	1.7
0.5	1.8	0.2	0.4	7.9	0.4	0.6	5.3	19.3
1.2	5.9	18.2	0.9	2	1.9	11.8	3	6
1.1	4.2	5.7	1.3	0.3	0.1	1.1	1.3	1.7
0.9	1	5.5	0.8	0.9	0.4	2.4	8.2	4.9
2.2	0.4	4.8	1.7	1	3.8	40.1	32.8	16
0.6	6.1	6.2	52.7	0.8	7.2	1.6	1.8	5.7
0.7	1.1	10.7	8.8	1.2	1.6	26.1	1.2	9
0.7	9.2	5.4	3.5	3.7	2.8	0.8	2.6	1.7
0.8	2.5	5.3	1	14.3	2.2	0.4	2.3	1.5
12.1	15.2	14.3	1	13	1.8	2	6.7	1.3
1.4	31.7	3.9	8	6.8	2.2	1.5	4.9	5.1
1.3	9.4	3	1.6	0.3	6.3	7.6	0.6	8.3
0.6	6.2	2.6	1	0.4	4.7	9.2	0.9	0.6
0.2	0.6	1.5	0.7	9.6	1.4	0.4	10.7	1.6
0.7	2.6	3.5	1.9	0.9	1	6.7	1.2	0.8
0.2	1.8	1.5	0.9	4	17.1	5.7	3.3	4.3
0.4	5.2	1.3	3.3	2.7	3.4	0.5	10.9	3.6
0.4	0.9	7.8	1.9	1.5	27.8	0.9	1.6	14.7
0.6	1.2	1.1	14.4	1.3	0.2	6.5	3.8	2.2
4	1	1.1	6.5	4.7	0.8	2.1	0.5	1.4
2.9	16	0.5	2.3	8	6.2	7.2	0.9	1
0.7	1.4	1	7.6	0.8	1.7	0.7	0.9	8.6
9	5.5	2.3	2	2	11	4.4	1.2	4.3
3.3	4.4	16.3	1.6	0.5	11.6	1.6	0.7	28.2
0.6	1.5	0.3	1.6	0.4	3	0.6	1	1
0.5	1.3	0.8	10.1	3.7	3.2	0.2	2	1.2
0.9	1.5	0.9	1.7	1.7	1.4	1.2	6.8	1.2
46.7	4.6	3.2	0.7	1.4	2.5	0.3	10.9	0.9
58.5	4.2	2.8	0.4	2	4.9	1	14.6	0.9
0.7	6.6	2.4	1.3	0.6	2.7	2.6	7.3	1.1
1.1	5.1	2.7	0.7	1.5	1.8	6	1.7	0.8
2.8	29.4	0.4	0.7	6.1	7.1	16	5.4	5.3
14.3	24.7	9	0.8	8.5	1.7	9.6	1.4	43
1.2	2		3.5	18.2	4.7	1.2	19.1	2.9
1	3.9		1.7	8.7	0.3	0.2	2	48.3
0.5	1.1		0.4	1	2.5	17.8	0.7	12.7
1	9.5		2.3	11.2	2.4	2.4	0.1	29.8
1	2.2		3.2	2.4	1.5	3.9	0.5	65.2
1.1	6.1		0.9	0.7	0.3	20.8	1.6	43.3
1.6	13.2		1.1	0.3	1.6	7.2	4.7	23.3
1.8	1.3		1.3	4.4	2.7	3.9	4.7	2.1
1.3	1.5		1.1	4.4	0.2	6.2	2.1	1.3
0.2	2.8		41.7	4.5	0.3	5.1	43	1.5
13	1.3		5.7	0.3	0.3	1.6	7.6	0.6
0.3	3.4		3.3	2.1	0.5	4.9	3.4	7.1
5.6	1.5		1.2	0.5	0.3	75.1	0.9	3.9
0.6	0.8		1.7	1.8	29.8	2.8	1.5	1.6
10	0.8		1.6	1.7	12.4	29.9	0.9	3.8
0.4	3		1.8	0.4	6.7	1	4.3	28.2
0.9	0.7		4.8	0.7	0.8	2.4	4.9	14.2
0.7	2.3		2.7	3.1	23.6	8	11.2	1
1.6	0.9		2.8	3.6	18.4	22.9	3.2	2
0.4	1.3		2.4	24.8	9	3.6	8.7	20.4
1.4	15.3		1.5	101.2	2.8	2	10.8	10
0.3	1.5		0.8	0.6	32.7	7.4	1.5	1.1
0.5	0.8		1	1.7	1.3	3.6	3.2	0.7
0.7	1.1		0.5	0.5	4.2	15.3	24.4	8.6
0.4	10.9		2.7	1	4.2	8.3	1.4	5.7
0.2	8.9		0.7	0.9	1.4	1.7	0.6	3.2
0.7	3.5		0.5	0.3	1.7	0.3	0.7	5
0.8	4.8		1.5	5.6	15.3	2.5	3.3	1.4
0.8	1.9		16.3	1	1.1	0.9	14.7	2.6
0.6	0.4		7.9	0.9	1.1	0.1	7.4	1.1
2.2	5.9		0.4	0.6	8.2	9	1.5	6.5
5.3	6.1		0.2	0.5	2.3	11.7	1.1	31.2
2.9	9.2		2.7	12.7	0.5	6.3	2.8	2.3
0.7	2.5		0.4	1.2	0.8	0.3	1.7	3.9
0.2	1.7		15.9	5.6	4.5	4.5	4.3	11.7
0.5	0.7		5.8	10.7	1.1	0.8	0.3	2.4
0.4	2.4		5.2	22.3	1.5	0.6	1.1	18.8
1.3	0.9		12	0.7	4.3	4.6	0.4	4.7
1	0.6		2.9	0.7	5.9	0.4	12.2	1
0.7	1.3		0.7	14.5	0.6	14.4	3	13.7
5.6	7.4		2.1	5.5	0.7	11.7	5.5	0.6
2.2	3.2		1.8	1.5	1.5	0.9	3.5	1.6
9.2	18.3		0.9	3.4	1.5	9	1.2	0.6
2.2	4		0.6	6.4	1.1	5.6	3.1	1.5
3	3.6		0.4	0.6	1.8	6.7	23.4	18.7
8.3	16.4		3.5	0.6	0.9	3.6	38.6	3.4
3.6	2.7		6.5	4	1	1.5	1.5	0.4
0.4	4.1		16.8	0.1	3.5	9.8	5.1	57.8
3.9	1.3		1	12.5	4.7	9.5	2	4
2.3	14.2			0.4	3.7	5.1	0.6	0.5
0.7	8.1			15.5	2	1.5	2.4	0.2
0.4	3.6			5.1	0.3	4.4	34.8	0.6
1.1	12.8			1.8	0.3	3.3	5.9	0.6
5.3	1.2			1.3	1.1	3.3	0.8	1.1
1	0.4			29.1	0.5	11.5	7.2	1.1
0.8	0.6			5.2	26.9	26.9	9.5	1.3
1.7	1.1			0.8	2.4	1.3	4.2	1.2
12.4	0.7			3.1	9.9	1.4	12.1	1.1
1.6	0.5			0.5	4.1	8.5	38.8	3.1
1.1	1.2			54.8	11.3	1.1	0.3	9.5
1.5	13.4			4.5	8.7	5.7	0.4	0.7
1.1	17.3			1.8	0.7	2.3	1.1	4.3
0.6	2.2			20.9	1.3	20.2	15.6	4.2
1.1	14.2			0.9	0.4	0.9	4.1	2.6
0.5	4.1			0.3	0.9	37.9	4.7	1.4
1.8	2.5			6.1	1.2	4.9	1.6	6.2
0.9	21.2			5.9	0.1	0.8	1.3	0.7
0.6	10.5			31.4	0.8	0.4	8.5	1.5
1.8	1.3			12.8	3.4	4.2	4.4	15.9
0.8	1.7			4.4	4.9	4.2	2	5.3
2.8	1.4			8.8	2.3	42.4	32.4	0.8
0.6	1.1			1.7	3.4	10	41.4	1.2
0.4	8.5			1.2	1.3	5.2	20.1	7.1
4.6	0.7			8.1	3.1	2.1	1.6	14.5
4.2	0.8			22.3	1	0.8	6.2	0.3
0.8	1			1.8	0.2	0.8	1.3	0.7
0.7	0.5			0.7	0.4	7.6	3.8	4.3
1.3	5.6			1.1	0.6	4.4	11.7	14.4
0.6	54			1.8	3.8	3.8	4.4	1.4
1.9	4			8.4	2.9	28.5	0.5	1.1
0.6	2.8			27.4	9.4	7.9	0.3	0.5
0.1	6.2			1.4	1.3	2.6	0.4	0.8
1.9	2.2			2.5	10.9	2.1	2	0.3
0.3	11.4			1.4	8.3	1.9	0.9	2.1
2.3	33.1			24.8	0.7	27.6	3.7	0.8
1.7	1.5			1.3	0.8	45	1.6	7.1
1.7	1.1			1.4	1.1	4.4	6.9	45.9
2.4	15.4			8.8	1.2	3.1	11.1	7.5
0.9	2			5.9	0.2	8	9.2	0.6
5.7	2.5			0.7	0.4	22.6	4.1	9.9
9.2	5.7			1.7	0.4	10.8	1	0.9
2	5			24.3	15.6	8.2	9.3	1.3
0.4	10			18.5	0.4	0.8	2.1	0.9
5.4	6.8			3.7	0.7	0.2	9	0.9
0.8	2.6			3.2	4.6	5.4	5.2	16.5
0.1	1.4			2	3.4	1.5	12.8	5.4
2	4.8			1.5	2.3	0.3	1	4.5
5.7	4.3			2.8	1.1	0.4	0.5	10.5
1.2	3.8			1	0.1	0.6	0.5	6.8
2.5	1.7			8.8	17.5	3	3.5	3.4
3.2	21.6			2.3	2	0.7	51.5	1.9
1.1	1.8			1.4	7	1.6	2.9	4.5
1.2	0.1			1.2	1.1	0.6	10.8	47
1.5	0.9			10.5	24.1	0.5	3.8	7.2
0.4	7.4			0.6	1.7	0.6	2.4	2.7
0.9	1.8			10.7	1.6	2.1	23.3	1.1
0.1	2.7			0.4	1.1	1.6	7.9	0.6
3.9	0.9			0.5	1.9	3.1	1.5	1.7
1.4	1.5			1	6.9	3.2	4.2	4
4.9	5.7			0.5	2.3	1.8	1.4	5.1
1.9	4.1			0.8	0.8	0.3	1.1	2
2.2	9.4			0.7	3.3	7.1	1.5	5
2.1	44.5			3	3.1	5.9	2.2	1.2
1.3	28.6			8.1	13.8	25.1	0.7	3.9
1.7	2.5			6.8	0.4	8.7	2.6	1.7
1.2	12.2			5.6	3.2	2.3	0.6	1.7
0.3	2.8			1.4	5.1	0.6	0.3	1.5
1.6	1			1	5.3	0.3	0.2	2.3
23.3	0.8			0.4	13.5	0.3	1.5	0.8
1.9	0.8			0.9	14.5	1.4	32.1	0.4
2	2.7			0.2	9.4	1.1	44.5	1.2
0.2	16.7			4.4	4.1	2.1	7.4	0.6
0.3	11			0.5	1.7	3.6	1.3	11
4.8	5.5			1.1	34.8	3	3.1	18.7
0.8	1.7			3.3	0.5	0.5	7.3	3
4.8	0.6			11.8	0.3	1.8	1.1	0.5
0.7	8.3			0.3	3	1.8	2	7.2
1.2	2.9			0.3	0.5	1.3	39.1	11.8
3.3	0.3			0.6	4.1	11.6	2.6	3.4
2.3	4.8			4.4	17.2	3.5	2.9	1.1
0.4	20.1			0.4	2.8	1.9	0.5	1.4
0.2	1.5			1	11.2	7.1	1.1	2.2
0.5	8.1			0.6	3.5	12.3	3.1	0.8
0.3	0.5			1	3	1.3	0.2	0.6
0.9	3.5			15	0.9	1.1	1.2	8.8
0.5	9.4			3.6	0.2	1.4	1.1	1.5
8.8	76.6			0.8	2.4	0.6	3.6	1.9
3.6	6.3			7	15.8	1.9	16.5	3.3
1	4.4			11.7	1.7	22.1	0.5	4
2.2	5			0.6	0.7	0.7	7	6.1
3.8	1.4			7.7	9.2	2.5	7	2.6
1.5	2.6			1.9	2.1	4.3	2	1.4
1.9	1.1			7.3	0.4	13.6	3.5	16.3
9.3	32.9			2	0.4	6.5	5.3	4
4.8	7.5			16.1	1.3	2.5	0.7	0.9
10.6	7.6			4.9	12.4	2.1	1.2	1.9
1.2	1.5			15.7	59.4	0.9	4.6	1.6
2.3	0.9			1.2	1	2.9	24.3	0.9
6.7	0.4			0.7	1.6	0.7		16.6
1.6	7			5.1	23.4	14.2		12.1
2.3	1.4			1.1	9.7	0.5		0.7
4.1	2.3			2.9	4.1	13.2		4.6
0.9	1			1.4	4	5.9		33.2
2.4	10.6			5.5	2.8	0.7		86.7
8.7	38.3			70.7	4.6	2.2		3.5
1.6	0.9			11.7	11.6	0.4		3.7
2	36.8			2	6	3		3.9
4.3	1.5			2	0.4	0.8		2.2
0.7	4.1			45.3	7.8	0.8		2.9
0.5	3.3			3.3	1.9	0.8		1.1
0.7	0.5			1	0.4	7.5		2.8
2.5	30			2.4	2	0.8		12.8
1.8	12.5			1.3	2.3	3.1		4.4
3.7	26			7.8	2.1	5.4		4.7
2.3	4.1			0.7	1.7	0.6		1.9
12	2.2			1.8	1.2	6.3		0.9
2.4	0.9			5.7	0.8	0.9		0.5
6.3	0.5			1.8	1.5	0.9		1.1
1.7	20.8			2.5	1.5	4.7		2.2
3.4	12.2			8.1	0.9	2.8		32.5
0.4	1.1			0.8	0.6	0.3		2.8
8.7	2.1			0.8	4.3	0.8		1.6
2.4	5			2.6	12	3.7		0.5
1.1	5.2			2.4	0.4	0.3		0.9
0.6	1.3			2.2	1.1	3.6		0.7
1.7	31.4			5.5	1.6	0.6		0.7
1.4	7			12.5	1	1.6		62.4
1.3	24.9			1.7	3.1	26.5		17.2
0.3	0.3			3.9	1.3	1.6		0.5
1.5	1.6			4.4	2.1	0.4		1.4
0.4	1.3			8.6	0.6	0.4		0.8
0.4	0.4			1.3	56.6	0.3		0.8
0.5	0.3			3.8	4.3	0.3		1.2
1.3	1			0.7	0.3	1.2		1.6
1.5	20.2			1	3.6	2.3		1.1
0.9	8.4			1.4	8.2	1.4		15.5
1	1.3			1.8	1.5	1.2		2.5
0.9	5.1			1.5	4.4	3.6		5.5
0.5	7.3			3	5.3	7.7		0.4
2.4	2.4			0.3	5.8	1.5		0.3
3.1	0.8			23.5	2.4	2.4		0.9
0.8	3			1	0.4	2.2		0.4
1.4	3.6			0.7	7.6	1.7		0.4
0.2	3.1			13.9	0.8	0.8		4.3
6	3.4			0.8	3.1	7.2		1.2
0.7	24			0.7	0.7	1.1		1.2
0.4	7.1			0.6	3.4	0.6		1.1
5	6			0.6	2.3	0.9		1.2
1.1	5.9			3.6	4.2	0.2		1.1
1	23.5			0.4	2.5	0.4		1.4
1.2	9.4			1	0.1	1.2		0.3
1.9	7.2			1.1	3.5	0.6		0.4
0.4	11.1			0.7	8.3	0.4		2.1
0.3	6.9			1	7.2	0.6		0.7
0.3	2.3				1.6	39.8		0.4
16.1	3				1.8	25.2		1.1
0.5	7.6				5.9	2.5		0.5
0.6	25.4				2.8	2.6		0.5
0.3	2				1.8	4.4		0.6
6.7	5.8				1	0.7		1.4
1.1	7.9				4.5	0.8		6.3
0.8	9.3				3.6	0.9		2.8
0.4	1.9				1.5	1		11.6
5.4	0.9				1	0.5		8
1.9	0.9				2.5	2.6		8.4
3	0.9				0.8	1.9		2.9
0.6	7.3				0.3	1.1		14
1.1	0.8				0.3	2		1.4
4.3	0.5				0.5	2.3		0.9
5.5	4.2				0.6	0.9		11.4
1.5	0.7				1.6	1.9		9
11.1	0.7				0.4	2.5		4.5
2.5	13.3				6.7	1		12.1
1.8	5.7				1.2	0.9		4.7
4.6	9.1				7	0.8		10.2
2.2	7.6				6	4.2		3.6
0.5	10.3				1.1	2		4.5
14	11.4				1.8	0.6		0.6
1.4	15.2				3.8	59.6		1.2
0.1	2.6				2.4	2.4		2.4
1.7	18.1				2.3	2.1		4.4
1.7	6.5				0.9	3.6		6.5
1.2	0.5				1.4	4.7		24.7
1.9	1.5				0.4	1		20.2
5.7	0.7				18.1	1.3		3
0.4	0.8				2.6	0.7		3.8
1	9.3				2.3	0.8		15.1
	13.5				22.4	1.3		30.3
	4.9				15.8	0.7		16.1
	2.1				1.5	1.6		8.2
	2.8				3.7	0.8		7.7
	1.2				20.2	1.2		4.2
	28.6				3.6	0.4		4.4
	0.8				14.8	1		4.9
	1.7				0.7	0.4		21.5
	3.1				1.2	1.4		7.6
	2				0.2	0.5		1.2
	14.1				1.2	0.5		13.4
	2.1				3.5	3.5		6
	1.1				0.7	1.4		3
	2				0.7	2.5		6
	17.9				1.1	1.2		7.3
	13.5				4.6	1		1.9
	23.2				0.7	0.8		4.7
	1.9				26.4	0.6		2.9
	9.3				2.9	1.6		5.6
	12.2				1.9	0.6		6.2
	1.9				6.8	1.4		7.6
	1.4				0.6	0.5		3
	1.9				1	1.3		5.6
	0.8				2.2	56.5		31.3
	2.9				3.2	1.3		38.3
	0.8				5.8	1.5		1.1
	1.4				1.9	7.3		2.5
	1.4				1	0.5		3.3
	4.3				4.3	0.4		23.9
	4.3				1.7	0.4		4.4
	4.9				20.7	0.4		1.6
	2				10.7	2.6		26.4
	0.7				12.6	0.5		3.2
	16.7				8.2	0.8		5.8
	3.4				20.5	0.8		2.5
	0.5				0.5	0.7		34.1
	20.8				0.1	0.3		2.3
	0.6				2.1	0.8		0.7
	1				3.5	0.5		1.1
	0.5				3.9	5.9		0.9
	0.6				2.2	13.2		5.4
	0.7				1	0.5		4.8
	0.6				5.8	0.5		9.3
	5				2.9	2.2		11.3
	0.6				0.4	9.6		12.1
	1.2				5	0.1		0.6
	1.9				3.1	2.7		10.7
	0.7				3.9	1.3		5.2
	1.3				2	2.8		1.2
	0.4				0.7	0.7		6.5
	8.1				0.8	1.8		1.4
	0.6				8.1	2.5		5.6
	5.1				9.9	0.9		97
	2.3				0.8	2.5		6.2
	5.2				2.8	6.8		2
	11.2				0.3	8.7		1.6
	0.4				5.7	7.5		1.3
	2.7				1.2	4.7		13.7
	4.4				5.5	0.7		0.7
	0.6				1.2	0.7		10.3
	0.8				11.6	1		9.5
	0.5				6.1	2.2		4.2
	11.3				3.7	1.8		6.1
	0.5				0.5	0.4		1.4
	4.9				0.9	4.4		9.3
	2.3				1.3	0.8		6.8
	1.9				32.6	1.8		2.6
	2.2				5.3	0.5		0.5
	4.4				28.9	1.7		3.3
	1				1.6	0.6		13.5
	0.5				6.1	0.5		4.3
	0.4				6.4	0.6		7.2
	63.5				17.5	0.3		6.9
	0.6				4	0.6		13
	0.7				0.8	2.3		2.5
	0.5				1.2	0.3		34
	2.1				7.1	0.8		4.4
	1.5				0.5	4.6		9.4
	4.8				10.4	0.4		17.2
	4				2	0.5		69.4
	0.4				4.5	0.6		6.8
	13.4				0.3			1.3
	3.6				2			4.2
	4.2				0.4			2.3
	23.4				22.5			2
	0.8				4.8			13.6
	4.1				4.1			3.9
	0.6				3.9			5.6
	8.9				5.2			2.8
	1.1				4.8			4.6
	1.3				1.9			1.5
	2.5				8.5			1.6
	0.9				2.5			8.4
	0.7				2.4			9
	3.9				1.9			14.1
	0.6				13.9			14.2
	3				4.5			4.5
	7.9				41.1			1.4
	1.2				5.2			7.3
	0.6				0.8			15.6
	3.5				14.8			1.1
	0.9				1.5			0.7
	0.2				13.9			2.8
	40.1				6.3			3.5
	0.8				27.1			9
	9.1				1.3			10.6
	4.8				43.5			1.2
	3.6				13.9			1
	0.8				8			2.5
	3.7				0.9			0.7
	1.6				5.2			0.7
	5.6				3.1			4.4
	10.1				9.3			2.3
	0.4				11.6			2.2
	5.3				6.7			0.5
	0.8				8.5			5.2
	2.5				4.4			0.7
	1.8				20.4			1.2
	1.9				3			1.4
	0.2				24.6			4
	0.9				3.4			26.3
	0.7				4.4			29.8
	2.9				17.2			1.5
	28.4				4.7			2.2
	4.9				9.7			22.8
	0.6				0.4			12.4
	1.6				5.8			32.8
	2.8				1.3			30.9
	1							2
	0.4							1.4
	33.3							3.8
	9.4							53.1
	5.1							1.1
	1.8							10.1
	5.5							2.4
	35.6							0.6
	2.2							1.6
	0.6							17.6
	2							2.3
	0.4							13.9
	3.4							2.3
	0.4							1.2
	0.4							2.5
	0.9							6.2
	12.1							0.5
	1.2							1.3
	0.8							1.6
	61.2							0.3
	8.4							0.1
	3.1							0.8
	3.8							0.6
	9.6							0.9
	1.8							3.1
	5.1							6.8
	1.2							4.7
	25.3							38.9
	6.5							3.1
	0.7							3
	1.3							1.8
	1.8							2
	1.1							2.6
	4.2							2
	0.6							2.4
	3							3.2
	5.3							10.8
	1.9							2.1
	2							9.9
	4.6							1.4
	2							2.1
	0.4							2.4
	0.3							1.1
	1.9							1.3
	5.4							1.7
	1.7							1
	5.3							1.3
	1.1							4.9
	1.3							2
	3.6							1.5
	0.9							1.1
	0.5							2.6
	5.1							25.1
	8.1							11.4
	14.7							3.8
	1.2							4.4
	0.3							2.3
	0.4							6.6
	2.6							1.9
	0.5							2.2
	1							4.7
	15.8							0.7
	4.2							0.7
	2.8							98
	3							3.4
	2.1							1
	1.5							3.3
	31.9							6.2
	9.8							0.7
	26.8							4.8
	0.4							0.7
	7.8							2.2
	2.3							2.8
	1.8							2.2
	0.9							3.9
	0.5							0.5
	0.4							1.7
	1							1.2
	0.5							0.9
	6							0.6
	1.5							0.6
	20.2							0.8
	0.9							0.7
	0.5							5.5
	1							5.6
	2.3							4
	6.3							0.7
	5.9							1.6
	1.6							0.6
	0.3							0.5
	0.7							19.2
	2.5							4.6
	6.4							2.1
	0.7							2.7
	6.2							8.5
	0.8							0.8
	24.4							0.4
	1.4							5.1
	1.3							0.9
	5.9							0.7
	42.1							5.7
	2.4							1.9
	1.2							4.3
	0.1							8.9
	1.8							2.1
	1							2.2
	18.3							0.6
	1.9							0.2
	7.6							0.9
	1.9							1.6
	3.6							0.9
	2.6							0.6
	1.6							0.9
	11							2.9
	1.3							1.3
	0.7							7.2
	0.9							2.9
	9.4							0.8
	5.8							0.2
	14.4							5.1
	3.6							1.4
	2.6							1.8
	6.6							2.4
	28.5							2.4
	12.4							5.5
	0.7							2.2
	1.1							15.7
	0.8							2.9
	12.8							1.1
	1.7							10.1
	3.3							3.1
	0.8							15
	0.6							4.2
	3.9							25.3
	1.2							0.4
	0.6							0.4
	8.3							2.6
	26							29.9
	1.3							1.2
	2.5							3.2
	1.9							2.1
	4.9							2.2
	2							4.1
	1.9							1.1
	0.5							0.7
	1.8							1.7
	1							2.6
	3.4							0.8
	5.3							2.3
	0.5							14.7
	6.8							9.1
	1.5							1.7
	1.1							24.8
	0.5							21.3
	1.3							1.3
	0.9							1.4
	1.6							15.6
	6.5							0.3
	3.3							2.9
	2.4							20.9
	0.3							1.4
	12.5							2.2
	1.8							2.1
	3.4							1.8
	0.9							5.4
	6.4							1.8
	11.5							5.9
	24.9							3.5
	0.4							2.2
	42.1							1.5
	9.3							1.2
	1.5							2.2
	15.6							1.1
	1.5							3.5
	0.7							1.7
	1.5							2.5
	4.7							0.8
	1.7							2.3
	1.3							0.8
	0.8							0.4
	0.6							0.8
	3.7							0.5
	23.4							6.8
	5.1							21.7
	35.9							4.7
	31.2							17.5
	4.3							2.5
	5.1							2.5
	6.4							1.6
	9							3.4
	8.6							68
	2.4							16.8
	0.6							2.6
	1.7							5.2
	2.1							4.9
	30.1							1
	2.2							0.8
	3.4							1.2
	8.1							0.9
	3.1							0.8
	0.4							0.6
	0.3							5.3
	10							1.7
	2.3							3.5
	3.9							2.1
	10.1							0.6
	23.1							0.5
	9.9							2.5
	10.1							0.8
	3.7							0.2
	24.5							0.5
	6.9							4.8
	1.1							14.7
	1.2							2.1
	0.6							3.4
	7							3.7
	1.1							1.3
	5.1							0.6
	6.2							1.4
	3.9							6.6
	2.6							8.3
	2.1							3.2
	1							1.1
	1.5							0.9
	1.1							0.5
	3.7							2.9
	16.5							1
	24.3							0.6
	1.3							14.4
	6.2							3.7
	13.8							2.3
	2.8							12.3
	0.8							0.4
	2.3							4.5
	1.1							0.9
	0.9							6.8
	2.4							3
	1.9							11.9
	9							0.5
	1.9							1.7
	2.2							0.6
	10.6							1.3
	4.3							0.9
	11.8							1
	4.3							0.7
	3.3							0.6
	1.6							5.4
	20.6							16.3
	1							2
	1.9							1.7
	1.1							1.1
	17.9							1.9
	8.4							0.8
	7.2							0.9
	1.2							4
	2.2							1.6
	0.5							3.5
	7.2							1.2
	10.8							3.2
	4.9							6.7
	4.2							4.9
	13.6							2.5
	0.4							1.5
	1							3.5
	0.4							3.7
	0.3							6.6
	0.1							1.5
	0.6							3.6
	0.7							1.3
	0.4							6.6
	1.1							1.1
	69.2							6.8
	4.6							4.5
	3.4							1.9
	3							1.9
	5.1							7.3
	14.2							1.1
	0.6							1.5
	0.8							4.1
	0.9							1.1
	3.2							2.4
	1.2							31.7
	5.9							3.5
	2							2.5
	0.5							1.6
	2.1							2.4
	2.6							19.5
	12							0.4
	3							0.3
	13.9							0.5
	1							1.4
	0.4							1.5
	0.1							1.3
	13.6							1
	2							1.3
	16.8							0.7
	21.8							2.1
	18.2							7.9
	1.4							4.6
	3.4							1.8
	38.7							6.8
	2.4							0.4
	2.7							0.7
	1							0.9
	9.2							2.4
	1.9							0.3
	2.2							0.7
	0.5							0.9
	2.4							3.6
	0.5							1.4
	0.6							0.6
	6.4							0.9
	0.4							0.4
	19							35.9
	1.7							1.7
	4							1.1
	2.9
	0.7
	1.4
	3
	7
	0.6
	0.7
	0.8
	4
	2.6
	1.7
	1.3
	12.4
	35.2
	5.2
	19.6
	7.9
	3.1
	4.2
	5.7
	0.2
	0.4
	0.2
	0.5
	9.2
	5.5
	0.5
	0.6
	0.6
	0.5
	2.3
	0.8
	0.1
	3.4
	0.5
	0.2
	3.7
	5
	4.4
	4
	3
	3.9
	9.7
	19.2
	6.4
	0.9
	1.5
	1.2
	0.9
	0.4
	4.1
	1.9
	0.8
	0.5
	13.8
	52.2
	9.7
	6.5
	1.3
	21.7
	7.2
	1.6
	0.6
	14.1
	18.9
	9
	0.8
	0.6
	7.2
	2.4
	10.8
	1.4
	0.1
	3.6
	7.9
	5.3
	1.9
	1.6
	4.2
	7.5
	1.4
	0.3
	0.6
	8.5
	8
	1.5
	25.8
	2.9
	0.8
	0.7
	2.4
	1.6
	2.9
	2.2
	19.3
	11.2
	6.7
	4.4
	1.5
	10.4
	2.4
	0.6
	0.6
	0.6
	1.1
	0.6
	2.3
	2.2
	1.7
	0.6
	0.9
	1.4
	5.4
	12.3
	4
	3.7
	6.7
	0.3
	21
	0.8
	4.4
	1.3
	4.9
	0.7
	1.7
	6.3
	2.9
	4
	2.4
	20.5
	3.8
	5.3
	9.4
	2.3
	1.4
	28.3
	0.8
	0.8
	0.3
	0.3
	7.9
	0.7
	1.3
	0.8
	16.6
	7.3
	1.2
	1.3
	1
	4
	1.5
	3.3
	0.6
	0.4
	0.5
	0.4
	14.6
	35.7
	22.2
	0.8
	0.6
	6.6
	4.6
	94.2
	5.2
	15.2
	4
	5
	42.7
	3.7
	13.1
	4.2
	26
	1
	2
	0.6
	1.8
	11.5
	0.1
	0.2
	19.8
	2.4
	1.5
	18.5
	2.2
	0.9
	2.7
	23.2
	8.9
	7.8
	6.8
	0.4
	0.6
	19.4
	53.3
	1.1
	5.3
	1.1
	5.4
	0.7
	0.5
	7.5
	16.8
	22.3
	6.9
	0.3
	2.8
	0.8
	11.4
	1.8
	1.4
	5.8
	7
	1.5
	1
	3.9
	6.2
	1.7
	2.2
	1
	0.2
	0.4
	1.2
	3.7
	2.2
	0.6
	13
	2.1
	1.1
	1.4
	1.1
	0.3
	0.5
	1.5
	4.5
	1.8
	0.9
	0.9
	1.1
	6.8
	2.4
	0.8
	0.7
	1.2
	5
	2.1
	1.8
	8.2
	1.8
	4.6
	4.4
	9.8
	4.4
	1.7
	1.5
	2.5
	1.7
	2.7
	2.9
	1.9
	2.4
	4.3
	4.3
	1.4
	0.3
	5.2
	3.7
	2.1
	12.3
	12.7
	9.7
	3.3
	7.1
	0.5
	6.1
	57.1
	4.9
	31.7
	4.4
	1.9
	12.8
	1.1
	0.9
	0.3
	4.6
	8.1
	4.9
	0.6
	4.4
	4.5
	35
	2.3
	23
	2
	1.1
	54.2
	0.9
	1.4
	0.4
	1.7
	1
	16.4
	0.9
	0.2
	2.4
	1.2
	1.1
	2
	1.3
	1.2
	7.4
	1.5
	0.9
	1.4
	28.4
	9
	10
	1.2
	4.9
	3.2
	12.5
	3.2
	1.6
	1
	0.5
	1.4
	0.7
	0.7
	0.6
[truncated: 53 more rows]
