# Supplementary material for: The Ndc80 complex bridges two Dam1 complex rings
Source: eLife. 2017 Feb 13;6:e21069. doi: 10.7554/eLife.21069 (PMC5354518; doi:10.7554/eLife.21069)
Supplement: Figure 2—source data 1. — DOI: http://dx.doi.org/10.7554/eLife.21069.011 [file elife-21069-fig2-data1.xlsx]

## Sheet: Figure 2A
Table of residence times (sec) for Figure 2A
wt Ndc80	wt Ndc80 + Dam1 mock	wt Ndc80 + Dam1 phos	wt Ndc80 + Dam1 6A phos
1.6	7	9.3	2.9
0.9	1.7	0.3	0.5
9.2	2.4	2.6	0.4
0.3	2.2	0.1	42.5
0.5	0.8	0.2	2.7
0.2	0.9	0.4	4
8.4	2.1	0.3	0.8
2.5	1.1	0.4	0.7
1.4	0.8	2	18.4
3.8	0.9	0.7	0.6
0.3	1.1	0.5	4
0.7	1.9	0.7	0.5
0.5	2.4	1.2	0.7
0.3	4.1	0.8	8.9
0.2	1	1.2	1.4
0.4	1.4	47.1	2.8
0.4	4.5	0.8	1.6
0.2	1.5	0.3	1.6
0.1	2	0.7	0.9
1	0.7	2.4	8
1.1	0.8	4	2.4
0.6	1.3	55.4	1.5
1.2	0.8	1.3	1.6
1.3	0.4	0.4	0.9
1.2	13.9	1.3	2.8
0.4	6.6	0.4	1
0.5	5	1.2	1
1.8	3.3	36.3	0.6
2.9	4.8	3.8	0.7
3.1	0.7	1.4	1
1.5	0.8	0.4	1.9
0.4	1.4	0.7	6.9
1.6	0.5	0.8	1.4
0.8	0.7	0.4	1
0.3	0.9	0.4	1.3
0.5	0.6	0.4	4.5
0.5	0.6	0.2	5.1
24.5	0.3	0.2	2.5
1.3	1.2	0.4	0.6
0.6	0.5	0.4	3.6
1	2.4	0.5	3.9
2.1	3.8	0.3	1.4
2.6	0.7	0.5	0.6
1.2	2.4	0.6	2.1
0.6	43.1	0.6	19
0.9	9.5	37.6	1.8
0.4	33.4	9.9	1
0.8	17.5	1.6	5.5
15.4	0.3	0.9	3.1
1.9	0.6	0.4	1.7
6.3	6.5	0.5	0.5
0.4	0.3	0.5	1.3
10.4	6.4	1.7	0.5
3	1	0.6	0.6
1.5	2	0.4	0.5
1.4	2.1	1.4	0.6
0.5	21.1	0.8	7.2
0.7	5.1	0.5	2.4
0.8	1.4	0.1	2.1
1.1	4.1	0.4	0.5
1.1	14	0.4	0.9
1	1.8	0.7	1.3
1.5	1.5	0.7	1.7
0.6	3.7	0.4	4.4
0.5	3.4	0.4	0.2
0.4	0.5	4.3	2.2
0.4	10.6	0.6	2.3
1.8	1	0.7	1.1
0.6	2.4	0.7	2.7
0.3	2.3	0.4	0.8
0.3	1.2	0.3	0.3
4.8	3.3	0.9	8.3
2.3	2.1	0.3	1.1
3.1	0.2	0.3	3.5
2.5	0.3	0.2	1
0.2	3.6	51.5	1.9
0.6	0.9	0.2	3.3
0.3	9.8	0.2	0.5
0.3	1.5	0.9	1.7
1.8	15.4	1	4
1.2	11	1	14.4
0.5	7.5	0.7	5.2
0.8	1.8	0.5	4.5
1.5	5.1	50.3	2.2
6.3	2.9	1.4	4.3
0.4	14.2	1	3.7
1.6	3.9	0.6	1.9
0.3	8.1	0.3	2.1
0.9	6.4	0.3	1.8
10.6	2.3	0.7	1.8
5.2	1.3	1.4	2.3
1.4	3.4	11.5	1.2
0.4	1	1	32.8
4.5	3.2	0.7	3
1.7	1.1	0.6	3.1
0.1	0.4	2.8	20.3
1	8	0.5	20.9
0.9	22.8	0.3	4.3
22.3	1.4	2.8	1.2
2.7	0.7	1.4	1.3
0.7	0.9	0.6	18.9
2.6	1.7	8.8	2.2
0.2	0.7	1.3	6.1
0.5	2.1	1.3	1
4.9	1.3	0.7	1.4
0.6	7.1	0.5	3.8
5.5	2.6	1.6	0.7
1.2	1.7	0.9	2.8
3.2	8.1	0.6	3.6
1.7	0.9	0.7	1.9
0.5	16.6	0.7	1.3
0.6	0.3	0.5	1.3
0.8	1.2	0.5	1.1
11.9	4.5	0.6	0.6
0.4	0.6	0.7	0.9
0.9	2.4	4.6	0.9
0.2	3.7	0.3	0.9
0.8	0.6	0.5	1.2
1	2.1	3.9	17.8
2.1	5.3	0.7	2.4
8	8.7	0.5	9.3
0.9	2.7	7.6	3.2
0.6	1.4	23.6	3.9
1.4	1.4	16.5	2.8
10.3	3	1.8	2.2
1.7	0.4	5.6	0.2
4.5	3.7	3.1	2.7
0.6	0.9	1.5	6.7
6.9	0.2	1.2	0.6
1.7	2.3	1	2.7
0.6	0.4	1.2	3.2
0.4	1.2	3	0.8
0.6	1.2	4.9	1.6
1.5	0.3	0.4	1.1
1.1	0.3	0.5	0.7
4.6	0.3	0.6	12.3
0.3	0.5	0.5	0.6
2	1.4	7	0.7
0.4	1.5	0.3	3.7
0.7	0.4	0.2	3.3
0.4	0.3	3.1	2.4
7.4	0.4	0.2	2.4
5.6	0.3	0.4	1.8
0.4	5	0.3	4.8
0.9	2.1	0.4	1.2
0.3	0.2	1.1	2.5
1	3.8	0.8	1.7
0.4	1.2	2.4	5.9
0.5	2.8	0.7	3.8
1.3	0.4	0.8	5.5
1.2	0.4	3.9	0.8
0.3	0.7	0.4	0.6
3.3	0.6	1.1	2.6
2	2.6	0.8	11.5
2.1	2	2.4	3.2
3	0.3	4.9	1.5
0.1	2.2	1.5	1.2
0.5	1.2	1.5	0.9
1.1	3.3	0.9	0.2
0.5	2.2	0.3	0.6
0.7	0.2	5.1	1.6
0.3	5.5	1.4	2.8
1.2	0.5	2.3	1.3
1.1	0.3	0.2	0.4
0.9	0.9	0.7	1.4
0.5	2.5	1.4	0.2
1.5	2.6	2.5	1
0.5	2	1.5	28.6
0.1	1	0.4	1.1
0.1	2.6	4.5	0.8
0.4	0.6	2.2	6.3
3.4	2.1	2	1.3
0.1	0.5	1.6	0.4
0.7	7.3	0.6	13.3
3.4	0.7	0.3	0.9
2.3	1.9	1.9	0.6
1.3	0.6	1.1	1.8
0.6	5.9	0.6	16.1
0.3	3.2	1.7	1.8
0.6	1.5	0.8	5.6
0.7	0.7	0.9	1.5
0.2	1.1	2.8	18.1
0.7	5.3	0.5	7.4
3.9	0.9	2.1	3.2
0.3	0.5	0.6	3.9
0.1	0.9	0.4	0.8
0.5	2.8	0.8	6.2
1.3	0.9	0.2	9.8
0.3	0.9	0.6	2.3
0.9	2	0.6	0.6
0.3	3.4	1	0.4
1.3	0.7	2.4	0.4
0.3	1.3	0.7	1.4
0.6	8	0.8	6.8
0.4	5.8	1.4	4.5
9.7	2.4	0.5	0.8
0.8	1.2	1.2	0.5
0.5	2.1	1.1	1.7
0.8	4.2	0.5	0.9
0.4	2.5	0.8	0.6
0.7	2.2	0.8	0.5
0.4	4.4	1.1	0.7
0.8	2	0.8	0.9
1	3.3	3.7	12.7
1.2	10.2	0.4	0.7
0.7	7.5	0.4	6.9
0.4	1.1	3.2	1.9
0.8	1.3	1.2	5.7
0.6	2.6	1.3	0.6
0.5	3.5	1.1	2.4
2.5	2.4	0.3	0.5
5.5	4.2	1	0.5
5.9	35.8	8.7	1.4
1.7	1.1	0.4	5.9
0.6	2.6	0.9	1.6
0.1	1.4	0.4	2.7
0.2	2.6	0.5	4.7
0.4	7.8	1.8	33.6
14.1	6.5	0.3	7.3
4.1	1.7	1.1	0.9
1.9	1.3	0.9	0.4
2.2	6.7	1.3	13.2
1.1	2	1.6	1.5
0.7	6.6	0.4	4.6
1.2	5.5	0.3	0.6
0.1	17.6	0.7	0.6
0.1	1.2	1.6	0.6
0.7	0.1	0.8	3.9
0.3	3	0.9	1.9
1.6	2.6	0.2	1.3
0.5	0.7	3.8	2.2
0.5	1.1	1.3	4.5
0.6	1.7	2.7	2.5
0.4	3.9	0.2	1.4
22.2	37.6	0.5	1.1
1	7.4	2.9	1.3
0.7	10.9	2.4	3.6
0.5	4.1	5.5	1.1
0.5	7.8	1.1	7
1.5	17.1	1.5	2
0.8	33.8	0.4	5.3
0.5	4.3	0.2	0.7
0.1	1.4	0.2	1.3
4.8	0.7	0.5	1.7
0.2	5.7	4.7	2.1
0.2	3.7	0.7	7.7
3.6	8.6	0.5	1.7
0.4	8.8	3.6	14.4
0.9	8.6	0.2	3.6
2.9	2.8	0.5	1.7
1.1	5.9	1.1	2.1
0.1	1.2	1	0.8
0.5	0.7	0.3	2.2
0.4	2.4	0.3	1.9
0.6	3	0.7	3.8
2.2	1	0.4	0.9
0.8	1.5	1.1	0.5
0.1	9.3	2.5	0.7
0.2	18.1	1.6	4
0.1	4.6	1	2.3
1.8	1.8	1.3	2.9
0.9	8.7	0.3	2
0.6	2.1	0.6	0.6
5.4	3.5	0.9	2.8
1.4	6.1	0.7	3.3
0.7	2.5	1.5	0.2
1.8	2.6	0.5	1.5
3	1	1.3	0.9
1	0.7	1.2	1.4
5.9	0.5	0.4	40.7
1.4	2.1	1	0.4
2.6	0.5	0.8	0.4
11.6	6.1	15.5	0.4
1.5	1.4	0.2	1.5
2	0.7	1.7	0.7
7.5	0.5	0.8	0.7
0.7	0.3	1.9	0.8
1	10.4	0.5	0.2
3.5	1.1	34.7	5.4
0.4	3.3	0.4	2.9
4.8	4	0.4	0.8
0.6	1.4	1	2.4
0.8	2.3	0.6	7.9
2	0.6	0.7	2.3
6.6	0.5	0.3	1.6
1.4	0.5	0.1	1.9
1.3	0.1	2.5	0.7
1.2	0.4	0.2	0.6
1.6	0.6	0.3	0.9
2.1	9.5	0.5	21.2
0.6	1.5	2.6	11.2
0.8	5.4	2.2	3.2
1.1	2.3	3.2	1.7
8	5.5	1	13.4
2.3	18.9	0.6	1.6
1.9	9.7	1.1	1.4
0.4	11.9	2.1	0.7
11.2	11.4	0.4	0.9
0.5	0.8	1.3	35.2
2.1	1.5	0.5	3.7
0.6	1.2	0.9	1.5
14.7	1	2	1
6	2.6	0.6	1.6
0.6	1	0.4	0.8
1.6	0.8	0.6	0.6
0.5	16.2	0.6	0.6
0.8	1.5	0.5	6.8
1.2	4.2	0.3	6.7
1.2	1	0.4	7.5
5.4	2.2	0.3	0.7
0.5	9.2	7	0.8
1	2	2.5	5.2
0.5	5	1.1	6.6
0.6	3.5	1.8	2.7
0.6	5.2	2.9	7.2
3.9	2.5	2.1	5.5
2.7	3	1.7	3.7
1	0.7	1.2	1.3
0.6	1.7	0.7	2.7
13.8	40.7	0.9	4.4
2	0.8	0.7	20.2
1.6	0.9	0.6	3.1
1.9	0.9	0.5	0.6
0.9	1.6	0.5	0.7
1	1.2	0.9	12
1.6	2.3	1.8	13.4
0.5	1.7	0.6	4
0.5	3.9	2.3	2.1
6.4	27.5	1	1.8
5.1	1.3	1.9	2
1.8	0.6	2.3	2.9
0.6	2	3.5	1.2
0.9	1.2	1.2	0.8
0.4	19.5	1.4	9.9
0.8	1.5	2.2	8
1	3.1	0.8	5.1
0.8	0.8	0.5	52.6
1.3	0.6	2.1	0.4
1.8	13.9	1.4	1.1
16.9	0.8	0.9	3.2
0.9	0.3	0.4	2.4
2.4	0.6	1.4	0.1
0.3	0.4	36.8	0.8
1.3	3.5	1.7	3.3
1.6	5.3	1.3	1
1	1.6	1	3.2
3.7	2.9	1.5	4.7
0.3	2.2	0.7	2.7
0.6	1.5	0.8	1.1
4.6	4.9	6	2.8
1.5	0.7	1.1	3.3
2.5	3.4	0.5	2.8
1.9	1.6	0.6	1.9
1.7	15.9	1.3	7.7
2.1	2	0.5	5.5
1.4	1	0.7	4.2
1.5	5	0.7	0.9
0.4	14.7	0.4	9
0.6	0.7	0.3	1.2
12	0.7	1.2	5.4
2.3	11.5	1	3.4
1.6	9.6	0.3	1.6
1.3	2.2	7.6	0.4
4.3	8.1	1	0.4
1.8	4.2	0.8	0.8
1.4	5.7	8.7	1.5
2.3	0.7	1.9	1
1.7	2.7	11.7	3.3
0.9	0.7	0.2	1.3
6.8	2	5.3	3.5
2.5	5.5	1.6	0.9
0.6	0.4	2.5	0.3
0.4	0.5	4.9	4.5
2.8	10	1.9	2.3
1	13.5	0.5	2.3
1.6	1.5	2	0.4
0.5	1	0.5	0.8
4.4	3.9	2.1	0.5
0.2	0.5	0.6	7.8
1.9	6.3	0.8	15
1.7	7.6	1	1.4
0.8	0.4	2.1	5.2
1	1.1	12.9	1.1
0.7	0.7	1.4	1.3
0.6	6.2	2.2	3.9
1.6	0.3	0.8	2
1.9	15.7	0.4	0.6
0.4	0.6	0.4	3
2.5	2.2	1.2	2.4
0.7	0.4	1.7	5.8
0.5	3.9	1.2	2.1
1	0.8	1.1	1.8
1.5	0.3	1.5	1.3
1.1	0.5	0.7	0.9
0.4	1	1	1.4
1	1.6	0.8	1.1
0.5	4.1	0.9	8.4
4.9	2.2	11.4	0.8
0.6	0.4	0.6	0.8
3.2	6.7	0.2	2.5
2	3.4	5.2	2.3
6.2	0.6	1	0.8
0.8	8.3	1.1	0.5
0.3	0.5	2.6	8.4
1	3.7	1.5	9.5
1.3	0.8	2.5	4.5
2.7	3	1.2	6.2
0.5	1.4	0.9	3.7
1.1	4.3	1.8	11
1	5.7	1.2	8.5
1.4	11	0.6	1.3
3.8	2.7	1.4	2.6
0.4	2.2	0.8	1
1	2.8	1.5	0.6
2.5	1.1	1.4	3.5
1.4	0.6	0.2	2.5
5	3.6	0.6	0.6
0.7	0.4	0.8	3.3
0.4	0.6	2.7	2.1
1.1	2.5	1.1	1
5	4.5	2.2	4.9
1.5	16.2	2.1	6.6
1.5	2.4	2.4	5.7
0.5	11.2	0.3	5.2
0.5	8.5	2.1	2.6
0.9	11	0.7	0.8
0.7	0.7	0.7	3
0.7	4.5	0.7	0.6
1.6	1.9	0.4	4.1
0.7	4.1	1	1.3
1	0.9	0.6	1.7
6	2.2	7.8	4.3
1.3	1.2	4.4	3.2
0.9	2	5.6	4.3
1.6	2.7	12.7	1
0.7	1.5	3.4	13.6
2.1	3	2.6	14.2
0.9	0.9	2.6	21.5
0.8	1.7	0.4	0.6
1	0.5	4	4.6
0.7	2	1	9.6
0.3	3.7	1.3	5
8	5	0.8	0.9
1.2	4.4	0.5	31.8
0.7	4.5	0.5	2.8
3.9	10.2	0.9	1.1
3.7	1.8	2.2	0.5
1.7	1.8	3.2	1.5
9	2.7	0.9	17.4
18.2	11.8	0.7	4.6
1.1	23.6	0.8	12.4
1.6	5.8	1	2.2
16	9.5	1.8	0.4
0.6	2.4	1.2	1.7
0.9	3.2	0.8	16.7
1.5	0.7	0.9	4.6
2.8	3.1	0.3	4.1
0.9	0.5	1.5	2.9
0.4	9.3	0.5	9.3
0.9	3.8	0.6	10.2
0.5	0.6	2.2	14.9
0.7	0.5	0.5	6
1.1	13.1	3.3	7.8
1.5	11.8	0.7	5.3
0.9	0.3	0.5	1.3
0.8	0.3	5.7	4.1
0.6	0.5	2.1	4.2
0.5	0.9	0.9	72.5
0.6	0.9	1.6	6.7
0.1	1.1	15.5	5.5
0.3	2.7	1.9	2.1
0.3	8.5	34.5	0.9
0.2	0.7	1	4.2
25.4	5.5	0.9	0.8
1.7	12.6	1.2	0.6
1.6	13.1	2	11.4
5.8	7.7	0.9	2.4
4.3	7.7	0.3	1.5
4.5	1.1	2.1	2.1
0.6	3.3	1.5	5.9
0.8	2.2	0.5	1.4
0.5	0.5	0.2	0.6
0.7	1.3	1.6	1.5
4.5	1.4	11.4	0.9
0.8	7	1.7	9.2
1.7	3.8		3.1
0.3	3.2		9.3
0.9	0.8		9.6
8.9	2.3		21
2.1	6.3		10.4
0.1	1.4		0.8
4.1	0.8		1
0.3	3.4		11.3
3	3.8		1.1
0.5	2		0.5
0.5	11.2		21.3
2.2	18.2		19.1
2.4	6.1		6.3
4.4	2.4		7.2
3	2.8		2.2
2.1	4.1		3.9
0.8	7.9		5.8
4.4	2.9		1.7
0.7	1.7		32.5
6.3	12.2		1.7
1.5	12		1.6
9.5	3.4		7.4
1.6	3.3		1.9
2.2	3.2		3.1
1.4	2		0.9
0.2	1.5		18.6
22.2	2.4		13.8
0.7	4.9		2.1
3.8	0.3		6.9
1	5.5		3
1.8	17		10.3
1.1	1.9		1.2
0.7	2.9		0.8
0.6	0.5		0.9
1.2	0.6		0.7
0.7	1.2		12
2.1	2.3		1
6	0.4		8
2.8	3.5		1.3
0.8	2.3		15.8
0.4	2.4		0.6
2	2.3		1.5
1.7	1.3		2.9
1.4	8.8		9.4
0.7	22.5		1.9
0.5	2.5		0.7
9.6	0.9		0.7
1.3	1.3		2.5
2	11.4		8.3
1.5	1.3		8.3
0.8	2.1		2
0.9	3.2		11.1
0.1	2.6		1.6
0.2	3.4		1.2
1.3	1.6		12
14.2	0.7		0.9
2.1	1.1		2.1
2.9	1.6		27.1
1	2.7		22.8
0.6	2.2		3.7
0.7	25.3		1.2
1	4.7		0.5
1.1	0.6		5.3
7.4	2.5		0.7
0.9	0.8		0.3
4	4.7		14.2
2.3	1.2		1.1
1	0.7		0.9
2.3	0.8		0.5
0.7	7.8		28.2
0.8	21.7		0.9
0.5	2.7		2
1.7	3.2		0.6
0.3	0.4		5.1
1.1	5.4		6.9
0.2	0.6		2.2
2.1	0.8		1.1
14.4	5.2		0.5
2.5	1.1		3.4
1.2	0.7		2.5
0.6	0.6		0.6
1.6	2.9		17.8
5.4	3.7		1
14.7	1.8		0.3
5.6	4.7		0.7
0.5	11.9		8
3.6	2.9		3.5
2.3	6.1		2.5
1	0.2		2
1.3	0.7		1.8
1.1	2.1		1.9
1.8	1.3		1.1
0.9	41.4		0.8
0.4	11		0.3
0.4	8.3		1.1
1.9	2		2.9
1	0.9		2.4
0.3	1.1		0.9
0.2	1.3		17.2
0.2	1.9		11
1.8	3.6		2.6
1.3	4.9		0.4
2.5	0.8		0.7
1.4	0.7		2.6
0.6	1.9		1
1.3	0.6		7.6
0.6	1.8		15.8
6.8	3.7		2.5
0.9	1.7		1.2
1	1.5		1.3
0.9	0.7		2.6
1	0.7		1.4
0.4	1		2.4
0.4	0.9		1.4
0.7	2.3		0.6
0.6	0.5		1.1
1.6	0.4		5.5
1.1	0.4		0.5
1.7	18.3		0.5
0.7	2.8		2.6
3.3	1.3		7.2
1	0.9		2.2
1.1	1.5		3.7
1	3.7		1.7
4.3	9		2
2.9	25.3		0.7
8.2	8.5		7.5
1.4	1.3		1.4
1.7	3.3		1.8
5.6	7.2		2.6
1.3	1.9		0.5
1.2	0.5		13.5
1.3	1.6		1.1
19.1	1.4		2.8
1.4	1.4		2.7
1.6	7.7		0.4
0.7	4.9		14.5
0.2	10.9		5.4
2.5	1.3		1.9
1.3	5.4		2.7
1.9	2.8		2
0.9	1.7		0.6
1.5	0.6		0.5
1.5	1.9		0.6
0.5	2.3		1.3
0.7	2.2		1.8
1.1	1.7		0.8
1.2	1.6		6.3
1.3	8.4		1.1
2.5	0.9		3.4
1.1	1		1.4
0.9	1.7		1
1.8	2.2		3.5
0.7	1.4		4.4
1.2	6.2		1.9
0.7	0.6		3.1
9.7	1.4		1.1
0.7	3.7		1
2.3	0.8		4.5
0.7	0.5		6.7
0.8	0.5		65
0.5	0.9		3.6
1.3	0.7		1.8
0.5	0.7		5.8
0.4	3.6		2.2
0.1	3		5.3
0.4	2.9		1
0.4	0.4		20.9
0.5	1.1		1
0.7	1.8		1.7
3.4	9.6		1.8
0.6	0.8		0.6
1.3	1.7		1.6
5.9	1.8		1.4
56.2	17.8		2.7
3.1	0.9		2.1
3.1	0.3		3.4
1.2	5		3.7
1.6	0.4		21.8
1	1.3		11.4
0.7	1.3		8.8
1.1	3.3		6.2
0.9	6		2
1	7.3		7.5
4.8	6.2		65.3
1.6	2.5		2.8
2.5	0.6		1.4
2.4	8		4.6
1	2.8		14.9
1.2	5.3		16
1.1	5.2		1.8
0.6	7.2		1.6
5.8	4.8		6.9
4	1.2		0.8
1.5	0.8		1.7
0.3	0.9		5.3
1.8	4.2		3
0.6	1.3		0.5
1.6	2		1.1
0.6	2.1		0.5
0.5	8.1		5.2
0.7	12.6		5
0.8	4.8		10.6
0.9	2.3		0.5
0.9	2.8		11.8
3.2	3.7		1.3
0.8	3.6		5.1
1.4	4.7		1
9.3	1.9		13.3
3.6	2.9		2.4
1.7	1.1		1.7
0.7	1.7		1.8
29.2	0.8		7.4
1	0.8		0.4
0.2	7		2.9
0.8	8.6		2.2
9.4	4.5		1.2
9.6	0.9		2.6
3.6	1.5		20.6
1.3	2.7		1.1
0.8	2		4.3
20.2	1.2		4.1
0.9	1.6		1.5
2.4	3		11.3
0.8	1.7		27.2
3.2	5.2		5
1.9	8.2		2.9
2	1.1		1.2
1	1.5		2.2
10.9	0.7		0.5
2.3	1.2		18.4
1.1	1.9		0.8
1.9	6.1		1.4
1	6.5		17.8
0.8	1.5		16.6
0.7	6.8		2.1
0.7	1.8		0.4
1.6	3.5		0.9
0.5	2.5		0.3
3.7	1		9.8
0.5	0.8		0.6
5.8	0.3		9
1	0.7		1.4
0.3	9.8		0.4
0.4	1.5		1.4
1	31.3		0.9
1.2	4.3		23.7
0.4	2.7		9.7
1.6	8.2		1.5
4.1	6.9		17
3.2	1.7		2.5
2.3	1.3		0.5
0.5	23.4		0.7
2.7	4.6		37.3
1.8	9.4		2
0.5	5.3		1.5
2	0.6		1.4
1.6	11.4		2.3
2.4	5.2		86.9
0.8	1.8		3
1.3	0.4		6
7.1	1.1		1.5
2.1	16.7		4.4
6.8	3.2		1.9
1	4.6		4.4
0.9	0.9		0.2
0.6	0.9		3.9
0.5	3		0.5
2.8	2.6		10.9
0.5	2.6		2.4
0.3	1.8		0.6
0.5	13.9		4.8
0.6	0.8		1.7
0.8	27.6		16.5
14.7	11.2		6.7
5.1	1		0.4
2	1.7		3.4
0.6	2.2		3.5
6.8	0.5		0.9
0.8	0.7		1
2.7	1.5		1.7
0.8	1.8		3.5
0.7	1.1		0.6
0.7	22.6		26.7
1.1	1.5		2.2
0.2	0.7		2.6
1.5	1.1		1
1.5	2		1.9
4.8	0.4		1.7
2.8	0.9		0.6
1.8	7.7		3.7
2.5	3		1.3
0.8	8.3		3.5
3.9	1.7		2.6
0.4	1.5		2.3
0.7	0.8		24.5
0.5	1.3		6.4
1.2	5		26.4
0.4	1.4		6.1
1	2.3		5.3
0.8	0.7		5.7
1.8	0.5		3.3
1.6	0.5		3.6
6	0.5		1.5
1.1	0.5		1.4
1	0.5		0.8
2.4	0.5		1.3
2.7	0.4		0.5
12.9	8		0.6
1	4.6		0.7
10.3	2.4		6.4
2.2	2.2		16.9
1.2	4.3		0.9
1.3	1.8		1
14.6	0.9		1
2.5	1.3		0.5
0.6	1.5		0.1
0.3	6.4		1.5
3.2	3.9		1.4
2.6	2.4		5.6
0.6	6.9		2.3
0.4	10.6		14.7
2.2	1.4		9.3
6.8	2.3		2.6
4.4	12		9.1
1.7	16.2		45.1
3.7	1.3		16.3
5.4	3.4		4.8
0.8	5.3		6.8
0.8	1.2		0.9
0.8	0.4		8.8
18.8	0.8		11
27.9	3.2		4.2
0.8	0.7		1.2
0.3	0.8		24.9
0.7	4.2		4.8
0.7	8.7		2.2
0.7	0.5		0.8
1.6	4.3		4.4
1.7	0.7		0.7
0.7	4.2		1
5.6	2.1		3.3
4.6	9.4		2.7
1.5	2.1		18.5
0.8	1.2		1.7
0.8	18		1.1
1.8	16.8		4.3
5	5.1		1.7
6.7	14		1.5
1.3	27.1		27.9
0.7	2.4		0.9
0.9	43.3		13
2.4	9.4		0.5
0.9	2.7		1.5
2	10.5		2
2.2	2.4		2
2	3.3		5.9
18.1	0.9		10.5
1.6	0.4		2.6
2.4	1.4		0.7
1.2	2		13.7
1.2	1.6		1.4
1.4	1.8		5.4
13.3	14.8		0.4
19.8	1.1		3.8
52.1	1.2		32.6
0.5	6.6		0.9
0.2	4.4		0.8
0.4	1.6		4.4
2.1	20.1		6
0.7	16		7.6
0.8	10		3
1.4	24.2		2.3
0.9	1.9		2.1
2.3	15.3		3.3
2.1	10.7		3.7
4.9	7		7.2
0.5	7.1		11.2
0.5	4.8		1.3
0.4	8.6		2.1
2.9	8.8		3.8
0.9	13.3		9.5
4.1	0.8		1.4
0.9	2		10.2
0.7	3.8		1.3
2	4.6		5.3
1	8.3		4.3
1.9	1.7		6.2
0.6	0.9		3.4
0.5	2.7		1.8
0.4	0.9		5
0.2	1.8		2.3
3.7	0.8		1.2
1.9	0.6		4
0.8	0.7		0.9
1.5	0.5		0.4
4.8	2.5		0.8
17.8	0.5		10.5
0.8	0.4		3
12.5	0.7		3
0.6	0.6		0.6
0.6	0.5		0.6
0.4	2.5		4.7
0.2	3.2		7.2
4.8	1.8		2.6
1.9	1.2		3.4
0.4	5.8		6.5
0.8	11.4		8.6
0.7	32.6		0.7
1.1	4		5.5
3	3.3		3.4
0.6	2.8		0.6
4	2.3		0.9
1.4	12		13.8
1.2	1		74.1
2.1	8.2		19.2
0.9	1.5		1.9
4.4	0.5		1.1
0.7	1.2		1
0.3	4.6		0.3
0.2	0.3		0.4
0.1	0.5		0.4
0.9	5.3		0.5
0.9	1.1		9.9
11.7	15.9		2.8
1.4	9.2		26.2
0.5	2.2		37.7
1.8	3.2		11.8
0.7	2.7		10.7
1.2	3.8		5.4
0.7	18.9		6.1
0.3	18.6		4.1
4.5	8.3		1.1
0.9	4.4		1.4
1.6	1.7		0.4
0.5	1		0.7
0.1	1		3.6
0.6	1		5.3
1.7	7.3		2.7
1	12.2		2.1
0.4	1		1
3.6	14.7		0.9
0.4	0.8		0.8
1	4.3		3.3
0.5	7.1		6.2
1.6	6.7		15.4
4.4	2.3		0.9
0.8	3.9		4.5
0.4	6.3		4.5
0.7	1.2		2.5
0.5	0.6		4.8
2.4	6.9		1
1	1.1		1.4
1.6	1.8		3.7
0.6	0.7		5.4
2.7	1.2		3.4
6.3	1		1
1.4	5.2		1.7
0.5	16		0.6
1.6	2.5		1.5
0.9	1		7.7
0.6	1		0.6
16.6	1.9		25.1
1.8	1.3		8.8
1.9	0.4		4.8
1.3	0.8		5.5
25.6	0.6		2.8
2.6	0.5		4
1.6	0.4		0.8
10.5	0.6		1
0.5	1.8		5.4
1.2	5.9		1.2
1.1	4.2		3
0.9	1		2.8
2.2	0.4		22.1
0.6	6.1		12.6
0.7	1.1		5.2
0.7	9.2		11.3
0.8	2.5		0.9
12.1	15.2		0.7
1.4	31.7		2.7
1.3	9.4		4.3
0.6	6.2		28.6
0.2	0.6		4.2
0.7	2.6		1.5
0.2	1.8		2.4
0.4	5.2		1.4
0.4	0.9		7.4
0.6	1.2		4.3
4	1		1.6
2.9	16		0.9
0.7	1.4		6.2
9	5.5		10.2
3.3	4.4		6.3
0.6	1.5		14.1
0.5	1.3		7.5
0.9	1.5		2.5
46.7	4.6		5.6
58.5	4.2		39.5
0.7	6.6		8.9
1.1	5.1		0.7
2.8	29.4		0.7
14.3	24.7		1.1
1.2	2		4
1	3.9		5.7
0.5	1.1		1.2
1	9.5		0.8
1	2.2		3.9
1.1	6.1		3.2
1.6	13.2		4.3
1.8	1.3		19.4
1.3	1.5		3.1
0.2	2.8		4.9
13	1.3		4.7
0.3	3.4		1.7
5.6	1.5		6.8
0.6	0.8		1.9
10	0.8		3.8
0.4	3		9.8
0.9	0.7		2.3
0.7	2.3		2
1.6	0.9		4.4
0.4	1.3		13.8
1.4	15.3		3.7
0.3	1.5		6.8
0.5	0.8		17
0.7	1.1		1
0.4	10.9		23.4
0.2	8.9		6.4
0.7	3.5		6.5
0.8	4.8		3
0.8	1.9		2.2
0.6	0.4		2.2
2.2	5.9		1.3
5.3	6.1		1.7
2.9	9.2		5.4
0.7	2.5		53.6
0.2	1.7		2
0.5	0.7		0.6
0.4	2.4		1.6
1.3	0.9		1.4
1	0.6		12.9
0.7	1.3		4.1
5.6	7.4		5.9
2.2	3.2		6.6
9.2	18.3		27
2.2	4		3.4
3	3.6		1.5
8.3	16.4		0.5
3.6	2.7		7.4
0.4	4.1		3.2
3.9	1.3		4.7
2.3	14.2		4.4
0.7	8.1		0.3
0.4	3.6		2.3
1.1	12.8		1
5.3	1.2		0.7
1	0.4		0.6
0.8	0.6		15.7
1.7	1.1		2.3
12.4	0.7		7.4
1.6	0.5		1.8
1.1	1.2		2.2
1.5	13.4		1.6
1.1	17.3		4.4
0.6	2.2		1.3
1.1	14.2		2.4
0.5	4.1		0.5
1.8	2.5		9.2
0.9	21.2		2.2
0.6	10.5		39.8
1.8	1.3		15.5
0.8	1.7		2.9
2.8	1.4		0.8
0.6	1.1		0.4
0.4	8.5		2
4.6	0.7		4
4.2	0.8		3.2
0.8	1		0.7
0.7	0.5		0.6
1.3	5.6		11.8
0.6	54		4
1.9	4		4.9
0.6	2.8		1.2
0.1	6.2		1.1
1.9	2.2		1.6
0.3	11.4		3.2
2.3	33.1		0.7
1.7	1.5		4.2
1.7	1.1		3.2
2.4	15.4		1.2
0.9	2		0.9
5.7	2.5		2.5
9.2	5.7		1.2
2	5		0.8
0.4	10		1.1
5.4	6.8		0.8
0.8	2.6		8.3
0.1	1.4		13.9
2	4.8		1.5
5.7	4.3		2.8
1.2	3.8		3
2.5	1.7		0.8
3.2	21.6		1.1
1.1	1.8		1
1.2	0.1		3.6
1.5	0.9		0.3
0.4	7.4		1.1
0.9	1.8		0.4
0.1	2.7		0.2
3.9	0.9		3.1
1.4	1.5		8.4
4.9	5.7		2.2
1.9	4.1		7.8
2.2	9.4		1.2
2.1	44.5		0.9
1.3	28.6		1.4
1.7	2.5		1.9
1.2	12.2		4.1
0.3	2.8		4.6
1.6	1		5.2
23.3	0.8		3.6
1.9	0.8		13.4
2	2.7		1.5
0.2	16.7		3.6
0.3	11		2.2
4.8	5.5		56.6
0.8	1.7		2.3
4.8	0.6		3.5
0.7	8.3		3.7
1.2	2.9		1
3.3	0.3		0.9
2.3	4.8		18.2
0.4	20.1		4.4
0.2	1.5		2.5
0.5	8.1		0.2
0.3	0.5		8.7
0.9	3.5		14.4
0.5	9.4		0.9
8.8	76.6		7.1
3.6	6.3		1.2
1	4.4		0.4
2.2	5		1
3.8	1.4		9.4
1.5	2.6		5
1.9	1.1		2.1
9.3	32.9		7
4.8	7.5		2.1
10.6	7.6		27.3
1.2	1.5		3.9
2.3	0.9		5.2
6.7	0.4		1.3
1.6	7		0.7
2.3	1.4		0.9
4.1	2.3		0.7
0.9	1		1.8
2.4	10.6		0.2
8.7	38.3		1.3
1.6	0.9		4.1
2	36.8		4.9
4.3	1.5		3.3
0.7	4.1		5.3
0.5	3.3		2.8
0.7	0.5		0.6
2.5	30		1
1.8	12.5		3.5
3.7	26		13.3
2.3	4.1		41.7
12	2.2		2.2
2.4	0.9		0.6
6.3	0.5		8.4
1.7	20.8		22.4
3.4	12.2		1.9
0.4	1.1		1
8.7	2.1		6.9
2.4	5		2.6
1.1	5.2		16.6
0.6	1.3		0.3
1.7	31.4		19.7
1.4	7		2.7
1.3	24.9		2.4
0.3	0.3		2.7
1.5	1.6		3.7
0.4	1.3		3
0.4	0.4		0.4
0.5	0.3		0.2
1.3	1		1.6
1.5	20.2		3.6
0.9	8.4		9.4
1	1.3		1.6
0.9	5.1		1.1
0.5	7.3		6.2
2.4	2.4		1.2
3.1	0.8		17.9
0.8	3		3.1
1.4	3.6		3.1
0.2	3.1		2.4
6	3.4		2.7
0.7	24		6.2
0.4	7.1		0.6
5	6		1.3
1.1	5.9		1.2
1	23.5		14.6
1.2	9.4		6.5
1.9	7.2		0.8
0.4	11.1		8.6
0.3	6.9		4.2
0.3	2.3		1.7
16.1	3		3.4
0.5	7.6		7.8
0.6	25.4		0.9
0.3	2		0.8
6.7	5.8		12
1.1	7.9		1.9
0.8	9.3		1.8
0.4	1.9		2.2
5.4	0.9		0.5
1.9	0.9		5.7
3	0.9		0.5
0.6	7.3		5.1
1.1	0.8		3.4
4.3	0.5		3
5.5	4.2		1.4
1.5	0.7		5.6
11.1	0.7		2.9
2.5	13.3		0.1
1.8	5.7		3.6
4.6	9.1		1
2.2	7.6		1
0.5	10.3		0.6
14	11.4		1.4
1.4	15.2		0.7
0.1	2.6		1.8
1.7	18.1		1.9
1.7	6.5		0.3
1.2	0.5		0.5
1.9	1.5		0.4
5.7	0.7		1.3
0.4	0.8		1.1
1	9.3		1
	13.5		0.5
	4.9		1.1
	2.1		1
	2.8		34.1
	1.2		1
	28.6		4.5
	0.8		0.4
	1.7		33.9
	3.1		0.8
	2		0.9
	14.1		0.4
	2.1		0.4
	1.1		1.2
	2		6.6
	17.9		6.1
	13.5		2.3
	23.2		0.7
	1.9		7.4
	9.3		2.6
	12.2		3.3
	1.9		6.6
	1.4		4
	1.9		0.8
	0.8		1.1
	2.9		1.8
	0.8		2.5
	1.4		13.9
	1.4		5.1
	4.3		7.8
	4.3		0.7
	4.9		0.8
	2		7.4
	0.7		6.2
	16.7		2.8
	3.4		25.6
	0.5		2.8
	20.8		0.3
	0.6		4.3
	1		5.7
	0.5		3.2
	0.6		2.4
	0.7		2.4
	0.6		2.9
	5		9
	0.6		16.4
	1.2		2.1
	1.9		2.2
	0.7		0.8
	1.3		0.8
	0.4		12.5
	8.1		15.3
	0.6		2.8
	5.1		4.4
	2.3		9.1
	5.2		1.9
	11.2		2.8
	0.4		0.4
	2.7		1.7
	4.4		5.9
	0.6		2.4
	0.8		1.2
	0.5		18.5
	11.3		0.9
	0.5		1.9
	4.9		0.6
	2.3		0.4
	1.9		8.2
	2.2		2.3
	4.4		1.5
	1		1.5
	0.5		1.5
	0.4		0.6
	63.5		0.4
	0.6		0.1
	0.7		0.4
	0.5		0.4
	2.1		0.5
	1.5		1.4
	4.8		1
	4		1.8
	0.4		7.3
	13.4		9.3
	3.6		4.2
	4.2		6.1
	23.4		1.9
	0.8		0.4
	4.1		4
	0.6		1.3
	8.9		28
	1.1		3.6
	1.3		3.2
	2.5		2.4
	0.9		1
	0.7		0.6
	3.9		1.6
	0.6		7.8
	3		1.4
	7.9		30.2
	1.2		8.3
	0.6		11.6
	3.5		2.7
	0.9		0.8
	0.2		1.6
	40.1		8.1
	0.8		0.6
	9.1		1.9
	4.8		10.8
	3.6		15.6
	0.8		2.7
	3.7		26.8
	1.6		6.2
	5.6		6.1
	10.1		9.7
	0.4		6.3
	5.3		8.7
	0.8		0.9
	2.5		0.2
	1.8		0.3
	1.9		19.2
	0.2		14.2
	0.9		1.4
	0.7		1.2
	2.9		0.7
	28.4		0.3
	4.9		0.4
	0.6		1.6
	1.6		6.7
	2.8		8.8
	1		1.1
	0.4		8.8
	33.3		14.3
	9.4		0.6
	5.1		0.7
	1.8		6.1
	5.5		0.8
	35.6		2.9
	2.2		4.1
	0.6		4.4
	2		19.6
	0.4		2.5
	3.4		28.3
	0.4		2.2
	0.4		0.7
	0.9		6.6
	12.1		3.3
	1.2		1.2
	0.8		2.8
	61.2		0.9
	8.4		4.6
	3.1		0.7
	3.8		2.9
	9.6		9.6
	1.8		2
	5.1		0.8
	1.2		1.3
	25.3		32.9
	6.5		6.5
	0.7		1
	1.3		2.5
	1.8		18.3
	1.1		11.4
	4.2		0.7
	0.6		12.7
	3		10.9
	5.3		4.2
	1.9		17.1
	2		2
	4.6		7.4
	2		2.3
	0.4		0.6
	0.3		1.6
	1.9		5.4
	5.4		0.3
	1.7		0.2
	5.3		3.4
	1.1		6.2
	1.3		24.8
	3.6		7.7
	0.9		11.2
	0.5		9.9
	5.1		6.7
	8.1		0.5
	14.7		0.6
	1.2		2.2
	0.3		17.7
	0.4		0.8
	2.6		1.2
	0.5		2.8
	1		10
	15.8		1.8
	4.2		0.5
	2.8		1.7
	3		3.3
	2.1		3
	1.5		3.2
	31.9		3.1
	9.8		1.9
	26.8		0.7
	0.4		1
	7.8		13.9
	2.3		44.3
	1.8		0.4
	0.9		0.8
	0.5		6.1
	0.4		0.9
	1		0.6
	0.5		3.1
	6		0.5
	1.5		3.8
	20.2		17.3
	0.9		4.1
	0.5		1.8
	1		1.6
	2.3		1.4
	6.3		9.2
	5.9		12.4
	1.6		10.6
	0.3		1.2
	0.7		11.7
	2.5		3.9
	6.4		1.1
	0.7		1.9
	6.2		1.6
	0.8		0.8
	24.4		18.7
	1.4		7
	1.3		0.6
	5.9		0.8
	42.1		0.9
	2.4		22
	1.2		5.8
	0.1		15.7
	1.8		4.3
	1		2.3
	18.3		0.4
	1.9		2.6
	7.6		4.2
	1.9		12.2
	3.6		3
	2.6		1.7
	1.6		4.5
	11		1
	1.3		0.2
	0.7		0.7
	0.9		2.4
	9.4		0.8
	5.8		3.8
	14.4		1.4
	3.6		1.8
	2.6		0.7
	6.6		0.7
	28.5		0.3
	12.4		0.6
	0.7		0.3
	1.1		1.6
	0.8		14
	12.8		3.9
	1.7		6.9
	3.3		2.2
	0.8		5.7
	0.6		1.6
	3.9		0.4
	1.2		1.5
	0.6		3.3
	8.3		0.5
	26		0.8
	1.3		39.7
	2.5		0.4
	1.9		5
	4.9		0.5
	2		6.7
	1.9		4.4
	0.5		4.8
	1.8		4.8
	1		0.3
	3.4		0.5
	5.3		0.3
	0.5		16.1
	6.8		9.6
	1.5		2.3
	1.1		0.5
	0.5		0.5
	1.3		1.2
	0.9		9.9
	1.6		1
	6.5		2.1
	3.3		2.6
	2.4		16.4
	0.3		2.4
	12.5		17.4
	1.8		4.4
	3.4		2.2
	0.9		1.7
	6.4		0.5
	11.5		0.9
	24.9		0.3
	0.4		1.8
	42.1		2.6
	9.3		1.4
	1.5		1.6
	15.6		1.5
	1.5		5.3
	0.7		0.3
	1.5		5.5
	4.7		11.4
	1.7		3.3
	1.3		3.9
	0.8		3.4
	0.6		3.4
	3.7		24.7
	23.4		4.3
	5.1		7.9
	35.9		0.7
	31.2		3.9
	4.3		3.9
	5.1		4.2
	6.4		10.7
	9		2.1
	8.6		6.4
	2.4		0.6
	0.6		6.4
	1.7		15.4
	2.1		4.8
	30.1		5.8
	2.2		1.2
	3.4		14.2
	8.1		7.7
	3.1		0.9
	0.4		4.1
	0.3		2
	10		3.6
	2.3		1.1
	3.9		1
	10.1		2.5
	23.1		2.3
	9.9		1.9
	10.1		10
	3.7		3.4
	24.5		17.6
	6.9		1
	1.1		18.5
	1.2		1.2
	0.6		4.9
	7		4
	1.1		0.8
	5.1		10.1
	6.2		1.1
	3.9		3.6
	2.6		5
	2.1		7.4
	1		0.4
	1.5		4.8
	1.1		23.5
	3.7		2.8
	16.5		9.3
	24.3		0.7
	1.3		0.4
	6.2		0.8
	13.8		1.4
	2.8		1.6
	0.8		1.3
	2.3		1.2
	1.1		1.2
	0.9		40.4
	2.4		1.7
	1.9		2.1
	9		3
	1.9		3.8
	2.2		22
	10.6		0.8
	4.3		1
	11.8		3.7
	4.3		1.3
	3.3		0.4
	1.6		1.5
	20.6		1.1
	1		3.8
	1.9		0.4
	1.1		0.8
	17.9		5.4
	8.4		1.4
	7.2		5.2
	1.2		14.3
	2.2		5.6
	0.5		9.2
	7.2		3.7
	10.8		2.3
	4.9		0.5
	4.2		7.4
	13.6		0.3
	0.4		1.8
	1		0.9
	0.4		19.5
	0.3		4.4
	0.1		3.1
	0.6		1.3
	0.7		13
	0.4		0.6
	1.1		0.3
	69.2		7.3
	4.6		4.2
	3.4		76.9
	3		1.4
	5.1		1.9
	14.2		3
	0.6		1.2
	0.8		0.4
	0.9		0.4
	3.2		1.1
	1.2		2.5
	5.9		1.1
	2		1.3
	0.5		3
	2.1		4.8
	2.6		20
	12		0.5
	3		6
	13.9		40.4
	1		20.2
	0.4		0.5
	0.1		2.2
	13.6		1.9
	2		1.6
	16.8		19.8
	21.8		0.4
	18.2		1
	1.4		2.8
	3.4		2.3
	38.7		0.5
	2.4		0.6
	2.7		22.3
	1		17.8
	9.2		2.3
	1.9		36.4
	2.2		0.9
	0.5		1.2
	2.4		3.3
	0.5		0.3
	0.6		0.4
	6.4		1
	0.4
	19
	1.7
	4
	2.9
	0.7
	1.4
	3
	7
	0.6
	0.7
	0.8
	4
	2.6
	1.7
	1.3
	12.4
	35.2
	5.2
	19.6
	7.9
	3.1
	4.2
	5.7
	0.2
	0.4
	0.2
	0.5
	9.2
	5.5
	0.5
	0.6
	0.6
	0.5
	2.3
	0.8
	0.1
	3.4
	0.5
	0.2
	3.7
	5
	4.4
	4
	3
	3.9
	9.7
	19.2
	6.4
	0.9
	1.5
	1.2
	0.9
	0.4
	4.1
	1.9
	0.8
	0.5
	13.8
	52.2
	9.7
	6.5
	1.3
	21.7
	7.2
	1.6
	0.6
	14.1
	18.9
	9
	0.8
	0.6
	7.2
	2.4
	10.8
	1.4
	0.1
	3.6
	7.9
	5.3
	1.9
	1.6
	4.2
	7.5
	1.4
	0.3
	0.6
	8.5
	8
	1.5
	25.8
	2.9
	0.8
	0.7
	2.4
	1.6
	2.9
	2.2
	19.3
	11.2
	6.7
	4.4
	1.5
	10.4
	2.4
	0.6
	0.6
	0.6
	1.1
	0.6
	2.3
	2.2
	1.7
	0.6
	0.9
	1.4
	5.4
	12.3
	4
	3.7
	6.7
	0.3
	21
	0.8
	4.4
	1.3
	4.9
	0.7
	1.7
	6.3
	2.9
	4
	2.4
	20.5
	3.8
	5.3
	9.4
	2.3
	1.4
	28.3
	0.8
	0.8
	0.3
	0.3
	7.9
	0.7
	1.3
	0.8
	16.6
	7.3
	1.2
	1.3
	1
	4
	1.5
	3.3
	0.6
	0.4
	0.5
	0.4
	14.6
	35.7
	22.2
	0.8
	0.6
	6.6
	4.6
	94.2
	5.2
	15.2
	4
	5
	42.7
	3.7
	13.1
	4.2
	26
	1
	2
	0.6
	1.8
	11.5
	0.1
	0.2
	19.8
	2.4
	1.5
	18.5
	2.2
	0.9
	2.7
	23.2
	8.9
	7.8
	6.8
	0.4
	0.6
	19.4
	53.3
	1.1
	5.3
	1.1
	5.4
	0.7
	0.5
	7.5
	16.8
	22.3
	6.9
	0.3
	2.8
	0.8
	11.4
	1.8
	1.4
	5.8
	7
	1.5
	1
	3.9
	6.2
	1.7
	2.2
	1
	0.2
	0.4
	1.2
	3.7
	2.2
	0.6
	13
	2.1
	1.1
	1.4
	1.1
	0.3
	0.5
	1.5
	4.5
	1.8
	0.9
	0.9
	1.1
	6.8
	2.4
	0.8
	0.7
	1.2
	5
	2.1
	1.8
	8.2
	1.8
	4.6
	4.4
	9.8
	4.4
	1.7
	1.5
	2.5
	1.7
	2.7
	2.9
	1.9
	2.4
	4.3
	4.3
	1.4
	0.3
	5.2
	3.7
	2.1
	12.3
	12.7
	9.7
	3.3
	7.1
	0.5
	6.1
	57.1
	4.9
	31.7
	4.4
	1.9
	12.8
	1.1
	0.9
	0.3
	4.6
	8.1
	4.9
	0.6
	4.4
	4.5
	35
	2.3
	23
	2
	1.1
	54.2
	0.9
	1.4
	0.4
	1.7
	1
	16.4
	0.9
	0.2
	2.4
	1.2
	1.1
	2
	1.3
	1.2
	7.4
	1.5
	0.9
	1.4
	28.4
	9
	10
	1.2
	4.9
	3.2
	12.5
	3.2
	1.6
	1
	0.5
	1.4
	0.7
	0.7
	0.6
[truncated: 53 more rows]

## Sheet: Figure 2B
Table of residence times (sec) for Figure 2B
wt Ndc80 + Dam1 A phos	wt Ndc80 + Dam1 B phos	wt Ndc80 + Dam1 C phos	wt Ndc80 + Dam1 BC phos	wt Ndc80 + Dam1 AB phos	wt Ndc80 + Dam1 AC phos
4.2	5	11.8	1.5	8.3	0.8
7.9	4.5	3.7	4.1	10.3	1.8
17.8	3.2	3.3	0.5	1.1	0.8
2.8	1.6	1.9	1.6	1.2	1.4
8.9	0.5	3.1	3.6	0.2	1.6
1	0.8	0.7	2.1	2.4	0.9
0.9	8	2.7	0.4	4.8	1.1
0.4	8	0.6	11.7	10.4	0.5
0.9	1.8	1.6	8	1	0.5
1.1	1.4	2.2	1.7	2.6	1.4
3.8	5.1	1.8	6.2	1	0.2
2.7	5.8	4.6	3.5	0.7	0.9
1	11	1.6	0.6	1.9	0.8
1	7.8	8	0.5	1	0.3
1.9	2.8	5	5.7	3.1	0.7
1.1	2.5	30.7	1.7	1.8	0.8
1.2	2.1	0.7	0.9	0.8	1.1
0.5	19.8	3.4	4.3	7.7	1.9
0.6	21.8	4.2	20.5	0.2	15.7
25.2	0.5	0.4	1.6	2	0.2
6.3	1.2	0.9	0.7	1	0.7
6.5	1.2	4.4	0.6	4.2	3.5
6.6	67.1	3.1	1.4	1.2	0.7
1.5	5.5	3.6	1.9	1.6	1.8
2.1	1.6	0.1	13.7	1	50.3
0.5	0.5	66.9	5.4	6.1	2
2.9	0.6	20.7	5.5	0.9	1.1
3.4	2.8	6.1	4	1.7	0.3
5.7	14.3	1.9	0.7	3.3	2.3
1.1	1.6	9	0.4	1.7	0.6
3.1	1.4	6.8	1.6	1.2	0.1
30.5	0.8	2.8	0.2	0.7	0.4
3.7	3.3	0.7	4.9	0.3	1.9
10.8	1.9	1	1.7	1.1	1.7
2.4	4.5	0.6	0.8	0.7	4.4
1.1	2.9	0.5	3.5	3	1.2
0.6	8.2	0.9	0.6	0.9	12.3
0.4	0.3	1	0.6	0.9	1.2
2.3	2	0.4	1.2	0.6	7.3
1.5	4	0.3	9.2	0.3	1.2
2.4	1.4	0.9	4.6	0.6	0.6
1	1.5	0.9	2.5	2	0.9
2	0.8	19	0.6	0.6	6.1
1.3	1	1	18.7	0.1	0.8
1	1.2	0.7	2.1	0.8	2.4
0.9	0.8	2.9	1.4	3.2	7.3
1.2	0.5	3.7	6.3	4.3	0.9
0.8	0.9	2.1	4.2	3.6	0.4
0.6	0.3	1.1	0.6	4.7	0.5
4.5	0.2	4.3	0.6	2.7	0.7
0.7	3.5	11.6	0.4	0.3	0.1
2.3	3.4	7.4	0.9	2.4	3.4
1.2	5.1	3.9	1.5	1.5	0.4
0.3	1.2	7.5	0.4	2	1.3
0.6	1.1	5.1	2.8	2.3	0.7
1.5	0.3	5.4	1.9	1.7	0.7
14.1	0.2	22.8	2	1.9	1.3
4.8	0.4	1.2	0.8	0.8	0.5
1.7	0.4	1.9	0.5	2.4	1.3
2.9	0.4	13.7	2.1	1.2	0.9
1	1.4	4.3	0.8	1.6	2
0.9	2.8	1	0.7	0.2	0.8
11.3	2.5	57.4	1.2	1	9
1.6	9.8	0.8	0.5	0.7	0.7
0.3	25.7	2.1	9.9	1.7	0.2
0.7	1.4	5.3	1.2	1.3	0.2
0.6	4.9	8	1	0.6	0.2
2.1	2.3	1.7	0.3	1.1	1.3
1	14.5	0.9	1.9	1.4	0.2
1.2	3.2	0.8	2.4	2.8	0.1
9.4	3	0.5	0.8	1.2	0.2
1.2	14.8	0.3	0.4	0.4	0.1
0.2	2.1	2.8	0.6	0.6	4.4
1.2	3.4	1.2	0.8	0.4	0.2
2.2	16.5	0.4	0.4	0.9	1.7
1.2	10.9	7.4	0.3	0.4	0.9
0.9	1.6	3.6	0.7	0.5	1.3
6.3	0.7	1	2.1	1.3	12.2
4.5	1.7	2.4	1.5	0.7	34.5
4	0.7	1	0.3	0.6	14.3
0.7	1.8	0.8	0.8	0.4	21.2
1	1.7	1	1	0.9	28.7
1	15.7	1.7	95.7	0.8	0.2
1.8	3.1	3.4	0.5	0.8	0.7
1.1	2.2	1.5	0.2	1.5	0.3
3.2	8.3	1	1.3	1.9	8.5
5.6	1	0.4	1.1	3	88.5
3.4	1.1	0.8	0.7	3.6	2.2
21.7	3.2	0.1	0.9	1.2	0.6
2.2	2.2	1	10.3	2.3	0.4
3.4	37	3.2	2.6	1.4	0.4
3.8	2.4	6.4	0.8	1.7	17.8
2.9	18.9	1.4	3.1	23.4	1.4
3.9	1.1	2	0.7	2.7	0.4
1.1	1.2	1.2	4.2	0.5	1.2
1.3	6.1	4.4	1.4	0.5	5.9
3.8	20.5	4.8	0.3	0.8	0.4
2.2	17.8	1.5	0.8	0.5	36.4
2.4	17.2	1.1	0.5	1	71.6
2.1	14.6	2.4	0.8	0.7	0.4
0.7	6.5	1.6	6.4	0.9	0.1
3.3	7	1.3	1.1	1.4	0.2
2.1	10.2	0.7	3.6	0.9	0.6
0.7	2.6	0.3	0.7	1.2	0.7
0.9	1	1.9	3.1	1.2	0.8
9.7	1.7	1.2	3.8	1.5	1.7
13.9	18.4	0.5	0.6	0.5	0.8
3	6.7	1.3	3.8	0.5	0.8
3.2	8.6	2.8	1.3	0.7	0.5
0.8	1.7	0.3	3	2	0.9
1.4	5.6	0.5	0.5	0.6	7.7
0.7	17.8	0.8	0.6	0.5	3.6
4.1	1.7	2	0.8	0.8	2.1
2.7	2.6	0.6	1.4	2.9	0.7
2.7	2.1	0.9	0.6	2.1	0.6
1.5	2	3	1.7	0.1	1.4
0.8	4.1	0.9	3.7	0.5	28.6
1.2	5.4	0.5	1.1	0.9	0.5
1.7	1	1.5	1.3	0.7	0.3
1.8	1.5	2.4	1.6	0.9	0.3
0.6	3.6	1.5	0.7	0.6	0.6
1.4	1.3	1.4	2.4	2.3	0.3
1.6	2.1	0.6	9.1	2.6	1.3
0.6	1.8	0.9	0.5	1.7	1.1
0.8	6.3	6.2	2.1	0.8	3
4.2	0.5	1.7	0.3	0.4	0.4
1.8	3.1	1.2	0.4	0.3	0.2
7.1	2.3	5.1	0.5	0.6	2.9
1	1.4	0.8	0.5	0.4	0.4
0.4	4.4	4	0.6	0.5	0.1
0.5	0.9	0.5	0.8	0.5	0.3
0.9	0.9	0.4	3	0.3	0.7
2.6	5.9	2.3	3.7	0.7	8.3
1.6	3.1	0.3	1.5	0.8	1.5
2.4	0.9	1.1	0.4	0.6	68.3
1.9	0.5	1.7	2.4	0.3	0.1
28.5	6.8	0.9	0.6	0.3	9.1
7.7	2.3	0.6	1.5	0.6	0.5
66.2	2.5	4.8	4.8	1	17.2
9.2	11.6	0.9	1.3	0.5	1
7.8	1.5	0.9	0.7	0.4	4.1
2	1.3	1	0.3	0.7	3.4
3.4	12.1	0.7	0.3	0.3	0.6
0.6	1.6	3.9	0.3	0.5	0.8
0.6	3.6	0.6	2	0.6	0.7
7.9	5.2	1.9	1.1	1	0.3
2.2	2.3	2	1.9	0.4	0.3
3.9	7.1	1.3	0.6	0.9	0.2
1.1	2.7	0.8	3.9	0.7	0.7
10.1	3.3	8.5	2.4	2.9	0.3
1.5	2.3	1.6	1.4	1.1	0.6
0.8	6.2	1.9	0.7	1.2	10.7
7.2	8.4	2	0.3	0.6	1.7
2.7	0.5	1.6	4.3	0.6	2.4
2.7	1.3	1.3	1.1	1.3	0.5
12.6	5.9	2.6	0.7	11.3	0.5
1.1	0.7	0.9	2	0.6	2.2
3.4	5.6	0.9	1.4	3.8	0.2
1.1	7	0.5	0.7	1.5	0.2
2.4	13.3	0.2	0.9	2.7	26.6
3.4	6	0.5	13.6	4.3	0.3
2.8	9	4.6	2.6	1.5	0.3
2.7	8.2	2.4	2.2	2.2	27.2
1.3	10.3	1.2	0.6	0.7	2
1.9	4.2	1.5	2.8	0.8	0.5
1.8	5.9	0.7	0.4	0.8	0.4
1.4	1.3	1.7	0.2	1.6	0.2
2	2.1	11.1	3.5	1.2	1.9
1.5	3.1	0.5	0.6	0.6	0.3
1.9	2.8	0.5	14.4	0.9	1.2
1.1	6.3	4.6	1.2	9.3	0.2
0.6	1.9	1.5	0.5	2.9	0.4
1.7	10.2	0.9	0.4	4.7	9.1
0.4	21.1	4.7	1.2	0.9	0.3
7.5	1.3	4.2	0.6	2.2	1.2
2.7	15.1	1.5	3.1	1.2	1.1
4	0.9	1.3	0.1	1	3.3
1.8	7.5	2.2	0.3	1.4	3.8
3	1.9	1.3	5.9	0.6	0.4
1.3	7.7	2.5	8.6	2.3	2.2
0.8	7.5	6.8	2.9	2.9	0.6
0.3	4.2	3.7	1	1	0.3
0.6	0.5	1.1	1.3	6.7	0.1
3.5	0.5	2.6	0.6	7.4	11.1
2.5	1	3	3.5	6.2	0.3
2	1.5	4.3	0.7	1.3	0.4
1.2	0.7	1.4	0.7	2.6	0.8
1.7	1.6	2.4	0.4	8.8	14.5
0.9	0.5	2.3	0.3	3.5	4.7
0.6	1.4	3.1	0.4	1.8	0.4
1.2	0.2	1.6	5.2	0.6	0.3
3.7	0.8	0.7	1.9	1.3	0.3
8.7	1	1	1.4	0.8	0.1
5.1	15.9	4.1	1.1	1.6	6.5
4.6	16.3	1.3	0.6	1	1.4
2.2	10.1	0.6	0.3	0.4	0.4
2.1	1.9	0.8	2.4	0.7	0.2
0.3	1.9	0.9	3.4	1.1	2.8
1.7	5.1	0.5	0.6	1.8	0.2
1.5	2.4	11	2.1	30.5	0.2
1.9	14.7	1.5	3.6	2.9	2.2
4.7	6.3	4	4.5	10.9	0.6
7.7	1.2	1.7	10.3	1.7	2.3
0.5	1.5	5.1	1.3	4	0.4
2.7	17.5	7	1.1	3.5	2.6
4.6	2.2	3.5	1.8	18	0.2
1	0.9	1	1.3	5.4	0.3
0.7	0.5	1.1	2.2	1	0.3
1.5	1.2	1.5	0.3	1.1	2.6
2.9	1.2	1	0.8	1.7	0.2
2.2	0.6	0.7	0.8	5.2	3.2
0.5	1	0.4	1	1.8	0.9
0.9	8	0.1	0.4	1.1	0.5
3.5	3.8	0.3	0.8	0.9	0.3
1.2	19.8	1.1	4.3	1	0.5
0.8	1.5	0.8	2.8	8.2	1
0.3	0.9	7.4	0.2	2.5	1
6.8	8.2	2	0.5	0.7	0.3
5.1	1.4	1.7	3.3	4.2	0.7
0.5	2.1	2.5	1.4	1	0.9
1.7	1.6	6.5	0.3	3.3	1.2
3.9	0.9	2.8	6.7	4.2	0.3
0.8	1	1.9	0.8	0.2	1.1
3.6	2.2	1.6	3.1	0.2	0.2
1.3	3.5	1.8	3.5	2.1	0.4
4.5	8	2.6	1.4	1.2	29.2
0.9	21.1	1.4	0.4	3.7	10.4
0.8	5.3	0.8	0.8	2.9	0.3
1.3	1	0.5	6.9	0.7	1.2
2.3	0.7	19.5	87.4	0.8	12.5
1.6	2.3	0.5	6	0.9	0.3
3.4	9.2	0.5	5	0.9	0.3
6.4	21.7	2.7	0.3	2.3	14.7
3.3	16.5	1.8	4.3	3.6	18.1
2.3	1.8	2.2	14.8	80.7	6.8
1.4	2	1.6	1.7	1.6	21.7
1.8	2.3	1.1	1.1	1.3	0.6
6.1	0.4	4.5	0.3	0.7	0.9
4.2	9.3	2.6	1.9	1.2	0.9
0.6	0.7	4.1	0.6	2.6	0.6
4	0.5	1.4	0.4	4.8	0.3
35	0.8	1.4	1.8	1.7	0.2
8.3	7.3	0.8	1.1	2.3	0.3
2.7	1.2	1.8	1	1.3	1.2
4.5	9.2	7.1	1.3	0.6	6.1
37.8	3.8	0.3	0.6	12.5	4.1
9.2	1.3	3.1	0.4	4.4	1.1
7.4	3.1	1.7	0.3	1.3	0.6
7.8	7.9	1	0.2	1.5	0.1
2	0.9	1.4	0.2	4.6	1.9
1.9	1.1	7.7	2	1.7	2.3
1.5	1	4.8	0.6	36	32.3
1.1	7	2.5	1.1	4.2	0.6
2.1	3	1.1	0.8	1.1	0.8
19.9	9.8	1	0.3	0.5	14.7
0.8	2.9	1.3	21.8	1.2	7.1
0.9	29.3	0.9	4.5	0.8	0.4
1.6	2.7	0.4	2	0.7	1.7
3	3.2	2.1	1.2	3.5	0.2
5.8	0.6	24.4	0.8	3	0.2
3.3	0.5	0.1	3	1.4	0.2
6.7	0.9	0.9	0.6	1.8	16.3
37.3	3.7	0.3	29.9	6.6	1
5.7	0.1	0.8	0.4	4.1	1.7
11.5	3.2	0.3	0.3	0.4	0.4
1	23	37.5	1	0.5	52.9
0.6	2.7	0.7	4.9	1.6	1.2
1.2	4.7	0.8	13.5	1.3	0.4
1.5	17.6	0.5	9.8	1.3	1.8
3.6	8.7	0.6	3.9	3.2	0.2
10.7	1.4	1.3	6.7	0.6	52.4
0.6	4.9	2.1	2.2	0.5	0.6
17.2	3.2	2.3	2.9	0.7	0.9
8.4	3.6	0.8	1.3	0.7	0.4
3.3	6.1	0.4	0.9	0.6	0.2
1.7	2.5	0.1	0.8	1.1	1.7
0.7	3.5	0.5	2.3	1.4	0.2
0.4	1.5	0.6	2.1	1	0.1
1	1	3.4	0.7	3.5	3
2	0.9	5.8	0.6	0.6	0.9
1.2	1.5	0.8	4.6	1.1	1
0.7	0.6	9.8	0.6	1.3	0.6
0.8	0.5	0.3	1.6	0.7	0.1
0.8	0.5	0.6	0.5	1	3.9
1.5	0.5	0.7	2	0.2	0.4
1.2	1.8	1.1	0.4	0.8	0.2
1.3	3.1	0.5	4.5	1.3	0.1
1.4	1.1	2.1	3.5	1.1	0.5
0.7	0.7	1	6.2	0.6	0.1
1.2	0.7	0.4	0.4	2.5	4
2.7	1.4	0.6	0.4	0.5	0.3
1.6	0.4	0.9	0.7	0.4	0.2
1.3	15.2	1.6	0.6	0.4	0.3
4.8	1.5	0.6	6.7	0.5	1.2
0.7	5.8	0.9	2.4	0.8	0.5
0.6	1.6	1.2	5.2	0.3	0.3
0.6	0.6	3.8	0.6	0.3	0.7
2.6	3.6	0.6	0.9	1.4	2.7
0.3	0.8	1.9	2.2	0.4	1.1
0.5	4.3	0.5	1.7	0.3	0.7
1.1	8.4	0.5	0.7	1.8	1.1
1	6.5	3.3	7	0.5	0.8
0.4	2.8	1.4	0.7	0.6	0.5
1.9	10.1	3.6	1.4	0.6	13.9
0.9	3.4	1.1	3.4	0.3	0.6
10.8	1.7	0.9	0.8	1.1	0.5
1.3	8.6	0.5	6.1	0.5	0.2
0.9	20.6	1.7	0.7	0.6	0.2
1	5.8	0.6	0.6	0.9	10.5
1.2	1.7	1.6	0.4	0.7	3.1
1.9	1	1.4	0.4	0.7	1.3
3.8	0.4	4.5	2.2	0.7	8.2
2.3	0.6	2.8	0.9	1.7	31.2
0.7	1.1	4.8	2.7	1.1	1.1
0.1	17.9	7.5	2.5	0.6	1.4
0.2	3.7	5.5	1.1	0.3	0.3
0.8	1.3	0.7	7.5	0.6	0.2
0.4	2.2	1.1	0.8	4.8	0.4
0.5	7	5.8	1.3	2.2	0.3
14.3	5	2.7	4.7	1.1	1
1.7	5.2	0.2	3.8	0.7	0.2
0.8	1.2	0.3	1.3	2.1	0.8
9.6	3.4	0.6	0.8	2.4	0.2
2.2	7.5	2.2	0.7	2	78.3
3.1	13.2	1.6	0.7	1.4	37.4
1.5	5.6	5.3	0.5	0.5	0.2
1.6	3.3	31.6	1.1	0.6	0.1
1.7	2.3	0.7	0.2	0.7	0.6
0.9	1.5	1.3	0.7	0.8	0.3
0.7	1.3	10.5	0.2	0.9	0.4
6.8	1	0.5	0.9	1.3	0.4
2.4	0.6	1.8	1.3	0.7	0.5
34	1.1	0.5	1	1	0.2
5.3	4.5	1.9	0.8	0.6	0.2
2.5	1.1	0.7	0.7	0.4	0.3
4	4.5	0.5	0.9	3.5	0.2
4.1	4	1.6	0.3	0.5	0.6
2.8	3.6	0.6	0.5	0.5	0.2
3.2	2.8	0.3	0.6	0.7	0.4
1	0.7	4.9	0.7	0.6	7.8
1.1	0.3	4.8	0.4	1	0.4
2.6	0.5	1.6	2.4	0.3	5
1.5	1.3	0.6	3.5	0.7	0.5
0.6	1.4	0.8	0.5	0.2	0.2
0.4	3	0.3	0.4	0.3	0.1
1.5	2.9	1.8	0.7	0.4	0.1
1.3	0.8	0.8	2.6	0.5	0.5
4.1	1.5	2	0.4	0.5	0.8
0.6	1.6	3.6	0.3	1.3	1.6
0.3	5.4	8.1	0.5	1	0.4
0.1	2.1	3.1	0.3	1.1	0.4
0.2	1.5	3.2	4.7	5.6	0.5
0.3	0.8	5	1	2.2	10.6
0.9	1.4	1.2	2.7	1.1	0.1
0.5	17.1	1.8	21.7	0.9	0.3
0.5	2.1	0.5	1.4	0.4	0.3
0.6	1.3	0.7	1.1	5	33.8
0.8	3.2	1.1	0.5	3.4	0.9
0.8	0.6	0.9	0.7	0.4	0.1
0.4	0.6	5.6	2.3	0.8	0.3
0.3	1.9	0.4	0.2	0.9	0.2
1.1	4.6	4.6	0.7	0.1	0.2
0.4	3.5	0.7	0.3	0.9	0.3
0.3	2.7	0.7	2.9	0.5	0.4
0.2	2.8	7.2	29.1	2.6	0.3
0.6	0.9	2.8	0.2	0.7	0.2
0.7	1.9	1.7	3.2	1.7	0.4
0.8	2.7	0.7	0.8	0.6	0.2
0.4	14.7	1.8	0.4	1.1	0.2
0.9	13.7	1.3	0.5	2.9	0.3
1.1	32.5	1.2	1.3	1.8	0.6
0.7	21.3	1.2	0.4	1.7	0.6
0.3	0.8	0.3	1	1.1	0.3
0.6	0.6	1.1	0.9	0.5	1.4
0.1	15.3	0.8	3.5	0.9	0.3
0.2	19.7	0.4	5.8	0.7	0.2
11.1	1.5	6.4	1.6	0.4	0.1
1.7	2.6	113.4	0.3	0.8	0.9
0.3	1.3	11.4	2	0.8	0.4
1.4	5.9	15	2.1	50.8	0.5
0.6	3.4	3.3	0.9	3.9	0.4
1	2.1	2.8	2.3	2.3	0.5
1.3	1.8	2.9	1.2	1.7	0.3
3.4	5.1	2	0.7	6.5	2.6
0.6	1.7	2	71.3	1.9	4.8
0.6	0.5	0.9	0.8	3.9	3.1
1.7	0.7	1.2	4.1	2.8	1.5
0.5	16.6	2.4	1.4	1.7	0.9
2.1	2	0.9	4.6	0.5	0.8
0.7	6.3	1.9	2.6	1.1	0.3
1.2	1.6	1.3	0.1	3	5.4
2.6	0.4	1.1	0.7	1.9	2.7
6.7	9.1	1.2	2.8	1	1.8
1.9	2.3	0.5	0.6	2.6	1.9
0.3	2.3	0.9	0.7	1.3	3.2
0.7	6.2	0.7	2.5	1.4	0.5
0.5	1.4	0.5	2.4	0.5	2.3
0.7	2	3	1.9	0.5	1.1
1.1	5.9	2.9	5.6	1.7	0.7
23.6	11.9	3.7	7.4	3.1	0.4
1.4	0.6	1.2	9	2.5	2.2
2.2	1.2	1.7	0.6	1.1	1.2
1	1.3	1.2	0.3	1	0.3
1.8	6	1	0.7	2.2	0.3
0.5	13	4.3	2.2	0.6	0.1
0.4	4	0.7	1	1.2	0.5
0.9	5.2	3.3	2.4	0.3	1.2
0.7	6.1	5.7	0.3	0.8	0.4
0.7	5.6	1.9	1.1	1.1	1.7
2.5	3.4	3.9	1	0.4	21
0.9	0.8	2.7	0.1	0.5	11
0.9	0.5	1	3.2	1	6.7
0.4	1.2	1.6	1.5	0.6	0.9
1.5	0.8	0.7	1.7	0.7	2.6
2.3	18	8.8	1.2	0.8	0.3
2.9	2	1.3	0.6	0.9	0.5
6.8	0.3	18	1.8	1.6	0.6
3.7	1.1	1.3	1.9	0.6	0.5
1.4	7.4	14.1	3.2	1.2	0.4
0.6	1.1	1.9	0.9	2.6	0.2
0.4	0.4	1.1	1.1	1.6	6
0.3	0.8	2.8	48.4	12.8	1.2
0.5	0.2	1.6	1.1	2.1	0.5
1	0.7	2.2	0.6	1	0.6
1	2.9	1.9	0.6	0.6	2.4
1.1	0.7	0.4	0.5	1.9	1.2
1.1	3.3	0.5	2	1	1.8
1.3	1.4	5	1.1	2.5	1.1
0.6	0.9	2.1	24.4	2.5	1
0.5	8	2.7	6.1	0.8	0.6
0.7	2.8	1.5	0.5	1	4.2
0.4	0.5	9.2	1.5	0.7	1.2
2.3	0.5	3.9	0.7	1.1	1
1.1	1.2	1.2	2.1	1.1	0.5
0.3	0.6	1.7	2.7	0.2	25.7
0.3	3.3	12.2	0.6	1.3	1.7
0.8	1.8	6.8	1	9	1.9
1.7	1.4	1.6	3.8	3.4	1.1
1	0.7	12	0.2	4.1	3.5
0.7	2	6.5	0.7	1.7	3.4
0.7	8.9	2.5	8.3	0.8	0.9
0.5	11.9	2.3	0.9	1	0.9
0.8	2.3	18.9	3.5	0.6	0.7
0.1	2.6	0.9	1.3	5.8	0.4
0.6	1	0.9	0.4	0.9	0.3
0.7	1.4	4.3	1.1	0.3	1.1
1.8	1.1	6.6	1.2	0.8	2.6
1.2	0.6	1.1	1.9	1	1
0.5	4.8	5.2	3.2	1.7	0.7
0.3	6.4	3.3	2.3	0.5	0.5
2.3	2.1	0.9	3.5	0.4	1.7
26.2	6.8	1.6	2.4	0.3	0.7
3.5	0.4	0.3	0.1	1.3	32.9
5.5	2.1	9.4	1.8	2.7	1.2
1.8	3.3	7.3	1.1	1.5	0.6
4.5	0.8	2	28.1	0.9	0.6
0.6	2.7	2.6	1.2	0.9	0.4
0.4	0.7	17.9	0.7	0.4	0.4
0.5	7.5	1	1.4	0.9	0.8
7.8	1.4	3.3	0.5	2.3	0.3
1.1	1.7	4.7	7.5	1.4	0.7
1.7	1.4	0.9	0.2	1.2	0.2
0.9	0.4	1.1	0.7	1	0.4
0.8	2	10.7	0.7	0.7	83
0.3	5.8	1.9	2.1	0.7	1.4
0.4	1	5.6	0.5	0.6	0.4
1.5	1.5	12	0.3	1.1	1.1
1.2	2.8	3.1	14.8	0.7	0.3
0.5	0.7	0.8	24.3	0.9	0.4
1.5	0.6	1.1	2.7	0.5	0.7
7.8	1	2.6	0.7	0.3	0.6
1.7	0.5	0.2	3.6	0.5	0.3
0.6	5.9	10.2	2.3	0.5	1.9
1.3	2	3.6	0.4	0.5	0.4
1	0.7	1.5	8	0.4	0.5
1.6	2.9	1.1	5.5	0.5	0.5
2.5	3.7	0.3	22.7	0.2	0.5
1.3	0.7	0.3	0.6	0.6	0.6
7.2	4.1	3	0.8	0.9	4.9
30.4	0.5	1.4	1.5	0.4	0.5
2.4	0.2	1.4	1.5	0.4	1.1
1.2	1.9	1.2	0.8	0.7	0.3
0.4	1.1	26.4	0.4	2.3	1.7
2.9	0.6	17.8	0.8	0.4	0.8
1.5	1	6.2	8.8	0.7	0.2
1.3	0.8	2	0.6	3.3	0.6
0.9	0.5	0.8	0.8	2.5	0.7
1.6	0.7	2.9	0.5	8.7	0.7
0.6	1	0.8	10.7	3.8	0.2
4.5	41.4	1.5	1	2.6	1
2	4.4	0.6	3.1	9.2	0.5
2.6	2	0.9	0.7	2.1	0.3
1.9	11.3	1.3	0.9	1.1	0.7
2.5	3.1	9.9	0.4	1.6	0.3
2.2	6.9	9.5	0.8	0.7	0.3
1	2.9	6.4	1.3	1	0.2
2.2	1	0.5	9	1.3	0.2
0.9	0.6	1.7	4.4	2.7	0.1
0.9	3.7	0.8	2.2	2	0.2
0.4	1	0.6	8.5	20.2	0.5
3.2	2.5	0.7	7.1	8.3	0.5
0.5	0.9	3.4	9.5	2.8	0.3
0.4	6.7	1.8	0.8	2	0.2
0.8	3.1	0.7	1.4	1.8	0.4
0.2	11.1	2	11.2	4.3	0.2
2.1	0.9	1.5	0.4	2.2	0.2
0.9	1.3	1.1	4.1	0.7	0.6
3.5	0.3	3	2.8	0.9	0.1
0.4	6.2	0.1	1.1	1.6	0.6
2.4	2.1	2.1	0.4	1.6	0.8
18.8	0.8	0.8	1.1	0.4	0.6
2.6	1.6	0.4	2.5	1	0.2
3.8	5.6	0.7	0.7	0.8	0.3
12.9	1.7	6.3	1.6	0.5	0.3
2.7	3.4	3.8	3.4	21.9	0.2
29.7	0.6	3.1	1.5	3.6	0.7
4.4	0.9	8.7	5.5	1.8	0.5
1.3	1.3	65.4	0.8	2.6	0.2
2.5	0.9	2.7	2	1.3	0.6
9.4	0.8	3	0.3	8.4	0.4
2.8	1.6	2.8	5.2	2.6	2.9
1.3	0.6	5.9	0.6	2.7	0.6
0.9	0.6	2	0.1	3.3	0.5
1.7	1.6	0.7	0.4	2.9	0.2
0.8	18.3	1.2	1.9	0.3	2.1
16.3	1.6	2.4	5.3	0.5	3.5
4.3	1.6	0.8	3.7	1	0.9
3.2	1.4	1.2	5.1	0.5	0.7
0.9	2.1	21.3	4.1	0.2	1
2.4	2.7	1.8	1.3	0.8	0.5
1.4	7.6	1.4	0.8	0.5	1.4
0.9	3.4	0.5	5.5	0.8	1
1.5	3.2	1.2	14.8	1.2	1.1
31	1.5	0.8	0.5	1	0.6
3.8	4.3	1.3	0.2	1.2	1
2	2.6	1.5	1.8	1	1.6
0.3	0.8	3.7	4	1.1	0.6
0.5	3.4	7.8	4.6	6	1.7
0.3	0.7	3.5	2.7	20	1.1
0.2	1.8	3.7	3.4	1.7	0.3
0.9	2.8	2.1	0.3	0.7	0.6
1.6	1.6	1.3	0.7	1.2	0.3
2.1	0.7	2.1	2.4	1	1.2
0.3	0.5	7.1	12.2	1.6	0.9
0.5	0.6	12.5	0.6	1.2	0.1
0.2	2.2	6.2	0.7	1	0.5
2.2	1.2	4.7	0.5	0.8	0.2
0.3	0.2	2.9	0.7	1.6	1
2.3	1.1	2.3	0.5	1.2	1
3	5.6	1.1	1.1	0.7	1
1.7	6.6	1.6	0.4	0.6	0.2
0.9	2.4	1.3	3.4	0.9	0.1
6.4	8.2	2.8	2.8	0.3	1
26.5	2.1	1.9	4.5	1.2	0.5
12.6	2.6	2.2	1.4	0.5	0.5
3.9	2.2	3.3	1.2	0.3	0.5
1.2	11.6	2.4	1.2	0.4	0.6
1.1	1	1.4	1.5	0.8	1.2
0.6	0.4	1.1	1.4	0.1	1.6
1.6	0.9	4.9	3.6	0.3	2.2
1.7	1.4	1.5	3.2	0.4	1
0.9	0.8	3.1	5.2	0.5	0.7
1.4	0.6	2	5.4	0.8	0.4
2.3	0.5	0.5	0.8	2.6	0.1
5.2	0.5	1.2	0.5	1.7	0.5
1.7	0.5	0.6	0.7	1.4	0.3
1.9	2.1	0.7	3.5	0.9	0.3
9.9	2.1	1.1	0.9	2.2	0.2
2.6	0.8	0.3	1.5	0.2	0.4
1.2	1.8	1.9	2.3	0.8	0.4
10.8	0.3	2.2	5.3	2.7	0.9
10.2	1.5	10.2	3.9	4.5	1.2
2.8	0.8	1.5	1.1	2.1	0.2
11.6	2.5	5.7	2.5	0.5	18.9
0.6	1.7	0.9	2.1	0.8	1.4
1	0.7	0.2	5.4	0.5	0.9
0.7	0.9	3.2	2.5	2	0.4
0.6	1.2	2	2.8	0.9	0.6
2.9	0.9	7.3	2	1	0.7
2.7	0.8	1.5	7.2	1.7	0.1
6.1	1.6	6.9	7.7	1.1	0.8
6.9	1.3	3.8	7.5	0.4	2
6.8	0.4	4.1	6.4	1.3	0.4
12.8	0.6	0.2	0.6	0.6	0.3
0.6	0.5	0.9	4.4	1.5	0.4
0.6	9.5	7.7	0.5	0.2	0.1
1.1	5.4	4.4	0.9	1.1	0.2
2.7	0.6	3.2	1.5	0.7	0.5
2.6	6.3	1	0.5	0.9	0.3
2	0.7	1.7	6.2	0.3	0.3
2.4	1	1	1	5.7	0.2
3.4	0.5	1.1	1.2	10.9	0.4
1.3	1	1.1	3.5	3.7	0.4
1.6	0.3	0.3	4.4	0.8	0.7
1.2	2.2	3.3	2.4	8.1	0.8
2.3	1	0.9	1	2.3	0.9
1.7	0.6	0.7	1.4	1.3	1.1
3.8	0.3	3.4	8.8	1.3	0.7
3.3	5.2	0.8	0.4	1	0.8
0.9	2.9	4.5	0.8	0.7	1.4
1.8	1.5	1.2	2.7	0.7	3.2
0.4	0.5	5.3	1	1.4	0.4
3.9	0.4	0.6	8.3	6.5	1.9
2.4	1.5	0.5	4.6	1.4	1.8
10.6	0.8	7.7	0.6	0.6	0.3
1.5	0.2	3.5	1.2	1.2	0.2
4	1.5	1.9	0.8	0.5	2.4
0.3	2.5	2.6	6.9	0.4	0.2
0.4	1.7	0.4	11.6	0.7	0.5
0.3	1.7	3.4	6.9	4.4	0.1
1.2	0.4	2.1	2.1	5.5	0.3
1	0.3	6.5	1	0.8	2.1
0.3	0.8	2.7	1.6	2.9	6.2
3.4	32.1	2.1	0.4	4.2	0.7
0.5	2.2	1.3	2.7	2.1	0.4
12.2	3.4	1.2	0.4	0.8	2.7
2.4	3.1	0.2	1.8	0.6	1.1
0.7	2.3	12.5	0.8	1.3	0.6
1.8	1.7	3.1	1.2	0.8	1.6
0.7	0.3	8.1	2.3	1.8	0.4
0.4	2	12.8	1.2	0.7	0.2
0.9	0.5	1.3	6.3	0.1	0.2
0.4	0.3	3.2	1.8	0.4	3.9
5.2	2.2	2.3	0.8	0.9	1.5
0.9	7.3	2.3	17.9	2	0.4
0.5	1.6	8.5	1.6	3.9	0.5
11.3	1.2	2.6	2	3.5	0.7
1.5	1	0.7	1.5	2.9	0.1
1.4	5.3	3.1	2.4	2.6	7.6
3.1	1.5	4.5	0.8	4.9	0.9
1.8	0.8	2.8	1.5	1.6	0.8
11.6	0.3	0.7	3.9	0.3	1.3
2.2	0.7	1.1	3.8	0.6	0.1
2.3	15.2	1	4.9	1.8	0.1
0.6	9.3	1.8	0.6	0.6	0.3
4.1	1.7	2	1.2	0.4	0.2
1.1	2	1.9	1.9	1.2	0.2
1.2	0.3	3.1	0.4	0.9	1.1
0.3	0.7	2.2	4.3	0.5	0.5
2.3	1.7	7	12.5	1.3	0.2
1.4	0.7	1	1.5	0.4	1.9
0.5	2.5	1.4	2.7	0.4	0.8
0.6	0.2	1.5	0.3	0.2	0.9
0.2	1.2	6.1	1.5	4.8	2.5
0.4	0.7	2.5	0.4	1.2	1.1
2.4	2.9	0.4	0.6	0.8	1.5
2.1	0.7	0.7	0.6	1.3	0.3
2.1	1.3	0.6	0.7	0.3	1
1.7	8	2	1.5	0.4	3.2
0.4	2.2	1.1	5.6	1.1	2.6
7.1	1.2	1.7	1.3	0.6	0.8
10.2	1.8	0.7	1.7	1.5	0.2
4.3	3.7	4.3	9.9	1.5	4.4
0.7	4	1.7	6.3	0.4	2.5
0.6	4.5	1.1	1	0.1	0.8
0.9	1.5	3.4	1.1	5.2	1.5
2.6	4.8	0.6	0.4	3.9	0.4
0.5	2.1	1.5	0.1	2.3	0.1
0.5	1.7	14	0.5	6.2	0.7
0.9	0.6	0.6	1.9	3.9	1.4
1.2	1.3	0.9	1	2.8	0.4
57.4	0.7	0.6	0.6	1.4	0.2
1.2	0.6	0.7	0.6	0.8	0.2
2.1	2.2	0.6	0.9	0.8	0.2
4.5	1.4	0.8	13.6	1.4	0.2
2.1	1	0.4	1.3	0.6	0.2
2.1	0.5	0.4	1	0.6	0.3
1.1	2.4	0.5	1.8	0.6	0.3
0.7	0.8	0.8	1	0.6	0.4
1.8	2.9	0.6	1.3	1.2	0.2
1.1	0.5	1.4	6.7	0.5	0.2
0.3	1.2	4	1.4	0.9	0.2
0.8	0.6	0.7	1.5	13.9	0.1
20.6	2.3	1.1	2.5	1	1.9
0.5	0.3	1	2.9	3.2	1.1
0.7	0.5	2.4	1.1	6.2	2.2
0.9	2.2	0.6	1.4	1	15.5
0.3	2.2	0.9	0.4	5.6	2
0.5	0.5	0.7	6.5	1	2.2
0.2	0.6	8.2	6.8	1.4	1.7
2.1	2.8	1.1	6.8	1.4	1.4
0.4	2.4	0.5	3.4	0.6	0.4
0.3	0.9	0.5	12.2	2.8	1.9
5.6	3.2	0.6	0.7	1.5	0.8
0.9	1.7	1.6	1	2.6	1.7
0.4	6.1	0.1	2.5	1.5	0.1
2.2	2.2	1.2	2.1	0.6	0.1
0.5	1.2	6.3	4.8	0.7	0.1
9.4	0.5	1.7	4.3	2.3	8.3
0.4	0.4	0.2	1.3	0.8	0.1
1.4	0.3	0.8	4.8	1.5	0.6
0.2	1.3	0.9	14.1	52.3	0.5
1.9	1.1	1.2	1.6	1	0.5
0.6	5.2	0.4	8.9	0.5	1.2
1.1	0.9	1.9	2.8	1.1	15.7
0.1	2.7	4.6	6.7	3.9	0.9
0.7	2.8	3	4.1	0.9	0.5
3.3	1.4	0.8	0.9	0.2	0.1
0.5	0.9	0.7	0.8	16.2	1.5
0.4	1.1	0.7	0.7	3.1	1.2
0.2	1.2	0.5	5.1	2.7	0.5
5.9	0.7	1.5	2.4	1.6	0.3
5.6	0.9	0.8	0.5	2.7	2
2	1.7	0.4	6.3	1.2	3.3
0.9	0.8	2	2.1	0.8	0.3
0.7	0.7	0.4	0.3	0.9	0.7
1.1	0.5	3.3	0.4	1	1.5
1.8	1	3.8	10.7	1.3	0.2
2	0.3	0.7	1	8	0.8
0.8	1.4	0.5	1.4	2.4	2.3
5.5	1.7	1.6	3.2	1.6	1.2
2	1.9	0.7	0.2	1.6	2.3
0.2	0.9	0.6	2.8	1.1	1.6
1.3	6.3	5.3	0.4	4.7	1
0.6	1.9	3.1	3.8	1.3	1.6
0.3	2.8	3.8	5	0.5	0.7
5.2	4.2	2.5	1.1	0.1	4.1
1.4	1	1	1.3	0.8	2.7
0.3	1.7	1.9	0.9	4.7	1.2
1.2	1.1	0.9	0.1	14.7	0.7
1.3	0.8	0.4	1.4	0.4	3
11.2	3	1.3	1.6	3.8	0.4
10.2	4.8	0.6	8.4	10.3	0.8
8.4	0.6	0.4	2.3	1.3	2.3
48.1	1.2	0.9	29	29.6	1
8.6	3	4.2	4.6	0.8	12.9
1.6	18.3	1.3	0.4	6.9	25.6
0.8	1.2	1	2.1	2.1	0.2
3.7	1	4.2	3.2	0.6	0.2
0.9	1.3	1.9	11.9	0.6	0.4
1.7	2.2	2.8	3.2	0.5	0.4
30.1	6.8	3	0.9	2.2	1
1.3	2.3	0.4	5	1.4	1.9
1.1	10	1.2	13.2	0.2	2.7
1.4	5	0.4	1.3	0.4	0.9
1.4	13	0.4	1.6	0.7	1.8
1.7	2.6	1.2	0.6	0.9	0.7
0.7	0.9	0.8	0.7	0.8	1.5
1.7	2.2	0.4	1.6	0.7	4.4
0.5	1.7	0.6	6.5	0.5	2.4
1.9	0.9	0.5	3.2	0.3	0.6
0.4	0.5	0.6	1	0.5	2.2
4.1	0.7	1.2	0.7	0.5	0.5
2.5	1	0.5	0.7	0.6	0.4
7	5.6	3.1	3.9	19.1	0.5
2	4.2	2	2.5	3.5	0.3
1.2	1.4	4.3	2.2	4.9	0.7
1.5	3.9	2.6	0.6	1.7	0.8
1.1	7.2	0.5	0.9	0.9	0.3
5.8	12.8	1.7	0.5	8	0.2
0.7	3.1	2	0.8	0.4	1.6
0.8	1.9	0.7	0.9	0.5	4.1
0.3	3.8	0.7	9.3	0.8	1.3
0.8	4.1	4.6	1.1	0.9	0.6
0.9	5.5	1.8	1.1	1	0.6
1.3	3.4	0.8	2	1	0.4
0.7	1.4	0.7	5.7	6.5	0.7
0.3	2.4	0.6	2.6	1.6	0.5
0.6	3.1	2	23.6	2.9	0.6
1.8	0.9	4.4	0.3	2	0.2
0.4	7.7	3.8	0.5	0.4	0.2
0.3	3	1.3	2.8	0.5	7.8
1	5.4	3.1	2.3	0.8	0.6
0.8	6.8	12.7	4.6	0.7	0.5
1.6	4.1	8.1	4.4	0.3	0.8
0.5	15.6	6.1	0.8	0.5	0.3
2.9	8.5	0.9	3	0.8	0.2
2.6	6.5	2.4	0.3	11.7	0.2
5.5	4.1	50.8	0.8	1.3	1.5
2.2	4.9	3.4	1.2	0.9	1.3
0.9	1	2.2	7.4	2.2	0.1
3.6	1.6	0.6	1.4	1.7	0.2
6.7	0.4	0.5	3.5	0.8	0.5
1	8.9	1.2	4.3	34.7	0.7
2.8	4.9	2.4	18.1	0.5	3.1
2.2	3.7	0.6	3.3	1.5	0.2
36.1	10.9	9.6	11.6	0.8	0.5
15.6	1.5	2.6	1.7	0.8	0.5
0.6	5.2	0.4	0.5	2	1.4
3.3	0.9	0.4	2.6	1.6	0.4
1	130.5	0.4	3.3	0.4	1.2
0.8	4.8	0.6	0.8	1.6	0.4
3.4	11.3	1.2	0.4	0.9	0.8
1.5	2.5	1.9	1.1	1.4	0.2
3	0.2	3.5	1.5	0.8	0.5
0.1	0.5	2	0.5	0.6	0.7
0.8	4.3	1	1.2	2.1	4.5
0.9	1.3	0.7	21.7	1.1	3.8
0.7	0.6	0.9	7	8.8	2.5
2.4	0.8	0.9	1.6	0.6	0.9
1.1	5.7	0.3	0.4	0.5	3.8
2.5	2.4	4	1.6	1.3	0.7
1.7	3.4	1.1	1.4	0.5	0.9
2.2	5.8	26.9	0.5	5.8	1.8
0.4	1.2	6.9	0.4	1.9	1.5
0.6	0.3	0.9	1.8	0.8	1.2
2	1.1	1.2	0.8	1.2	4
1.8	3	0.7	0.3	0.4	4.3
2.6	1.6	2.5	0.6	0.3	2.4
2.7	1.8	5.4	0.9	0.6	0.3
5.1	2.1	0.5	1.3	1.9	1.3
4.3	1.6	1.4	0.4	0.9	18.7
3	1.1	0.7	0.5	0.4	1.2
1.3	0.7	0.5	9.8	1	0.2
0.9	2.5	1.1	3.8	0.2	0.6
3.8	20.3	2.4	5.1	0.2	0.3
0.5	2.8	1.4	6.9	0.8	0.5
0.5	5.3	0.7	2.6	0.5	1.5
0.2	0.5	8.6	5.7	1.2	0.1
1.8	1.9	0.4	1.2	0.3	0.3
1.1	0.6	1.9	4.3	1.6	0.1
0.5	0.8	1	0.8	0.5	1.7
0.7	0.3	0.6	0.7	5.6	0.3
4.5	0.4	1.5	7.6	17.6	0.3
1.4	1.3	1	1	0.5	0.3
6.2	1.4	2.9	2.1	0.3	0.8
3.8	1.5	2.4	3.4	0.8	1.7
1	0.6	0.6	2.4	15.5	0.8
1.5	0.7	0.4	3.5	1.1	3.4
1.1	0.7	0.4	3	0.4	0.4
0.9	1.6	0.3	9.7	0.2	0.8
2.1	1.1	0.8	1.6	0.5	0.1
2	0.6	0.7	1.4	0.9	0.1
1.7	1.4	0.4	2.3	1	1.5
1.5	0.8	0.7	1.4	0.8	0.1
1.7	1.1	0.4	0.5	4.3	0.3
0.9	1.2	2	0.4	0.2	12.2
4.3	0.7	2.9	3.2	5.8	4.8
2.5	0.7	1	6.8	3.8	0.3
0.8	11.4	3	0.5	5.3	0.2
0.5	1	1.9	7.6	1.4	1.2
1.3	0.3	0.5	10.1	0.8	0.8
0.8	0.2	1.6	1.4	11.9	1.8
31.8	0.1	3.5	4.8	1.6	0.4
1.2	0.5	2.1	1.8	3.2	0.6
0.5	0.8	5.6	0.9	1.2	0.1
2.5	2.8	2.6	1.8	0.8	2.5
2	1.8	0.8	2.6	0.8	0.4
0.7	0.5	0.5	0.6	0.8	1.1
0.8	0.2	2.8	6.3	1.1	0.1
1.4	0.4	3.6	0.5	4.2	0.7
1	2.3	1.3	0.9	0.8	0.6
1	0.4	1.1	0.6	0.8	4
0.8	0.5	0.9	1.6	0.5	0.8
3.4	4	9.1	0.6	0.3	0.5
1	0.9	0.7	0.4	2	0.9
0.5	5	2.7	1.6	1	0.3
0.9	0.2	89.4	0.9	0.6	0.3
0.6	0.4	1.8	1.8	2	4.4
3.4	0.3	3.8	1.2	0.9	1.1
21.6	0.7	1.4	9.4	0.9	0.7
1.2	1.9	1.3	14.2	2	1
1.5	3.6	6.6	3.8	0.8	2.6
1.2	7.4	1	9	10.3	1.2
0.3	2.2	1.3	3.9	2.3	0.2
0.8	10.9	0.5	7.4	2.7	0.4
0.6	1	1.3	6.8	1.3	0.1
5.5	2	3.3	2.5	1.4	0.1
0.6	21.9	0.8	2.2	2.3	1.5
0.8	5.1	5.5	14.3	1.3	0.2
1	1.8	6.6	3.3	1.7	0.3
3.2	4.4	5.3	0.7	0.4	1.8
1.6	5.3	4.9	6.8	0.6	0.3
1.2	1.3	2.9	1.1	0.5	1.8
1.2	9.2	1.2	7.3	9.2	2
6.2	1.5	0.4	11.7	0.8	0.7
1.9	1.5	0.7	4.3	0.7	0.3
0.2	14.3	0.8	1.4	0.9	0.2
2.1	2.7	1	0.6	1.2	0.8
1.1	1.5	0.8	3.6	15.5	0.1
1.1	0.2	1.1	12.6	6.7	0.9
1.3	0.4	0.7	4.3	1.1	0.1
0.5	6.1	1.2	6.8	0.7	2.4
0.5	2.1	1.6	4.7	0.4	1.3
4.1	4	1.8	1.1	0.8	1
5.8	0.6	0.6	1.3	1.1	1.5
9.6	22.5	3.4	1.6	0.6	0.2
2.6	10.1	1.2	0.5	5.9	2.3
1.6	3.5	12.1	6.2	3.4	1.1
0.7	1	72	0.9	1.1	0.7
1.8	1	5.2	10.8	1.1	0.2
3.3	0.4	3.2	0.2	39	0.5
1.2	2.5	13.8	0.3	1.9	0.5
53.9	7.7	0.5	0.6	1.3	0.3
7.5	3	0.7	0.9	0.5	0.7
2.3	1.8	0.2	0.6	0.8	0.7
0.8	1.4	0.9	4	2	0.6
1.7	0.8	0.5	0.4	0.8	0.1
1.5	2.1	4.4	0.3	0.7	0.3
1.9	1.5	0.5	1.6	1	0.2
2.5	1.2	0.8	1.2	0.5	0.2
0.8	30.3	1.5	1.3	0.4	0.9
1.1	3	0.5	1.6	1.2	0.4
7.9	0.9	22.2	3.8	0.4	1.9
7.5	1.1	2.3	0.4	0.5	0.5
4.9	1.7	0.6	0.3	140.6	0.7
4.6	6.5	0.5	0.6	3.5	0.2
3.4	8.9	0.4	0.2	0.8	0.6
3.1	2.5	1.1	0.5	0.2	0.2
2.5	0.6	2.9	1.1	12.5	0.5
2.1	1.3	2.3	11.4	0.4	1.7
2	0.9	1	5.7	1	0.9
1.2	2.1	0.4	2.3	4.2	10.1
4.5	0.8	0.6	3	0.4	0.5
0.7	1.7	0.4	0.6	0.7	0.5
116.9	0.6	1.8	5.1	1	0.2
0.7	0.5	0.5	1.6	0.7	0.3
1	6.8	0.6	1.4	15.6	0.1
0.8	1.5	0.2	8.6	5.8	0.6
2.8	1.1	4.3	20	0.4	0.2
0.6	0.9	4.3	5.4	1.4	0.7
2.2	5.9	0.5	0.8	1	0.4
3	1.3	0.9	14.6	2.3	0.6
1.5	2.7	2	3.3	6.1	0.4
0.9	4.4	2.1	1.2	0.7	0.2
0.5	1	0.7	0.7	1	0.2
0.6	1.1	2.4	6.5	13.4	0.7
0.7	3.2	0.5	0.6	10.5	0.6
0.3	2.4	3.1	8.1	48.9	0.4
6.6	1.2	0.8	4.1	6.6	0.5
0.5	1	1	10.3	0.6	0.8
0.6	4.7	1	0.9	0.7	1
0.8	2.4	1.2	1.5	0.8	2
0.5	1.1	1	31.9	0.4	0.2
0.2	0.9	9.4	3.4	0.8	0.2
1.2	0.8	1.7	0.5	1.4	0.4
0.6	1.9	10.8	0.7	0.5	1.4
0.4	0.7	7.3	0.8	1.1	0.1
0.6	1.5	23.1	1	0.8	0.5
0.7	1.7	2	0.5	8.6	0.8
0.4	2.1	1.6	30.9	3	0.4
0.3	2.1	5.3	23.8	0.7	16.4
0.9	2.2	5.3	0.5	0.4	0.2
0.8	2.2	1.2	2.6	0.9	1.4
0.1	0.8	0.8	3.8	1.1	0.5
0.3	1.8	0.8	10.6	0.5	0.3
0.2	1.3	0.4	13.9	0.8	0.1
0.4	0.5	1.2	3.2	0.2	0.5
4.4	4	0.7	2.3	0.4	0.3
15.6	4.4	3.3	1	3.4	0.2
6.5	4.3	2.4	5	3.5	0.3
0.9	142.3	1.2	0.8	1.2	0.9
0.5	0.7	1.7	0.1	0.7	0.1
80	0.5	0.6	3	1.6	1.3
9.2	0.9	1.1	1.8	1.2	0.7
11.2	9.3	1.4	1.8	0.4	2.3
4.2	1.1	0.9	5.6	24.5	1.1
2.7	1.3	0.7	0.9	5.4	3.5
2.3	5.9	0.3	1.1	2.4	0.2
17.2	5	0.7	2.3	3	0.4
0.8	2.2	5.2	2.3	1.3	3.2
3.6	0.6	0.6	2.7	1.7	1.1
2	1.2	0.2	2.3	2.2	0.8
1.1	0.5	4.8	11.2	0.5	2
1.4	3.7	6.5	3.5	0.2	1
1	0.8	3.3	3.2	0.8	32.5
0.6	0.8	1.6	3.1	0.3	1.1
2.5	1	1.8	1.5	0.9	0.6
0.7	1.5	6.5	6.6	0.8	1.7
1.8	0.9	1.5	0.4	1.6	0.4
1.6	2	2	0.2	1.7	0.3
0.8	3.7	1.2	0.3	0.2	0.3
3.7	2.4	3.1	0.1	0.7	0.2
1.2	2.7	1	9.1	1.7	0.4
3	3.5	2.1	0.6	2.7	1
9.7	1.4	0.7	0.7	1.4	1.7
1	2.9	1.1	0.7	0.9	0.7
9.5	1.6	0.6	0.9	0.7	0.7
0.9	1.8	12	1.3	0.4	0.9
1.4	0.9	2.2	1.8	0.4	1
0.2	0.6	0.5	2.4	2.9	0.5
0.6	0.8	1.1	2.5	7	1
1.3	1.1	3.7	1.5	0.4	0.4
0.4	0.8	0.5	0.3	1	1.1
0.2	1.4	2.3	3.8	0.2	0.5
0.2	2.3	1.2	4.9	0.3	1.3
3.9	1	5.1	1.5	0.2	0.3
1.5	0.5	2.6	0.9	0.7	0.5
1.2	0.2	4.7	0.8	0.6	1
0.4	0.2	3.3	1.5	4.6	0.5
0.9	0.6	2	43.1	2.2	2.6
1.2	1	2.1	1.1	0.4	0.7
2	0.9	2.8	1.7	0.2	0.7
1.1	0.6	1.2	7.7	0.5	0.3
0.2	0.3	0.7	3.4	0.1	0.7
8.4	4.7	0.8	0.3	0.3	1
0.3	6.3	0.8	0.9	3.3	0.2
1.2	1.6	0.6	0.7	0.9	0.7
	0.4	7.5	3.8	1.6	0.1
	2.5	0.7	0.8	0.4	1.5
	2.8	12.9	1.7	0.8	0.9
	3.2	1.4	0.7	0.4	1.3
	2.4	5.5	1	0.9	0.9
	5	7.8	0.2	1.4	0.3
	1.5	0.6	17.9	0.6	4.1
	0.7	1.4	10	0.8	0.2
	0.5	0.7	1.4	0.3	2.1
	1.1	4.8	0.8	14	0.6
	3.8	2.3	4	14.1	0.3
	1	1.5	11.3	0.9	0.2
	0.7	0.9	7.5	25	0.9
	1.1	1.4	4.6	0.3	2.6
	2	0.5	0.2	0.2	0.3
	0.7	0.5	0.5	4.5	1.2
	0.7	0.5	3.9	11.9	1.7
	0.6	0.4	2.9	1.3	0.5
	1	1.7	3.3	0.8	8.3
	2.3	1.9	1.9	0.4	5.8
	10.7	0.3	19.8	0.8	3.4
	2.3	1.9	3	0.8	1.3
	2.1	0.4	6.8	1.2	1.4
	1.8	0.4	10.9	1.5	3.1
	2.6	1	8.7	0.4	0.4
	0.9	0.9	5	0.8	2.6
	0.4	0.4	2.3	0.1	2.3
	6.8	0.3	2.3	0.3	1
	3.4	0.3	1	1.7	1.4
	1.5	14.3	3.8	0.4	2.2
	0.8	0.1	8.2	12.1	0.2
	2	0.9	0.6	0.7	2.6
	1.5	11.2	1.2	0.8	1
	5.1	0.9	0.7	0.8	0.8
	0.6	1.5	6.5	1.4	2.4
	1.5	6.2	4.5	0.4	101.1
	0.4	0.4	2	1.4	6
	2.7	6.3	3.7	3.3	0.4
	3.1	2.8	5.4	2	2.4
	4.4	16.6	1.8	0.5	6.1
	4	2.2	3.3	0.6	3.1
	0.7	1.5	8.2	3.4	1.3
	0.4	8.8	1.1	5.2	2.6
	0.9	2.7	0.8	1.2	1.8
	15.6	1.8	0.9	0.8	1.8
	0.5	1	0.4	5.6	2.8
	16.5	1.4	2	2.3	0.7
	1.1	1	0.9	0.3	1.5
	5.2	2.3	1.4	0.1	0.6
	2.1	3	9.3	5.8	1.5
	0.7	1.2	1.1	0.3	1.4
	3	0.8	0.5	0.4	1.2
	10.5	0.7	16	0.7	2.1
	0.8	0.2	1	0.3	1.7
	0.7	3.9	3.7	0.7	2.7
	0.3	0.3	0.9	7.5	41.6
	1.2	3.6	0.2	1	0.9
	2.8	11.5	1.4	4.2	0.2
	4.2	0.6	1	0.2	1.3
	1.3	0.5	0.4	2	1.9
	1.2	4.2	0.3	0.9	4
	0.7	0.5	21.3	0.6	0.8
	0.7	0.3	0.7	0.3	1.1
	1.8	1.3	0.5	6.6	0.9
	0.9	0.2	0.1	2.8	0.7
	4.2	0.6	8.7	0.5	0.5
	0.3	10.2	5.9	0.5	0.4
	2	12.4	1.1	4.1	0.4
	0.7	1.8	0.5	5.3	1.2
	2.3	0.6	1	0.6	1.4
	12	0.1	0.4	0.6	4
	2.9	1.6	0.2	1.2	0.8
	2.2	1.3	0.3	1.7	0.9
	6	2.5	0.4	7.4	0.8
	3.7	1.7	0.9	2.8	0.4
	0.8	7.2	0.5	3	0.5
	2.4	1	2.2	1	0.7
	2.5	1.3	1.5	1	0.8
	3.4	0.7	0.9	1.7	0.4
	6.2	0.5	0.7	0.7	0.6
	4.3	1.7	6.1	0.4	0.6
	1	6.3	11.1	0.3	0.4
	1.5	3	1.5	0.3	0.3
	1.5	0.6	1.7	0.3	0.3
	2.1	1.2	1.8	0.4	0.4
	2.4	1.1	0.5	2.8	0.5
	1.6	5.1	4.6	1	0.3
	6.9	1.1	6.8	0.5	0.2
	1	2.5	0.5	1.8	1.2
	2.5	1.4	1.2	1.8	0.4
	2.5	1.7	3.7	0.6	0.7
	1.3	0.7	0.6	0.6	0.3
	12.6	9.9	3.4	0.4	0.1
	1.8	8.9	1	0.4	1.1
	3.6	8.8	0.4	0.3	0.4
	1.6	1.9	2.9	0.5	0.4
	2.3	5.8	6.7	0.1	0.2
	20.1	14.4	1.1	0.5	0.1
	3.8	0.6	3.9	2.1	0.3
	7.9	0.9	0.4	6.4	0.6
	1.4	13.5	2.6	3.2	0.7
	0.4	0.9	2.5	11	0.2
	0.3	1.3	1.8	5.8	0.2
		1.8	3.4	2.2	0.2
		1.7	1.1	1.5	0.2
		1.1	0.7	1.3	0.2
		3.1	6.6	1.6	1
		0.2	4.4	0.7	0.4
		1.1	4.4	1.1	1
		2.1	1.3	1.1	0.2
		1.8	10.2	4.1	1.2
		6.7	3	0.6	0.7
		7.5	3.3	2.9	0.1
		5.1	3.5	0.3	0.1
		24.2	6.7	2.2	0.4
		1.9	5.1	0.9	0.2
		1	12.9	1	0.7
		2.2	0.4	0.9	0.4
		0.8	4	0.3	0.4
		10.6	1.7	1.2	1
		2.3	5.2	0.8	0.2
		0.6	31.9	1.6	0.4
		0.4	2.6	0.5	0.3
		2.2	2.3	3.5	0.5
		0.2	4.1	3	0.5
		0.4	2.1	4.6	0.4
		0.7	3.1	1.6	0.1
		0.5	0.9	0.5	0.2
		1.2	5.7	0.3	0.4
		2.3	2.2	1.2	0.3
		2.2	0.6	1.1	0.4
		0.2	1.6	2.7	0.3
		0.4	0.6	2.9	0.3
		0.9	1.4	1.6	0.4
		0.9	2.7	1.6	0.3
		1.1	2.6	1.2	0.2
		0.8	0.7	0.8	0.2
		3.1	2.4	7.6	1.2
		0.9	0.6	5.5	0.3
		1.4	2	1.1	1.2
		0.9	0.8	1.9	1.1
		0.4	1.7	1.1	0.8
		2.1	1.4	9.9	1.5
		1.3	36.6	2.2	1.3
		3.2	1.9	0.9	1.2
		2.4	1.1	1.5	51.8
		0.6	1	1	1
		0.4	1.9	0.3	1.6
		1.5	0.8	0.9	1.9
		7.7	6.2	0.7	0.8
		0.3	0.2	1.9	0.5
		5.2	1.4	0.3	2
		5.9	6.2	0.5	2.5
		1	0.4	1.9	0.2
		1.3	2.2	0.6	0.3
		0.5	4	0.5	0.7
		2.5	2.2	0.3	0.3
		0.7	3.2	1.3	0.9
		2.7	3.7	1.4	2.2
		6.7	1.3	1.1	0.5
		0.7	1.1	4.7	0.9
		1.6	0.5	1.2	4.1
		6.4	8.3	0.4	0.7
		0.7	1.2	0.3	1.3
		0.6	0.5	0.8	0.4
		0.7	0.6	0.6	0.3
		1.8	0.5	1.2	1.1
		0.7	31.2	0.5	2.5
		0.3	0.5	0.4	0.6
		0.5	1.8	0.3	0.4
		2.3	2.7	17	3.5
		2.6	3.3	13.1	1.3
		7.5	0.3	4.7	0.3
		4.1	1.3	1.5	1.4
		2	1.9	0.5	0.2
		0.6	1.5	0.5	0.3
		1	0.1	0.9	0.1
		1	0.2	0.6	0.7
		0.4	0.6	0.4	0.1
		1.1	0.9	0.6	0.5
		1.4	19.6	1.3	0.1
		0.8	2.1	1	3.7
		2.1	9.2	1.4	0.4
		1	1.7		0.2
		2.9	1		1
		1.2	4.4		0.8
		0.9	1.2		0.9
		0.4	0.5		0.2
		2.9	1.3		0.6
		7.1	1.1		4.5
		5.7	0.6		0.5
		1	0.4		0.5
		2.8	1.1		0.5
		0.9	1.8		9.7
		0.3	5.2		2.7
		1.7	0.9		0.7
		2.1	3		1.3
		1.1	2.7		0.3
		0.5	0.5		0.4
		3	2.2		0.3
		1.1	3.5		0.1
		0.9	1
		2.5	1.7
		13.7	3.5
		5.3	1.9
		4.2	0.4
		1.6	0.4
		1.7	1.1
		7.1	0.7
		9	1.2
		4.7	1.1
		2.8	1.1
		2.9	4.3
		0.3	0.9
		0.2	0.7
		0.5	1.7
		20.9	2.8
		1.2	2.7
		1.9	1.8
		1.3	0.3
		13.2	15.5
		0.5	1.6
		0.2	1.7
		1.1	1.5
		45.7	1.6
		1.1	0.9
		0.8	0.5
		0.5	1.5
		0.5	3.9
		69.2	1.2
		10	1
		0.6	0.4
		1.7	1
		1.5	0.2
		2.7	1.2
		1	0.7
		0.5	2.5
		1.3	5.8
		1	1.5
		0.1	2.6
		1.5	1.1
		1.4	3.1
		1.2	1.8
		1.3	0.5
		0.5	0.1
		17.7	1.2
		0.4	3.6
		1.1	0.6
		3.1	6.3
		1.3	0.3
		0.5	0.3
		2.5	1.3
		1.6	3.2
		1.3	0.9
		4.7	0.5
		0.8	0.5
		0.8	5.3
		7.6	2.6
		0.9	0.4
		24.8	0.6
		1.7	16
		0.8	4.2
		0.6	2.5
		0.7	0.4
		52.5	0.7
		1.6	4.5
		1.3	1.6
		0.4	2.1
		0.4	0.3
		1	0.5
		1.1	1.8
		0.7	10
		0.5	1.9
		1.1	0.6
		8	5.3
		2.2	1.1
		1.8	0.5
		2.1	0.6
		1.8	27.4
		0.8	0.8
		1.2	1.6
		1.9	9.2
		0.3	1.8
		2.1	11.3
		0.7	1.1
			20.5
			1.1
			3.6
			0.3
			0.5
			2.8
			1
			2.5
			2.3
			1.9
			16.9
			2.2
			0.4
			2.7
			8.8
			0.6
			8.6
			1.9
			14.1
			6.4
			1.3
			0.4
			0.7
			3.3
			1.9
			11.2
			7.9
			4.8
			0.7
			1.6
			0.4
			0.5
			5.1
			6.1
			9.5
			4.5
			2.8
			6.1
			0.7
			1
			6.7
			11.8
			1.1
			3.1
			2.9
			2.4
			34.8
			1.4
			1
			0.3
			0.7
			37.3
			24.3
			0.8
			2.4
			1.2
			0.5
			3.7
			6.6
			1.8
			1.8
			2.5
			1.3
			5.9
			4.4
			11.3
			2.5
			2.1
			0.8
			2.1
			3
			1.4
			0.9
			1.7
			0.8
			29.9
			0.7
			0.6
			1.2
			0.6
			0.4
			0.6
			1.5
			0.8
			0.9
			1.4
			0.6
			1.3
			0.6
			0.5
			1.1
			0.7
			0.8
			9.7
			1.4
			1.6
			0.9
			0.7
			0.7
			0.6
			4.6
			10.3
			0.8
			2.7
			1.3
			1.4
			1.7
			0.9
			13.1
			0.9
			19.6
			0.5
			0.7
			2.7
			5
			7
			2.8
			1.6
			1.1
			1.5
			8.2
			0.8
			3.5
			7.7
			0.9
			1.9
			1.1
			6.9
			30.8
			1.3
			0.6
			5.9
			5.3
			0.5
			1.2
			1.9
			2.6
			6.1
			0.4
			1.2
			8.5
			1
			1
			0.8
			7.3
			3.8
			2.2
			4.5
			1.3
			8.4
			0.7
			2.1
			1.1
			3.8
			0.9
			3.4
			2.6
			2.8
			0.8
			0.6
			2
			1
			3.3
			7.7
			0.7
			10.2
			0.8
			1.1
			10.1
			11.3
			0.2
			7.9
			1.1
			1.7
			8.5
			3.2
			1.2
			0.7
			1
			6.1
			2.6
			42.2
			3.9
			0.4
			1.6
			2.7
			0.7
			0.9
			2.3
			1.9
			1.5
			0.9
			10
			1.1
			0.4
			77.8
			4.3
			3.1
			1.1
			1.1
			5
			0.8
			1.6
			6.2
			2.4
			3.1
			1
			1
			5.8
			1
			5.6
			0.8
			0.7
			2
			2.4
			0.4
			4.8
			0.7
			0.2
			0.5
			0.8
			8.2
			3.7
			0.6
			1.9
			3.5
			1.1
			5.7
			1.1
			4.2
			1.5
			0.3
			0.3
			0.1
			1.8
			1
			2.9
			1
			2.2
			6.6
			1.2
			0.7
			5.5
			30.2
			3.3
			44.9
			0.6
			1.1
			5.5
			0.4
			0.8
			2.8
			8.5
			5.4
			2.3
			2
			0.8
			2
			3.9
			3.1
			3.5
			9.6
			1.3
			1.2
			2.6
			2.1
			0.4
			1
			6.9
			0.6
			1.9
			14.9
			0.9
			4.1
			11.2
			2.9
			11.3
			3.3
			1.7
			2.1
			2.6
			0.6
			2.4
			1.6
			2.3
			1.5
			3.8
			7.1
			2.2
			0.3
			5.8
			1
			0.9
			1.8
			2.6
			17.8
			0.4
			2
			1.2
			4.5
			0.4
			0.6
			0.4
			1.4
			2.4
			0.6
			0.9
			0.7
			0.4
			1.3
			0.8
			2
			0.8
			1.1
			0.1
			0.5
			0.7
			1.5
			0.6
			2.1
			0.5
			12.1
			1.2
			0.5
			3.2
			0.7
			0.8
			0.8
			2
			9.7
			11.2
			1.5
			0.3
			7.4
			1.2
			3.7
			1.8
			1.5
			7.3
			1.5
			0.4
			0.2
			0.7
			0.9
			3.2
			0.6
			1
			7.3
			0.3
			0.9
			10
			1.2
			4
			8.4
			0.7
			0.6
			5.2
			1.4
			1.1
			0.7
			1.1
			2.2
			3.3
			0.6
			5.6
			5.7
			0.4
			0.2
			0.6
			0.5
			12.4
			7.8
			0.9
			10.6
			0.7
			0.6
			0.5
			1.5
			0.4
			0.4
			0.8
			1.3
			1.9
			0.8
			1.5
			0.1
			1
			5
			5.2
			1.1
			1.4
			1.5
			0.9
			0.2
			0.6
			0.2
			0.6
			0.8
			1.7
			0.7
			0.1
			1.5
			1.2
			2.1
			0.9
			1
			2.8
			2.5
			0.7
			4.1
			11.9
			0.9
			0.2
			0.2
			1.6
			1.9
			0.4
			1
			15.2
			0.7
			0.4
			0.4
			1.2
			0.9
			0.8
			112.2
			4.8
			0.3
			0.6
			0.5
			0.6
			1
			0.8
			4.8
			17.4
			17.9
			1.3
			0.5
			0.3
			0.4
			0.7
			1.4
			1.1
			0.4
			0.6
			3.9
			0.5
			7.2
			2.4
			3.5
			5.7
			7.1
			4.5
			2.3
			4.6
			7.3
			7.4
			6.4
			1.8
			0.5
			0.9
			1.9
			0.8
			0.8
			0.8
			0.6
			80.6
			7.3
			5.5
			3.7
			2.9
			2.7
			1.3
			0.7
			3.2
			2.4
			1.6
			8.1
			1.8
			1.3
			0.7
			0.5
			0.7
			1.6
			1.6
			1
			3.3
			2.2
			0.8
			9.2
			1.1
			0.9
			0.2
			0.5
			0.5
			1.3
			0.9
			0.4
			3
			0.4
			2.6
			3.2
			1.1
			2.7
			1.4
			0.6
			0.5
			3.1
			2.7
			1.1
			3.6
			9.4
			7.7
			2.6
			4.4
			1.5
			2.2
			1.7
			0.8
			0.8
			0.5
			0.5
			0.6
			1.2
			2.2
			1.4
			13.1
			13.3
			0.5
			2.6
			2.1
			0.7
			0.1
			0.4
			0.6
			7.5
			0.6
			7.4
			0.9
			1.2
			0.6
			1.2
			0.7
			0.6
			0.1
			0.2
			0.3
			2.2
			0.2
			3.3
			2.4
			2.9
			0.6
			0.6
			4
			0.4
			0.5
			0.3
			5.8
			0.4
			0.5
			0.3
			0.8
			0.6
			0.3
			0.4
			0.4
			6.4
			3.2
			4.6
			11.3
			1.5
			15.3
			3.9
			10.1
			0.6
			2.3
			3.7
			0.5
			4.2
			1.9
			2.3
			0.7
			0.8
			3.3
			0.7
			1.1
			1.1
			5.5
			1.2
			3.7
			0.6
			1.2
			0.5
			0.9
			1
			0.6
			0.7
			0.6
			0.6
			0.1
			3
			0.9
			0.5
			1.6
			4.2
			0.5
			0.4
			2.3
			0.8
			1.5
			1.5
			0.7
			0.9
			0.8
			0.4
			4.9
			0.5
			5.2
			1.6
			0.4
			0.1
			0.5
			0.9
			0.5
			1.3
			2
			0.1
			6.7
			1.2
			0.6
			14.3
			0.7
			1.5
			0.4
			0.1
			1.6
			0.5
			1.5

## Sheet: Figure 2C
Table of residence times (sec) for Figure 2C
Ndc80 mut C + Dam1 B phos	Ndc80 mut B + Dam1 C phos	Ndc80 mut A + Dam1 B phos	Ndc80 mut B + Dam1 A phos	Ndc80 mut A + Dam1 C phos	Ndc80 mut C + Dam1 A phos
2.4	0.5	0.9	3.7	0.6	4.1
0.4	1.2	0.4	0.3	2.1	2.9
1.1	0.6	3	2.3	1.9	0.9
18.2	0.6	1.3	8.6	0.1	1.2
1.4	0.2	2.3	0.5	0.3	1.1
0.6	0.1	0.4	0.7	0.5	2.3
1.5	5.5	0.7	2	0.8	1.1
0.1	3.1	0.6	3.1	5.2	2.1
0.1	0.5	0.4	1.6	0.7	1.4
1.9	0.2	67.5	2.4	0.5	1.6
1.3	10.8	1.4	1.6	2.6	27.5
0.8	4	0.9	1	27.4	2.9
0.7	0.5	0.6	4.3	18.9	7.5
0.4	0.2	0.7	1.6	3.8	1
1	0.4	0.5	0.1	5.3	2.2
0.5	0.7	0.3	6.9	0.5	0.8
1.3	62.4	0.2	0.4	0.3	0.4
4.9	4.4	0.5	1.9	1	30.7
0.2	51	0.6	19.4	0.6	1.5
0.5	1.6	3.1	0.3	2.5	0.5
0.7	0.1	1.9	0.1	0.6	2.2
2.2	0.7	1.6	1.8	0.8	3.7
1.2	0.8	0.5	1.1	0.4	0.6
1.1	0.5	0.6	0.7	0.3	0.9
0.8	0.5	0.6	0.6	3.4	0.3
39.6	7.4	2.9	0.6	0.5	0.5
30.2	11.4	1.6	0.3	0.6	0.4
4.8	2.1	0.3	0.3	1	4.3
3	0.6	3.5	0.5	0.5	0.9
0.6	18.2	4.1	0.9	77.2	0.9
1.9	21	0.3	0.9	0.5	0.9
4.2	53.5	0.6	4.8	0.6	0.7
7.3	0.2	2.2	13.4	1.3	0.2
0.8	0.2	2	0.5	0.7	1.1
1.1	0.1	0.9	3.5	0.1	0.5
0.8	0.3	8.6	0.9	0.3	2
1.8	0.4	11.9	11.7	1.6	0.4
9	3.1	5.2	0.6	10.3	0.6
86.9	0.5	0.2	0.1	1.3	3
1.5	0.3	0.7	1.3	2.3	0.3
8.2	0.2	7.3	0.4	3.4	13.9
2.4	0.7	1.3	1.4	2.4	2.3
1.3	8.6	3.2	1.4	0.4	0.6
3	4.8	1.8	4.1	1.3	2.2
4.3	9.7	0.7	0.7	2.8	45
0.8	0.6	0.5	1.2	1.4	1.1
0.9	4.8	0.3	1.1	0.7	0.4
0.7	15.5	0.2	6.3	0.1	0.2
0.7	0.5	0.2	1.4	0.2	0.2
0.3	71.3	13.9	5.3	1.6	0.6
6	25.9	1.2	3.4	1.9	0.1
0.3	0.2	8.8	0.8	0.6	1.1
0.2	1	7.1	0.7	3.4	5.1
0.3	18.2	1.1	3.8	1.8	3.6
0.4	0.5	2	0.6	0.2	0.6
0.5	0.3	5.7	1	2.2	0.4
0.2	1.4	1.7	0.4	0.1	0.4
0.2	0.4	0.6	0.1	0.5	0.6
0.9	0.2	3.3	0.5	2.7	1.3
0.6	0.4	2.2	0.2	0.1	1.3
0.5	0.6	3.6	1.3	6.5	1.1
4.3	0.3	1.2	5.7	0.7	0.6
1.6	0.3	41.9	0.5	0.3	0.4
0.5	0.3	0.6	1.3	0.4	7.9
0.3	0.4	0.1	0.3	1	2
0.6	0.2	2.7	0.2	1.6	2.3
0.4	2.9	0.2	0.4	8	1.1
1.3	0.6	1.2	0.5	0.3	2.7
1.2	3.4	0.4	17.1	0.2	2.1
0.2	0.8	1.1	0.3	0.1	1.3
5	1.8	0.9	2.2	0.8	0.7
1.5	1.1	4.1	10.8	0.2	1.3
0.5	1.6	1	1.2	0.5	0.5
0.4	0.8	0.6	55.7	1.1	1
0.8	0.4	1.2	0.3	1.2	2.5
1.1	0.5	1.5	0.1	1.1	1.7
4.4	18.4	2	2.4	0.2	0.4
55.4	0.7	1	5.1	0.3	3.1
17.4	1.1	1.2	3.3	0.8	0.4
1.1	0.7	2.5	0.6	6.2	1.4
10.2	0.5	0.7	0.7	0.8	1.5
1.6	0.4	0.5	0.4	1.5	4.5
6.3	0.3	0.2	1	1.5	0.5
5.4	0.3	4.4	10.7	0.5	1.1
7	0.9	0.6	0.2	0.3	1
1.1	0.6	1.6	0.5	1	1
5.5	26.8	0.7	0.6	0.2	0.7
0.2	50.7	0.2	0.3	0.7	0.6
0.6	0.6	0.3	0.7	1.5	1.5
1.4	0.2	0.6	1.9	0.8	1
1.1	0.4	1.1	0.4	12.3	3.2
1.9	0.2	0.3	0.5	127.1	1.7
0.7	0.9	0.2	1.9	8.1	1.4
0.6	0.7	0.2	16.1	0.7	1.3
0.4	1.6	0.4	18.5	1.6	1.5
3.2	1.9	1.2	0.1	1.5	2.4
6	0.4	9.1	0.3	0.5	1.1
1.4	0.8	1	2.9	0.4	0.9
0.6	1.6	0.8	1.3	1	1.2
1.5	6.5	0.6	3.1	1.2	12.9
123	0.9	1.8	0.7	1.1	0.9
1.3	2.6	0.5	1.3	0.6	0.5
1.6	0.7	0.4	0.7	4.2	1.4
1.3	0.3	7	0.2	0.9	1
0.5	0.3	2.5	0.3	0.5	0.9
1.7	0.5	2.9	0.4	0.5	2.5
2.3	10.5	2	0.4	1.1	1.8
0.2	0.3	0.3	17.3	0.1	0.8
0.8	0.5	0.5	10.5	2.3	0.5
2.7	0.2	0.2	0.5	0.3	0.9
0.8	0.4	0.2	0.3	0.5	23.3
2.7	0.3	3.5	19.7	0.8	10.9
1	0.3	0.6	0.6	0.5	0.2
4	0.5	0.1	0.3	0.7	0.7
1.1	0.3	72.9	0.4	0.7	0.9
1.4	0.2	2.1	11.6	1.6	1.6
2	64.2	0.8	1.7	0.7	1.1
0.8	0.1	1	0.6	1.7	4.5
1.5	0.4	0.3	0.1	1.2	0.9
0.7	0.4	0.8	0.3	1.2	1.4
1.4	0.7	1.4	0.6	3.8	20.4
1.1	0.5	1	0.2	1	13.2
3	0.6	0.3	1.2	0.4	2.1
3	0.4	0.2	1.3	0.4	1.5
0.4	8.1	0.2	0.3	1.4	1.2
1.4	0.2	3.9	0.8	18.1	0.6
0.7	2.3	0.6	0.3	0.9	0.9
0.3	1.8	1.9	0.9	0.2	0.9
0.2	1.5	0.7	0.6	2.2	1.2
0.2	6.6	0.1	0.2	0.9	0.6
1.9	14.7	9	0.8	2.5	1.4
0.4	0.3	2.2	1	0.6	1
1.1	4.7	0.3	0.3	2.5	1
2.1	3.2	0.9	0.6	0.7	1.4
2.2	2.3	2.7	0.9	0.7	5.2
1.7	0.5	2.3	3.2	0.8	5.2
1.2	5.3	1.4	0.8	0.9	14.8
1.4	1.3	1.2	1.9	1.9	1
3.1	0.6	2.2	14	1.8	0.8
1.1	0.5	5.1	9.5	0.4	2.4
1.5	3.5	0.3	9.7	1.4	7.8
1.2	0.1	1	0.3	0.5	0.5
0.5	0.5	1.6	0.1	1.5	0.5
4.4	1.3	0.1	1.9	0.8	1.2
0.5	1.5	0.3	1	1.1	0.2
0.3	0.7	0.5	5	0.5	0.3
3.4	1.4	1.1	1.1	0.4	0.4
0.3	0.6	8.4	0.1	0.4	1.1
0.2	11.9	3.9	0.3	1.1	0.8
0.6	0.5	1	0.4	2.1	0.2
1.7	0.7	0.1	0.5	0.3	0.8
0.6	0.5	0.7	0.5	0.4	0.6
0.3	1.1	0.5	2.6	1.9	4.8
0.6	15.6	0.8	0.2	0.7	3.7
0.2	1.7	2.5	0.3	0.5	6.9
0.6	0.4	34.1	0.3	3.7	1.4
0.5	6.4	21.2	0.7	0.5	2.2
1.7	4.5	12.7	0.4	0.4	0.2
1.3	0.3	3.5	0.6	2.9	2.3
0.2	0.7	1.9	0.3	1.6	0.7
0.4	13.7	4.2	3.1	0.9	3.9
7.1	1.9	0.5	0.1	0.3	1
0.5	0.5	1.5	0.1	1.9	0.7
3.2	3.6	0.3	1.1	1.3	1.8
2.3	2.2	1	0.3	0.4	1
0.1	0.1	6.4	0.3	1	0.8
0.7	0.7	0.1	0.1	1.4	1.4
5	9	1.6	0.3	1.2	1.4
0.5	0.4	1.3	1.7	0.8	2.5
1.4	0.5	1.4	0.4	1.4	0.7
5.2	1.6	3.7	0.2	0.5	1
0.7	0.6	6.6	1.7	1.8	0.5
1.3	3.3	0.9	5.9	0.8	0.8
0.9	0.3	0.1	0.4	0.7	0.8
2.1	1.1	2.6	0.5	1	3.1
2.1	0.4	0.6	0.5	5.3	1.4
1.3	0.8	4.5	0.8	1.8	4
1.1	0.5	2.6	0.5	0.9	0.5
3	0.4	2.5	0.8	1.6	1.9
0.4	27	1.1	1.2	0.9	1.4
0.2	1.1	0.7	1.4	0.5	0.8
0.6	0.9	0.7	1.1	0.2	0.3
0.6	0.4	0.4	0.1	2.3	0.1
2.1	0.7	16.9	0.5	2.6	6.1
0.2	1.1	1	0.3	2.5	1.1
2.2	5.4	1	0.4	0.7	1.4
0.7	0.1	5.5	12.7	0.6	0.1
2	5	23.2	1.4	0.7	11.5
1.7	25.4	3.2	0.3	0.3	0.8
2.2	1.2	1.5	0.1	0.4	2.5
1	1.2	0.7	0.5	1.5	0.9
0.6	2	4.8	0.2	0.7	1.6
29.4	0.5	4.5	0.6	0.6	0.6
61.4	0.3	0.2	0.2	0.1	10
32.4	0.7	0.9	5.9	0.4	0.5
1	0.4	3.2	0.6	1	1.1
3.1	12.6	0.7	0.5	0.5	2.6
1.6	2.8	1.5	0.1	0.4	4.5
9.8	1.3	0.9	1.1	1	0.6
4.3	0.3	2.9	9.8	0.9	2.7
0.5	0.3	1.9	0.9	0.8	1
0.2	0.3	1.2	0.2	0.4	1.2
0.3	0.3	0.9	0.6	0.8	0.5
0.6	2.2	1.1	0.8	0.1	1.3
3.2	0.4	0.9	0.4	0.4	0.2
7.8	0.3	2.1	3.8	0.5	0.1
10.7	0.7	0.4	0.5	0.4	0.2
5.5	0.1	0.6	2.5	0.4	0.5
0.9	9.4	0.5	0.3	0.4	2.4
7.3	1.1	0.5	0.1	0.5	0.9
1.8	0.8	0.2	12	5.4	12.6
1.6	0.5	0.9	0.2	1	4.6
7	0.6	8	1.6	1.2	2
0.8	1.7	0.9	0.4	0.5	1.2
1.6	14.2	0.3	6.3	0.6	1.5
24	5.3	1.4	0.6	0.5	3.4
1.6	1.9	5	0.3	1.7	0.5
0.7	10.5	0.7	16.7	1.1	0.4
1	0.9	0.6	0.1	0.5	0.4
0.8	34.2	0.6	0.2	0.8	1.8
17.5	0.5	0.9	0.5	0.5	0.7
11.5	0.1	0.9	0.6	0.8	17.5
1.5	0.4	0.2	1.8	0.3	2.8
1.4	32.3	0.2	0.4	1.4	0.8
0.5	2.3	0.6	0.3	1.7	1.9
1.8	1.2	0.6	0.1	4.6	2
3.7	0.3	1.1	0.6	0.7	0.8
17.5	0.2	1.3	0.3	0.7	1.4
1.7	4.6	74.5	11.2	0.4	1.3
1.6	2	1.6	0.3	0.5	0.8
60.6	1.6	0.4	1.7	1.8	0.8
0.3	0.3	0.7	0.2	0.5	1
15.5	0.6	0.3	0.3	0.9	2.1
2.2	0.5	7.1	10.7	0.5	1.6
8	20.5	2	0.5	0.8	2
5.9	1.5	0.5	3.5	2.1	3
0.3	1.7	0.2	0.5	0.3	0.6
1.2	5	0.6	0.5	0.5	4.4
2.8	3.1	4.3	1.5	3.1	0.5
0.4	0.9	0.6	1.3	0.9	2.3
2.2	0.8	0.9	1	1.1	3.8
0.6	10.3	1.5	2.1	1.9	1.3
4.2	0.4	2.4	1.2	1.4	16.1
1.7	1	2.3	0.2	0.4	3.5
0.8	5.9	1	3.3	4.3	1.4
0.4	2.3	6.2	2.8	10.4	2.6
0.7	0.2	3.5	0.4	2.1	0.9
0.7	0.5	2.1	0.7	0.8	1.2
1.6	0.1	0.4	0.3	4	0.6
1	3.9	1.8	1.2	1.3	0.7
1	16	0.8	0.7	3	28.2
0.3	2.3	5.4	0.3	1.6	1.8
1.2	0.6	0.8	0.8	3.4	1.1
0.3	0.8	0.7	0.3	1.5	2
1.3	0.2	5.9	0.7	3.6	1.6
3.3	7.4	4.6	0.7	1.1	0.8
0.8	1.6	1	1	13.9	1.3
0.7	2	0.5	2.1	0.9	0.8
0.2	6.9	0.9	1.4	1.2	0.2
0.3	0.6	3.5	0.8	0.3	0.4
0.4	48.7	1.1	1.8	0.3	0.7
0.3	0.5	1.1	0.9	20.1	0.8
0.2	2.1	0.2	4.3	2.7	0.5
0.9	0.8	1.6	3.2	2.2	0.9
1	1.1	3.5	1.5	0.4	0.9
1.4	1.8	0.7	0.8	0.5	0.2
1.7	2.1	2.2	19.6	0.8	0.2
0.3	0.8	0.7	0.7	0.5	0.6
0.4	15	1.6	0.5	4.7	0.5
0.4	0.9	1.3	0.9	2.5	0.1
1.4	18	0.7	1.1	2.2	1.2
2.2	1.1	4.3	49.1	108.6	0.5
1.2	2.4	1	1.3	2	4.4
1.8	1.3	2	0.5	25.1	1
0.4	1.6	1.4	0.3	1.8	0.9
0.8	22.5	0.7	2.1	0.9	0.3
2.1	11.2	0.7	1.5	4.6	1.4
5.7	3.3	0.6	1.8	1.7	0.9
1	0.1	2	0.3	2.2	1.2
14.3	0.1	19.9	0.8	1	0.8
0.6	1.2	0.8	0.4	0.8	0.4
0.6	14.3	0.3	0.4	0.3	0.3
9.1	12.2	0.3	0.3	0.5	0.8
6.6	0.4	0.5	0.2	3.3	0.7
14.4	0.2	0.6	6	1.8	0.7
4.4	0.9	0.6	0.5	4.1	0.1
0.7	0.4	0.7	0.7	1.2	0.2
0.4	1.5	1.8	1.9	1.6	0.2
1.1	0.6	0.5	2.3	0.6	0.2
2.1	0.5	0.6	1.4	29	0.6
1.1	2.5	1.3	1.1	1.5	0.7
0.3	0.3	2	1.8	5.8	1.2
0.3	2.8	0.2	6	1.7	6.3
10	0.6	14.9	0.7	0.9	8.1
0.9	0.9	0.8	0.4	0.6	1.2
1.6	0.9	0.6	0.9	2.7	0.3
1	0.9	0.6	0.5	1.5	0.4
1.5	0.6	5.3	0.3	0.1	26
1.3	1.4	0.3	2.5	0.4	0.4
12.4	0.4	1.3	0.4	0.4	1.1
1.1	0.3	2.8	1.7	1.7	0.2
2.8	21.6	1.4	2.6	6.7	0.8
1.3	18.8	0.8	0.6	0.4	0.6
0.5	8.7	0.2	5.7	0.6	0.6
0.2	1.4	0.1	0.3	5.8	0.9
0.7	2.1	2.1	1	3.1	0.3
1.2	8.3	0.7	0.5	7.2	0.8
0.3	0.7	0.6	3.5	0.2	1.4
2	8.2	1	0.6	2.7	0.3
0.7	0.8	0.5	1.6	2.2	1.3
1.1	1.3	7.4	6.1	0.5	0.5
15.7	0.4	0.8	0.8	0.6	1.5
0.6	3.1	0.5	1.3	1.8	0.4
0.2	1.2	3.3	4.6	2.3	1.2
4.2	13.1	1.7	1.1	5.6	0.2
5	2.9	1.3	0.3	2.7	2
1.2	6.3	12.4	0.4	0.9	1.5
0.8	12.8	4.5	0.7	0.3	0.7
2.1	18.1	10.2	2	0.4	10.4
1.3	1.6	0.6	4	1.7	1.5
1.7	0.1	1.9	0.2	7.5	0.5
2.3	6.9	15.9	0.4	0.3	3.6
6.3	0.6	0.6	0.4	1.6	0.4
3.3	2	7.1	0.3	1	1.1
7.8	0.2	2.1	0.7	1.4	1.4
1.3	0.3	0.6	0.2	13.8	0.7
5.1	0.7	0.9	0.6	1.2	0.8
7.8	1.7	3.7	0.3	0.9	1.4
1.6	2.2	1.8	0.4	0.3	2.3
11.3	0.3	17.1	0.5	0.4	0.7
1.7	0.2	2	1.1	0.3	0.8
3.6	4.7	1.1	0.3	0.9	0.4
0.7	2	1	0.3	3.7	0.6
0.4	15.5	0.5	1	2.8	0.5
0.3	4.3	2.2	11.7	0.2	0.4
16	1.7	0.2	0.3	12.7	0.7
3.3	6.6	2.4	101.3	0.7	0.6
1.4	1.5	0.5	0.2	0.5	0.4
1.7	1.3	0.3	0.6	11.4	0.5
2.5	7.8	0.3	1.5	0.2	0.9
0.1	0.7	0.5	2	0.9	0.5
4.5	4.8	1.7	2.8	2.6	84.3
0.9	2.3	0.4	0.5	9.5	0.4
0.7	0.4	0.5	2.2	1.8	0.5
8.4	4.4	1	1.7	0.2	0.6
1.2	6.8	0.5	0.9	0.3	0.5
2.1	0.7	0.5	0.3	0.4	0.7
2.8	2.4	0.8	0.1	0.2	0.5
1.7	2.2	0.8	0.4	0.2	1.1
2.7	51.2	0.5	1	9.9	2.4
0.5	1.8	0.1	1.1	2.1	0.7
0.5	0.5	3.4	1.3	5.8	0.7
21.5	0.4	2	1.7	0.6	0.5
1.1	0.7	1.1	1.7	1.5	9.2
3.5	0.8	2.3	0.6	1.1	0.6
0.5	12.8	1.4	0.2	7.7	0.7
1.9	0.8	0.1	0.2	10.3	0.7
0.4	0.9	0.3	1.3	13.9	0.3
0.6	33.6	30.2	0.4	0.3	0.5
1.3	3.7	1.2	1.1	2.7	5.5
0.5	6.6	1.5	0.4	0.4	0.5
0.7	0.5	1.8	0.4	1.8	14.8
3.6	0.9	0.2	1.2	1.7	0.5
1.1	8.5	0.9	1.6	0.5	0.3
8.9	2.5	1.2	1.2	12.9	0.3
3.6	0.3	0.2	1.3	7.8	0.8
37.9	0.6	0.4	4.3	8.9	33.2
0.7	7.2	2.1	1.2	0.6	0.7
9.6	3.8	4	14.2	0.8	2.2
1.7	1.3	0.4	2.1	4.7	0.8
39.7	0.3	2.6	3.2	1.5	0.6
1.8	12.1	2.7	0.2	0.4	2.2
1.1	4.4	1.5	0.5	7.2	3.2
0.7	0.3	0.2	1.3	1.6	8.6
4	0.1	1.7	0.1	4.7	6
2.7	83.3	5.5	0.4	0.1	1.9
5.4	1.3	1.6	0.5	0.4	3.6
1.5	0.3	0.3	16.2	0.4	3.5
0.7	23.4	3.2	0.1	0.9	0.5
7	3.2	0.5	0.2	1.1	0.3
3.4	1.3	1.1	9.8	0.9	1.2
3.5	36	0.9	6.6	8.2	0.2
2.8	4.5	1.7	1.1	0.2	0.5
0.9	0.9	3	0.2	13.1	0.5
1.4	0.7	1.6	20.2	0.4	0.9
22.1	0.1	0.3	0.7	3.9	0.9
1.4	0.2	1.6	9.4	0.5	0.6
20.6	0.2	0.1	1	0.2	2.1
1	0.3	14.6	2	0.3	0.7
0.6	0.3	0.9	11.1	1	0.3
1.8	0.3	0.1	0.9	1.9	4.2
1	0.6	0.9	0.6	10.5	9.7
3.8	0.3	0.7	0.7	1.4	0.3
1.8	0.5	0.4	6.6	0.8	2.2
2.7	1.5	0.9	0.1	0.7	0.6
8	2.2	1.1	1.3	3.5	1.6
1.5	0.3	0.2	0.2	5.5	1.2
1.5	12.7	9.9	1	0.4	1.7
2.8	10.7	5.7	0.3	0.5	0.3
1.8	0.8	0.5	1.8	0.5	1
1.9	0.4	0.2	0.4	1.2	1.4
1.4	7.9	0.5	4.7	0.7	0.2
0.6	1.8	1.2	1.8	0.1	3.4
3.4	5.3	4.6	0.7	0.4	0.6
0.9	0.5	4.5	0.1	1	0.5
3.3	0.7	10.6	0.3	0.4	3
0.3	5.7	1.7	0.8	0.5	1
6.7	0.8	6.5	0.1	1.3	0.2
7	1.7	7.7	1.4	0.8	0.5
3.5	0.2	9.3	0.1	0.8	0.4
5.4	1.7	0.6	0.5	0.2	83.6
2.8	0.2	3.2	2.1	0.3	0.7
6.8	0.6	0.7	2.2	3.7	1.5
9.3	1.4	0.4	0.1	12.6	1.1
0.7	1.1	0.5	0.4	1.1	0.6
2.9	0.5	3.7	1.1	0.4	2.1
6.9	0.8	0.6	0.6	2	2.8
3.9	4	2.4	0.6	5.8	0.8
0.8	3.7	0.3	0.3	2.7	1.1
0.6	1.5	0.1	0.4	1.3	1
0.4	0.9	1.6	0.6	1.3	1
1	21.1	1.6	0.5	11.4	0.6
2.9	15	0.3	0.3	3.9	0.7
0.7	1.7	15.3	0.5	1.6	0.6
0.4	2.9	0.9	0.5	2	0.8
0.5	1.2	3.9	0.4	4.2	0.8
0.3	6.2	15.5	1.6	7.3	0.1
0.6	0.5	0.1	0.4	17.5	0.2
1.4	63.6	1.1	0.6	1.5	0.8
1.4	14.1	1.3	0.7	5.4	0.3
0.3	0.6	0.2	0.6	2.7	0.3
1.2	9.2	0.1	2.9	1.6	1.9
0.4	7.8	0.8	17.6	0.4	0.2
0.8	0.6	2.6	0.4	1.4	0.3
1.6	1.1	0.1	0.4	8.1	0.2
0.4	0.4	1.8	0.5	1.9	0.8
0.5	2.6	8.8	0.4	0.2	0.4
3.1	0.2	3.7	0.7	0.8	0.4
3.4	0.9	1.1	0.3	1.1	0.5
0.4	0.2	0.1	0.4	2.6	0.4
1.3	3	0.6	0.4	0.5	0.4
37	2.5	2.4	0.3	0.6	0.7
0.6	9.6	0.2	0.1	0.7	0.6
1.3	8.1	0.5	0.2	0.8	5.8
1.3	5.9	4.1	1	0.7	0.6
1.2	1.5	1.1	0.4	0.8	0.9
1.1	9.7	1.5	0.8	0.4	0.4
1.4	2.4	0.2	0.2	0.7	1.5
1.6	0.2	0.3	0.3	0.8	0.9
1.5	1.9	0.4	0.3	1.1	0.1
0.1	0.4	0.7	0.4	1.1	1
2	0.8	0.3	1.7	1.2	4.2
0.4	1.1	0.2	0.3	0.6	8
3	1.1	12.9	0.6	0.7	5.3
5.8	0.7	0.2	0.4	0.7	1.4
1.5	13.7	0.7	0.3	0.6	0.8
0.9	4.6	0.1	0.5	0.7	15.4
8.9	0.5	0.4	15.8	0.3	0.4
0.4	0.8	0.4	0.9	0.5	0.4
2.5	1.1	0.4	1.2	0.6	0.5
1.7	0.5	12.2	0.9	1.4	1.1
1	2.7	0.1	0.4	2.7	0.5
2.1	5.5	3.8	0.4	4	0.6
0.5	0.2	3.8	0.8	5	0.5
0.8	0.3	2.4	0.4	0.2	0.7
4.2	0.4	3.5	0.7	11.7	0.4
1.4	10	0.2	0.8	10.6	2.6
1.3	0.8	7.7	0.2	0.2	1.1
5.6	2.4	1.3	1.3	0.6	0.7
2.3	0.2	5	0.4	1.1	33.9
0.9	0.4	0.5	0.3	12.6	0.4
0.8	0.3	0.1	0.7	1.5	1.4
2.7	0.2	0.4	1.2	0.6	4.1
0.9	4.4	0.2	0.9	0.2	0.4
2.1	54.8	0.6	0.1	0.3	0.9
1.1	14.7	0.2	2.6	0.5	20
0.9	0.7	0.6	0.4	0.7	0.5
0.4	3.4	0.4	0.5	0.8	1
1	14.1	1	0.8	1.4	0.5
0.8	0.9	0.2	1.3	0.4	1.4
2.6	1.1	12.9	13.8	0.2	0.7
2.4	6.1	0.6	0.1	0.1	1
2.4	7.4	2.7	0.2	2.6	0.5
1.2	4.5	0.5	0.4	0.6	0.4
0.4	8.8	1	10.9	1.4	0.6
1.3	63.7	4.6	1.8	0.3	2
0.9	0.8	1.5	0.3	0.3	0.2
6.9	0.5	0.4	0.5	4.7	0.5
1.1	1.1	5.8	0.8	0.4	0.9
5.4	0.8	0.4	0.5	4.4	0.6
1.8	3.3	1.2	0.4	0.2	2
1.5	0.7	0.8	1	1.1	1.4
7	0.2	0.2	0.5	1.8	0.4
4.3	1.1	0.2	0.4	1.5	1.9
1.1	0.3	0.3	6.7	3.3	2.9
8.1	2.5	0.4	0.4	0.9	1.4
9.1	0	0.6	0.4	0.7	0.4
0.6	0.7	0.3	1.1	0.7	0.1
0.8	11.9	0.3	0.3		0.4
11.4	2	5.8	8.1		0.6
0.2	1.8	2.1	0.4		0.3
0.5	0.7	8.5	8.8		2.3
0.8	15.3	0.6	0.2		0.2
3.1	1.3	0.5	8.2		1.4
0.9	0.8	0.6	0.8		0.2
0.5	1	0.5	0.4		1.6
1.9	1.7	0.4	0.4		0.4
1.4	0.2	2.2	1.1		0.2
0.3	1.3	1.1	9		0.5
12.4	0.3	2.4	0.6		0.9
0.3	3.3	0.4	0.6		8.5
0.2	2.3	0.2	0.6		1.8
9	0.2	12.4	0.9		4.1
1.5	2.1	3.5	3.3		0.6
1	0.7	0.9	1.4		0.3
0.3	3.4	2.6	3.3		0.8
3	0.5	2.1	0.2		3.2
0.4	0.5	0.3	1.1		0.7
3.3	0.2	0.2	0.5		0.3
1.7	0.3	0.5	75.1		0.6
0.7	1.2	3.6	8.8		1.6
7.9	0.5	0.5	0.2		1.1
0.8	2	6.8	2.6		0.7
1.8	0.8	13.8	0.8		0.7
1.1	0.6	1.1	1		0.3
0.2	0.4	0.5	0.8		0.6
1.5	1.6	0.7	0.5		0.2
0.4	0.6	0.2	32.7		0.3
5.9	0.3	2	0.2		2.3
3.9	0.4	10.1	0.5		0.3
0.4	0.8	0.7	0.4		3.5
0.4	0.5	3.2	0.9		1.4
0.7	1.2	2.3	0.3		0.5
0.7	1	2.3	0.3		0.2
2.2	0.4	0.3	0.2		0.7
4.7	4.2	0.6	2.5		0.9
1.8	3.9	0.3	0.5		1
4.3	0.4	2.8	4.4		0.2
2.5	0.7	1.3	1.1		0.7
0.8	0.3	0.1	0.5		0.8
13	0.3	1.6	0.3		3.7
0.2	0.7	0.3	0.1		1.9
23.2	0.1	0.8	0.5		0.4
2.7	0.6	0.9	0.4		0.2
2.5	1.7	0.3	1.2		0.9
1.5	0.6	6.9	0.4		1.9
0.4	1.2	1.5	0.7		0.6
0.4	0.8	1.2	20.1		0.4
0.8	0.3	0.3	0.9		0.3
3.1	0.3	1.8	1.2		3
0.6	1	1.6	1.6		29.6
0.6	1.3	3.4	0.7		1.2
1.5	0.6	0.5	1		1
0.7	0.3	6.3	0.2		0.6
0.5	0.7	0.8	0.7		1.2
0.5	2.1	2.9	1		1.1
0.7	28	1.7	0.1		3.2
0.4	0.8	3.2	0.3		0.4
0.7	0.9	0.4	3		7.4
0.2	2.2	0.2	14.5		0.6
0.6	0.4	6.5	1.4		2.5
1.1	0.6	6.8	1.4		0.3
0.8	0.3	1.2	3.3		0.6
0.3	0.5	21.9	0.6		0.7
0.4	2.6	0.2	0.1		0.6
0.6	0.4	1.2	0.2		14.2
1.2	0.5	1.6	0.6		0.8
1.2	2.8	28.3	0.6		44.6
0.9	1.2	1.8	0.1		1.7
1.4	9	0.1	0.6		0.9
0.5	2.3	0.6	13.2		0.7
0.3	1.8	3.4	0.9		1.2
0.9	0.5	0.7	2.7		0.2
0.2	1	25.6	0.9		0.9
0.5	1.2	4.9	2.3		1.1
4.3	2.1	20.1	0.6		5.8
0.5	0.4	8.3	0.6		0.4
1.3	0.2	5.1	0.7		0.5
0.5	1.2	2.5	0.6		0.2
0.2	0.2	4.8	0.3		0.6
0.8	4.8	1.7	1.2		0.2
0.4	0.2	0.2	0.8		0.9
0.7	0.1	1.2	1.8		0.9
1	0.5	1.5	0.5		1.7
0.6	0.8	1.2	0.2		0.7
3.7	0.5	0.8	0.3		1.9
2.3	0.3	1.3	0.5		0.4
0.3	0.5	26.4	0.5		2.1
1.1	0.3	10.3	0.6		1
0.1	0.9	2.7	5.2		0.2
0.6	0.7	2.7	0.3		0.6
0.2	1.8	4.5	0.5		0.4
0.3	0.5	0.8	4.6		7.3
0.4	0.7	0.2	1.2		8.4
7.1	2.3	0.2	3.5		0.4
9.8	1	0.7	0.7		0.5
58.5	1.8	2.3	0.2		0.5
8.1	1.7	10.6	0.3		1.3
5.1	0.3	3.9	1.6		1.1
109.4	0.4	1.6	0.5		0.7
3.3	40.1	0.8	2		0.5
1.7	1.5	6.4	23.9		2.1
3.4	0.4	7.7	0.5		1.1
5.1	1.9	5.9	0.4		0.4
0.2	0.1	2.6	0.2		2
0.9	0.5	0.4	0.5		0.9
2.3	0.3	0.9	0.2		1.1
0.3	1.8	1.5	0.7		3.2
2.6	1.1	5.1	0.3		1
0.3	1.3	0.7	0.4		0.5
1	0.5	0.5	1.6		8.8
0.4	0.1	1.4	3		5.6
12.3	0.3	1.8	1.1		1.5
0.1	0.9	0.2	1		1.3
0.2	1.8	14	0.6		1.1
1	0.5	0.3	0.7		1.3
1.2	0.2	0.6	3		0.4
1.5	1.8	2.1	0.2		11.6
1.7	0.9	0.6	2.8		0.3
2	1.1	7.8	0.6		1.5
1.2	0.2	0.4	0.5		0.6
0.9	0.3	3.7	1.4		0.8
0.5	0.4	1.5	1.2		2.4
0.8	0.7	4.7	18.9		7.4
0.5	1.4	0.9	0.6		1.3
5.8	0.2	0.7	0.1		0.4
0.8	0.4	4.8	3.1		6.7
10.7	0.3	1.6	0.6		1.2
0.3	0.2	2.4	1.3		0.6
2.5	0.7	1.6	0.6		1.4
0.2	0.5	2	1.2		0.5
3.7	0.8	0.2	3.8		0.4
2.5	0.5	0.3	0.3		1.1
1.3	0.4	0.2	1.1		0.4
1	0.6	3.4	0.1		3.3
0.2	0.9	3.6	5		29.9
0.3	0.3	1.8	1.1		0.8
2.8	1.2	1.6	0.9		1.3
1.8	0.8	0.5	0.6		0.2
0.8	0.8	0.3	6.6		0.6
0.2	0.9	0.8	1.4		0.9
4.6	4.5	0.5	2.5		1.3
19.8	1.4	3.3	0.5		1.9
13.2	0.4	0.4	1.3		1.8
27.4	0.6	0.7	0.6		1.1
11.7	0.7	1.2	1.8		0.3
16.2	0.3	8.5	0.4		0.5
2.5	0.2	0.5	3.9		6
3.2	0.3	0.1	8.8		0.5
5.5	0.6	17.9			0.4
0.4	1	0.3			2.9
1.1	2.3	1.3			1.4
0.8	1.2	1.2			9
6.3	0.7	0.1			0.2
0.7	9.3	0.3			7.6
3.6	0.2	0.8			9.5
0.9	1.1	0.6			0.7
0.5	1.9	1.4			0.5
0.3	0.3	1.1			0.1
2.3	7.3	0.2			4.7
3.4	0.1	1.1			0.3
0.5	0.8	0.7			0.8
4.9	1.3	0.2			2.3
13.2	0.6	3.3			0.5
0.1	1.8	0.3			0.5
0.3	0.4	2.6			1.8
0.5	0.2	2.1			0.3
0.5	0.7	2.6			2
0.9	0.7	0.5			1.2
1.4	0.6	0.3			0.1
2.6	5.3	0.1			0.5
1.4	3.8	0.4			0.6
0.6	0.7	0.4			13.2
1.4	1.7	2.3			1.1
2.3	1.1	0.1			1.4
3.3	0.5	1.1			1.8
1	0.8	0.4			1.6
0.8	2.1	0.1			11.1
1.1	0.1	2			0.8
0.8	7.4	2			0.9
0.4	21.9	0.3			1.1
0.6	12	1.7			1
0.8	1.1	0.2			2.2
0.2	19.3	11.8			2.2
0.3	2.1	0.7			0.7
0.7	0.2	2			0.8
0.9	0.4	0.7			0.5
0.6	0.2	0.1			1.2
0.5	1.2	0.5			1.2
0.7	0.2	0.5			0.1
8.4	4.8	0.2			1.8
8	9.3	0.3			1.7
1	0.7	0.3			1.2
0.5	1.7	0.7			0.9
2.3	0.8				1.6
4.4	5.1				4.7
0.5	1.1				2.2
0.4	0.5				1.5
0.9	0.3				0.9
1.8	1.9				21.5
3.1	0.7				31.6
1.6	10.6				2.1
1.6	5.5				1.8
0.2	1.1				4
0.9	0.2				0.7
0.3	0.6				1.5
2.8	0.1				11.6
1.3	0.7				0.4
0.6	0.2				0.1
0.2	0.3				0.2
0.6	1.1				3.5
1.9	0.7				0.6
2	0.1				0.5
2.6	0.8				0.9
0.5	0.6				1.5
0.9	0.8				1.8
3.9	0.1				0.4
3.7	0.7				1.1
0.2	0.3				2.4
1.1	0.5				0.7
0.1	0.3				0.3
0.2	3.5				1
1	0.9				1.7
0.1	0.6				1.1
1.3	0.4				0.8
0.3	2.1				0.5
9	0.5				2.5
0.3	0.4				0.6
0.5	4.9				0.6
13.9	0.4				9.1
0.1	0.3				0.4
0.2	0.4				1.1
7.5	2				0.7
10.6	4.7				0.1
29	0.4				1.2
7.6	0.5				1.1
55.3	1.4				1.6
1.1	0.6				0.5
0.4	1.2				0.2
8.6	0.7				0.1
0.4	6.6				0.6
0.5	0.3				0.7
1	1.2				0.8
0.8	3.4				0.8
0.5	1.7				0.3
1.5	6				2.9
0.1	21.4				23.1
0.9	20.9				0.4
0.4	0.4				9.2
0.4	1.4				2.4
0.1	0.2				2.2
3.2	0.1				0.5
0.6	6.2				0.5
2	0.1				0.4
2	0.4				0.3
4.8	1.5				11.7
1.1	1.5				0.4
0.2	2.7				0.6
8.3	1.1				0.3
10.7	4				1
0.5	1.6				0.9
0.3	0.6				0.2
0.8	0.9				0.4
5.3	35.5				1.1
3.7	3.5				0.8
1.3	0.3				23.3
0.5	0.8				2
0.6	11.8				8.8
0.7	4.9				0.8
1.8	0.4				1.2
12.1	49.4
20.6	1
18.4	0.2
0.5	2
2.7	0.2
0.2	7.8
0.2	0.3
4.2	0.1
8.3	2.2
0.5	0.1
2.5	0.4
0.2	0.6
0.3	80.4
0.4	10.6
0.6	0.2
0.3	13.1
0.5	0.4
0.5	2.1
0.1	1.1
0.2	0.2
0.5	6.5
0.6	1.8
5.6	49.7
0.2	0.9
4.6	2.5
2.2	0.4
2	1.2
1.6	0.8
5.5	0.5
0.8	7.6
17.8	37.5
0.2
12.3
0.7
0.2
1.9
0.1
0.3
0.3
0.9
0.5
0.6
1.2
1.5
0.5
0.6
0.1
0.2
0.3
3.9
0.8
0.4
0.2
2.4
15
26
2.3
1
1.1
0.5
0.3
0.5
0.2
3.3
1.1
1.7
0.8
1.2
7
0.4
0.5
1.9
6.3
2.4
0.4
1.8
0.1
0.6
5.9
0.3
0.1
0.6
0.9
2.7
0.3
1.5
1.4
1.4
0.4
98.7
0.7
0.7
0.8
1.7
0.3
1.4
4.5
0.1
4.4
0.4
1.1
3.4
5.1
11.6
14.8
3.7
0.1
0.5
0.4
1.2
0.4
6.4
2.2
1.2
0.3
0.5
0.1
24.7
11.5
3.8
0.5
0.9
4.2
1.5
0.8
0.3
0.4
6.1
3.9
1
1
7
0.2
23.3
0.5
1.2
0.4
0.5
0.1
2.1
2
0.2
105.6
0.2
6.4
0.3
1.7
2.9
1.6
0.3
0.7
0.1
0.3
4.8
0.6
1
4.1
3.9
1.7
0.5
0.3
1.1
1.8
0.6
2.5
2.6
2.3
2.9
2.5
1.3
1.3
1.9
7.4
2.3
7.3
6.2
0.5
5.5
0.1
0.3
4.3
1.3
3
7.6
44.8
9.5
42.4
0.8
0.3
0.4
0.3
0.3
5.8
0.9
0.7
0.1
19.8
1
0.3
27.3
1.8
3.4
3.9
0.6
1
1
11.9
4
0.4
28.6
29.1
2.8
0.4
0.3
5.2
1.9
4.6
0.2
0.7
0.6
0.6
0.7
0.4
0.4
0.5
0.5
1.2
0.1
1.1
0.3
0.4
1.2
0.3
0.2
0.2
2
0.3
0.1
0.3
0.2
29.5
1.1
1.3
1.1
0.7
0.3
4.5
0.5
1.1
0.2
1.5
0.7
0.3
0.3
4.1
0.2
3.1
5
1.2
0.3
0.2
0.2
0.4
10.9
0.7
8.1
1
0.2
0.4
0.4
0.8
1.6
1.9
3.4
1.5
1
0.2
8.3
2.1
1
1.4
1.3
0.5
4.6
0.5
0.4
0.1
0.3
0.7
1.1
3.7
0.7
0.4
0.3
13.9
6.1
16.3
1.5
0.9
0.4
1.4
1
0.5
4.1
0.7
1.8
0.4
0.3
0.7
4.9
0.5
0.7
0.3
2.3
14.4
0.6
0.6
0.8
0.9
3.5
0.7
6.5
6.5
3.8
0.4
0.2
0.2
0.4
1.3
1.1
8.2
2.4
0.6
0.6
0.1
0.3
3
3.2
0.7
1
0.4
0.5
0.5
3.2
0.4
1.6
0.2
0.3
0.2
1
0.3
0.6
0.5
0.2
3
2.8
0.7
0.4
0.5
0.7
0.3
14.9
0.3
0.3
0.3
0.2
0.3
38
0.5
0.2
0.9
1.1
0.9
0.8
4.7
7
6.7
0.3
1.2
0.4
0.1
0.1
0.1
0.2
17.6
0.9
0.5
0.8
1.3
0.9
0.2
0.4
0.9
1
9.8
4
0.9
1.4
0.1
0.4
20.4
3.7
14.7
13.2
0.3
0.8
1.9
1
0.2
0.8
2.8
1.1
0.3
10.7
0.3
2.5
3.6
1.1
0.6
2.2
0.1
5
0.6
0.5
0.2
0.8
0.8
0.2
4.3
1.1
8.1
1.2
1.4
0.3
6.3
0.4
3.9
0.3
0.6
0.4
3.9
0.1
0.7
0.3
1.8
7.8
1.8
1.2
0.3
0.6
0.4
0.2
0.9
1.7
0.6
1.2
0.4
24
1.1
1.2
0.2
0.9
0.6
0.2
0.2
4.9
7.2
0.6
0.1
1
0.6
0.7
1.5
1.3
1.1
0.2
15.6
0.1
0.3
1.5
0.1
0.7
0.4
0.4
0.6
0.3
0.7
0.3
0.3
0.2
0.8
0.9
1.5
0.1
0.1
38.5
0.8
0.1
0.3
4.7
8.2
0.3
1.4
4.3
1.2
0.6
0.1
0.2
0.6
0.7
0.4
10.2
3.5
0.5
0.7
0.5
1.1
89.7
44.6
79.3
