# Supplementary material for: The Ndc80 complex bridges two Dam1 complex rings
Source: eLife. 2017 Feb 13;6:e21069. doi: 10.7554/eLife.21069 (PMC5354518; doi:10.7554/eLife.21069)
Supplement: Figure 3—figure supplement 2—source data 1. — DOI: http://dx.doi.org/10.7554/eLife.21069.019 [file elife-21069-fig3-figsupp2-data1.xlsx]

## Sheet: Figure 3 - figure supplement 2C
Table of Dam1 complex inter-ring distance measurements (nm) in Figure 3 - figure supplement 2C
Ndc80 mut A	Ndc80 mut B	Ndc80 mut C
247.392	73.651	249.272
391.173	46.567	222.754
35.948	31.453	265.182
13.243	82.24	107.898
89.239	230.506	181.261
34.525	105.278	127.244
18.012	49.698	188.281
22.549	79.01	271.546
60.799	17.244	384.188
14.256	16.714	116.331
107.156	94.18	147.586
95.262	23.585	184.847
17.838	140.623	160.558
13.315	15.175	541.699
94.605	42.175	512.857
41.97	16.875	334.079
13.898	96.98	173.833
46.234	89.845	214.542
15.211	42.249	227.857
47.551	193.684	14.59
70.148	29.423	395.231
52.146	64.179	41.684
21.75	63.373	11.113
96.088	46.119	276.238
12.738	193.684	71.947
8.357	30.401	68.713
39.953	63.548	13.36
43.234	64.152	64.194
15.561	75.095	657.586
30.189	48.309	97.003
36.442	177.533	42.633
53.754	17.745	38.755
126.23	53.732	347.589
124.021	363.032	14.352
45.07	297.042	52.447
27.123	13.262	14.557
39.41	533.027	15.125
164.132	152.932	490.79
64.24	62.504	62.936
74.159	594.77	324.004
74.727	417.522	45.379
87.612	18.353	179.769
16.279	13.952	14.192
110.62	458.042	648.665
32.515	18.439	438.249
104.46	503.38	13.948
47.4	340.362	476.157
16.218	11.82	489.029
85.381	34.438	176.279
14.921	114.554	88.933
163.991	55.371	14.473
159.124	69.682	15.402
140.605	80.517	287.379
15.324	16.449	154.009
13.16	99.619	32.693
96.899	10.608	74.213
20.287	82.902	87.935
126.773	179.926	63.115
13.072	82.663	133.416
94.581	14.615	137.351
232.454	239.57	29.916
27.289	15.145	96.797
75.109	23.96	38.011
122.546	136.049	33.762
130.769	107.971	27.523
16.524	255.386	42.343
198.242	84.568	240.709
78.923	85.228	72.903
57.246	13.923	29.921
195.588	110.467	139.743
16.5	212.405	103.787
177.542	214.402	65.25
28.655	106.481	60.636
235.921	56.338	17.434
11.063	35.368	13.464
10.607	71.085	123.824
192.381	194.517	43.324
66.671	53.183	77.377
207.266	183.118	34.231
17.826	9.936	179.796
39.51	16.736	66.071
123.752	102.628	124.78
11.112	218.419	34.323
110.944	137.77	68.024
300.197	39.708	45.694
39.873	30.656	42.602
124.988	58.082	13.008
88.519	14.92	52.332
124.96	92.881	24.163
13.75	118.709	40.96
139.667	90.354	28.375
118.23	53.036	148.128
42.253	144.224	11.982
457.83	18.494	60.356
10.217	14.143	70.141
542.557	35.362	19.994
131.885	12.67	176.482
381.276	352.719	20.885
318.175	16.898	52.715
13.243	108.947	53.832
85.272	20.04	114.517
292.935	36.536	165.946
333.939	128.769	39.836
167.182	137.553	123.008
115.755	23.013	52.338
256.585	35.436	76.97
11.661	47.765	9.958
156.162	72.505	108.953
174.956	67.97	18.825
66.213	20.435	13.015
136.996	10.026	151.468
47.839	480.987	30.882
12.493	89.732	35.535
71.373	9.171	53.183
42.619	106.413	74.608
117.05	101.951	13.971
23.206	154.479	77.233
37.134	13.934	62.07
15.222	36.477	92.604
159.742	279.363	220.597
38.671	13.127	17.08
16.772	53.129	145.463
40.528	41.965	75.595
12.423	193.763	51.093
27.469	169.21	62.278
13.021	15.44	76.039
100.444	116.466	72.203
29.819	16.055	46.065
37.104	170.611	122.035
30.421	27.016	82.567
14.797	11.684	52.22
106.405	14.382	40.884
125.458	72.515	16.442
22.842	300.459	107.936
79.214	70.238	43.413
34.211	203.951	15.497
15.621	61.493	59.604
107.258	117.102	16.12
12.958	36.024	129.495
24.122	80.698	22.992
28.09	65.053	149.792
15.919	237.689	15.667
84.424	72.701	52.755
14.45	44.358	60.303
109.546	211.173	112.603
12.423	192.577	42.303
47.463	118.54	16.195
92.813	71.637	14.493
13.923	31.588	132.804
14.779	156.228	292.232
77.366	109.588	50.504
61.31	11.929	248.877
56.159	8.015	35.485
22.776	271.343	41.846
36.709	40.49	269.693
84.845	164.844	41.234
30.575	48.268	170.792
91.939	54.419	76.148
92.699	37.83	40.859
13.605	126.369	71.216
146.59	35.161	71.381
13.817	191.71	26.832
24.828	191.963	71.928
16.775	90.376	17.286
267.35	11.373	291.009
32.998	57.818	16.946
102.263	113.904	37.213
221.592	93.363	71.661
16.836	82.079	33.286
26.975	16.9	78.615
13.574	37.161	43.105
183.534	52.458	317.483
28.792	182.879	61.458
138.76	82.375	164.346
20.955	15.247	121.846
217.271	134.664	193.696
126.514	68.109	118.912
134.431	20.508	51.811
14.253	267.558	78.67
103.02	13.817	35.44
176.423	54.666	32.907
30.521	41.939	258.738
13.634	143.932	30.897
537.547	139.962	69.336
39.232	38.372	227.311
146.748	194.05	35.797
60.655	119.765	109.832
95.969	12.578	30.512
14.796	88.071	74.792
221.437	270.44	229.326
13.393	5.966	30.734
8.652	478.479	109.158
177.262	66.765	169.655
16.204	56.591	59.67
99.369	10.346	55.394
147.038	552.151	26.314
16.595	426.726	90.548
117.941	331.789	131.899
33.694	163.243	143.56
103.67	379.317	240.86
96.342	179.727	138.823
414.289	465.836	41.929
16.503	351.732	54.554
21.218	260.934	46.638
109.039	36.218	20.277
22.688	128.709	125.569
189.164	446.749	65.769
175.62	32.428	198.886
23.797	64.745	59.821
28.537	12.683	14.806
80.56	17.652	169.21
15.832	261.206	200.812
15.979	81.52	46.849
94.324	12.563	62.778
17.153	201.722	13.89
165.892	38.008	213.915
150.869	17.003	43.967
149.092	285.138	77.892
148.635	13.279	79.853
111.214	22.006	37.606
53.823	132.848	129.161
48.362	11.775	81.572
202.856	42.295	29.423
93.259	104.057	28.506
83.142	11.775	49.108
95.865	60.235	14.96
97.298	51.17	70.703
17.532	305.011	54.131
269.777	26.95	80.152
72.339	183.87	112.499
76.265	21.493	167.932
160.289	13.177	51.255
47.147	207.893	12.905
77.043	155.477	48.824
222.029	52.477	57.122
84.697	198.597	53.674
288.491	30.302	22.735
97.426	40.714	111.205
39.934	49.072	20.756
154.712	156.659	10.642
314.708	129.203	45.289
121.006	115.173	196.22
152.822	13.083	11.758
9.429	49.824	170.011
12.782	80.654	60.96
45.819	107.143	108.796
74.84	23.977	16.079
174.551	49.329	39.257
159.241	30.762	102.335
294.054	431.254	84.079
19.874	334.499	45.159
38.893	164.882	532.95
51.169	8.812	220.243
233.87	450.308	318.066
143.943	349.759	15.833
12.535	263.066	199.554
160.894	35.846	54.687
21.527	85.317	418.118
62.45	331.44	27.825
29.919	44.881	86.581
125.648	36.901	476.84
15.898	747.723	42.846
151.188	17.136	131.478
15.483	335.722	549.707
9.384	307.473	14.675
160.95	24.917	41.557
45.384	77.336	207.279
67.477	57.551	39.384
28.2	17.16	119.674
21.875	17.444	18.077
107.261	88.769	157.262
47.177	180.244	70.911
31.893	16.762	17.689
48.404	53.769	104.198
16.076	50.34	73.423
24.026	131.813	122.45
34.285	19.537	15.002
99.624	257.487	67.339
39.769	75.008	76.246
46.678	17.622	52.211
12.914	135.353	15.328
20.294	13.605	130.587
27.819	88.975	58.328
78.7	65.969	96.911
17.394	80.152	18.457
184.478	343.828	57.52
12.33	60.13	13.702
41.297	43.551	16.05
9.446	32.799	531.283
183.967	281.033	44.28
65.101	15.381	35.589
80.209	190.616	68.475
15.367	29.176	48.196
40.727	153.329	39.311
46.263	113.127	67.378
13.836	19.809	11.973
21.877	69.937	33.937
32.31	33.816	8.439
80.423	117.965	102.738
17	12.185	66.467
186.237	28.024	11.875
18.326	18.107	133.453
9.663	180.139	62.346
34.788	89.429	14.085
185.592	31.49	134.57
65.155	219.863	122.266
72.168	57.754	66.213
25.281	45.287	78.16
39.054	366.323	20.376
103.41	111.73	69.696
222.495	16.022	112.951
14.192	180.483	27.407
26.225	13.583	144.238
16.184	13.785	106.977
186.946	155.852	13.174
36.162	42.226	39.08
23.209	191.888	132.757
118.79	141.458	87.605
25.155	269.845	88.903
210.534	91.662	59.379
125.893	124.384	11.154
139.572	63.79	89.714
17.357	58.506	106.106
102.009	16.449	124.948
105.028	62.608	32.253
72.772	15.882	45.194
16.888	384.671	145.087
236.336	14.029	12.609
176.223	41.305	290.789
19.864	13.196	59.285
11.827	107.971	76.719
89.429	184.373	13.861
98.937	160.714	27.722
128.171	9.046	132.297
136.172	9.508	24.603
163.144	203.951	25.045
236.793	78.387	253.895
172.377	73.679	20.203
11.205	86.736	75.793
167.951	141.347	34.663
12.192	41.415	110.657
192.29	45.562	224.684
13.53	116.271	93.035
119.547	6.95	138.451
15.708	33.363	70.632
193.084	46.788	48.741
254.483	259.445	31.615
135.364	203.164	135.441
14.007	38.981	15.834
10.746	16.512	109.461
36.754	501.315	93.667
124.055	24.446	59.959
46.097	57.745	180.12
174.653	97.43	12.711
40.353	105.179	36.892
213.476	84.131	418.286
12.806	15.088	25.949
51.392	18.561	193.863
8.699	158.733	53.363
174.47	15.093	81.679
147.857	119.406	17.057
419.346	225.299	42.283
54.474	64.534	142.788
88.465	101.287	17.223
122.064	81.601	72.229
10.411		54.743
141.843		16.15
13.564		198.146
112.661		36.671
296.061		64.272
33.622		82.783
123.887		18.89
		140.574
		28.515
		119.679
		117.097
		23.551
		46.049
		33.18
		14.192
		143.142
		17.223
		279.347
		15.954
		91.084
		172.09
		626.481
		13.002
		44.744
		94.993
		32.061
		84.67
		15.053
		100.552
		40.653
		195.655
		10.875
		15.922
		709.869
