# Supplementary material for: The Ndc80 complex bridges two Dam1 complex rings
Source: eLife. 2017 Feb 13;6:e21069. doi: 10.7554/eLife.21069 (PMC5354518; doi:10.7554/eLife.21069)
Supplement: Figure 3—source data 1. — DOI: http://dx.doi.org/10.7554/eLife.21069.016 [file elife-21069-fig3-data1.xlsx]

## Sheet: Figure 3C
Table of Dam1 complex inter-ring distance measurements (nm) in Figure 3C
no Ndc80	wt Ndc80	Ndc80-10heptad
82.332	35.77	60.456
17.922	307.669	643.675
176.837	31.195	241.056
170.004	126.23	232.646
182.16	30.746	42.431
257.785	145.698	356.736
68.231	428.884	24.557
14.235	34.017	29.141
15.685	27.78	94.878
214.597	642.061	135.504
56.331	16.561	76.292
111.696	34.594	16.678
76.971	40.905	22.884
25.475	29.984	174.944
11.819	22.623	20.038
75.924	34.788	154.229
13.547	335.846	96.681
50.892	34.113	65.866
127.392	30.403	13.745
69.087	286.416	483.022
101.026	28.495	131.763
76.359	37.46	79.65
9.939	122.536	523.304
91.502	45.47	42.522
20.744	41.221	299.711
16.406	33.669	347.913
17.16	142.929	82.808
140.933	29.064	42.517
65.006	25.475	43.09
218.198	32.363	206.98
139.963	196.777	108.123
47.616	26.948	35.943
58.165	210.631	77.807
13.363	38.372	320.865
142.392	23.209	45.558
121.878	48.047	75.894
100.723	32.38	66.754
92.118	64.916	138.16
103.262	62.401	20.839
62.565	23.614	186.68
16.519	258.345	149.178
126.329	41.889	83.339
38.14	356.316	15.638
38.925	33.816	67.932
152.658	37.34	98.649
12.572	33.115	43.512
25.146	367.338	41.92
24.949	31.238	122.231
13.773	35.358	124.182
224.934	34.683	14.906
57.621	387.444	176.463
58.334	36.579	69.458
86.844	36.12	73.326
38.213	33.254	151.053
65.749	87.51	43.394
74.197	24.323	60.406
65.597	36.948	43.163
12.694	36.254	43.513
72.078	132.415	42.459
65.074	113.659	42.134
82.58	37.262	38.111
141.116	145.026	111.543
66.606	247.665	192.866
96.16	25.557	42.072
100.284	40.191	104.112
41.526	32.799	44.366
60.628	36.477	76.256
15.641	34.215	118.723
73.902	88.282	42.302
7.955	114.492	42.494
102.759	28.092	117.034
102.726	167.603	43.693
12.305	64.122	275.601
57.487	38.436	16.89
37.717	34.26	44.165
31.571	37.191	26.401
125.397	35.211	169.21
14.055	133.185	63.641
69.528	337.094	31.548
75.945	38.041	69.877
15.997	35.44	60.997
99.972	50.145	32.493
39.774	208.491	80.317
99.729	32.396	188.942
15.542	131.941	32.406
18.829	551.932	183.793
13.294	155.411	22.983
136.501	34.892	43.657
100.391	35.74	41.771
15.407	54.277	157.143
20.032	111.136	98.824
14.599	25.1	244.412
133.916	14.197	100.754
95.28	52.684	43.636
113.849	221.425	153.348
107.23	20.999	55.316
94.061	33.998	379.159
16.34	33.795	43.34
12.204	32.61	15.998
934.311	355.392	70.982
69.784	43.7	40.439
13.547	20.747	51.379
44.567	29.254	152.409
63.857	29.881	57.407
13.89	193.445	75.595
86.844	174.947	205.1
79.752	289.405	233.637
41.353	31.37	43.235
22.664	37.7	34.129
183.742	181.939	79.015
56.557	120.519	43.376
68.875	35.002	11.063
48.008	38.48	37.364
28.657	37.528	27.85
44.352	33.393	14.205
45.655	101.28	299.444
14.541	30.007	149.681
51.321	35.714	154.744
73.896	243.335	40.496
43.694	35.368	171.804
15.7	29.024	93.467
80.881	90.509	16.242
165.563	34.224	15.647
70.014	88.036	186.284
11.968	35.525	45.15
44.079	299.185	47.671
44.907	31.598	38.539
65.944	104.324	42.743
13.088	35.908	59.649
193.397	34.025	170.472
15.468	32.294	109.728
136.103	240.775	43.608
86.424	115.825	39.962
13.294	37.526	52.072
161.809	413.141	97.794
11.773	261.904	15.05
138.522	34.321	41.651
67.584	33.878	160.86
41.392	32.503	99.388
109.027	28.313	83.126
204.327	38.132	62.148
36.443	64.403	15.299
69.367	34.438	51.919
9.171	32.815	18.977
158.368	372.84	134.596
76.845	43.055	47.086
194.435	32.681	13.934
125.146	32.702	266.538
113.223	408.751	97.247
47.582	37.187	48.634
15.91	36.041	39.17
77.385	47.569	13.75
58.313	33.087	67.099
30.115	206.722	96.775
32.018	190.891	106.44
239.15	34.487	14.22
59.577	155.51	159.416
79.7	22.338	13.141
84.833	383.798	97.561
13.756	145.404	62.988
168.824	68.893	116.686
14.197	33.909	153.894
78.144	36.673	20.564
13.357	31.402	161.018
85.062	27.358	250.818
185.855	28.257	147.032
80.491	460.36	222.56
78.42	134.927	49.954
265.893	24.597	73.096
133.606	79.661	17.151
119.484	153.379	214.104
127.39	35.412	44.451
13.426	39.398	43.979
115.634	292.935	133.989
38.534	37.423	187.624
68.338	29.881	15.373
80.965	397.917	207.111
41.422	39.447	32.159
204.53	523.848	118.022
26.668	33.556	45.891
61.458	39.134	30.435
35.701	27.59	14.174
42.716	34.408	87.709
13.801	40.206	150.085
68.038	70.952	42.344
51.255	37.28	237.08
12.97	221.443	195.112
205.491	85.534	299.145
117.938	35.412	41.278
118.692	131.531	233.262
15.342	27.904	59.727
51.289	37.495	417.295
13.683	123.912	31.366
139.426	74.255	75.555
88.681	141.359	627.718
42.066	31.284	58.796
60.212	37.594	32.945
140.143	17.503	459.003
49.302	33.476	200.913
59.955	32.294	18.089
74.799	15.508	374.047
139.477	22.632	36.519
39.697	25.248	102.799
101.891	67.614	43.597
136.603	148.005	45.536
16.03	17.52	41.549
139.811	31.585	39.953
71.47	17.137	100.752
16.461	141.557	44.898
98.604	39.294	24.826
15.011	377.799	67.379
56.183	32.034	129.883
103.998	128.625	36.065
89.068	33.059	585.52
11.948	357.531	54.796
65.687	32.645	43.539
59.457	36.458	41.788
67.501	297.092	36.919
60.802	379.993	40.237
123.262	39.205	39.293
43.259	74.617	27.16
52.802	36.322	36.039
48.639	167.428	40.665
11.554	197.698	66.281
70.681	166.307	41.581
14.851	75.352	35.722
105.636	34.665	73.918
34.224	167.974	117.766
118.611	199.807	86.853
96.311	167.813	39.469
81.74	32.824	35.122
74.26	305.24	129.437
55.683	26.462	127.823
179.484	30.521	31.297
16.411	31.498	85.229
95.494	440.129	102.334
13.518	35.506	45.246
13.077	62.614	18.584
167.147	101.922	31.274
105.478	112.493	64.397
12.869	34.289	48.443
82.243	198.434	161.634
12.273	70.559	52.339
10.788	31.796	55.174
136.366	35.231	100.891
92.256	274.082	82.552
34.779	253.671	36.897
69.776	30.319	45.556
133.451	29.868	38.142
59.317	30.048	27.748
58.717	33.486	44.744
74.321	41.994	42.336
135.863	22.739	103.975
34.734	36.237	43.386
106.994	133.892	46.67
88.933	33.734	45.893
49.208	32.828	37.648
65.469	30.327	73.676
63.622	29.395	16.797
89.852	46.658	33.916
122.911	36.86	101.051
26.959	30.897	26.899
63.616	17.491	21.126
75.634	113.042	61.923
11.42	94.19	43.977
70.991	13.963	96.964
163.232	38.8	21.558
114.912	117.216	100.112
16.373	203.396	41.012
81.716	31.461	71.756
75.386	130.442	41.837
56.305	89.533	44.177
101.28	67.294	43.276
53.038	123.915	43.014
19.19	35.139	58.826
80.537		57.939
117.577		34.1
91.565		42.145
193.28		75.987
13.315		17.74
55.485		42.907
24.249		81.54
73.001		20.109
52.6		122.52
14.629		30.222
41.774		67.551
18.712		78.289
102.653		45.594
89.251		45.83
12.738		39.241
65.678		29.182
165.514		67.137
114.201		29.157
16.258		16.54
81.17		42.658
78.8		42.519
72.401		158.876
15.093		45.662
76.573		159.883
155.812		18.85
159.286		37.126
144.357		96.416
104.458		116.966
229.118		43.484
75.868		227.701
46.756		44.365
96.03		35.336
12.918		85.432
281.912		130.062
13.048		136.965
131.604		37.544
120.292		35.283
276.996		130.562
17.609		89.923
64.903		144.136
157.072		65.435
48.204		39.947
125.859		40.19
191.588		46.53
15.696		46.431
62.549		44.365
16.492		13.184
144.568		89.904
15.799		44.637
48.322		508.102
53.228		20.627
34.146		84.045
15.324		104.791
19.632		42.531
142.644		62.047
153.762		44.821
31.955		237.456
47.35
106.233
147.423
40.206
84.671
65.174
168.042
18.199
172.033
153.741
16.898
39.081
229.81
298.962
68.124
55.026
76.134
128.179
93.687
21.374
111.521
123.382
17.766
104.038
16.03
48.816
54.045
116.501
252.674
155.057
62.811
402.692
372.947
15.793
60.474
52.315
160.527
49.807
87.933
223.049
213.715
125.176
38.431
284.175
319.756
177.982
16.854
181.752
24.285
151.67
104.895
148.29
13.2
182.86
67.573
38.285
39.249
85.728
46.579
200.022
70.224
13.683
48.843
144.131
218.978
