# Supplementary material for: The Ndc80 complex bridges two Dam1 complex rings
Source: eLife. 2017 Feb 13;6:e21069. doi: 10.7554/eLife.21069 (PMC5354518; doi:10.7554/eLife.21069)
Supplement: Figure 4—source data 1. — DOI: http://dx.doi.org/10.7554/eLife.21069.021 [file elife-21069-fig4-data1.xlsx]

## Sheet: Figure 4C
Table of residence times (sec) for Figure 4 C
wt Ndc80	wt Ndc80 + Dam1	Ndc80-10heptad	Ndc80-10heptad + Dam1
1.6	7	1.6	1
0.9	1.7	1.2	18.5
9.2	2.4	1.7	0.6
0.3	2.2	1.4	0.5
0.5	0.8	0.2	0.2
0.2	0.9	1.3	2.7
8.4	2.1	1.4	0.3
2.5	1.1	4.1	0.9
1.4	0.8	1.4	0.6
3.8	0.9	0.1	0.3
0.3	1.1	5.6	0.4
0.7	1.9	1.4	0.3
0.5	2.4	0.4	0.5
0.3	4.1	0.9	0.7
0.2	1	2.2	0.1
0.4	1.4	0.8	1
0.4	4.5	3.5	2.1
0.2	1.5	0.9	0.3
0.1	2	0.1	0.3
1	0.7	0.3	3.5
1.1	0.8	2	0.2
0.6	1.3	0.5	5.3
1.2	0.8	0.1	2
1.3	0.4	2.1	0.7
1.2	13.9	0.9	1.8
0.4	6.6	0.1	1.4
0.5	5	30.7	0.2
1.8	3.3	1.1	0.5
2.9	4.8	1.6	1.4
3.1	0.7	0.6	14.1
1.5	0.8	0.5	0.5
0.4	1.4	8.7	1.2
1.6	0.5	11.8	1.5
0.8	0.7	0.3	0.6
0.3	0.9	0.5	2.7
0.5	0.6	0.6	3.7
0.5	0.6	5.6	1.6
24.5	0.3	1	0.7
1.3	1.2	0.3	6.7
0.6	0.5	0.4	0.3
1	2.4	0.1	7.9
2.1	3.8	1.5	9.7
2.6	0.7	16.7	3
1.2	2.4	6.3	2.6
0.6	43.1	0.3	1.8
0.9	9.5	3.3	1.9
0.4	33.4	1.4	2.4
0.8	17.5	0.8	0.4
15.4	0.3	0.3	6.6
1.9	0.6	2.7	8.6
6.3	6.5	0.1	0.9
0.4	0.3	0.5	0.8
10.4	6.4	3.4	0.4
3	1	2.8	1.4
1.5	2	0.2	0.7
1.4	2.1	7.7	3.6
0.5	21.1	0.3	1.7
0.7	5.1	0.2	8.5
0.8	1.4	0.9	0.6
1.1	4.1	1.2	8
1.1	14	0.9	0.9
1	1.8	1.6	1
1.5	1.5	1.7	4.3
0.6	3.7	1	0.3
0.5	3.4	4.6	6.5
0.4	0.5	2.6	3.6
0.4	10.6	0.8	1.9
1.8	1	0.3	5.2
0.6	2.4	0.3	0.8
0.3	2.3	0.4	1.9
0.3	1.2	0.2	0.4
4.8	3.3	1.1	2.8
2.3	2.1	0.1	4.7
3.1	0.2	0.5	4.4
2.5	0.3	0.4	4.1
0.2	3.6	6.8	0.5
0.6	0.9	5.7	53.3
0.3	9.8	2.4	0.7
0.3	1.5	0.2	8
1.8	15.4	11	0.9
1.2	11	0.3	3.3
0.5	7.5	0.1	3.5
0.8	1.8	0.4	1.7
1.5	5.1	1	2.9
6.3	2.9	0.2	2.3
0.4	14.2	2.8	0.7
1.6	3.9	0.1	6.3
0.3	8.1	1.5	0.6
0.9	6.4	7.8	4.6
10.6	2.3	3.5	4.5
5.2	1.3	3.8	12
1.4	3.4	6.3	0.8
0.4	1	0.4	0.8
4.5	3.2	1.8	0.3
1.7	1.1	2.8	0.4
0.1	0.4	1	2.3
1	8	2.6	18.5
0.9	22.8	1.2	2
22.3	1.4	4.3	0.8
2.7	0.7	0.7	1
0.7	0.9	0.1	0.3
2.6	1.7	16.4	0.5
0.2	0.7	0.3	0.3
0.5	2.1	0.2	1
4.9	1.3	0.4	0.9
0.6	7.1	0.2	24.5
5.5	2.6	0.6	1.9
1.2	1.7	0.7	2.9
3.2	8.1	2.6	0.1
1.7	0.9	0.3	14.4
0.5	16.6	0.6	3.9
0.6	0.3	0.4	15
0.8	1.2	0.2	2
11.9	4.5	1.5	1.2
0.4	0.6	13.5	7.8
0.9	2.4	0.6	0.2
0.2	3.7	0.2	2
0.8	0.6	0.1	1.9
1	2.1	0.4	3.7
2.1	5.3	0.3	1.6
8	8.7	0.6	9.6
0.9	2.7	0.4	10.6
0.6	1.4	0.6	2.5
1.4	1.4	0.3	0.4
10.3	3	0.2	1.7
1.7	0.4	0.4	1.8
4.5	3.7	0.3	1.3
0.6	0.9	2.6	1.1
6.9	0.2	0.1	7
1.7	2.3	0.4	4.7
0.6	0.4	0.3	1.2
0.4	1.2	0.2	12.2
0.6	1.2	1.9	1.5
1.5	0.3	0.4	6.2
1.1	0.3	0.2	1.2
4.6	0.3	1.2	0.6
0.3	0.5	1.5	0.5
2	1.4	1.8	2.5
0.4	1.5	3.9	3.4
0.7	0.4	1	4.7
0.4	0.3	5.3	1
7.4	0.4	0.2	0.8
5.6	0.3	0.6	0.6
0.4	5	1.1	1.5
0.9	2.1	0.4	6.2
0.3	0.2	1.2	6.1
1	3.8	0.4	1
0.4	1.2	1.6	0.6
0.5	2.8	0.1	0.2
1.3	0.4	5.1	1.1
1.2	0.4	11.3	5
0.3	0.7	0.5	1.1
3.3	0.6	17.4	0.5
2	2.6	8.6	0.6
2.1	2	0.2	0.5
3	0.3	0.4	0.6
0.1	2.2	0.6	0.5
0.5	1.2	6.1	0.4
1.1	3.3	4.2	12
0.5	2.2	0.4	0.3
0.7	0.2	8.5	14
0.3	5.5	1.5	0.9
1.2	0.5	0.7	1.4
1.1	0.3	1.2	3.6
0.9	0.9	0.6	2.8
0.5	2.5	1.8	5.4
1.5	2.6	1.1	0.5
0.5	2	0.5	1.5
0.1	1	0.1	10.2
0.1	2.6	2.7	0.6
0.4	0.6	1.4	5.1
3.4	2.1	1.3	0.3
0.1	0.5	0.4	2.2
0.7	7.3	0.8	0.2
3.4	0.7	0.1	1.6
2.3	1.9	0.3	15.6
1.3	0.6	0.4	2.7
0.6	5.9	0.1	3.7
0.3	3.2	0.6	1.5
0.6	1.5	1	3.9
0.7	0.7	0.2	6.6
0.2	1.1	0.6	1.1
0.7	5.3	0.4	11.1
3.9	0.9	1.4	0.8
0.3	0.5	0.2	38.8
0.1	0.9	11.3	10.4
0.5	2.8	1.6	6.7
1.3	0.9	1.4	1.4
0.3	0.9	4.5	0.4
0.9	2	0.5	0.4
0.3	3.4	1.5	1.1
1.3	0.7	0.4	1.1
0.3	1.3	1.4	4.5
0.6	8	1.5	6.5
0.4	5.8	2.9	1
9.7	2.4	1.2	0.3
0.8	1.2	1.5	18.2
0.5	2.1	5.9	0.3
0.8	4.2	0.8	0.8
0.4	2.5	0.4	0.8
0.7	2.2	1.5	1.1
0.4	4.4	0.7	0.6
0.8	2	21.1	2.4
1	3.3	0.6	8
1.2	10.2	0.4	4.7
0.7	7.5	0.5	0.6
0.4	1.1	5.6	1.8
0.8	1.3	0.2	0.4
0.6	2.6	0.3	4
0.5	3.5	1.4	2.2
2.5	2.4	0.7	5.2
5.5	4.2	1.3	7.1
5.9	35.8	0.2	1.6
1.7	1.1	1.5	2.6
0.6	2.6	0.2	10.8
0.1	1.4	0.7	1.3
0.2	2.6	13.4	11.8
0.4	7.8	0.6	2
14.1	6.5	1.1	4.4
4.1	1.7	0.2	7.6
1.9	1.3	0.9	1.4
2.2	6.7	7.4	2.2
1.1	2	0.4	5
0.7	6.6	0.4	1.8
1.2	5.5	2.8	0.4
0.1	17.6	7.1	6
0.1	1.2	3.7	1.2
0.7	0.1	0.2	20.2
0.3	3	0.2	3.6
1.6	2.6	1	0.4
0.5	0.7	2	3.2
0.5	1.1	0.3	1
0.6	1.7	0.1	0.4
0.4	3.9	1.3	1
22.2	37.6	1.8	2.1
1	7.4	6	2.9
0.7	10.9	0.9	0.9
0.5	4.1	0.2	0.6
0.5	7.8	1.4	0.7
1.5	17.1	0.6	3.8
0.8	33.8	20.6	5.7
0.5	4.3	0.5	0.6
0.1	1.4	0.4	0.3
4.8	0.7	0.1	0.5
0.2	5.7	0.1	0.6
0.2	3.7	0.4	7.1
3.6	8.6	0.1	1.9
0.4	8.8	3.7	0.7
0.9	8.6	0.4	3.1
2.9	2.8	0.2	0.4
1.1	5.9	0.2	3.2
0.1	1.2	0.7	4.6
0.5	0.7	0.6	16.4
0.4	2.4	1.8	1.2
0.6	3	0.7	0.4
2.2	1	0.5	3.9
0.8	1.5	0.2	1
0.1	9.3	0.3	1.4
0.2	18.1	3.7	0.3
0.1	4.6	2	0.2
1.8	1.8	3.3	1
0.9	8.7	2.2	0.8
0.6	2.1	0.3	0.2
5.4	3.5	2.5	0.6
1.4	6.1	1	0.7
0.7	2.5	13.5	8.4
1.8	2.6	10.4	2.8
3	1	0.5	0.7
1	0.7	2.7	3.9
5.9	0.5	2.7	0.8
1.4	2.1	0.6	1.4
2.6	0.5	0.2	3.6
11.6	6.1	0.5	1.4
1.5	1.4	0.1	0.6
2	0.7	2	0.5
7.5	0.5	13.4	4.3
0.7	0.3	10.5	68
1	10.4	13.3	1.2
3.5	1.1	0.9	1.8
0.4	3.3	0.4	1.6
4.8	4	0.8	1.9
0.6	1.4	2.7	1.5
0.8	2.3	0.2	0.5
2	0.6	0.6	17
6.6	0.5	2.5	0.2
1.4	0.5	0.4	1
1.3	0.1	0.1	0.5
1.2	0.4	0.7	4.3
1.6	0.6	1.1	1.1
2.1	9.5	0.3	1.1
0.6	1.5	0.4	0.3
0.8	5.4	0.3	17.6
1.1	2.3	0.3	1.3
8	5.5	0.1	0.9
2.3	18.9	0.5	7.2
1.9	9.7	1.5	14.3
0.4	11.9	0.1	1.3
11.2	11.4	0.6	0.7
0.5	0.8	0.2	0.8
2.1	1.5	0.4	0.1
0.6	1.2	1.1	18.7
14.7	1	14.9	4.6
6	2.6	1.1	3.3
0.6	1	0.5	1.9
1.6	0.8	0.1	0.4
0.5	16.2	4.3	0.7
0.8	1.5	0.7	0.6
1.2	4.2	0.6	30.7
1.2	1	1.4	5.3
5.4	2.2	0.9	2.7
0.5	9.2	0.2	8.1
1	2	1.8	0.2
0.5	5	1.6	0.2
0.6	3.5	8.4	7.4
0.6	5.2	5.5	3.5
3.9	2.5	10.4	3.2
2.7	3	0.3	4.2
1	0.7	0.2	0.3
0.6	1.7	4.5	0.7
13.8	40.7	0.2	6.3
2	0.8	0.2	7.5
1.6	0.9	1.7	7.8
1.9	0.9	2	15.9
0.9	1.6	1.8	1.3
1	1.2	7.2	7.8
1.6	2.3	0.7	7.3
0.5	1.7	0.1	2.9
0.5	3.9	0.1	17.6
6.4	27.5	0.8	9.5
5.1	1.3	10.6	2.8
1.8	0.6	0.1	2.9
0.6	2	2.6	2.7
0.9	1.2	0.1	2.1
0.4	19.5	4.4	0.9
0.8	1.5	25.1	1.1
1	3.1	3.1	1.6
0.8	0.8	0.1	0.3
1.3	0.6	0.2	2
1.8	13.9	0.6	25.5
16.9	0.8	4.5	0.7
0.9	0.3	12.6	17
2.4	0.6	1.4	7.2
0.3	0.4	0.7	0.7
1.3	3.5	0.3	2.2
1.6	5.3	0.4	0.8
1	1.6	1.7	2.5
3.7	2.9	0.9	4.2
0.3	2.2	2.7	5.3
0.6	1.5	0.1	4.9
4.6	4.9	1.2	59.9
1.5	0.7	0.5	1.3
2.5	3.4	0.3	1.7
1.9	1.6	0.4	1.4
1.7	15.9	0.2	2.7
2.1	2	0.4	9.3
1.4	1	0.2	3.1
1.5	5	6.5	0.6
0.4	14.7	3.5	0.4
0.6	0.7	0.2	2.7
12	0.7	0.8	9.7
2.3	11.5	1	7.4
1.6	9.6	0.5	3.5
1.3	2.2	0.3	0.3
4.3	8.1	0.5	106.4
1.8	4.2	0.4	2.4
1.4	5.7	0.2	1
2.3	0.7	1.6	2.2
1.7	2.7	4.6	10.9
0.9	0.7	0.3	3.2
6.8	2	0.6	0.4
2.5	5.5	1.1	48.5
0.6	0.4	0.4	5.1
0.4	0.5	3	8.1
2.8	10	0.5	8.3
1	13.5	0.6	8.5
1.6	1.5	3.3	6.3
0.5	1	0.2	23.7
4.4	3.9	1	3.9
0.2	0.5	0.3	11.1
1.9	6.3	0.7	0.9
1.7	7.6	0.2	3.5
0.8	0.4	0.2	5.9
1	1.1	1.4	1.1
0.7	0.7	1.1	11.1
0.6	6.2	0.6	0.3
1.6	0.3	0.4	5.5
1.9	15.7	10.8	11.5
0.4	0.6	0.2	21.4
2.5	2.2	9.8	2.2
0.7	0.4	1	2.3
0.5	3.9	1.7	16.6
1	0.8	1.1	30.1
1.5	0.3	0.5	11.6
1.1	0.5	0.3	9.5
0.4	1	1.1	2.5
1	1.6	5	1.5
0.5	4.1	1.1	4.9
4.9	2.2	0.4	3.2
0.6	0.4	7.5	3.5
3.2	6.7	13.3	2.9
2	3.4	1.2	3.4
6.2	0.6		1
0.8	8.3		5.5
0.3	0.5		5.2
1	3.7		0.8
1.3	0.8		14.6
2.7	3		14.3
0.5	1.4		23.3
1.1	4.3		2.7
1	5.7		25.6
1.4	11		1.1
3.8	2.7		0.9
0.4	2.2		0.2
1	2.8		58.5
2.5	1.1		4.2
1.4	0.6		32.7
5	3.6		15.9
0.7	0.4		20.3
0.4	0.6		0.4
1.1	2.5		1.9
5	4.5		1.4
1.5	16.2		3.5
1.5	2.4		1.3
0.5	11.2		33.8
0.5	8.5		2.5
0.9	11		3.5
0.7	0.7		0.8
0.7	4.5		0.6
1.6	1.9		3.3
0.7	4.1		4.4
1	0.9		1.3
6	2.2		15.9
1.3	1.2		1.3
0.9	2		3.9
1.6	2.7		0.3
0.7	1.5		1.7
2.1	3		1.5
0.9	0.9		17.7
0.8	1.7		0.8
1	0.5		22.7
0.7	2		23.9
0.3	3.7		0.2
8	5		2.4
1.2	4.4		0.1
0.7	4.5		0.3
3.9	10.2		1.2
3.7	1.8		0.8
1.7	1.8		4.6
9	2.7		1.8
18.2	11.8		2.1
1.1	23.6		2
1.6	5.8		12
16	9.5		0.4
0.6	2.4		0.5
0.9	3.2		1.4
1.5	0.7		7.6
2.8	3.1		1.3
0.9	0.5		4.2
0.4	9.3		17.5
0.9	3.8		10.5
0.5	0.6		18.5
0.7	0.5		1.7
1.1	13.1		1.8
1.5	11.8		1.4
0.9	0.3		3.7
0.8	0.3		3.5
0.6	0.5		1.8
0.5	0.9		5.6
0.6	0.9		0.6
0.1	1.1		1.4
0.3	2.7		4.8
0.3	8.5		0.8
0.2	0.7		11.3
25.4	5.5		1.3
1.7	12.6		2.5
1.6	13.1		1.4
5.8	7.7		11.4
4.3	7.7		0.6
4.5	1.1		0.3
0.6	3.3		1.6
0.8	2.2		10.6
0.5	0.5		9.3
0.7	1.3		7.1
4.5	1.4		0.6
0.8	7		13.8
1.7	3.8		31.2
0.3	3.2		6.7
0.9	0.8		13.9
8.9	2.3		12.5
2.1	6.3		5.1
0.1	1.4		10.1
4.1	0.8		0.8
0.3	3.4		3.2
3	3.8		3.4
0.5	2		1.8
0.5	11.2		0.4
2.2	18.2		1
2.4	6.1		0.2
4.4	2.4		0.5
3	2.8		15.7
2.1	4.1		15.8
0.8	7.9		1.6
4.4	2.9		7.5
0.7	1.7		0.6
6.3	12.2		0.3
1.5	12		8.2
9.5	3.4		4.7
1.6	3.3		0.3
2.2	3.2		0.9
1.4	2		50
0.2	1.5		1.4
22.2	2.4		9.6
0.7	4.9		1.5
3.8	0.3		7.6
1	5.5		0.4
1.8	17		10.5
1.1	1.9		10.4
0.7	2.9		6.3
0.6	0.5		1.5
1.2	0.6		0.5
0.7	1.2		0.3
2.1	2.3		5.6
6	0.4		1
2.8	3.5		16.2
0.8	2.3		2.1
0.4	2.4		7.2
2	2.3		1.7
1.7	1.3		3
1.4	8.8		11
0.7	22.5		2.2
0.5	2.5		0.4
9.6	0.9		0.3
1.3	1.3		0.6
2	11.4		19.5
1.5	1.3		3.2
0.8	2.1		0.3
0.9	3.2		36.7
0.1	2.6		12.7
0.2	3.4		0.7
1.3	1.6		15.2
14.2	0.7		6.1
2.1	1.1		5.9
2.9	1.6		0.6
1	2.7		0.6
0.6	2.2		11.5
0.7	25.3		17.5
1	4.7		0.9
1.1	0.6		0.7
7.4	2.5		1.3
0.9	0.8		8.1
4	4.7		5.8
2.3	1.2		1.5
1	0.7		0.6
2.3	0.8		0.1
0.7	7.8		0.4
0.8	21.7		1.6
0.5	2.7		0.4
1.7	3.2		7.9
0.3	0.4		0.3
1.1	5.4		0.6
0.2	0.6		9.2
2.1	0.8		2.4
14.4	5.2		0.3
2.5	1.1		6.2
1.2	0.7		9.5
0.6	0.6		1.2
1.6	2.9		0.2
5.4	3.7		2.4
14.7	1.8		8.4
5.6	4.7		0.4
0.5	11.9		10.2
3.6	2.9		3.8
2.3	6.1		10.2
1	0.2		0.7
1.3	0.7		3
1.1	2.1		6.6
1.8	1.3		12.4
0.9	41.4		14.1
0.4	11		0.4
0.4	8.3		0.9
1.9	2		1.6
1	0.9		3.6
0.3	1.1		0.6
0.2	1.3		11.6
0.2	1.9		4.5
1.8	3.6		20.8
1.3	4.9		1.4
2.5	0.8		6.1
1.4	0.7		0.8
0.6	1.9		2.8
1.3	0.6		1.3
0.6	1.8		6.3
6.8	3.7		0.5
0.9	1.7		6.2
1	1.5		3.6
0.9	0.7		0.3
1	0.7		0.3
0.4	1		1
0.4	0.9		9.1
0.7	2.3		13.6
0.6	0.5		0.5
1.6	0.4		7.1
1.1	0.4		1
1.7	18.3		4
0.7	2.8		0.2
3.3	1.3		0.4
1	0.9		4.5
1.1	1.5		25.3
1	3.7		2.1
4.3	9		0.5
2.9	25.3		2.4
8.2	8.5		9.1
1.4	1.3		1.6
1.7	3.3		2.3
5.6	7.2		3.1
1.3	1.9		0.6
1.2	0.5		0.8
1.3	1.6		1.1
19.1	1.4		0.7
1.4	1.4		1
1.6	7.7		2.2
0.7	4.9		0.4
0.2	10.9		0.3
2.5	1.3		2.2
1.3	5.4		15.7
1.9	2.8		1.2
0.9	1.7		0.6
1.5	0.6		0.4
1.5	1.9		0.1
0.5	2.3		0.3
0.7	2.2		10.6
1.1	1.7		4
1.2	1.6		0.2
1.3	8.4		4.9
2.5	0.9		1.5
1.1	1		5.9
0.9	1.7		6.3
1.8	2.2		3.3
0.7	1.4		1.7
1.2	6.2		0.7
0.7	0.6		9.6
9.7	1.4		7.1
0.7	3.7		1.4
2.3	0.8		0.6
0.7	0.5		1
0.8	0.5		1.7
0.5	0.9		8
1.3	0.7		0.1
0.5	0.7		23.7
0.4	3.6		1.3
0.1	3		1
0.4	2.9		1.8
0.4	0.4		1.1
0.5	1.1		1.5
0.7	1.8		0.4
3.4	9.6		0.9
0.6	0.8		2
1.3	1.7		0.4
5.9	1.8		0.4
56.2	17.8		0.8
3.1	0.9		7.7
3.1	0.3		2.2
1.2	5		0.4
1.6	0.4		27.9
1	1.3		1.4
0.7	1.3		5.6
1.1	3.3		12.2
0.9	6		0.5
1	7.3		1.7
4.8	6.2		4.9
1.6	2.5		3
2.5	0.6		0.9
2.4	8		12.3
1	2.8		0.2
1.2	5.3		0.1
1.1	5.2		1.3
0.6	7.2		0.7
5.8	4.8		2.5
4	1.2		0.7
1.5	0.8		1.3
0.3	0.9		3.7
1.8	4.2		2.2
0.6	1.3		0.7
1.6	2		9.9
0.6	2.1		1
0.5	8.1		9.9
0.7	12.6		2.3
0.8	4.8		0.7
0.9	2.3		1.6
0.9	2.8		4
3.2	3.7		3
0.8	3.6		0.5
1.4	4.7		1.1
9.3	1.9		0.3
3.6	2.9		5.5
1.7	1.1		2.5
0.7	1.7		0.7
29.2	0.8		0.4
1	0.8		2.7
0.2	7		0.5
0.8	8.6		2.1
9.4	4.5		0.8
9.6	0.9		0.6
3.6	1.5		0.3
1.3	2.7		13.7
0.8	2		0.3
20.2	1.2		3.6
0.9	1.6		0.7
2.4	3		0.9
0.8	1.7		1.2
3.2	5.2		3.5
1.9	8.2		9.6
2	1.1		0.9
1	1.5		0.4
10.9	0.7		9.2
2.3	1.2		4.9
1.1	1.9		2.2
1.9	6.1		9.9
1	6.5		5.4
0.8	1.5		4.9
0.7	6.8		1.3
0.7	1.8		0.2
1.6	3.5		5.2
0.5	2.5		2.3
3.7	1		40.6
0.5	0.8		3.4
5.8	0.3		0.7
1	0.7		5.5
0.3	9.8		4.6
0.4	1.5		4.4
1	31.3		13.5
1.2	4.3		1.8
0.4	2.7		0.8
1.6	8.2		2.8
4.1	6.9		2.6
3.2	1.7		2.3
2.3	1.3		3.7
0.5	23.4		1.4
2.7	4.6		0.7
1.8	9.4		19
0.5	5.3		2.4
2	0.6		25.3
1.6	11.4		3.3
2.4	5.2		2.8
0.8	1.8		1.7
1.3	0.4		1
7.1	1.1		3.5
2.1	16.7		4.7
6.8	3.2		2.1
1	4.6		0.8
0.9	0.9		1.3
0.6	0.9		3.2
0.5	3		1.7
2.8	2.6		1.7
0.5	2.6		3.5
0.3	1.8		1.9
0.5	13.9		8.4
0.6	0.8		0.7
0.8	27.6		1.5
14.7	11.2		2.9
5.1	1		2.8
2	1.7		6.3
0.6	2.2		7.9
6.8	0.5		6.5
0.8	0.7		0.4
2.7	1.5		1.2
0.8	1.8		1.4
0.7	1.1		11.3
0.7	22.6		15.9
1.1	1.5		0.3
0.2	0.7		2.5
1.5	1.1		6.3
1.5	2		0.5
4.8	0.4		1
2.8	0.9		28.6
1.8	7.7		6.7
2.5	3		37.8
0.8	8.3		0.4
3.9	1.7		0.5
0.4	1.5
0.7	0.8
0.5	1.3
1.2	5
0.4	1.4
1	2.3
0.8	0.7
1.8	0.5
1.6	0.5
6	0.5
1.1	0.5
1	0.5
2.4	0.5
2.7	0.4
12.9	8
1	4.6
10.3	2.4
2.2	2.2
1.2	4.3
1.3	1.8
14.6	0.9
2.5	1.3
0.6	1.5
0.3	6.4
3.2	3.9
2.6	2.4
0.6	6.9
0.4	10.6
2.2	1.4
6.8	2.3
4.4	12
1.7	16.2
3.7	1.3
5.4	3.4
0.8	5.3
0.8	1.2
0.8	0.4
18.8	0.8
27.9	3.2
0.8	0.7
0.3	0.8
0.7	4.2
0.7	8.7
0.7	0.5
1.6	4.3
1.7	0.7
0.7	4.2
5.6	2.1
4.6	9.4
1.5	2.1
0.8	1.2
0.8	18
1.8	16.8
5	5.1
6.7	14
1.3	27.1
0.7	2.4
0.9	43.3
2.4	9.4
0.9	2.7
2	10.5
2.2	2.4
2	3.3
18.1	0.9
1.6	0.4
2.4	1.4
1.2	2
1.2	1.6
1.4	1.8
13.3	14.8
19.8	1.1
52.1	1.2
0.5	6.6
0.2	4.4
0.4	1.6
2.1	20.1
0.7	16
0.8	10
1.4	24.2
0.9	1.9
2.3	15.3
2.1	10.7
4.9	7
0.5	7.1
0.5	4.8
0.4	8.6
2.9	8.8
0.9	13.3
4.1	0.8
0.9	2
0.7	3.8
2	4.6
1	8.3
1.9	1.7
0.6	0.9
0.5	2.7
0.4	0.9
0.2	1.8
3.7	0.8
1.9	0.6
0.8	0.7
1.5	0.5
4.8	2.5
17.8	0.5
0.8	0.4
12.5	0.7
0.6	0.6
0.6	0.5
0.4	2.5
0.2	3.2
4.8	1.8
1.9	1.2
0.4	5.8
0.8	11.4
0.7	32.6
1.1	4
3	3.3
0.6	2.8
4	2.3
1.4	12
1.2	1
2.1	8.2
0.9	1.5
4.4	0.5
0.7	1.2
0.3	4.6
0.2	0.3
0.1	0.5
0.9	5.3
0.9	1.1
11.7	15.9
1.4	9.2
0.5	2.2
1.8	3.2
0.7	2.7
1.2	3.8
0.7	18.9
0.3	18.6
4.5	8.3
0.9	4.4
1.6	1.7
0.5	1
0.1	1
0.6	1
1.7	7.3
1	12.2
0.4	1
3.6	14.7
0.4	0.8
1	4.3
0.5	7.1
1.6	6.7
4.4	2.3
0.8	3.9
0.4	6.3
0.7	1.2
0.5	0.6
2.4	6.9
1	1.1
1.6	1.8
0.6	0.7
2.7	1.2
6.3	1
1.4	5.2
0.5	16
1.6	2.5
0.9	1
0.6	1
16.6	1.9
1.8	1.3
1.9	0.4
1.3	0.8
25.6	0.6
2.6	0.5
1.6	0.4
10.5	0.6
0.5	1.8
1.2	5.9
1.1	4.2
0.9	1
2.2	0.4
0.6	6.1
0.7	1.1
0.7	9.2
0.8	2.5
12.1	15.2
1.4	31.7
1.3	9.4
0.6	6.2
0.2	0.6
0.7	2.6
0.2	1.8
0.4	5.2
0.4	0.9
0.6	1.2
4	1
2.9	16
0.7	1.4
9	5.5
3.3	4.4
0.6	1.5
0.5	1.3
0.9	1.5
46.7	4.6
58.5	4.2
0.7	6.6
1.1	5.1
2.8	29.4
14.3	24.7
1.2	2
1	3.9
0.5	1.1
1	9.5
1	2.2
1.1	6.1
1.6	13.2
1.8	1.3
1.3	1.5
0.2	2.8
13	1.3
0.3	3.4
5.6	1.5
0.6	0.8
10	0.8
0.4	3
0.9	0.7
0.7	2.3
1.6	0.9
0.4	1.3
1.4	15.3
0.3	1.5
0.5	0.8
0.7	1.1
0.4	10.9
0.2	8.9
0.7	3.5
0.8	4.8
0.8	1.9
0.6	0.4
2.2	5.9
5.3	6.1
2.9	9.2
0.7	2.5
0.2	1.7
0.5	0.7
0.4	2.4
1.3	0.9
1	0.6
0.7	1.3
5.6	7.4
2.2	3.2
9.2	18.3
2.2	4
3	3.6
8.3	16.4
3.6	2.7
0.4	4.1
3.9	1.3
2.3	14.2
0.7	8.1
0.4	3.6
1.1	12.8
5.3	1.2
1	0.4
0.8	0.6
1.7	1.1
12.4	0.7
1.6	0.5
1.1	1.2
1.5	13.4
1.1	17.3
0.6	2.2
1.1	14.2
0.5	4.1
1.8	2.5
0.9	21.2
0.6	10.5
1.8	1.3
0.8	1.7
2.8	1.4
0.6	1.1
0.4	8.5
4.6	0.7
4.2	0.8
0.8	1
0.7	0.5
1.3	5.6
0.6	54
1.9	4
0.6	2.8
0.1	6.2
1.9	2.2
0.3	11.4
2.3	33.1
1.7	1.5
1.7	1.1
2.4	15.4
0.9	2
5.7	2.5
9.2	5.7
2	5
0.4	10
5.4	6.8
0.8	2.6
0.1	1.4
2	4.8
5.7	4.3
1.2	3.8
2.5	1.7
3.2	21.6
1.1	1.8
1.2	0.1
1.5	0.9
0.4	7.4
0.9	1.8
0.1	2.7
3.9	0.9
1.4	1.5
4.9	5.7
1.9	4.1
2.2	9.4
2.1	44.5
1.3	28.6
1.7	2.5
1.2	12.2
0.3	2.8
1.6	1
23.3	0.8
1.9	0.8
2	2.7
0.2	16.7
0.3	11
4.8	5.5
0.8	1.7
4.8	0.6
0.7	8.3
1.2	2.9
3.3	0.3
2.3	4.8
0.4	20.1
0.2	1.5
0.5	8.1
0.3	0.5
0.9	3.5
0.5	9.4
8.8	76.6
3.6	6.3
1	4.4
2.2	5
3.8	1.4
1.5	2.6
1.9	1.1
9.3	32.9
4.8	7.5
10.6	7.6
1.2	1.5
2.3	0.9
6.7	0.4
1.6	7
2.3	1.4
4.1	2.3
0.9	1
2.4	10.6
8.7	38.3
1.6	0.9
2	36.8
4.3	1.5
0.7	4.1
0.5	3.3
0.7	0.5
2.5	30
1.8	12.5
3.7	26
2.3	4.1
12	2.2
2.4	0.9
6.3	0.5
1.7	20.8
3.4	12.2
0.4	1.1
8.7	2.1
2.4	5
1.1	5.2
0.6	1.3
1.7	31.4
1.4	7
1.3	24.9
0.3	0.3
1.5	1.6
0.4	1.3
0.4	0.4
0.5	0.3
1.3	1
1.5	20.2
0.9	8.4
1	1.3
0.9	5.1
0.5	7.3
2.4	2.4
3.1	0.8
0.8	3
1.4	3.6
0.2	3.1
6	3.4
0.7	24
0.4	7.1
5	6
1.1	5.9
1	23.5
1.2	9.4
1.9	7.2
0.4	11.1
0.3	6.9
0.3	2.3
16.1	3
0.5	7.6
0.6	25.4
0.3	2
6.7	5.8
1.1	7.9
0.8	9.3
0.4	1.9
5.4	0.9
1.9	0.9
3	0.9
0.6	7.3
1.1	0.8
4.3	0.5
5.5	4.2
1.5	0.7
11.1	0.7
2.5	13.3
1.8	5.7
4.6	9.1
2.2	7.6
0.5	10.3
14	11.4
1.4	15.2
0.1	2.6
1.7	18.1
1.7	6.5
1.2	0.5
1.9	1.5
5.7	0.7
0.4	0.8
1	9.3
	13.5
	4.9
	2.1
	2.8
	1.2
	28.6
	0.8
	1.7
	3.1
	2
	14.1
	2.1
	1.1
	2
	17.9
	13.5
	23.2
	1.9
	9.3
	12.2
	1.9
	1.4
	1.9
	0.8
	2.9
	0.8
	1.4
	1.4
	4.3
	4.3
	4.9
	2
	0.7
	16.7
	3.4
	0.5
	20.8
	0.6
	1
	0.5
	0.6
	0.7
	0.6
	5
	0.6
	1.2
	1.9
	0.7
	1.3
	0.4
	8.1
	0.6
	5.1
	2.3
	5.2
	11.2
	0.4
	2.7
	4.4
	0.6
	0.8
	0.5
	11.3
	0.5
	4.9
	2.3
	1.9
	2.2
	4.4
	1
	0.5
	0.4
	63.5
	0.6
	0.7
	0.5
	2.1
	1.5
	4.8
	4
	0.4
	13.4
	3.6
	4.2
	23.4
	0.8
	4.1
	0.6
	8.9
	1.1
	1.3
	2.5
	0.9
	0.7
	3.9
	0.6
	3
	7.9
	1.2
	0.6
	3.5
	0.9
	0.2
	40.1
	0.8
	9.1
	4.8
	3.6
	0.8
	3.7
	1.6
	5.6
	10.1
	0.4
	5.3
	0.8
	2.5
	1.8
	1.9
	0.2
	0.9
	0.7
	2.9
	28.4
	4.9
	0.6
	1.6
	2.8
	1
	0.4
	33.3
	9.4
	5.1
	1.8
	5.5
	35.6
	2.2
	0.6
	2
	0.4
	3.4
	0.4
	0.4
	0.9
	12.1
	1.2
	0.8
	61.2
	8.4
	3.1
	3.8
	9.6
	1.8
	5.1
	1.2
	25.3
	6.5
	0.7
	1.3
	1.8
	1.1
	4.2
	0.6
	3
	5.3
	1.9
	2
	4.6
	2
	0.4
	0.3
	1.9
	5.4
	1.7
	5.3
	1.1
	1.3
	3.6
	0.9
	0.5
	5.1
	8.1
	14.7
	1.2
	0.3
	0.4
	2.6
	0.5
	1
	15.8
	4.2
	2.8
	3
	2.1
	1.5
	31.9
	9.8
	26.8
	0.4
	7.8
	2.3
	1.8
	0.9
	0.5
	0.4
	1
	0.5
	6
	1.5
	20.2
	0.9
	0.5
	1
	2.3
	6.3
	5.9
	1.6
	0.3
	0.7
	2.5
	6.4
	0.7
	6.2
	0.8
	24.4
	1.4
	1.3
	5.9
	42.1
	2.4
	1.2
	0.1
	1.8
	1
	18.3
	1.9
	7.6
	1.9
	3.6
	2.6
	1.6
	11
	1.3
	0.7
	0.9
	9.4
	5.8
	14.4
	3.6
	2.6
	6.6
	28.5
	12.4
	0.7
	1.1
	0.8
	12.8
	1.7
	3.3
	0.8
	0.6
	3.9
	1.2
	0.6
	8.3
	26
	1.3
	2.5
	1.9
	4.9
	2
	1.9
	0.5
	1.8
	1
	3.4
	5.3
	0.5
	6.8
	1.5
	1.1
	0.5
	1.3
	0.9
	1.6
	6.5
	3.3
	2.4
	0.3
	12.5
	1.8
	3.4
	0.9
	6.4
	11.5
	24.9
	0.4
	42.1
	9.3
	1.5
	15.6
	1.5
	0.7
	1.5
	4.7
	1.7
	1.3
	0.8
	0.6
	3.7
	23.4
	5.1
	35.9
	31.2
	4.3
	5.1
	6.4
	9
	8.6
	2.4
	0.6
	1.7
	2.1
	30.1
	2.2
	3.4
	8.1
	3.1
	0.4
	0.3
	10
	2.3
	3.9
	10.1
	23.1
	9.9
	10.1
	3.7
	24.5
	6.9
	1.1
	1.2
	0.6
	7
	1.1
	5.1
	6.2
	3.9
	2.6
	2.1
	1
	1.5
	1.1
	3.7
	16.5
	24.3
	1.3
	6.2
	13.8
	2.8
	0.8
	2.3
	1.1
	0.9
	2.4
	1.9
	9
	1.9
	2.2
	10.6
	4.3
	11.8
	4.3
	3.3
	1.6
	20.6
	1
	1.9
	1.1
	17.9
	8.4
	7.2
	1.2
	2.2
	0.5
	7.2
	10.8
	4.9
	4.2
	13.6
	0.4
	1
	0.4
	0.3
	0.1
	0.6
	0.7
	0.4
	1.1
	69.2
	4.6
	3.4
	3
	5.1
	14.2
	0.6
	0.8
	0.9
	3.2
	1.2
	5.9
	2
	0.5
	2.1
	2.6
	12
	3
	13.9
	1
	0.4
	0.1
	13.6
	2
	16.8
	21.8
	18.2
	1.4
	3.4
	38.7
	2.4
	2.7
	1
	9.2
	1.9
	2.2
	0.5
	2.4
	0.5
	0.6
	6.4
	0.4
	19
	1.7
	4
	2.9
	0.7
	1.4
	3
	7
	0.6
	0.7
	0.8
	4
	2.6
	1.7
	1.3
	12.4
	35.2
	5.2
	19.6
	7.9
	3.1
	4.2
	5.7
	0.2
	0.4
	0.2
	0.5
	9.2
	5.5
	0.5
	0.6
	0.6
	0.5
	2.3
	0.8
	0.1
	3.4
	0.5
	0.2
	3.7
	5
	4.4
	4
	3
	3.9
	9.7
	19.2
	6.4
	0.9
	1.5
	1.2
	0.9
	0.4
	4.1
	1.9
	0.8
	0.5
	13.8
	52.2
	9.7
	6.5
	1.3
	21.7
	7.2
	1.6
	0.6
	14.1
	18.9
	9
	0.8
	0.6
	7.2
	2.4
	10.8
	1.4
	0.1
	3.6
	7.9
	5.3
	1.9
	1.6
	4.2
	7.5
	1.4
	0.3
	0.6
	8.5
	8
	1.5
	25.8
	2.9
	0.8
	0.7
	2.4
	1.6
	2.9
	2.2
	19.3
	11.2
	6.7
	4.4
	1.5
	10.4
	2.4
	0.6
	0.6
	0.6
	1.1
	0.6
	2.3
	2.2
	1.7
	0.6
	0.9
	1.4
	5.4
	12.3
	4
	3.7
	6.7
	0.3
	21
	0.8
	4.4
	1.3
	4.9
	0.7
	1.7
	6.3
	2.9
	4
	2.4
	20.5
	3.8
	5.3
	9.4
	2.3
	1.4
	28.3
	0.8
	0.8
	0.3
	0.3
	7.9
	0.7
	1.3
	0.8
	16.6
	7.3
	1.2
	1.3
	1
	4
	1.5
	3.3
	0.6
	0.4
	0.5
	0.4
	14.6
	35.7
	22.2
	0.8
	0.6
	6.6
	4.6
	94.2
	5.2
	15.2
	4
	5
	42.7
	3.7
	13.1
	4.2
	26
	1
	2
	0.6
	1.8
	11.5
	0.1
	0.2
	19.8
	2.4
	1.5
	18.5
	2.2
	0.9
	2.7
	23.2
	8.9
	7.8
	6.8
	0.4
	0.6
	19.4
	53.3
	1.1
	5.3
	1.1
	5.4
	0.7
	0.5
	7.5
	16.8
	22.3
	6.9
	0.3
	2.8
	0.8
	11.4
	1.8
	1.4
	5.8
	7
	1.5
	1
	3.9
	6.2
	1.7
	2.2
	1
	0.2
	0.4
	1.2
	3.7
	2.2
	0.6
	13
	2.1
	1.1
	1.4
	1.1
	0.3
	0.5
	1.5
	4.5
	1.8
	0.9
	0.9
	1.1
	6.8
	2.4
	0.8
	0.7
	1.2
	5
	2.1
	1.8
	8.2
	1.8
	4.6
	4.4
	9.8
	4.4
	1.7
	1.5
	2.5
	1.7
	2.7
	2.9
	1.9
	2.4
	4.3
	4.3
	1.4
	0.3
	5.2
	3.7
	2.1
	12.3
	12.7
	9.7
	3.3
	7.1
	0.5
	6.1
	57.1
	4.9
	31.7
	4.4
	1.9
	12.8
	1.1
	0.9
	0.3
	4.6
	8.1
	4.9
	0.6
	4.4
	4.5
	35
	2.3
	23
	2
	1.1
	54.2
	0.9
	1.4
	0.4
	1.7
	1
	16.4
	0.9
	0.2
	2.4
	1.2
	1.1
	2
	1.3
	1.2
	7.4
	1.5
	0.9
	1.4
	28.4
	9
	10
	1.2
	4.9
	3.2
	12.5
	3.2
	1.6
	1
	0.5
	1.4
	0.7
	0.7
	0.6
[truncated: 53 more rows]
