# Supplementary material for: The Ndc80 complex bridges two Dam1 complex rings
Source: eLife. 2017 Feb 13;6:e21069. doi: 10.7554/eLife.21069 (PMC5354518; doi:10.7554/eLife.21069)
Supplement: Figure 6—source data 1. — DOI: http://dx.doi.org/10.7554/eLife.21069.026 [file elife-21069-fig6-data1.xlsx]

## Sheet: wt Ndc80
Each Mtw1-YFP and Dad4-CFP pair represent intensities for one pixel (60 nm)
wt Ndc80
Cell #	1			2			3			4			5			6			7			8			9			10			11			12			13			14			15			16			17
	Mtw1-YFP intensity	Dad4-CFP intensity		Mtw1-YFP intensity	Dad4-CFP intensity		Mtw1-YFP intensity	Dad4-CFP intensity		Mtw1-YFP intensity	Dad4-CFP intensity		Mtw1-YFP intensity	Dad4-CFP intensity		Mtw1-YFP intensity	Dad4-CFP intensity		Mtw1-YFP intensity	Dad4-CFP intensity		Mtw1-YFP intensity	Dad4-CFP intensity		Mtw1-YFP intensity	Dad4-CFP intensity		Mtw1-YFP intensity	Dad4-CFP intensity		Mtw1-YFP intensity	Dad4-CFP intensity		Mtw1-YFP intensity	Dad4-CFP intensity		Mtw1-YFP intensity	Dad4-CFP intensity		Mtw1-YFP intensity	Dad4-CFP intensity		Mtw1-YFP intensity	Dad4-CFP intensity		Mtw1-YFP intensity	Dad4-CFP intensity		Mtw1-YFP intensity
	115	200		115	191		121	193		120	170		117	185		121	228		115	192		116	173		110	161		112	169		111	164		105	174		109	158		113	192		117	191		115	169		109
	123	198		115	191		123	208		121	182		121	187		123	223		116	202		119	169		110	161		108	177		110	165		111	175		107	166		112	210		115	201		118	175		105
	126	193		115	191		124	229		126	178		121	187		127	247		124	203		115	176		110	161		111	181		112	171		111	163		108	164		113	198		115	191		124	175		113
	123	209		115	191		124	233		128	180		119	180		130	257		120	203		119	184		110	161		110	182		116	181		110	179		104	152		116	201		123	201		121	180		117
	123	209		115	191		124	225		133	217		114	192		144	279		119	222		119	184		110	161		110	174		120	181		113	194		110	158		121	220		123	208		123	188		116
	137	225		115	191		137	245		133	217		119	185		144	279		122	216		124	191		110	161		113	181		122	197		113	194		110	164		130	242		126	218		131	205		116
	142	216		115	191		143	283		136	255		129	204		159	316		129	231		129	202		110	161		112	183		125	187		131	222		113	178		124	283		131	222		155	237		131
	147	240		115	191		151	333		161	295		129	203		199	350		147	268		137	229		110	161		116	201		160	220		140	242		110	184		124	283		148	253		198	340		143
	155	271		115	191		173	433		158	340		136	219		232	476		164	308		153	285		110	161		121	204		180	256		169	286		120	230		146	307		156	280		221	351		175
	168	270		115	191		190	446		163	309		152	262		244	489		206	387		153	285		110	161		129	242		180	256		178	285		132	277		158	317		175	297		209	416		230
	190	287		115	191		193	474		163	300		153	305		222	486		224	418		172	308		110	161		142	284		221	304		209	313		144	341		188	321		182	301		217	391		230
	200	298		115	191		190	447		151	289		165	335		200	445		251	474		170	313		110	161		154	310		213	296		215	333		173	393		197	320		191	325		178	364		241
	193	312		115	191		183	432		151	289		191	401		179	431		225	469		173	250		110	161		158	351		199	251		214	299		198	379		186	310		189	320		167	345		260
	193	312		115	191		175	435		146	289		242	437		152	409		210	460		152	215		110	161		172	373		173	233		209	308		186	354		173	302		165	311		138	325		203
	175	273		115	191		172	403		147	257		250	365		141	371		157	424		152	215		110	161		165	388		142	196		168	298		175	302		157	273		161	306		129	315		145
	152	247		115	191		162	394		131	258		212	307		141	365		140	371		139	206		110	161		164	392		129	189		161	285		168	294		143	260		144	294		129	306		128
	139	265		115	191		162	374		130	242		210	267		139	357		129	359		126	208		110	161		165	365		116	196		161	285		144	290		132	275		131	303		117	303		119
	127	246		115	191		170	422		126	251		161	225		145	324		123	349		125	193		110	161		147	325		112	195		146	263		144	290		126	270		125	293		129	288		109
	127	246		115	191		187	420		116	235		127	227		150	379		120	366		116	198		110	161		147	325		112	189		125	268		131	275		121	275		127	314		114	291		109
	133	231		115	191		239	472		113	257		127	227		150	379		129	344		116	198		110	161		129	292		110	188		119	275		116	255		112	273		116	321		115	293		111
	122	246		115	191		232	502		117	259		128	229		152	412		133	352		111	206		110	161		119	302		111	188		118	256		114	259		114	261		117	324		115	287		107
	116	235		115	191		241	486		121	255		127	275		148	469		135	357		108	217		110	161		116	291		106	191		120	260		119	279		114	284		123	316		120	294		105
	124	230		115	191		194	369		121	257		119	253		173	449		141	343		106	217		110	161		119	323		104	190		118	302		125	293		108	278		118	316		115	294		109
	124	230		115	191		180	320		119	281		122	247		172	487		136	348		106	217		110	161		120	312		103	189		123	316		128	304		116	265		117	307		113	268		107
	117	222		115	191		151	290		119	251		117	250		179	511		128	345		108	209		110	161		121	330		106	186		123	316		127	294		113	288		118	285		118	288		109
	115	247		115	191		130	224		128	286		118	244		183	452		143	347		106	228		110	161		126	276		111	181		113	308		127	326		116	277		127	297		115	287		109
	115	261		115	191		122	228		133	257		120	249		176	428		154	323		110	227		110	161		121	308		106	199		126	317		136	348		112	284		126	303		116	295		104
	114	245		115	191		117	204		137	287		120	249		166	383		173	354		108	229		110	161		129	277		108	187		126	317		139	390		110	278		141	286		119	301		104
	117	236		115	191		124	222		147	270		117	243		155	275		199	360		108	229		110	161		135	307		105	200		133	324		152	418		116	282		153	299		113	309		109
	114	239		115	191		117	210		159	312		115	238		142	258		212	384		104	225		110	161		153	286		111	193		137	346		141	384		114	272		165	345		123	312		110
	117	254		115	191		116	203		165	356		117	241		128	204		212	384		116	212		110	161		164	321		112	198		136	347		160	398		111	261		176	393		127	328		111
	116	257		115	191		115	201		177	373		121	234		122	198		201	348		110	244		110	161		180	343		107	202		143	361		180	404		115	274		176	393		127	328		111
	117	241		115	191					159	349		117	244		109	201		181	371		110	228		110	161		180	343		108	192		160	426		184	369		118	287		169	433		140	321		109
	118	243		115	191					160	331		114	227		114	182		154	299		110	228		110	161		181	307		105	193		154	412		161	268		112	265		153	426		134	331		112
	123	253		115	191					142	305		115	231		116	195		140	289		107	232		110	161		183	334		108	189		172	402		142	225		115	272		145	426		154	333		107
	112	276		115	191					134	271		115	231		113	185		121	218		106	238		110	161		156	284		109	195		180	369		137	194		116	245		131	401		158	326		109
	115	276		115	191					128	208		119	233					121	218		109	227		110	161		140	266		110	186		163	340		125	171		114	271		132	369		166	343		109
	115	276		115	191					120	190		116	233					115	201		102	231		110	161		120	225		106	188		149	279		115	177		120	265		121	323		166	343		105
	118	259		115	191					118	183		115	266					115	196		108	234		110	161		113	195		107	177		149	279		118	166		120	265		118	307		170	349		106
	120	261		115	191					113	181		118	240					116	192		110	239		110	161		113	193		112	184		143	215		114	171		123	254		118	273		154	317		107
	118	268		115	191					112	178		116	221					113	187		112	222		110	161		111	183		109	188		125	198		113	168		127	252		113	248		138	269		105
	114	269		115	191					110	178		125	237					114	189		104	226		110	161		111	178		107	182		121	187		109	162		119	261		115	208		135	230		109
	114	269		115	191					111	169		115	229					112	182		102	208		110	161		109	169		109	180		118	179					125	296		111	187		124	183		105
	118	263		115	191								112	242								112	210		110	161		109	170		107	181		119	183					132	324		109	169		113	172		107
	118	247		122	210								114	216								105	210		106	172					116	187		111	165					148	321		104	158		114	163		109
	118	279		119	210								119	222								109	223		109	162					111	187		110	165					156	274		109	169		109	154		103
	120	261		116	211								114	243								108	207								107	175								147	233					109	154		109
	122	297		127	212								116	263								107	208								106	183								153	194								101
	123	293		119	201								119	225								105	225								110	184								141	171								105
	124	293		116	214								115	252								105	209								105	189								121	164								99
	122	270		120	218								113	242								106	199								105	189								120	164								104
	127	264		119	207								120	225								107	213								108	187								112	163								109
	118	278		115	209								120	225								104	203								109	193								115	157								105
	123	275		116	221								119	212								105	212								104	188								106	164								104
	126	295		118	217								118	212								107	209								110	176								108	152								104
	120	277		116	206								118	215								107	218								109	197																	110
	119	254		121	215								116	209								107	218								114	182																	105
	117	260		120	210								115	208								106	200								107	200																	105
	122	264		119	224								121	205								107	208								105	193																	104
	117	259		113	207								115	217								110	199								109	201																	106
	117	264		115	209								115	217								102	193								110	192																	105
	121	256		119	220								114	226								102	193								107	194																	108
	118	273		116	221								116	215								105	184								113	198																	108
	128	262		125	216								117	234								104	194								115	188																	107
	124	259		121	208								116	215								106	191								109	208																	109
	119	250		113	211								115	220								105	184								106	210																	105
	120	258		119	209								118	235								105	184								109	199																	108
	120	259		115	203								107	234								106	181								109	195																	108
	122	243		119	211								107	234								104	179								109	199																	107
	124	252		116	218								111	226								108	189								112	193																	104
	121	254		123	207								109	223								110	176								110	189																	103
	133	259		120	209								112	242								110	176								108	203																	109
	130	259		118	209								112	217								105	185								106	196																	104
	143	264		120	207								110	222								106	192								110	197																	108
	149	276		119	213								109	235								109	197								114	197																	104
	183	283		119	213								112	238								105	189								109	210																	104
	207	331		116	203								109	211								107	180								109	203																	104
	261	366		120	196								114	236								108	188								115	206																	108
	263	398		123	208								111	233								103	185								112	209																	105
	307	416		118	221								115	236								110	204								112	199																	107
	285	337		116	202								119	249								111	196								109	209																	105
	243	274		121	204								112	220								109	195								112	222																	108
	167	224		117	212								111	246								107	185								114	215																	109
	142	223		120	218								112	250								106	190								106	219																	109
	132	225		122	211								119	254								107	204								107	211																	109
	131	224		125	209								119	254								106	189								110	208																	107
	123	220		123	206								116	244								109	191								114	208																	102
	120	211		120	216								115	250								106	189								109	225																	111
	119	198		117	212								114	278								109	197								115	214																	111
				116	215								120	255								107	185								112	209																	110
				121	211								111	277								102	190								115	201																	106
				121	204								117	285								105	197								115	201																	109
				117	226								117	295								112	193								119	203																	109
				118	208								117	295								108	190								111	213																	109
				119	204								120	258								102	187								112	201																	106
				118	203								115	254								110	185								113	206																	109
				113	210								114	255								110	204								114	215																	101
				115	204								119	250								112	190								109	213																	111
				119	202								116	231								112	207								111	224																	111
				123	207								115	246								111	201								118	222																	109
				115	217								113	229								122	210								121	210																	111
				119	207								113	229								125	216								120	215																	103
				116	220								114	240								124	227								129	209																	106
				114	205								112	233								130	229								135	217																	110
				121	209								114	242								145	253								193	240																	106
				118	207								113	245								207	311								242	319																	110
				118	211								115	227								228	350								275	343																	106
				120	223								115	241								222	304								258	342																	109
				115	210								120	243								222	304								184	275																	104
				119	221								119	231								173	207								163	238																	107
				120	214								122	247								143	196								128	207																	106
				116	227								126	244								126	179								128	207																	104
				114	222								126	250								120	175								112	184																	104
				123	226								132	268								120	175								113	180																	109
				123	230								141	274								117	175								112	174																	109
				118	231								157	276																	113	176																	103
				118	231								202	303																	113	178																	108
				119	228								250	359																	110	188																	110
				118	222								250	359																																			108
				114	217								288	368																																			108
				122	219								259	285																																			107
				118	222								229	243																																			103
				117	217								170	214																																			107
				122	235								156	209																																			108
				117	222								131	194																																			108
				117	210								123	197																																			108
				114	232								123	197																																			108
				121	214								124	194																																			109
				119	236								124	181																																			110
				120	242								122	173																																			110
				122	247																																												110
				118	247																																												120
				127	241																																												133
				129	247																																												137
				144	274																																												170
				142	295																																												181
				159	327																																												207
				208	342																																												220
				262	330																																												206
				316	281																																												149
				354	291																																												149
				297	233																																												121
				228	227																																												118
				167	220																																												107
				141	213																																												105
				128	215																																												105
				120	204																																												105
				116	206
				125	196
				120	204
[truncated: 33 more columns]

## Sheet: Ndc80 null
Each Mtw1-YFP and Dad4-CFP pair represent intensities for one pixel (60 nm)
Ndc80 null
Cell #	1			2			3			4			5			6			7			8			9			10			11			12			13			14			15			16			17
	Mtw1-YFP intensity	Dad4-CFP intensity		Mtw1-YFP intensity	Dad4-CFP intensity		Mtw1-YFP intensity	Dad4-CFP intensity		Mtw1-YFP intensity	Dad4-CFP intensity		Mtw1-YFP intensity	Dad4-CFP intensity		Mtw1-YFP intensity	Dad4-CFP intensity		Mtw1-YFP intensity	Dad4-CFP intensity		Mtw1-YFP intensity	Dad4-CFP intensity		Mtw1-YFP intensity	Dad4-CFP intensity		Mtw1-YFP intensity	Dad4-CFP intensity		Mtw1-YFP intensity	Dad4-CFP intensity		Mtw1-YFP intensity	Dad4-CFP intensity		Mtw1-YFP intensity	Dad4-CFP intensity		Mtw1-YFP intensity	Dad4-CFP intensity		Mtw1-YFP intensity	Dad4-CFP intensity		Mtw1-YFP intensity	Dad4-CFP intensity		Mtw1-YFP intensity
	121	222		124	332		122	234		124	288		128	192		124	281		121	294		131	238		111	200		108	162		104	152		115	223		112	141		123	215		117	200		126	206		119
	124	222		128	352		123	231		120	285		131	197		120	265		124	297		126	235		109	193		108	167		106	147		120	231		107	137		121	212		118	202		125	210		115
	117	229		122	336		127	251		117	288		135	207		128	280		120	320		125	236		112	213		111	162		108	153		118	229		112	141		116	213		114	191		121	216		121
	122	242		124	353		123	234		117	288		139	228		123	278		129	324		122	235		112	213		109	168		107	154		113	238		111	137		116	209		120	193		128	221		120
	122	242		126	336		135	253		123	287		142	261		125	275		124	321		132	232		108	205		111	162		102	161		112	248		110	154		116	205		119	199		125	224		118
	128	247		131	322		135	253		120	305		145	284		122	274		126	310		130	239		108	215		107	175		106	157		113	251		114	147		119	211		121	192		126	235		118
	126	247		127	308		135	259		120	305		165	352		127	296		123	319		130	239		114	200		103	181		109	163		114	258		111	161		117	204		120	200		122	241		120
	120	245		127	308		129	247		119	289		161	385		129	309		125	292		126	244		116	208		106	188		112	158		117	278		106	157		117	204		126	206		121	243		119
	130	270		120	331		134	283		123	297		189	436		126	288		125	314		135	244		117	217		112	196		106	168		119	286		109	175		119	221		119	190		126	250		118
	124	302		131	327		141	343		123	297		189	436		124	304		129	294		127	242		112	222		106	215		112	166		127	309		108	176		118	226		120	195		124	264		121
	125	354		126	341		143	397		121	310		193	464		125	353		126	325		136	245		115	205		111	227		110	188		135	328		110	177		120	235		116	216		119	267		121
	127	402		128	332		146	458		115	305		198	444		121	344		130	304		127	239		112	212		111	232		113	201		118	341		107	181		122	247		120	214		132	280		121
	126	450		127	340		155	489		119	321		198	468		125	320		128	321		131	244		119	216		107	265		117	223		117	386		111	180		113	236		120	212		126	292		113
	132	468		131	341		147	485		115	313		187	431		126	313		122	332		127	235		115	222		112	281		127	239		120	390		111	186		113	236		119	210		127	289		120
	130	486		125	366		154	545		114	353		166	438		124	317		122	332		129	245		108	217		107	306		122	248		126	359		116	179		119	259		116	226		134	297		119
	132	487		130	386		144	548		122	337		169	431		118	299		120	318		128	224		116	228		112	330		131	272		120	378		114	188		119	246		126	231		131	312		120
	143	489		125	364		143	574		121	353		159	410		125	277		121	333		128	224		117	223		108	318		125	274		121	328		114	185		117	266		123	253		133	323		118
	137	513		127	384		158	525		117	354		169	435		120	267		121	310		138	227		117	223		106	328		126	286		121	328		117	193		114	255		117	227		124	293		121
	139	505		121	379		151	516		117	349		166	427		121	291		126	312		126	232		114	235		112	314		126	270		115	326		117	193		121	268		130	255		134	311		126
	138	514		126	348		197	549		117	371		174	450		127	283		116	308		127	230		117	236		110	295		132	300		120	314		111	197		121	268		119	235		140	311		121
	137	524		126	348		197	549		123	369		166	446		127	283		122	295		129	239		122	242		114	296		132	312		123	313		113	201		115	264		120	260		133	310		118
	143	553		124	335		192	569		115	350		161	471		122	267		121	300		130	237		117	252		110	294		136	302		125	315		110	200		118	293		127	245		137	290		124
	142	521		126	369		194	528		115	350		170	476		120	292		121	307		128	235		124	240		107	293		128	283		126	283		113	208		117	308		117	291		136	315		124
	143	547		124	341		177	566		116	325		170	476		125	276		119	301		124	231		125	261		109	281		130	281		125	280		116	206		114	307		123	264		144	317		124
	141	525		129	312		169	538		112	294		165	437		120	284		120	314		127	235		122	247		115	294		142	296		120	281		109	212		116	327		123	282		144	317		116
	154	533		125	336		165	524		112	294		163	424		122	293		120	314		123	241		118	250		117	273		132	305		113	258		113	222		118	338		121	310		136	329		127
	164	537		129	319		165	535		117	278		166	411		134	281		116	283		125	235		126	263		116	284		138	301		120	244		115	225		118	338		121	292		139	331		124
	165	524		131	356		169	495		119	232		162	383		121	281		120	273		132	227		122	285		114	275		134	287		111	243		111	213		128	356		128	344		146	316		123
	165	524		127	338		173	491		119	232		169	401		126	284		120	259		124	232		117	261		118	280		136	293		118	239		114	235		116	340		118	330		142	332		121
	162	526		127	315		191	504		114	235		190	402		126	301		117	279		124	232		121	281		115	284		136	293		116	242		116	253		116	361		123	355		138	334		123
	159	540		125	334		184	519		114	222		220	402		136	304		119	274		120	226		123	289		118	277		131	308		120	246		120	246		116	342		122	326		147	332		123
	152	486		129	301		177	500		119	216		244	405		133	285		121	239		123	218		123	289		117	284		132	329		120	236		118	238		115	351		128	371		142	319		120
	147	511		133	288		173	485		110	210		228	365		133	289		126	252		119	222		123	272		122	266		126	313		118	229		111	260		115	351		128	371		145	326		124
	141	449		133	288		164	485		113	211		200	308		131	299		118	244		116	217		115	304		121	270		131	290		118	222		114	248		117	369		127	432		144	315		121
	131	427		126	288		147	461		114	230		166	273		127	310		120	245		123	219		121	298		120	274		126	299		113	213		114	249		118	381		122	412		145	333		128
	142	399		126	303		140	471		111	226		145	259		132	304		119	224		116	220		129	311		133	269		134	301		114	202		118	266		118	388		129	430		139	330		122
	130	368		123	288		151	416		111	227		144	248		138	323		123	225					128	299		129	251		133	276		116	200		121	271		123	386		124	473		134	330		125
	134	352		123	298		145	419		111	245		138	240		149	322		122	223					128	299		127	267		130	278		106	196		109	283		118	454		125	386		133	342		117
	131	342		123	298		147	396		119	236		138	240		144	312		115	228					120	295		125	248		127	286		106	196		109	283		118	454		125	460		128	312		128
	134	325		128	275		141	368		114	245		133	227		149	291		119	233					120	311		126	247		128	296		115	203		116	279		121	473		127	403		133	329		120
	140	304		134	283		154	388		116	252		129	230		150	300		115	220					116	302		133	237		133	288		115	194		111	297		121	452		128	393		144	318		127
	129	288		126	275		152	349		110	271					149	273		116	217					117	312		120	228		128	279		110	193		117	328		120	450		120	340		145	370		124
	133	282		127	262		139	360		116	296					133	251		118	222					115	302		125	230		130	267		115	195		113	314		114	425		126	306		147	360		118
	137	275		126	260		141	340		115	303					132	251		116	214					122	352		125	226		131	258		113	199		116	310		122	389		126	306		137	352		122
	130	262		126	248		149	331		114	304					131	249		121	211					122	313		122	221		137	269		111	191		113	333		122	389		130	293		142	358		120
	145	277		124	248		139	308		118	284					129	237		114	212					123	337		124	234		131	252		113	190		121	349		115	343		128	273		129	355		119
	130	268		127	228		152	317		111	298					129	227								127	315		124	234		137	261		113	193		116	347		121	324		132	283		133	358		125
	138	270		123	220		148	282		111	286					131	248								123	348		126	223		139	262					118	370		115	282		132	267		131	362		125
	144	252		121	217		139	282		116	278					131	244								121	328		127	214		135	269					124	392		118	294		136	255		126	372		126
	136	259		122	224		140	278		120	273					128	243								128	360		117	213		132	254					114	416		121	296		131	272		121	371		119
	137	257		121	231		131	272		115	254														121	351		117	215		127	248					120	386		117	294					130	385		121
				124	232		135	273		112	247														121	351		118	210		136	268					117	370		122	274					130	381		118
				118	227		129	259		109	250														121	353		122	218		130	268					123	388		119	277					133	371		126
				120	223					121	216														125	390		123	207		129	254					115	388		123	276					134	372		118
				120	211					121	216														116	365		119	201		131	256					120	397		125	289					135	370		123
										117	221														118	392		117	212		119	240					120	348		120	263					138	370		123
										109	209														122	380		115	208		124	242					125	313		125	273					153	376		119
										112	206														120	376		119	208		123	251					121	268								142	399		117
										115	185														121	333		119	219		117	245					121	268								147	393		114
										110	174														116	359		118	209		119	233					121	232								140	404		119
										109	170														126	349		118	215		125	237					120	188								144	413		114
										112	163														122	359		116	222		116	237					117	185								138	393
										107	165														116	344		119	206		118	234					118	184								131	392
										108	160														119	364		115	203		114	243					126	170								136	398
										109	155														123	362		121	204		118	227					117	174								139	412
										112	152														123	362		114	208		113	209					119	160								133	387
										110	151														128	347		118	203		117	234														127	384
										110	153														128	376		117	203		118	247														130	392
																									119	329		114	207		114	241														138	369
																									122	346		121	222		121	230														143	378
																									119	363		121	208		114	228														155	387
																									114	332		116	204		114	221														156	374
																									116	312		122	212		119	237														150	379
																									120	308		128	222		115	219														150	379
																									125	304		128	218		114	217														139	392
																									123	284		134	219		116	215														132	375
																									122	292		128	231		120	213														128	359
																									119	267		132	220		122	219														123	344
																									118	274		125	233		122	207														121	363
																									118	274		125	238		122	214														118	372
																									119	277		124	242		113	220														119	350
																									114	247		127	250		114	206														120	361
																									118	261		125	249		119	208														124	343
																												129	260		111	195														123	351
																												135	260		112	212														115	328
																												128	248		117	204														118	316
																												119	273		119	202														119	299
																												121	256		117	204														125	281
																												131	271		121	203														121	265
																												125	281		121	203														119	260
																												127	262		118	204														122	251
																												127	262		112	214														126	240
																												135	269		126	188														116	249
																												129	278		120	198														124	234
																												135	274		122	193														120	233
																												135	286		117	188														130	239
																												127	279		117	199														126	226
																												130	276		121	199														131	235
																												138	271		118	209														130	224
																												144	280		120	202														127	227
																												148	278		125	195														123	210
																												144	287		121	195														132	239
																												140	291		120	191														126	230
																												132	292		118	189
																												138	275		116	187
																												135	276		114	180
																												121	263		118	189
																												116	241		117	178
																												116	210		117	187
																												115	207		116	195
																												115	191		112	177
																												116	177		114	187
																												117	174		113	180
																												111	165		113	181
																												112	164		107	181
																												108	161		111	184
																												106	158		113	180
																												113	150		115	191
																															116	191
																															118	192
																															114	185
																															111	187
																															118	192
																															117	197
																															117	191
																															115	200
																															119	193
																															120	191
																															116	200
																															112	196
																															113	197
																															114	205
																															122	195
																															121	212
																															115	202
																															112	203
																															113	205
																															116	221
																															118	207
																															111	215
																															117	218
																															121	212
																															113	219
																															109	210
																															114	212
																															113	205
																															111	222
																															113	217
																															113	220
																															108	211
																															110	214
																															107	210
																															111	205
																															111	222
																															116	207
																															115	203
																															115	204
																															113	214
																															116	209
																															114	207
																															116	215
																															116	200
																															113	195
																															114	209
																															114	209
																															113	197
																															116	192
																															113	201
																															117	188
																															115	193
																															123	198
																															115	192
																															123	194
																															114	190
																															119	186
																															117	193
																															119	185
																															120	195
																															117	192
																															116	183
																															112	191
																															114	184
																															109	186
																															118	182
																															112	184
																															116	166
																															113	174
																															110	177
																															110	179
																															116	177
																															112	176
																															112	161
																															111	166
																															115	162
																															113	166
																															109	170
																															109	164
																															106	156
																															111	162
																															110	155
																															107	154
																															104	166
																															107	150
																															103	153
																															105	149
																															105	143
																															102	150
[truncated: 29 more columns]

## Sheet: Ndc80 mut A
Each Mtw1-YFP and Dad4-CFP pair represent intensities for one pixel (60 nm)
Ndc80 mut A
Cell #	1			2			3			4			5			6			7			8			9			10			11			12			13			14			15			16			17
	Mtw1-YFP intensity	Dad4-CFP intensity		Mtw1-YFP intensity	Dad4-CFP intensity		Mtw1-YFP intensity	Dad4-CFP intensity		Mtw1-YFP intensity	Dad4-CFP intensity		Mtw1-YFP intensity	Dad4-CFP intensity		Mtw1-YFP intensity	Dad4-CFP intensity		Mtw1-YFP intensity	Dad4-CFP intensity		Mtw1-YFP intensity	Dad4-CFP intensity		Mtw1-YFP intensity	Dad4-CFP intensity		Mtw1-YFP intensity	Dad4-CFP intensity		Mtw1-YFP intensity	Dad4-CFP intensity		Mtw1-YFP intensity	Dad4-CFP intensity		Mtw1-YFP intensity	Dad4-CFP intensity		Mtw1-YFP intensity	Dad4-CFP intensity		Mtw1-YFP intensity	Dad4-CFP intensity		Mtw1-YFP intensity	Dad4-CFP intensity		Mtw1-YFP intensity
	127	222		112	202		118	205		115	201		114	178		130	226		116	199		115	187		114	187		110	157		107	164		144	417		128	291		115	181		131	248		114	175		123
	123	218		121	207		119	209		121	192		114	178		127	221		124	203		117	187		115	181		107	165		113	159		150	413		123	307		112	182		125	258		115	174		125
	123	218		125	202		119	204		121	192		114	181		126	218		122	212		115	188		114	193		110	177		115	177		151	387		129	357		114	183		130	255		113	177		122
	121	221		121	208		117	207		116	201		114	179		125	221		117	194		114	186		121	203		103	167		115	160		158	419		128	329		111	194		136	247		115	175		119
	125	220		117	208		120	200		117	199		116	182		128	219		117	200		115	191		121	203		108	175		114	167		156	422		118	308		114	186		135	260		115	174		125
	128	223		116	208		118	209		122	203		115	185		128	219		125	189		118	187		128	220		110	171		113	167		150	416		121	295		123	196		138	252		116	175		120
	125	233		116	208		121	218		123	207		115	187		123	223		122	193		117	193		129	251		107	176		120	183		141	399		116	252		124	195		132	265		116	177		120
	126	230		113	212		119	215		121	203		117	186		125	231		126	200		116	193		129	251		115	183		120	183		139	345		117	249		124	224		132	265		117	177		118
	129	242		122	206		126	210		120	211		116	188		125	227		123	207		119	192		129	288		109	183		117	201		138	313		117	236		123	238		133	291		117	180		119
	124	272		121	222		122	193		118	212		115	188		127	231		125	238		119	194		133	304		110	187		129	216		131	249		116	219		127	250		133	284		117	180		119
	133	329		120	219		120	209		120	222		116	188		124	235		124	232		118	197		141	310		114	187		134	275		118	223		115	211		131	287		133	354		116	181		124
	126	387		120	218		122	218		123	251		117	186		126	248		135	257		116	197		139	348		107	194		120	296		118	223		114	206		123	298		162	422		115	180		123
	125	390		123	225		113	206		121	232		115	189		122	259		124	275		120	206		134	332		110	187		120	296		120	215		111	205		129	294		155	551		116	181		129
	125	433		113	239		121	214		125	235		115	190		124	248		136	320		119	209		142	324		113	189		125	308		113	196		113	198		127	310		163	599		116	181		123
	124	437		113	239		118	216		125	219		115	185		124	249		136	320		119	209		142	323		110	189		123	306		118	197		113	197		135	301		159	591		115	181		129
	133	401		113	242		114	221		122	209		116	186		119	262		138	339		118	211		132	317		108	194		120	324		114	189		115	196		136	300		163	652		115	181		130
	126	407		119	261		117	222		122	209		116	185		121	250		145	331		120	212		134	310		107	187		122	326		113	186		113	191		136	302		148	583		116	183		125
	129	381		115	259		118	213		123	204		118	186		126	243		132	334		119	211		128	296		108	190		124	322		113	188		110	183		144	290		171	629		115	181		136
	127	410		113	246		122	217		120	208		115	192		123	266		139	334		118	209		131	310		107	183		123	322		112	193		111	188		136	300		162	628		117	185		131
	131	387		115	236		122	227		125	213		117	189		119	250		145	351		117	213		126	282		111	184		123	332		111	180		111	188		136	286		162	628		116	185		132
	127	400		116	247		121	219		119	220		117	191		119	250		141	341		119	209		124	286		109	202		123	332		114	185		110	191		140	288		174	633		117	187		126
	127	389		114	238		117	232		118	202		118	192		124	248		157	357		119	211		122	279		110	204		124	316		114	180		110	183		136	290		161	581		116	185		130
	128	377		116	247		122	238		118	202		116	186		124	248		157	357		117	207		125	285		112	180		120	319		110	190		110	188		142	298		173	553		116	185		126
	124	355		116	258		117	218		121	207		119	187		119	235		151	347		116	213		121	280		110	187		129	301		116	187		117	175		134	300		181	549		115	186		126
	128	363		114	251		124	217		116	208		119	183		124	250		147	342		117	209		127	284		109	187		118	297		113	193		113	176		126	318		208	498		116	188		128
	128	363		119	246		117	222		116	198		119	189		121	250		151	329		119	205		127	284		111	188		118	297		112	186		112	184		128	304		240	555		115	188		127
	123	340		119	246		124	227		124	205		117	189		116	249		149	343		117	207		129	281		110	184		116	282		115	188		114	180		125	301		263	512		115	187		123
	119	311		118	238		117	217		118	215		119	186		114	254		152	333		120	206		127	283		108	188		121	296		112	189		109	183		116	282		237	534		117	186		119
	124	329		111	242		127	219		114	208		118	187		119	247		151	301		119	209		127	283		110	188		123	290		113	196		112	175		115	305		232	492		117	186		122
	121	313		120	243		126	222		119	216		117	186		125	261		151	301		122	205		121	281		109	194		120	267		112	196		105	185		118	315		209	449		116	190		121
	121	303		117	258		133	228		119	198		117	185		116	235		144	311		122	205		122	284		111	187		123	284		109	199		115	182		120	297		206	453		117	194		123
	117	291		119	228		130	231		120	201		115	186		124	241		135	299		121	208		119	284		107	187		118	304		111	188		113	178		115	296		216	435		118	193		120
	115	273		113	251		130	231		119	209		117	185		115	245		135	310		123	208		116	274		113	180		121	313		113	185		111	184		112	296		191	416		120	195		126
	118	270		119	252		131	230		118	206		115	187		118	255		135	281		123	208		122	266		113	180		112	302		113	186		112	178		109	284		192	385		120	198		123
	117	257		119	252		128	230		120	215		115	183		119	245		141	281		122	211		119	263		110	183		119	293		114	193		112	171		115	271		183	373		118	197		124
	121	265		121	250		125	228		121	214		118	185		121	279		139	261		122	212		118	258		111	180		115	296		110	198		108	183		120	273		176	355		117	195
	117	275		117	248		121	248		121	214		116	182		118	267		140	267		124	208		120	244		106	187		120	304		113	183		103	185		117	283		161	333		118	194
	118	244		116	220		123	237		119	217		117	185		118	282		129	266		124	208		118	249		109	176		119	306		114	188		112	172		112	284		157	330		117	192
	114	268		114	231		124	255		122	213		116	180		118	282		135	268		125	209		118	246		103	183		119	306		118	196		112	180		116	276		150	347		117	193
	123	244		118	225		124	246		122	205		116	182		124	302		131	248		126	213		113	252		109	183		124	299		118	196		111	184		116	271		140	336		117	195
	109	244		120	229		116	238		124	218		116	182		122	308		129	253		126	213		118	236		112	184		123	309		111	196		115	174		123	276		142	348		119	196
	116	238		120	229		114	246		126	216		117	183		126	308		129	255		125	209		120	236		109	186		144	312		120	195		109	180		119	285		147	346		118	196
	118	226		120	229		119	229		126	216		117	183		130	355		126	243		123	214		118	251		114	178		136	314		121	193		109	175		113	285		147	338		116	203
	118	237		120	237		119	233		126	228		118	185		121	350		126	243		123	214		119	226		107	186		136	314		115	201		117	176		111	284		143	344		118	202
	121	236		122	249		114	243		121	225		118	183		129	395		121	267		123	213		121	233		109	179		134	318		121	206		117	180		116	304		157	338		119	203
	115	243		117	233		119	234		126	231		118	184		119	407		129	247		120	214		113	244		107	180		127	317		115	204		104	175		119	287		166	324		118	203
	121	225		113	242		119	245		128	234		119	182		119	407		122	237		121	211		113	244		105	195		127	316		118	203		113	176		112	300		163	346		121	207
	121	225		118	249		118	240		124	239		122	183		126	381		127	242		120	213		124	248		106	181		126	300		123	199		110	184		113	288		148	316		120	207
	111	244		119	231		116	260		117	243		123	181		123	429		121	247		119	216		116	231		110	196		123	293		115	224		112	186		116	307		149	302		120	207
	119	246		123	225		116	246		125	247		124	185		129	431		123	246		119	218		116	231		110	195		132	290		122	226		114	183		119	322		143	300		122	211
	121	249		124	240		116	252		124	255		126	183		136	465		123	237		119	218		123	257		108	196		125	268		117	212		111	189		119	325		139	296		125	206
	121	236		123	242		117	241		124	273		127	185		129	407		127	221		121	213		123	259		108	193		126	249		120	221		111	189		128	305		140	295		125	212
	111	239		134	238		113	245		123	293		130	188		140	445		118	243		118	214		124	248		115	190		132	221		119	225		115	189		125	294		138	302		123	211
	120	241		122	236		124	239		131	315		130	189		140	464		117	245		119	211		120	280		108	199		123	229		117	224		111	177		125	294		138	302		122	214
	118	252		124	254		115	250		139	315		129	194		136	383		124	230		117	212		125	258		108	199		118	217		118	216		112	182		136	307		147	282		122	214
	122	241		124	251		120	246		130	350		122	197		136	383		122	226		116	206		123	268		111	207		118	209		118	210		107	178		138	283		153	272		121	218
	118	233		122	247		118	241		130	350		120	197		141	348		118	219		115	200		120	283		112	200		118	209		118	228		109	192		161	264		154	288		121	226
	118	257		115	254		114	252		132	405		118	197		134	333		119	237		115	203		124	277		110	212		110	201		114	217		118	173		160	270		163	292		121	232
	119	247		120	263		116	237		141	396		116	201		138	295		117	214		115	187		121	283		117	222		115	200					109	183		155	263		155	306		123	238
	114	257		116	265		120	247		148	460		117	200		146	301		121	219		113	183		124	286		116	221		112	192					113	190		145	262		140	297		125	242
	117	245		123	271		125	234		146	388		116	200		140	270		120	200		113	172		124	285		122	215		116	195					109	186		138	255		142	301		126	247
	119	241		122	266		117	235		139	406		117	202		151	261		122	207		113	171		118	313		129	239		116	195					107	190		130	261		141	287		125	246
	117	256		122	266		119	234		152	345		116	205		141	257		121	213		113	171		119	300		143	250		111	189					116	195		126	269		128	291		125	250
	120	233		126	266		120	241		144	346		115	205		141	257		114	208		112	170		118	284		151	241								106	183		129	274		132	288		125	255
	122	251		122	256		114	230		143	322		116	207		138	257		117	203		112	170		118	284		146	249								116	196		134	257		126	263		124	260
	117	242		118	259		120	244		142	251		116	208		136	255		117	203		113	164		121	273		131	247								114	187		140	268		126	263		123	259
	121	239		122	273		116	246		141	244		118	211		130	264		117	205		112	166		116	273		118	255								112	185		130	241		130	267		122	261
	116	244		120	268		115	246		128	230		116	216					116	207		113	166		113	261		117	258								115	197		127	230		131	281		122	261
	114	232		126	282		112	243		127	234		115	217					117	202		110	164		118	245		114	248								118	191		123	208		128	278		124	260
	119	236		127	271		115	253		129	229		116	221					121	221		112	161		114	238		120	242								116	189		121	196		138	260		124	260
	115	240		127	271		118	259					118	224					123	209		111	163		115	227		111	250								117	180		122	193		130	260		124	262
	117	238		118	282		118	242					118	228					123	211								112	243								115	195		120	192		133	280		125	261
	115	233		128	291		118	262					119	229					120	202								109	233								116	189		115	178		131	269		123	264
	114	235		132	271		116	265					117	231					119	205								109	244								119	191		112	186		130	269		122	267
	120	234		129	290		122	259					118	233					119	209								104	239								115	190		112	185		131	275		123	265
	118	249		126	269		118	254					118	231					114	202								107	225								114	203		114	192		131	274		119	272
	116	231		129	284		117	255					116	232					116	202								107	225								113	195		112	177		126	265		119	276
	115	230		119	280		121	250					115	233					122	211								109	232								113	199		115	167		126	265		119	281
	122	235		119	280		114	269					115	234					121	199								112	218								108	192					128	263		120	278
	116	224		130	277		119	264					114	231					121	199								110	211								112	184					130	270		118	279
	116	232		128	271		120	271					116	230					119	201								113	222								115	189					122	286		117	274
	123	251		126	284		120	271					116	226					109	212								111	236								117	194					127	275		117	270
	126	248		124	284		118	288					117	226					117	205								114	225								110	196					125	254		116	257
	121	253		129	280		125	276					120	217					117	203								107	219								111	194					124	256		114	249
	124	253		136	292		116	277					118	210					116	199								110	218								119	199					135	262		115	227
	132	264		130	295		118	276					119	205					123	202								112	221								119	198					127	251		114	218
	119	267		128	293		123	294					116	199					120	194								119	221								122	190					131	272		114	203
	124	290		129	319		118	291					116	193					120	194								124	220								114	196					119	250		114	203
	115	267		123	326		123	288					115	186					119	197								132	219								120	190					119	239		114	197
	117	279		132	321		129	288					114	181					125	185								135	226								118	199					119	250		115	190
	117	278		127	309		129	286					115	184					115	196																	122	204					125	258		115	183
	119	270		127	330		135	317					113	181					115	199																	119	220					128	251		112	181
	122	257		132	324		149	362					113	179					121	196																	126	235					129	257		113	175
	118	269		134	345		153	357					114	175					121	197																	129	246					117	228
	122	257		128	331		171	401					113	174					117	184																	128	243					127	257
	114	258		146	365		176	418					112	179					124	210																	133	254					126	241
	121	236		143	376		166	435											121	197																	124	225					124	241
	122	220		142	404		166	435											123	212																	125	218					123	239
	119	206		142	404		147	420											120	203																	124	209					122	239
	116	218		141	404		144	415											119	200																	118	204					130	233
	118	211		130	338		146	449											114	195																	118	204					128	241
	117	214		133	332		152	456											114	195																	118	202					125	228
	125	206		129	290		142	444											119	203																	115	201					129	243
	117	197		121	283		146	457											123	194																	120	191					123	242
	123	208		118	245		130	411											119	187																	120	191					132	241
				121	228		128	418											115	191																	118	193					126	225
				121	228		129	413											117	196																	115	191					123	229
				115	215		142	400											117	206																	116	184					129	231
				116	216		139	343											124	205																	109	189					126	227
				121	202		133	300											118	205																							122	239
				116	203		131	242											119	204																							127	231
				115	198		125	210											120	208																							127	231
				116	204		128	199											120	198
							125	211											118	208
							125	211											122	193
							121	203											120	203
							119	214											120	212
							119	215											114	224
																			117	201
																			121	214
																			118	214
																			118	217
																			119	229
																			119	229
																			117	225
																			120	230
																			125	224
																			127	240
																			135	248
																			130	249
																			130	249
																			140	255
																			144	260
																			151	242
																			153	242
																			147	251
																			139	233
																			124	227
																			124	218
																			121	220
																			122	209
																			116	209
																			119	205
																			119	204
																			121	198
																			119	201
																			114	203
																			113	201
																			118	195
[truncated: 27 more columns]

## Sheet: Ndc80 mut B
Each Mtw1-YFP and Dad4-CFP pair represent intensities for one pixel (60 nm)
Ndc80 mut B
Cell #	1			2			3			4			5			6			7			8			9			10			11			12			13			14			15			16			17
	Mtw1-YFP intensity	Dad4-CFP intensity		Mtw1-YFP intensity	Dad4-CFP intensity		Mtw1-YFP intensity	Dad4-CFP intensity		Mtw1-YFP intensity	Dad4-CFP intensity		Mtw1-YFP intensity	Dad4-CFP intensity		Mtw1-YFP intensity	Dad4-CFP intensity		Mtw1-YFP intensity	Dad4-CFP intensity		Mtw1-YFP intensity	Dad4-CFP intensity		Mtw1-YFP intensity	Dad4-CFP intensity		Mtw1-YFP intensity	Dad4-CFP intensity		Mtw1-YFP intensity	Dad4-CFP intensity		Mtw1-YFP intensity	Dad4-CFP intensity		Mtw1-YFP intensity	Dad4-CFP intensity		Mtw1-YFP intensity	Dad4-CFP intensity		Mtw1-YFP intensity	Dad4-CFP intensity		Mtw1-YFP intensity	Dad4-CFP intensity		Mtw1-YFP intensity
	112	161		120	169		114	172		116	192		109	210		113	183		114	209		113	179		107	177		105	169		106	156		135	289		117	198		125	278		115	177		111	162		113
	108	169		119	175		116	191		116	199		113	206		111	190		114	210		113	176		104	169		108	176		108	161		128	270		116	198		135	274		113	174		112	162		108
	111	171		121	180		120	181		109	198		110	217		116	197		112	204		113	176		106	174		104	174		105	155		129	289		118	199		127	289		114	179		112	164		112
	109	175		116	179		120	179		116	200		110	209		113	206		118	209		111	185		106	174		106	185		113	163		134	284		118	199		136	309		113	180		112	166		109
	116	182		118	187		122	193		113	209		112	208		113	199		113	207		112	186		114	182		115	180		110	177		129	283		119	200		141	298		114	178		112	166		109
	109	187		121	185		121	189		118	200		114	205		117	205		111	212		114	179		108	173		109	194		114	200		128	282		120	204		145	327		115	178		114	168		110
	110	180		126	224		117	197		113	223		110	196		118	214		113	203		116	199		108	173		116	208		127	213		133	288		119	203		149	377		115	176		114	176		115
	116	197		130	249		119	201		113	223		111	203		118	214		113	220		116	199		106	187		111	191		124	244		133	288		120	203		146	363		114	181		115	186		115
	116	206		140	294		118	213		124	241		118	241		123	237		116	257		116	198		111	203		122	231		141	269		125	299		120	206		152	380		114	182		116	192		113
	115	220		132	378		115	200		122	277		110	253		133	266		119	262		119	206		113	229		134	218		133	277		135	289		121	209		142	315		114	181		117	201		124
	123	225		132	378		120	217		128	295		114	269		139	297		130	357		124	214		107	256		146	251		134	280		135	301		122	214		140	316		114	179		118	215		116
	125	239		146	385		125	244		129	307		109	295		151	310		133	384		125	250		108	290		146	251		129	297		134	323		124	220		144	319		115	180		120	226		124
	125	239		138	438		120	253		133	330		117	308		151	310		138	368		126	257		114	348		151	236		131	306		133	366		124	220		142	302		115	180		121	237		115
	136	244		147	443		126	266		142	364		116	293		135	328		134	405		135	238		117	308		151	248		135	294		133	366		126	224		145	308		115	180		120	241		123
	133	257		150	441		128	288		132	375		132	309		149	329		138	411		149	255		136	329		151	248		144	301		144	387		128	226		152	333		114	186		122	249		114
	141	254		159	416		130	296		142	375		133	297		131	338		142	407		138	248		144	340		142	270		163	308		143	396		126	228		152	346		115	183		123	248		119
	151	267		161	431		135	321		144	392		137	299		130	350		147	436		145	254		143	342		135	286		163	308		136	423		124	224		146	372		115	182		126	247		121
	146	257		170	392		139	342		155	412		140	297		130	350		159	435		151	263		143	342		135	286		162	295		144	409		124	228		150	396		117	182		129	251		129
	146	257		165	398		148	376		155	412		144	313		135	390		163	420		144	290		137	343		133	285		174	280		147	422		124	224		157	411		116	183		130	252		129
	169	261		161	368		156	411		165	419		150	310		141	422		153	463		144	290		131	357		142	288		175	278		151	432		122	219		161	400		116	184		129	255		123
	171	268		177	346		175	432		180	405		138	314		154	431		166	431		134	253		135	346		149	258		146	257		151	433		123	219		183	419		116	183		131	252		123
	172	270		165	344		179	462		168	415		144	314		165	443		170	411		135	256		129	327		149	258		138	249		159	451		123	219		179	428		116	185		130	254		127
	165	259		165	332		179	463		167	408		148	314		172	414		172	366		140	258		148	335		149	279		131	235		168	462		125	221		179	428		116	187		129	247		123
	154	253		157	317		179	463		160	394		148	292		179	387		172	370		136	262		137	359		143	292		122	235		172	433		123	222		170	474		116	186		127	248		121
	147	263		161	341		189	486		160	402		144	282		175	392		157	346		137	252		132	324		143	292		119	230		168	439		121	222		178	511		117	185		129	247		125
	151	255		159	309		192	506		165	389		150	282		185	397		145	344		136	247		125	351		129	313		117	245		179	445		124	227		170	539		116	190		128	242		125
	147	227		153	331		199	533		167	374		147	273		191	386		139	335		139	252		123	345		126	321		118	225		173	420		122	224		171	526		117	187		126	238		116
	144	231		153	331		221	509		189	397		137	275		189	385		132	297		139	252		134	285		126	321		118	230		157	418		124	224		175	545		118	188		126	238		120
	139	229		155	317		251	512		180	382		134	275		189	385		123	297		144	265		134	285		139	324		114	228		158	406		126	229		168	562		118	187		127	236		123
	135	226		154	329		231	489		179	375		123	284		176	385		125	308		144	252		142	284		149	345		115	223		164	426		125	224		150	563		118	191		126	229		120
	135	229		135	317		205	465		186	362		122	283		150	360		127	310		134	250		150	265		163	317		117	230		155	433		125	224		145	595		117	189		126	222		117
	135	229		140	334		171	449		182	384		122	283		144	324		118	305		145	258		153	278		172	313		117	230		161	421		127	229		145	580		118	193		126	221		115
	124	226		136	333		170	461		165	367		131	280		142	303		120	303		145	265		140	272		169	323		114	216		167	412		127	230		145	580		117	190		123	221		115
	130	227		128	345		143	432		165	367		121	289		142	303		130	306		170	275		137	268		150	322		118	221		173	421		129	229		147	517		117	192		126	222		111
	132	210		132	330		137	427		159	370		121	285		151	299		134	292		157	247		132	259		138	301		115	209		182	420		131	235		134	456		117	193		122	210		114
	122	213		127	349		131	410		170	372		117	284		165	313		129	276		169	256		120	238		131	347		115	218		192	425		133	238		131	328		117	193		121	208		114
	119	212		123	337		138	358		155	351		113	292		145	287		129	276		162	281		114	242		126	319		113	196		176	412		137	237		129	308		117	196		120	214		116
	119	212		129	338		125	298		148	346		113	288		133	266		136	264		159	262		117	233		130	331		114	200		176	412		135	238		126	276		118	194		121	213		114
	129	217		123	330		137	253		146	339		113	285		133	266		123	264		127	252		115	235		130	331		117	211		180	389		137	242		129	280		118	195		121	205		115
	124	207		123	328		126	231		126	305		118	286		128	250		124	254		132	270		115	235		128	344		110	211		194	376		137	242		126	260		119	194		122	204		113
	122	195		127	315		122	230		126	305		116	287		126	258		124	251		131	263		119	234		141	353		111	214		182	398		138	240		126	252		118	196		120	204		113
	123	197		130	321		124	212		126	305		110	296		122	263		118	244		137	276		120	233		151	351		111	220		191	401		136	245		126	252		120	197		121	209		112
	121	200		139	314		127	202		122	307		118	276		120	253		127	241		133	271		112	231		140	336		118	214		198	416		135	248		122	266		119	197		121	202		112
	124	208		135	302		125	199		119	292		112	281		119	245		125	259		124	287		118	222		140	336		111	216		198	416		133	249		117	262		121	199		124	203		113
	124	208		127	282		130	196		119	292		119	278		122	251		129	281		125	283		110	222		132	358		115	227		184	406		133	249					121	199		123	205		112
	120	201		127	282		120	193		116	289		119	278		124	241		131	258		124	281		110	228		134	395		114	232		176	397		130	250					122	199		123	213		109
	124	200		139	279		126	186		119	265		108	264		131	240		131	268		120	291		113	233		134	395		115	213		178	412		129	255					121	202		119	211		114
	124	198		126	274					116	286		111	272		123	251		127	283		126	316		114	223		146	397		115	221		174	401		134	250					122	198		120	215		113
	125	191		123	261					117	288		116	282		116	254		125	264		126	316		112	253		146	397		111	235		178	384		131	251					123	199		120	219		112
	129	199		119	224					116	275		116	275		124	255		126	273		136	334		111	228		163	408		114	224		178	384		131	251					124	202		121	224		110
	122	199		120	207					119	280		113	268		126	263		123	273		149	349		110	210		167	381		116	234		172	385		127	251					122	199		118	207		110
	114	200		116	191					122	279		113	267		119	255		122	268		164	337		115	219		182	388		118	221		166	381		128	253					121	205		117	212		109
	126	194		119	186					113	280		111	270		122	255		126	251		167	354		115	219		194	375		109	219		159	406		127	246					124	205		117	212		112
	122	202		114	181					115	266		109	260		123	270		123	239		163	350		114	218		185	346		113	213		152	398		128	244					124	205		116	208		113
	125	201		115	172					115	266		105	272		123	270		124	262		172	362		112	203		155	316		114	238		149	391		125	241					124	206		116	199		116
	123	202		110	175					114	264		113	259		122	260		124	262		156	338		115	214		144	289		113	232		154	376		124	239					125	208		114	192		117
	120	206		112	170					116	258		107	258		124	262		125	256		154	343		110	208		144	249		115	246		150	377		122	244					125	211		114	187		115
	123	197		112	179					116	269		108	252		124	241		132	280		160	345		116	212		144	249		115	246		144	374		122	247					125	211		113	182		117
	123	197		117	166					115	262		112	253		122	244		136	285		160	364		110	208		130	209		117	251		140	368		122	247					125	214		112	175		114
	118	195		112	165					118	239		112	253		122	253		133	297		153	325		112	212		124	197		126	235		150	378		120	242					124	215		113	172		116
	127	216		118	169					118	242		110	246		127	273		128	292		154	339		115	206		118	195		122	257		142	393		120	243					123	216		113	170		115
	121	207		115	170					114	241		113	254		132	254		141	278		143	364		114	205		116	183		124	259		142	395		120	239					123	222		111	169		115
	127	184		116	159					122	240		110	270		130	261		128	296		129	327		113	212		116	183		139	267		146	382		118	245					122	222		112	167		116
	124	198								125	230		112	263		135	262		129	298		118	319		108	212		115	170		141	291		143	403		119	247					123	221		111	167		123
	125	190								122	227		113	240		136	283		133	285		123	295		114	205		115	167		143	269		141	378		119	247					122	222		111	167		124
	125	206								120	233		120	262		144	273		122	282		123	295		109	221		113	162		153	275		143	390		117	244					121	217		111	167		117
	119	204								119	229		117	261		148	298		133	284		114	282		113	206					156	288		144	364		119	246					121	217		111	164		125
	125	203								120	229		122	246		151	345		127	268		122	244		113	219					137	307		141	377		119	246					121	220					118
	121	195								128	215		133	252		152	342		119	249		114	233		115	221					144	308		142	376		118	238					120	218					123
	121	196								133	225		129	245		143	339		125	245		111	210		112	206					152	292		144	363		119	243					120	218					120
	120	199								132	226		128	234		147	325		116	240		114	208		109	204					159	290		138	357		118	234					118	225					118
	121	208								130	220		133	237		134	316		121	231		112	205		112	217					163	284		137	366		116	241					120	222					114
	116	204								129	224		121	225		132	295		118	234		110	201		108	209					164	283		138	317		117	238					118	224					123
	120	210								133	218		117	228		124	290		117	227		114	194		112	211					156	304		138	317		119	236					118	223					121
	122	211								129	212		121	225		125	283		117	227		112	190		106	202					152	348		142	296		117	229					116	223					130
	122	214								122	212		111	219		129	269		120	228		114	194		108	206					158	350		137	306		119	225					116	214					127
	126	207								130	220		116	224		131	233		117	239		109	182		110	214					155	360		135	270		119	225					116	210					120
	121	229								122	196		107	227		127	230		113	232		109	182		110	214					147	345		133	284		118	213					114	204					116
	122	219								125	216		114	216		124	220		116	229		116	188		111	198					139	319		123	274		119	213					114	200					112
	130	232								111	200		114	231		124	220		115	225		112	181		110	198					148	299		123	274		117	204					115	193					113
	130	232								119	194		114	236		125	215								110	202					144	291		136	271		117	200					115	193					109
	128	240								120	206					114	206								108	197					131	330		127	293		116	199					115	194					115
	125	236								116	194					123	200								113	197					142	310		130	277		117	197					114	188					111
	121	246								114	201					115	199								110	204					130	253					117	198					115	187					111
	118	248								110	202					113	201								111	195					122	233					116	197					113	184					112
	130	248								110	198					115	194								112	204					115	203					116	197					114	186					115
	128	254								112	203					116	190								111	203					111	168					116	198					113	185					111
	129	258								109	199					116	196								111	203					113	163					116	197					113	182					112
	127	241								114	198					114	175								111	186					113	171					117	199					114	182					117
	128	233								111	194					111	190								115	197					108	158					117	196					113	181					109
	127	235																							112	209											117	197					114	182					112
	129	229																							108	206																	112	177					111
	124	227																							117	213																							110
	126	254																							116	208																							110
	122	256																							114	227																							110
	127	257																							112	222																							110
	126	262																							113	220																							115
	125	279																							113	218																							112
	122	254																							113	217																							117
	130	271																							110	221																							112
	130	271																							113	233																							111
	130	267																							120	246																							112
	130	267																							118	263																							113
	139	300																							118	263																							116
	147	335																							129	260																							116
	142	332																							130	259																							111
	157	348																							127	252																							111
	153	352																							134	255																							112
	153	388																							127	266
	137	367																							126	263
	137	367																							122	275
	159	390																							118	303
	143	393																							131	327
	159	389																							139	312
	164	354																							144	356
	164	354																							154	374
	133	338																							171	341
	133	295																							175	342
	122	243																							171	356
	123	213																							158	304
	115	207																							164	269
	118	193																							162	252
	121	179																							141	202
	111	167																							132	198
	118	162																							124	184
	115	154																							119	173
	116	166																							118	172
	116	166																							116	160
	110	152																							112	163
	109	156																							111	155
	103	150																							116	156
	110	150
[truncated: 11 more columns]

## Sheet: Ndc08 mut C
Each Mtw1-YFP and Dad4-CFP pair represent intensities for one pixel (60 nm)
Ndc80 mut C
Cell #	1			2			3			4			5			6			7			8			9			10			11			12			13			14			15			16			17
	Mtw1-YFP intensity	Dad4-CFP intensity		Mtw1-YFP intensity	Dad4-CFP intensity		Mtw1-YFP intensity	Dad4-CFP intensity		Mtw1-YFP intensity	Dad4-CFP intensity		Mtw1-YFP intensity	Dad4-CFP intensity		Mtw1-YFP intensity	Dad4-CFP intensity		Mtw1-YFP intensity	Dad4-CFP intensity		Mtw1-YFP intensity	Dad4-CFP intensity		Mtw1-YFP intensity	Dad4-CFP intensity		Mtw1-YFP intensity	Dad4-CFP intensity		Mtw1-YFP intensity	Dad4-CFP intensity		Mtw1-YFP intensity	Dad4-CFP intensity		Mtw1-YFP intensity	Dad4-CFP intensity		Mtw1-YFP intensity	Dad4-CFP intensity		Mtw1-YFP intensity	Dad4-CFP intensity		Mtw1-YFP intensity	Dad4-CFP intensity		Mtw1-YFP intensity
	116	206		121	213		118	178		118	194		109	167		103	153		107	152		103	142		101	156		109	157		103	148		109	151		117	218		123	229		117	193		115	179		110
	116	191		124	202		115	196		118	194		113	165		109	156		102	162		100	147		99	159		103	163		111	152		113	155		114	211		128	238		119	188		113	174		112
	122	185		124	202		115	195		120	205		108	171		108	150		108	162		103	151		101	158		106	162		103	152		111	157		118	209		124	249		118	189		112	192		115
	117	193		128	205		115	195		120	213		112	163		111	157		106	158		109	161		108	153		113	171		111	153		109	164		119	200		124	233		128	194		115	179		115
	115	194		125	215		120	189		124	217		119	170		111	156		108	161		110	154		107	159		108	165		111	166		109	164		120	198		138	234		115	189		116	187		116
	116	192		128	221		119	202		128	209		118	186		104	145		110	160		103	155		107	154		114	182		114	175		113	158		122	208		129	254		119	194		112	202		120
	116	193		131	219		118	195		140	232		117	225		116	167		112	158		108	164		107	164		108	179		111	178		114	174		120	211		132	259		122	204		120	195		123
	110	195		125	213		121	208		152	263		128	260		118	180		111	180		113	182		116	187		113	174		114	195		114	199		124	217		130	252		124	203		117	206		125
	122	207		125	235		121	210		154	274		136	291		122	205		110	183		115	189		129	225		116	173		114	212		121	204		124	221		125	262		121	196		118	209		127
	122	207		128	243		115	250		175	261		154	352		122	205		115	181		118	205		140	249		115	195		118	234		132	273		127	237		134	292		119	210		120	230		148
	127	229		138	257		120	259		175	300		167	340		124	245		120	188		138	228		141	286		115	195		122	289		134	291		125	248		136	319		126	201		134	266		167
	135	273		136	269		134	294		187	296		156	326		130	272		114	191		142	236		144	302		121	209		128	313		137	344		129	263		138	337		130	202		141	321		167
	151	353		151	257		131	354		187	315		150	329		141	267		115	210		156	249		150	320		128	228		132	334		147	347		138	313		149	357		127	237		158	402		156
	159	378		156	264		141	398		162	300		154	338		145	283		121	240		161	253		142	320		137	217		137	376		140	350		134	351		159	413		130	258		158	402		149
	176	388		183	289		140	431		164	321		158	369		139	284		124	248		165	268		144	315		138	233		134	396		147	328		139	373		160	447		129	303		162	471		155
	165	377		190	311		154	482		165	324		169	366		139	264		135	286		160	278		140	311		163	267		156	400		144	337		141	390		159	435		133	337		149	481		156
	170	392		187	335		155	476		169	325		174	380		130	292		135	306		159	279		134	303		154	265		165	410		150	359		151	421		166	444		151	385		158	524		156
	165	385		191	351		168	485		169	325		174	357		135	274		133	331		159	279		126	299		156	268		156	453		160	364		136	418		182	487		174	420		150	508		168
	165	385		200	362		163	510		181	340		180	344		137	272		136	325		173	280		118	299		148	287		166	462		167	364		155	446		180	477		182	423		159	440		166
	170	389		194	388		161	459		182	342		180	344		151	280		153	352		166	276		118	277		137	271		171	483		166	380		145	486		197	523		180	405		167	484		179
	174	403		193	365		159	494		182	342		174	331		137	280		153	352		170	265		119	275		131	275		169	492		168	356		159	497		198	518		179	431		208	460		199
	178	395		192	372		167	468		185	330		169	317		137	246		152	358		160	256		119	275		135	273		171	525		166	357		159	467		203	488		167	452		194	491		210
	166	382		198	388		163	455		160	325		150	302		151	275		161	380		150	251		117	280		132	267		173	492		165	364		164	483		212	516		149	413		201	453		199
	151	369		189	385		163	455		158	317		142	285		130	261		166	369		132	256		120	269		137	260		174	470		170	365		163	506		197	522		152	426		190	447		176
	140	351		158	356		162	432		163	322		127	285		134	257		174	378		129	272		123	286		145	251		176	476		161	369		163	501		221	514		151	390		195	452		171
	133	339		159	358		172	417		167	327		119	284		142	283		181	375		124	251		127	276		145	251		176	476		161	369		155	525		221	514		150	389		203	432		160
	142	358		163	349		172	417		177	309		119	278		130	271		196	392		123	234		125	268		160	268		163	467		169	351		148	554		219	473		149	373		200	449		134
	142	358		155	340		173	408		174	330		115	245		132	250		180	385		122	237		120	236		175	277		168	441		169	367		153	537		190	489		152	386		201	422		129
	148	393		148	354		168	410		171	313		120	229		138	276		176	398		125	230		120	233		175	277		168	428		172	359		153	555		211	489		158	384		191	412		138
	157	395		168	329		168	410		161	310		116	230		126	268		155	420		126	230		117	235		173	272		164	373		169	367		172	555		202	453		186	382		193	434		120
	159	402		163	359		171	433		166	301		114	231		125	258		163	406		129	219		112	240		157	265		157	366		160	362		171	505		204	454		184	382		190	418		126
	158	369		159	336		180	447		163	303		112	225		129	293		156	419		121	212		114	225		156	242		160	357		166	377		182	501		175	407		188	371		199	417		127
	152	350		154	326		180	447		143	292		113	227		140	275		154	410		120	206		113	222		144	242		171	349		167	372		192	504		167	378		184	362		197	393		137
	150	351		164	333		188	446		147	293		111	213		135	264		172	424		117	202		106	233		135	255		173	331		167	372		190	515		167	401		203	349		191	373		137
	153	349		160	333		192	474		141	297		111	215		150	306		169	414		117	202		110	243		127	231		195	302		161	407		204	516		151	361		191	348		178	384		126
	153	349		157	325		192	474		155	299		111	224		153	292		170	408		117	192		113	240		120	223		183	299		161	419		217	513		151	361		189	356		175	361		132
	168	337		151	326		242	441		155	299		113	219		153	292		176	408		117	193		118	229		114	218		165	266		149	376		225	494		147	325		187	330		175	361		135
	169	360		161	337		226	437		151	287		108	208		159	333		158	387		114	196		116	245		112	223		161	240		142	380		202	477		133	314		190	347		146	367		133
	173	361		157	336		219	434		162	284		116	213		154	304		160	387		113	194		124	249		121	216		132	212		146	373		187	464		136	293		184	353		140	343		147
	167	349		160	306		224	405		159	302		108	208		157	308		152	389		116	195		126	246		122	224		125	185		149	390		173	404		127	272		185	339		144	362		150
	173	329		158	309		205	357		152	278		114	212		148	332		157	381		116	189		132	258		124	209		122	175		134	363		161	408		132	257		192	336		131	357		146
	162	323		162	300		217	362		148	287		108	205		148	318		149	401		114	206		128	265		120	204		119	165		144	365		154	397		127	258		196	351		131	357		146
	153	305		153	295		190	303		140	275		113	209		145	315		130	372		115	209		135	273		126	205		116	170		135	325		143	388		124	248		196	351		132	336		131
	140	334		137	283		162	270		136	304		111	210		155	339		135	346		116	219		131	293		126	205		115	172		136	300		137	357		123	247		195	337		135	300		138
	140	334		142	293		152	265		141	278		110	215		137	320		139	317		118	248		133	299		132	199		118	168		129	281		131	351		130	252		195	340		131	338		135
	130	306		132	294		152	243		135	271		111	209		147	297		133	304		118	248		142	292		116	193		112	163		125	262		122	349		128	241		203	354		128	306		132
	139	309		135	271		133	230		136	282		114	219		141	330		136	280		128	244		155	302		122	199		111	168		122	227		129	316		118	228		201	346		135	286		135
	135	323		135	271		129	234		151	280		110	225		144	317		136	254		139	269		147	298		122	199					119	225		121	307		126	229		195	351		133	306		129
	143	334		132	273		129	234		152	285		111	220		168	292		125	248		143	286		153	261		122	202					117	201		124	281		127	229		204	355		135	292		135
	138	320		131	248		129	216		142	283		115	212		157	347		119	247		139	266		142	235		115	202					116	189		123	251		123	227		208	341		131	297		135
	144	353		133	249		127	228		146	288		108	209		165	312		122	222		134	282		126	201		112	180					116	189		120	242		115	222		199	326		132	273		135
	153	344		132	242		127	228		141	275		112	221		172	301		124	217		126	295		114	176		119	202					116	189		115	222		118	222		189	316		124	233		131
	138	347		131	245		128	215		150	266		110	223		151	320		115	220		128	283		111	167		116	206					116	183		120	218		119	223		195	312		122	235		141
	154	388		130	231		126	213		171	292		116	225		142	285		110	195		131	288		109	160		117	184					114	177		119	220					183	303		122	218		135
	153	379		124	221					183	288		111	214		133	256		116	192		142	308		110	158		114	203					113	191		119	228					178	303		122	218		135
	166	392		120	218					183	288		114	203		135	283		112	178		150	304		101	153		121	195					112	179		119	213					165	283		119	208		139
	174	402		121	222					187	294		113	206		130	257		109	176		160	305		107	161		113	196								119	212					159	280		121	206		146
	169	395		116	205					182	272		111	200		126	209		109	170		151	286		106	163		116	192								113	212					147	264		119	207		164
	162	378		120	205					177	271		113	198		123	202		112	172		135	262					115	211								123	212					133	243		117	196		167
	150	337		120	206					152	235		110	205		126	183		111	168		119	192					112	186														133	232		117	196		174
	138	277		120	192					126	210		108	214		116	185					115	171					115	189														133	221		119	193		182
	131	240		112	204					127	201		117	217		118	174					115	171					117	192														128	207		121	192		191
	127	216		117	190					124	202		110	216		110	174					115	150					117	192														129	189		114	190		175
	128	206		119	180					126	187		109	212		108	164					115	150					116	198														121	197					175
	125	197								123	194		109	212		113	164					111	155					126	191														122	188					166
	123	207								122	191		110	213		107	168					110	145					126	191														113	189					154
	118	200								126	197		110	204		105	163					106	154					128	208														115	177					153
	119	190								126	197		112	203		110	162					107	138					123	223																				137
	124	190											111	189								107	150					124	230																				124
													110	202								111	145					128	238																				125
													119	201								107	145					135	261																				120
													118	197								106	147					139	241																				115
													110	199														127	260																				115
													115	209														125	279																				116
													114	204														131	244																				113
													113	200														121	236																				114
													112	205														119	252																				113
													108	208														116	225																				113
													108	204														118	183																				109
													114	206														118	181																				113
													113	203														118	181																				113
													105	205														116	176
													108	194														114	158
													113	183														108	161
													112	192														113	168
													111	195														106	164
													116	213														109	144
													110	204														106	150
													115	200														106	149
													109	195														104	144
													115	195
													117	210
													113	218
													116	207
													113	204
													118	212
													114	216
													113	217
													121	215
													117	232
													126	242
													132	262
													138	249
													130	219
													130	219
													125	240
													130	230
													134	240
													147	235
													157	256
													151	229
													157	236
													141	220
													133	200
													118	193
													119	187
													112	183
													112	177
													112	170
													111	175
													111	175
[truncated: 13 more columns]

## Sheet: Ndc80 mut AB
Each Mtw1-YFP and Dad4-CFP pair represent intensities for one pixel (60 nm)
Ndc80 mut AB
Cell #	1			2			3			4			5			6			7			8			9			10			11			12			13			14			15			16			17
	Mtw1-YFP intensity	Dad4-CFP intensity		Mtw1-YFP intensity	Dad4-CFP intensity		Mtw1-YFP intensity	Dad4-CFP intensity		Mtw1-YFP intensity	Dad4-CFP intensity		Mtw1-YFP intensity	Dad4-CFP intensity		Mtw1-YFP intensity	Dad4-CFP intensity		Mtw1-YFP intensity	Dad4-CFP intensity		Mtw1-YFP intensity	Dad4-CFP intensity		Mtw1-YFP intensity	Dad4-CFP intensity		Mtw1-YFP intensity	Dad4-CFP intensity		Mtw1-YFP intensity	Dad4-CFP intensity		Mtw1-YFP intensity	Dad4-CFP intensity		Mtw1-YFP intensity	Dad4-CFP intensity		Mtw1-YFP intensity	Dad4-CFP intensity		Mtw1-YFP intensity	Dad4-CFP intensity		Mtw1-YFP intensity	Dad4-CFP intensity		Mtw1-YFP intensity
	106	160		110	164		111	177		108	181		107	210		110	193		130	247		103	134		132	276		113	211		114	220		115	223		112	209		109	167		109	153		106	171		111
	101	160		107	164		112	172		113	174		106	194		109	186		120	228		103	134		127	272		105	215		111	215		123	232		109	217		111	165		111	162		106	177		112
	104	158		111	174		115	184		112	176		102	200		110	189		127	234		105	133		131	279		112	208		111	226		118	230		111	217		110	161		110	161		109	168		112
	105	164		116	163		114	189		109	182		109	216		111	193		124	242		104	135		123	269		120	218		113	207		124	242		111	217		106	157		105	159		106	180		112
	105	164		112	166		123	196		110	180		103	219		114	194		123	239		102	136		130	279		120	202		115	218		119	231		117	220		114	163		105	159		109	189		112
	106	161		114	165		123	196		109	177		104	213		108	195		116	250		104	137		128	274		110	211		116	221		124	235		113	229		110	168		108	156		107	178		113
	108	171		112	175		121	208		109	177		102	219		109	199		125	255		105	137		129	278		112	213		112	233		125	244		121	221		111	163		112	169		107	178		112
	107	171		114	186		131	218		108	178		107	228		105	211		123	247		105	140		134	297		112	218		115	220		130	266		117	228		108	174		108	160		110	188		112
	105	185		114	184		133	235		106	198		104	243		101	204		124	253		105	140		134	297		109	217		118	214		124	284		111	228		113	176		109	161		108	196		112
	111	181		114	187		136	245		104	193		104	245		108	210		119	250		106	140		130	324		114	234		125	210		137	333		115	259		116	192		108	168		108	197		112
	111	187		111	186		132	271		107	203		104	235		106	230		123	252		105	141		131	329		115	215		126	221		128	370		114	249		114	209		112	180		105	191		111
	111	174		114	201		132	281		109	203		108	236		112	265		127	259		107	141		128	329		114	249		125	219		131	410		114	280		123	253		110	191		111	200		111
	106	187		123	207		132	267		115	205		108	236		109	263		125	261		105	144		124	326		122	234		123	224		147	453		114	280		122	281		107	197		109	214		112
	109	180		111	204		143	296		109	200		109	252		104	287		123	270		107	148		127	328		119	250		123	214		158	475		115	254		130	279		108	210		112	228		110
	115	193		113	218		148	298		114	217		104	235		104	297		119	260		109	147		131	336		113	251		116	232		158	475		117	273		129	317		105	226		112	228		111
	116	200		117	223		138	294		107	214		106	225		103	313		120	263		110	153		133	320		120	270		117	230		177	455		115	255		141	354		108	210		108	237		112
	109	196		118	218		150	282		115	197		107	234		107	320		122	283		113	158		129	333		120	259		124	227		184	469		117	263		135	337		107	195		107	227		112
	114	213		109	211		143	286		109	206		106	218		102	323		120	284		115	158		127	321		118	279		124	234		210	475		119	263		136	301		108	206		112	240		111
	108	210		112	227		139	280		119	204		111	226		104	332		120	278		114	160		118	309		128	291		127	244		189	439		109	284		136	301		108	195		108	239		109
	107	217		116	228		137	273		127	212		102	214		104	311		126	268		114	161		125	323		121	284		121	233		191	474		112	284		128	339		104	191		112	243		109
	107	217		117	231		133	270		126	219		106	216		109	296		125	284		114	166		123	313		126	297		120	233		197	469		120	307		121	304		105	181		109	250		107
	109	238		114	246		133	270		135	231		106	219		105	287		127	283		114	170		125	321		118	295		119	244		181	465		120	307		118	295		107	185		112	232		108
	116	228		117	241		127	259		140	244		105	232		106	288		129	290		115	173		125	311		115	305		118	227		178	475		114	290		125	269		110	184		113	232		109
	113	234		115	245		126	249		142	251		108	244		109	266		123	296		115	168		125	311		116	316		128	239		178	465		117	275		124	290		106	186		108	250		108
	116	218		121	248		121	228		138	263		103	247		103	268		123	294		115	170		124	312		121	290		119	228		173	452		119	278		113	273		108	203		115	235		107
	113	209		114	249		121	237		132	288		105	249		103	254		129	301		114	176		126	306		121	319		121	237		156	446		118	299		119	250		106	194		109	254		108
	112	229		120	263		121	237		131	283		107	253		104	252		126	308		113	180		130	320		120	316		116	243		158	391		116	287		115	245		107	206		115	243		109
	108	227		115	250		117	226		125	288		107	242		105	249		124	317		112	172		126	305		124	344		120	241		154	396		120	306		124	273		109	200		113	239		106
	110	233		122	275		117	232		135	291		105	231		108	247		124	317		113	175		120	317		127	345		116	228		154	396		122	283		136	258		104	195		112	250		107
	109	228		117	281		122	224		135	291		109	238		104	245		123	324		114	176		123	300		122	358		120	234		153	348		113	292		145	250		104	196		112	238		105
	111	233		117	281		116	219		129	292		113	217		108	230		124	311		115	174		131	315		125	350		118	241		160	365		113	292		150	269		107	184		115	239		108
	109	241		119	276		122	214		140	286		104	220		103	211		120	341		114	176		123	315		125	386		123	237		156	360		114	273		156	270		107	192		111	257		108
	108	258		118	277		118	215		141	278		105	210		103	227		123	331		117	169		121	304		127	357		123	232		151	323		121	274		158	266		108	189		116	244		105
	113	240		118	283		118	215		140	266		109	212		104	219		123	331		114	169		126	309		123	359		123	237		147	370		113	264		150	267		110	201		122	249		107
	110	228		117	277		118	213		129	291		104	211		109	221		121	327		111	169		122	328		117	348		119	239		146	340		110	258		156	284		110	201		115	241		104
	121	235		116	269		112	226		124	293		108	205		107	215		124	339		111	166		126	328		116	364		117	240		138	307		120	252		166	261		109	191		121	243		104
	121	235		115	280		112	226		127	301		108	205		100	208		120	322		109	164		125	314		122	333		118	239		145	312		117	265		158	261		113	205		128	221		106
	110	246		116	268		113	204		124	292		105	195		100	208		120	292		110	166		127	338		122	333		119	250		155	325		110	261		150	249		110	208		138	242
	111	240		113	295		118	209		126	294		103	197		102	209		122	310		110	163		130	319		123	298		119	239		137	305		113	276		141	292		105	210		137	240
	112	254		120	265		114	212		135	296		107	182		100	199		117	276		110	160		130	319		125	316		118	236		136	306		113	267		140	245		105	210		137	253
	112	246		117	277		114	208		141	312		102	174		104	202		121	279		111	162		132	348		124	317		120	240		138	316		115	279		137	263		109	204		146	236
	114	262		117	251		109	224		145	317		105	172		107	192		121	261		112	157		120	331		128	295		123	251		139	291		110	286		137	248		107	224		149	243
	102	245		116	252		109	204		158	329		104	168		103	189		121	261		111	156		133	325		124	306		122	236		139	291		118	262		141	248		112	217		156	240
	114	234		113	219		110	214		157	300		104	172		105	196		123	256		112	158		119	333		133	287		117	239		140	305		110	307		143	254		108	227		156	240
	110	240		112	230		113	220		153	320		107	167		100	185		123	262		112	155		121	363					122	227		144	282		116	272		152	222		108	227		162	244
	110	240		114	218		109	205		137	304		109	173		106	169		121	258		115	155		125	359					115	227		133	274		113	298		149	218		110	234		185	241
	109	251		107	209		110	189		132	321		109	165		105	179		121	260		114	155		123	358					122	242		139	265		115	289		144	223		107	229		186	231
	112	274		114	216		113	208		130	311		107	167		103	177		121	260		112	155		131	367					122	238		132	285		115	289		143	228		113	235		190	259
	114	267		115	206		110	197		124	339		103	159		105	179		121	247		110	154		137	367					118	224		136	278		119	288		135	206		111	250		169	231
	110	257		115	206		108	201		124	339		105	166		110	165		121	252		107	153		130	378					125	221		137	276		114	290		139	218		111	250		162	247
	116	276		114	209		111	199		124	320		105	156		106	160		117	252		108	151		126	397					119	231		125	253		117	308		140	224		110	260		149	240
	110	252		119	211		111	199		124	340		107	163		106	167		119	257		107	148		132	405					116	237		131	257		110	291		129	222		108	242		149	240
	112	263		114	196		107	203		121	333		107	163		107	166					107	149		130	397					121	240		127	247		116	322		137	223		114	243		138	236
	106	286		114	205		111	201		135	332		104	156		103	161					107	149		128	378					117	244		124	244		110	321		134	244		111	247		151	239
	106	281		108	185		111	201		135	340		103	155		106	160					108	148		129	358					120	226		125	253		115	346		149	261		111	247		140	224
	110	252		108	185		109	198		142	353		105	150		106	166					107	146		129	358					119	234		131	242		122	345		154	260		114	245		152	230
	112	292		114	175		109	214		155	339		105	159		103	162					105	148		132	381					120	237		127	243		122	345		146	253		109	234		135	231
	107	291					114	196		147	359		102	147		107	152					106	147		126	367					121	237		125	250		116	368		137	276		111	248		131	241
	111	330					114	202		150	344		100	148		107	156					105	145		133	389					126	250		130	226		118	377		137	276		113	238		131	241
	106	297					107	204		146	335		101	142		102	152					105	145		131	359					118	239		124	242		115	387		134	282		113	251		132	224
	114	273					110	207		147	331		99	148		108	160					105	143		134	372					116	226		128	231		118	391		147	274		118	253		134	256
	111	261					112	207		131	358		103	150								105	143		133	346					122	242		123	231		117	425		139	291		116	240		134	240
	111	234					107	214		127	341		101	146								105	142		140	346					114	242		121	241		119	431		141	302		115	267		140	236
	109	226					110	194		119	344		104	135								106	142		131	352					120	222		120	239		118	454		141	319		109	258		133	229
	111	199					107	199		124	340											105	143		137	371					121	246		122	227		123	509		130	311		117	276		122	238
	107	189					111	205		124	340											104	143		134	386					122	233		121	232		123	509		130	333		113	267		124	242
	113	189					108	192		121	351											104	139		131	402					117	227		127	261		116	529		127	341		113	262		127	222
	108	196					111	203		117	351											104	141		134	416					122	236		122	251		121	529		130	341		111	284		133	235
	110	187					112	209		122	360											102	138		136	423					114	222		124	249		124	518		129	326		117	267		145	233
	108	185					108	219		113	352											104	139		130	436					117	231		124	249		119	507		138	325		114	269		156	241
	115	186					111	203		115	327											102	140		128	429					119	229		127	228		125	479		140	314		114	269		173	229
	113	179					114	214		112	300											103	141		128	429					117	229		120	246		115	425		132	306		115	274		176	236
	114	176					115	202		115	269											104	139		135	392					118	226		124	240		120	396		130	314		122	283		156	232
	114	183					115	202		110	245											104	139		132	372					121	233		121	237		115	377		121	351		124	290		149	232
	117	185					111	205		109	229											104	137		131	383					126	243		118	236		113	337		114	356		121	282		139	243
							115	215		110	208											103	137		135	352					118	229		120	231		119	280		120	342		121	282		128	243
							115	215		114	203											103	138		131	325					121	233		118	225		117	271		115	385		118	296		131	249
							116	229		108	200											103	134		137	368					129	246		113	231		114	272		113	382		124	297		128	235
							125	236		112	195											103	134		137	324					122	247		111	241		119	262		113	382		131	292		134	245
							122	244		107	191											103	136		132	358					129	239		123	241		117	264		114	365		133	292		132	255
							128	277		110	196											103	137		142	334					130	243		118	226		114	254		109	338		133	292		132	255
							129	259		111	184											103	135		140	324					129	244		123	232		121	261		110	298		135	286		134	255
							130	269		110	185											104	137		139	339					141	255		124	224		119	269		111	272		133	287		129	259
							135	298		109	174											103	138		138	342					132	254		124	224		123	262		111	212		136	287		122	254
							135	298		111	186											103	137		150	338					128	241		119	215		118	271		105	185		138	285		125	250
							142	301		114	181											103	138								135	247		122	227					107	171		135	316		122	257
							152	284		109	174											103	135								131	245		116	229					111	171		132	329		127	267
							150	309														104	138								128	253		119	224					107	174		128	322		127	267
							166	317														104	138								128	253		122	217					108	165		132	332		121	263
							168	295														104	138								133	265		116	223					106	165		130	312		125	269
							161	292														104	138								126	267								108	161		129	363		117	263
							165	309														103	139								139	272											121	352		117	265
							166	293														103	136								135	281											126	359		118	265
							161	329														104	140								149	280											133	338		111	266
							153	312														104	140								134	281											123	330		112	255
							138	333														104	139								160	284											123	343		112	255
							136	346														104	142								157	283											124	337		112	239
							137	353														104	141								163	283											128	359		110	251
							134	362														104	142								156	272											127	348		111	255
							134	348														102	138								160	271											127	370		117	243
							131	346														104	139								164	279											119	361		109	241
							133	347														103	141								151	291											117	344		112	237
							133	347														103	141								149	285											114	304		110	224
							142	347														103	140								148	276											115	291		107	223
							132	360														103	140								146	291											113	225		109	215
							137	366														103	139								150	297											116	222		110	199
							137	352														104	143								154	302											116	199		104	203
							130	388														103	141								141	300											108	190		109	192
							129	358														104	140								145	296											110	188		110	175
							128	349														104	141								148	307											108	178		110	175
							128	349														103	141								144	298											107	185		105	175
							126	288														103	139								145	298											108	170		109	169
							120	274														105	138								142	318														105	160
							114	233														103	139								130	316
							122	208														104	135								138	310
							118	207														103	140								131	329
							113	194														103	139								140	317
							117	176														101	138								137	333
							118	187														102	139								142	314
							115	185														103	138								134	328
							115	169														102	137								149	339
							115	168														104	138								144	321
							109	165														101	136								156	354
							117	168														103	136								155	369
							114	180														103	134								157	358
							114	180														103	133								154	365
							112	168														103	134								150	364
							109	172														102	133								149	351
																						103	132								151	364
																						102	132								149	384
																						102	130								148	413
																						101	134								145	407
																						103	134								136	396
																						104	129								137	400
																						104	129								137	409
																						103	130								125	400
																						102	131								123	405
																						102	130								126	408
																						103	132								128	385
																						102	130								122	368
																						102	129								128	385
																						101	129								121	341
																						102	129								126	361
																						102	129								119	355
																															116	357
																															120	299
																															123	280
																															117	267
																															121	258
																															113	248
																															118	240
																															117	236
																															119	235
																															113	222
																															122	224
																															118	211
																															111	242
[truncated: 3 more columns]

## Sheet: Ndc80 mut AC
Each Mtw1-YFP and Dad4-CFP pair represent intensities for one pixel (60 nm)
Ndc80 mut AC
Cell #	1			2			3			4			5			6			7			8			9			10			11			12			13			14			15			16			17
	Mtw1-YFP intensity	Dad4-CFP intensity		Mtw1-YFP intensity	Dad4-CFP intensity		Mtw1-YFP intensity	Dad4-CFP intensity		Mtw1-YFP intensity	Dad4-CFP intensity		Mtw1-YFP intensity	Dad4-CFP intensity		Mtw1-YFP intensity	Dad4-CFP intensity		Mtw1-YFP intensity	Dad4-CFP intensity		Mtw1-YFP intensity	Dad4-CFP intensity		Mtw1-YFP intensity	Dad4-CFP intensity		Mtw1-YFP intensity	Dad4-CFP intensity		Mtw1-YFP intensity	Dad4-CFP intensity		Mtw1-YFP intensity	Dad4-CFP intensity		Mtw1-YFP intensity	Dad4-CFP intensity		Mtw1-YFP intensity	Dad4-CFP intensity		Mtw1-YFP intensity	Dad4-CFP intensity		Mtw1-YFP intensity	Dad4-CFP intensity		Mtw1-YFP intensity
	130	265		133	223		125	231		116	216		113	180		117	185		129	205		109	174		113	186		112	155		110	157		109	144		114	195		108	163		108	183		108	142		105
	132	282		133	223		126	237		114	210		119	179		119	174		132	204		115	167		111	177		114	164		110	157		105	148		116	195		107	155		112	183		103	150		108
	130	256		135	238		134	241		117	219		119	183		114	190		132	209		109	159		113	186		116	175		113	168		109	142		108	185		109	156		113	171		107	153		105
	127	271		127	241		133	230		116	209		117	178		119	194		120	212		115	166		123	185		115	180		109	154		112	150		111	197		112	151		108	168		110	152		104
	129	271		135	250		131	237		118	206		112	187		119	184		127	209		109	160		122	210		120	181		109	174		109	153		115	181		113	158		109	178		109	158		106
	138	284		139	258		132	253		118	206		122	184		119	184		131	234		110	175		126	205		120	181		115	166		113	157		116	220		111	167		111	174		113	158		106
	132	283		138	249		129	251		118	214		116	186		115	187		132	264		109	168		132	220		120	190		117	169		119	169		109	196		114	160		108	184		105	159		111
	133	304		141	281		141	268		120	216		115	201		117	200		126	265		116	170		127	244		124	220		119	176		120	177		115	195		109	159		108	184		105	159		110
	130	331		144	286		132	284		118	205		117	199		122	211		133	283		116	175		129	243		126	236		120	202		132	198		109	189		106	179		109	187		109	165		110
	128	370		146	314		136	312		125	215		122	196		112	222		134	360		116	188		132	307		127	215		125	215		129	189		109	189		110	190		116	187		105	154		108
	132	452		142	357		145	363		125	209		118	200		124	239		148	429		115	191		123	306		124	231		133	240		122	194		116	197		111	197		116	187		107	152		110
	135	492		153	366		152	449		125	212		118	194		124	239		163	478		110	180		125	335		123	227		133	256		124	193		111	198		107	204		111	214		111	150		108
	128	480		149	395		156	464		118	210		115	203		123	263		190	558		116	197		117	354		119	222		124	258		125	186		114	203		107	206		110	230		108	153		108
	130	483		148	405		165	525		115	227		122	207		125	283		204	573		120	213		119	354		119	222		122	241		127	192		114	199		108	208		110	273		105	157		110
	131	461		147	398		144	561		126	221		121	218		120	288		181	550		113	216		119	365		122	226		122	241		120	192		115	219		108	210		114	272		106	160		109
	127	470		147	398		149	600		119	235		118	222		123	304		181	550		116	223		117	363		121	213		117	245		110	181		115	219		108	207		111	317		106	155		110
	135	464		156	412		149	600		119	232		121	229		123	304		176	529		112	222		120	362		127	240		124	257		113	174		117	221		111	206		113	364		109	163		107
	125	479		145	412		137	576		122	254		111	241		119	306		180	522		113	242		126	393		129	237		126	265		115	199		114	238		111	203		111	333		108	157		105
	129	450		159	422		143	594		125	253		123	239		121	294		194	551		113	238		132	356		129	217		128	283		117	192		116	258		107	193		116	378		109	167		105
	127	413		164	403		135	586		125	243		126	240		126	293		204	521		116	248		155	375		120	242		129	271		117	187		113	274		108	198		117	349		107	171		112
	125	421		163	409		141	573		127	258		125	255		131	293		205	524		116	232		166	379		132	229		139	287		118	206		113	260		108	197		109	371		109	184		109
	131	397		189	416		134	579		125	267		122	235		134	320		190	494		116	251		181	393		131	233		144	285		118	206		111	286		104	180		109	371		109	185		117
	128	394		182	426		133	593		120	265		122	235		134	320		180	491		117	250		185	407		131	233		151	276		115	214		110	286		107	191		112	359		109	213		116
	131	397		190	415		142	575		123	261		120	251		146	324		159	438		121	249		191	393		132	291		142	277		113	215		116	316		113	196		120	346		110	252		127
	130	399		183	417		147	592		126	260		122	239		146	348		159	438		114	280		169	389		138	299		144	285		111	212		113	318		115	201		120	346		110	252		130
	133	377		185	399		160	535		119	277		116	255		162	344		160	399		122	266		167	401		140	305		137	287		116	213		112	308		115	199		110	328		118	310		123
	133	373		166	379		147	522		121	284		125	248		161	356		153	344		118	264		167	401		138	327		140	273		115	224		114	340		112	208		109	308		120	332		118
	129	358		170	391		147	522		126	281		121	251		169	348		155	313		113	250		161	416		141	323		137	268		117	214		116	336		116	199		116	337		115	398		118
	120	357		170	391		140	553		126	281		121	246		156	342		147	264		113	250		150	399		148	338		133	263		120	225		117	339		105	193		110	315		123	411		120
	131	359		167	386		138	528		117	296		119	239		160	362		144	241		122	261		164	395		153	355		127	275		121	223		114	331		108	199		116	306		123	459		122
	124	346		168	373		133	499		118	309		118	254		154	352		137	224		117	269		164	388		161	343		134	242		121	223		113	337		114	197		112	312		121	524		133
	124	346		161	384		127	465		128	311		120	256		152	368		138	221		116	249		156	373		153	338		128	240		121	231		116	334		112	197		111	291		141	579		135
	127	364		174	371		141	478		121	349		121	262		157	373		142	211		113	252		144	380		159	346		117	220		124	238		116	353		115	202		114	289		141	579		121
	124	355		164	374		137	458		119	337		122	260		148	363		133	198		121	245		154	382		167	332		132	232		131	241		117	349		109	192		112	300					124
	124	343		154	372		134	434		122	383		123	263		149	375		131	200		123	255		151	364		170	336		133	239		148	266		111	370		110	190		116	268					132
	120	344		156	359		136	432		137	382		123	263		147	374		129	203		120	251		142	365		156	297		135	246		157	307		111	362		115	203		118	270					131
	126	333		148	368		132	408		124	391		121	292		155	385		125	193		119	251		142	365		151	280		147	253		151	331		115	378		114	198		113	293					136
	127	334		161	360		132	374		125	360		120	272		163	400					119	251		145	381		138	271		142	267		154	349		116	378		114	210		118	272					138
	126	357		157	367		131	357		124	376		119	276		164	409					127	240		137	343		128	245		131	250		159	362		111	381		114	210		107	257					144
	124	350		156	365		127	315		126	393		121	262		164	409					115	234		143	347		119	223		131	250		152	364		112	379		115	210		115	269					141
	131	331		171	364		122	299		125	440		119	290		151	432					116	250		135	349		123	211		132	277		157	363		110	370		115	218		114	261					135
	123	338		171	364		129	273		127	432		119	285		147	420					122	250		130	342		120	211		126	284		140	376		114	362		115	196		111	240					119
	131	326		162	340		128	260		128	469		122	277		140	417					121	241		134	342		122	208		136	295		150	362		111	357		114	205		113	245					123
	125	311		162	330		126	256		128	476		117	287		138	408					120	264		133	333		119	190		144	298		154	387		113	334		113	226		108	221					122
	124	309		155	333		128	261		122	448		118	289		137	444					117	257		137	318		114	188		149	289		145	409		115	340		118	218		112	222					133
	127	290		142	311		126	245		124	452		121	294		129	419					117	257		131	279		114	183		162	330		144	394		116	321		121	231		112	222					141
	119	288		140	325		124	233		126	485		114	295		129	419					119	271		131	279		116	179		157	346		144	433		117	312		119	227		113	212					141
	124	291		141	315		124	243		124	485		121	292		129	407					117	263		119	256		120	168		156	353		139	411		117	293		124	223								157
	122	285		142	299		120	235		119	452		112	318		131	423					114	263		117	248		111	173		152	359		140	390		118	297		124	223								150
	124	272		140	284		119	243		121	431		117	339		131	421					115	277		117	223					155	368		144	378		119	283		116	224								162
	123	272		134	271		119	243		121	431		127	336		131	395					115	240		115	211					144	367		135	390		112	321		124	233								166
	123	269		133	259		119	236		116	453		122	335		134	360					119	252		117	202					133	367		139	392					126	240								151
	124	265		130	251		121	221		128	385		120	334		130	321					116	261		111	192					131	353		131	375					130	239								149
	129	265		134	275		120	225		120	359		128	338		130	321					115	268		116	192					127	351		131	382					130	239								140
	134	275		127	261		119	220		127	321		113	351		144	314					117	260		120	184					133	368		128	379					145	254								138
	127	251		127	261		122	223		122	332		121	360		129	287					116	271		116	181					130	348		129	375					163	259								132
	119	248		133	261					120	297		125	353		132	260					118	238		117	186					134	362		121	347					173	261								142
	130	249		125	251					119	303		121	354		131	253					118	261		114	160					129	344		118	351					216	272								134
	128	258		128	261					123	302		126	388		133	231					118	252		110	160					123	301		122	311					216	272								128
	131	244		124	244					128	319		129	379		128	215					116	244		112	169					124	256		117	269					228	259								119
	125	243		124	241					123	331		119	409		128	215					118	252								119	240		114	238					195	282								120
	123	242		128	237					126	335		136	426		123	220					114	236								121	213		110	223					180	277								113
	128	245		124	240					123	337		121	437		127	202					112	243								112	200		111	200					157	290								119
	125	255		120	239					127	333		129	407		122	206					117	234								115	178		111	200					157	290								117
													125	412		123	204					120	249								111	181		115	200					152	294								115
													124	410								117	225								117	174		114	188					150	315								125
													127	408								109	243								116	157		116	184					140	291								123
													125	410								112	220								116	157		115	186					133	306								125
													123	406								112	213								114	164		113	168					133	306								124
													123	436								118	209								113	156		116	166					137	309								128
													128	424								112	219								110	162		113	160					138	312								131
													133	397								111	204								111	148		113	180					131	300								133
													122	367								111	204								111	163		112	165					145	330								149
													125	320								116	206																	145	330								155
													130	307								119	191																	136	315								153
													122	262								113	195																	140	322								153
													125	255								114	193																	137	310								134
													128	237								119	202																	136	326								125
													128	237																										136	326								117
													131	229																										125	306								117
													127	235																										128	303								109
													131	212																										133	276								114
													121	221																										123	292								109
													128	221																										118	255								108
													128	221																										119	242								104
																																								124	220								104
																																								122	212								110
																																								117	215								111
																																								118	190								109
																																								115	187								101
																																								117	179								110
																																								118	178								106
																																								112	172								101
																																								111	179								111
																																																	111
																																																	111
																																																	108
																																																	106
[truncated: 15 more columns]

## Sheet: Ndc80 mut BC
Each Mtw1-YFP and Dad4-CFP pair represent intensities for one pixel (60 nm)
Ndc80 mut BC
Cell #	1			2			3			4			5			6			7			8			9			10			11			12			13			14			15			16			17
	Mtw1-YFP intensity	Dad4-CFP intensity		Mtw1-YFP intensity	Dad4-CFP intensity		Mtw1-YFP intensity	Dad4-CFP intensity		Mtw1-YFP intensity	Dad4-CFP intensity		Mtw1-YFP intensity	Dad4-CFP intensity		Mtw1-YFP intensity	Dad4-CFP intensity		Mtw1-YFP intensity	Dad4-CFP intensity		Mtw1-YFP intensity	Dad4-CFP intensity		Mtw1-YFP intensity	Dad4-CFP intensity		Mtw1-YFP intensity	Dad4-CFP intensity		Mtw1-YFP intensity	Dad4-CFP intensity		Mtw1-YFP intensity	Dad4-CFP intensity		Mtw1-YFP intensity	Dad4-CFP intensity		Mtw1-YFP intensity	Dad4-CFP intensity		Mtw1-YFP intensity	Dad4-CFP intensity		Mtw1-YFP intensity	Dad4-CFP intensity		Mtw1-YFP intensity
	115	169		113	160		115	160		121	174		107	164		111	156		110	163		105	130		105	135		107	137		131	272		126	202		115	161		120	168		117	177		114	179		131
	115	169		116	163		112	149		123	171		108	157		108	172		107	164		106	131		105	135		106	139		135	258		120	212		115	161		121	176		118	173		115	168		129
	116	171		116	164		104	162		125	179		108	156		106	174		107	165		106	134		108	137		108	140		138	270		123	184		106	163		129	181		118	166		114	175		121
	116	170		117	162		111	159		131	183		113	175		112	169		109	153		106	133		107	138		109	147		133	265		120	204		115	160		124	188		115	172		121	181		123
	116	170		116	165		108	145		131	183		115	181		111	190		103	142		105	136		108	142		107	147		133	275		120	204		114	169		122	196		119	174		120	188		132
	119	171		117	165		106	150		136	188		125	204		117	184		104	160		107	137		107	147		109	148		129	275		125	228		110	174		123	198		120	180		119	199		126
	121	177		120	169		111	145		135	205		123	231		123	200		108	150		107	139		109	144		109	154		133	298		128	229		109	161		129	204		121	185		122	213		128
	120	178		122	169		106	147		145	201		132	264		138	232		111	148		108	143		109	150		109	157		132	287		133	258		115	166		129	204		123	217		123	203		130
	120	183		123	176		104	146		141	207		129	305		141	247		104	152		108	147		110	153		110	165		137	310		142	273		112	180		139	224		127	227		128	224		130
	121	194		123	176		109	151		142	218		133	325		154	263		109	145		110	153		110	152		110	167		136	325		148	334		112	172		141	249		124	263		127	233		142
	121	187		126	175		107	150		158	233		135	354		163	288		106	151		112	164		111	162		108	171		135	331		149	351		114	184		149	279		136	275		123	248		151
	123	201		129	181		108	141		158	233		138	348		150	324		109	153		112	168		113	170		108	171		140	326		159	396		117	191		143	286		136	319		121	276		156
	123	213		130	184		110	149		159	263		142	348		145	338		105	154		116	179		113	170		108	171		143	333		141	359		113	203		145	283		129	339		126	275		165
	121	221		125	190		112	148		140	244		142	346		145	338		107	156		116	183		116	183		109	168		142	334		152	337		125	204		136	323		132	365		133	289		168
	119	210		126	200		110	148		151	248		150	335		124	348		107	156		119	187		119	195		107	169		143	327		146	386		117	201		155	359		145	365		142	295		177
	123	224		124	216		111	141		144	249		140	313		126	328		109	158		119	187		117	191		108	167		142	312		146	357		113	237		155	359		144	382		153	331		160
	121	229		127	233		107	150		141	257		141	303		131	356		115	157		122	188		122	202		109	165		145	337		146	357		119	217		144	380		151	379		158	321		179
	120	224		127	246		109	157		137	258		142	292		134	343		113	163		122	190		125	209		108	162		161	340		144	347		116	237		151	378		158	385		151	337		168
	119	227		127	251		110	151		137	256		139	292		134	343		107	165		124	189		123	202		107	163		159	339		145	313		122	243		147	361		151	377		157	351		147
	120	241		130	262		111	152		143	254		139	281		160	336		103	182		124	188		119	201		107	162		170	380		144	332		117	239		149	366		148	402		139	336		144
	118	229		130	269		110	148		128	265		131	261		168	292		107	212		125	195		121	206		107	162		169	364		144	319		120	234		146	368		148	402		135	346		144
	119	223		134	276		109	153		130	251		129	256		175	312		108	228		124	193		120	195		106	163		169	364		144	319		117	225		145	357		139	400		142	324		141
	120	237		136	272		114	156		123	248		129	256		176	280		110	239		123	193		121	193		108	164		170	415		139	264		122	232		150	353		142	416		144	343		140
	118	230		135	277		114	152		116	227		119	242		176	280		108	255		122	193		121	190		107	167		151	454		143	277		120	228		150	353		143	367		148	333		145
	119	222		133	277		107	152		120	245		123	234		159	281		112	248		122	194		121	190		106	165		165	480		127	265		117	227		155	365		138	380		148	333		155
	117	221		129	263		111	160		115	231		116	224		169	270		105	242		126	190		119	182		106	165		165	514		122	238		124	254		151	345		139	400		159	375		158
	117	229		129	262		111	160		121	177		113	206		144	244		109	243		124	186		117	177		106	165		179	523		128	234		122	255		161	337		148	424		159	361		137
	118	214		127	263		115	149		115	176		116	203		134	219		107	224		125	178		117	177		106	162		194	519		129	209		120	261		150	332		144	397		153	390		143
	117	214		129	256		107	155		112	176		114	202		134	219		108	228		127	177		114	172		109	162		192	526		127	222		120	262		150	321		137	421		155	425		143
	118	219		127	252		111	148		111	164		110	197		122	194		112	232		125	170		114	167		108	162		206	530		120	203		120	266		150	334		152	440		161	423		136
	117	217		126	248		114	156		114	171		114	202		115	203		107	227		123	170		115	167		107	163		187	550		120	193		118	262		148	347		154	455		163	431		130
	116	213		123	229		114	145		114	171		109	181		116	192		117	221		120	165		115	173		106	163		197	533		124	190		122	254		148	347		173	474		169	455		130
	117	217		123	233		114	159		107	170		112	199		113	186		112	209		114	160		115	169		106	165		184	558		120	185		125	225		142	338		181	441		168	459		129
	117	217		122	227		117	150		112	166		113	193		113	178		116	212		114	160		114	164		108	167		198	568		122	192		123	250		137	334		213	453		168	438		127
	117	212		121	223		108	139		107	164		115	187		117	193		125	191		112	158		115	162		108	167		198	558					119	214		130	318		209	452		165	398		128
	118	210		122	212		112	143		113	159		120	197		110	191		129	198		112	155		113	160		108	170		187	554					119	225		128	335		229	465		172	364		117
	116	216		124	217		110	135					128	189		113	185		144	193		111	155		114	162		110	175		184	558					119	244		126	315		215	448		170	329		126
	116	216		121	209		109	137					130	189		112	191		145	168		112	151		112	163		110	175		181	563					120	220		121	314		196	437		177	289		131
	118	216		122	202		114	142					139	207		115	186		140	165		109	151		114	159		109	174		181	597					119	221		117	310		203	451		170	265		133
	118	216		122	201		107	138					127	204		115	198		138	165		111	151		114	159		110	179		183	576					120	217		117	310		205	446		149	230		130
	118	216		123	199		107	139					123	225		112	188		135	165		109	150		113	160		111	175		179	560					123	201		118	307		197	451		137	210		123
	120	215		122	199		110	138					121	191		114	183		135	165		108	146		114	159		112	181		169	522					121	217		118	286		180	414		143	208		126
	117	216		128	199		108	145					116	198		116	189		140	156		107	146		114	159		116	182		166	487					122	215		120	279		170	424		132	207		124
	117	211		125	198		111	144					122	206		108	191		140	144		107	149		112	159		120	173		163	422					122	215		119	273		170	424		140	198		127
	119	220		124	199		106	143					116	187		111	184		141	156		108	145		113	160		125	180		160	373					117	220		116	259		175	443		134	202		125
	120	217		121	197		105	141					116	196		114	183		139	156		109	148		112	156		123	185		158	348					126	211		113	270		159	461		133	197		128
	119	218		119	193		112	140					117	197		105	193		125	154		107	146		113	157		122	184		164	334					122	199		123	248		149	444		135	206		125
	119	218		119	193		113	149					111	206		112	189		130	145		109	144		113	159		118	183		149	314					124	203		123	248		147	424					135
	118	225		118	196		110	143					115	208		113	185		125	145		106	146		113	158		113	175		158	310					127	200		112	250		149	428					121
	117	221		119	196		108	140					118	199		114	197		117	148		108	144		114	156		113	175		138	302					120	210		115	255		150	413					133
	118	214		119	196		108	146					115	206		108	195		110	149		108	146		113	162		113	175		147	315					122	216		122	261		143	396					130
	117	220		115	192		110	144					115	206		113	197		107	150		108	143		113	159		112	174		141	306					120	226		118	260		144	338					144
	118	217		117	192		105	142					114	224		111	183		111	144		107	143		113	156		112	174		151	298					120	219		125	252		139	292					148
	116	206		118	190		111	138					115	228		111	187		113	146		107	145		112	161		112	176		145	326					124	215		118	255		140	268					148
	116	203		116	189		113	144					120	241		115	187		109	160		106	144		112	161		114	170								126	213		115	250		131	233					153
	116	205		117	186		109	143					129	228		110	194		107	143		107	144		114	158		113	174								124	210		121	233		131	206					158
	115	193		118	185		114	153					132	256		117	188		105	140		107	141		114	160		113	180								121	216		116	251		129	212					160
	115	190		117	187		112	155					141	243		113	191		105	141		108	141		115	160		115	176								126	230		115	254		142	203					161
	114	188		119	185		119	148					135	233		113	194		103	143		106	143		113	161		117	179								128	230		116	245		136	200					151
	114	184		120	186		118	160					140	246		114	180		109	141		107	143		114	161		119	185								125	229		117	238		134	193					156
	112	183		121	186		124	170					142	249		110	183		109	137		107	145		114	160		119	185								123	230		117	240		128	192					142
	114	180		121	184		133	173					145	264		112	196		107	143		107	141		113	163		123	186								124	214		123	218		128	181					141
	116	178		121	181		140	194					143	268		108	192		101	139		107	143		113	159		124	188								125	217		119	222		132	185					135
	113	174		121	179		148	232					151	267		113	200		108	142		107	141		114	162		124	184								127	223		114	219		124	197					135
	116	178		119	184		153	240					135	287		110	186		107	146		108	138		115	164		127	195								126	218		123	223		129	188					128
	114	176		118	183		154	243					139	330		110	193		106	141		106	144		116	163		126	198								133	221		120	238								125
	114	176		118	183		148	248					148	364		117	184		105	142		108	144		116	159		123	189								131	221		122	239								125
				119	187		159	319					156	381		114	189		107	139		107	142		116	165		123	202								137	220		120	249								125
				117	186		163	273					166	392		113	197		106	139		108	141		120	167		124	203								139	229		120	256								120
				117	189		168	271					165	387		114	196		112	129		107	144		120	167		125	199								129	226		115	247								123
				117	186		165	282					170	441		114	193		105	139		109	144		125	178		123	198								128	233		121	247								128
				118	185		164	279					157	457		112	195		105	134		107	142		127	183		120	204								118	245		114	251								129
				118	186		177	284					149	465		115	194		107	132		108	144		130	184		123	197								118	221		121	261								128
				120	186		161	269					145	438		112	198		103	143		107	143		133	194		122	197								127	203		121	261								128
				119	183		166	270					145	478		111	194		106	131		106	142		140	209		122	196								127	203		119	256								127
				121	184		151	246					149	517		119	199		109	137		109	143		142	213		122	196								124	209		123	242
				119	183		151	246					148	524		117	212		106	142		107	144		141	224		120	193								117	200		124	252
				120	178		148	229					149	555		116	205		102	144		107	141		138	238		116	186								119	194		125	249
				120	183		134	216					151	573		116	222		106	136		107	142		140	238		115	172								126	197		121	241
				119	183		129	218					152	604		121	220		109	135		108	142		139	241		112	173								122	199		122	267
				119	183		124	207					152	604		121	213		107	142		107	142		142	260		111	163								118	197		123	245
				116	177		120	216					137	558		119	227					108	143		141	245		108	153								116	202		122	262
				117	184		123	206					131	501		122	252					107	144		143	259		110	154								117	190		123	258
				118	183		121	194					117	409		132	243					109	142		141	264		107	149								122	205		120	256
				118	185								124	317		123	243					107	143		141	264		107	143								117	196		120	256
				118	185								119	265		134	244					109	141		136	259		106	137								121	184		120	260
				118	179								119	225		151	286					109	141		131	246		106	137								122	180		113	236
				117	185								116	216		164	320					108	143		128	228		106	137								116	189		121	232
				117	182								115	184		175	379					107	142		127	220		105	136								114	193		122	205
				117	186								110	173		175	379					108	142		121	190		105	135								122	195		126	211
				117	185								111	174		175	367					108	146		117	178		105	133								117	194		123	204
				119	183								113	175		176	397					108	143		115	167		105	133								124	185		123	195
				119	187								110	173		169	465					111	141		115	160		103	130								118	202		124	182
				119	184								107	167		168	469					109	141		112	157		102	131								118	202		121	172
				117	188								108	155		168	469					109	142		109	150		102	129								120	188		120	174
				116	194											164	468					108	139		111	149											119	193		118	178
				114	189											168	474					107	135		111	148											119	186		125	181
				113	191											157	453					106	136		109	148											115	190		118	168
				116	190											138	425					106	134														117	177		118	167
				114	187											138	425					106	134														117	196		118	167
				115	191											124	330					107	136														117	194		117	171
				113	188											128	294					105	136														119	186		114	177
				114	191											121	248					106	134														116	182
				114	191											115	194					107	134														124	180
				114	192											115	194																				125	182
				113	190											113	193																				124	190
				113	189											112	173																				117	188
				113	185											112	164																				125	197
				113	182											107	172																				130	183
				111	175											106	160																				127	196
				112	169											110	157																				140	211
				113	167																																154	218
				113	165																																154	218
				112	165																																148	210
				112	159																																149	204
				111	161																																145	207
				112	161																																134	208
				113	160																																137	198
				112	157																																127	193
				113	159																																131	196
				113	161																																136	193
				112	159																																127	195
				113	159																																132	191
				113	159																																134	208
				112	158																																135	191
																																					131	204
																																					129	208
																																					129	216
																																					135	213
																																					135	213
																																					130	217
																																					127	221
																																					129	216
																																					131	211
																																					131	231
																																					142	255
																																					148	255
																																					157	292
																																					157	296
																																					165	307
																																					155	325
																																					178	340
																																					173	334
																																					178	335
																																					175	347
																																					183	362
																																					185	362
																																					173	353
																																					175	378
																																					177	368
																																					162	369
																																					173	396
																																					172	381
																																					163	378
																																					154	363
																																					149	382
																																					147	380
																																					147	389
																																					161	388
																																					164	388
																																					162	354
																																					176	378
																																					165	361
																																					150	307
																																					141	265
																																					140	235
																																					131	213
																																					124	196
																																					124	206
																																					127	192
																																					120	194
																																					117	179
																																					124	172
																																					124	174
																																					123	182
																																					122	175
[truncated: 9 more columns]

## Sheet: Ndc80 mut ABC
Each Mtw1-YFP and Dad4-CFP pair represent intensities for one pixel (60 nm)
Ndc80 mut ABC
Cell #	1			2			3			4			5			6			7			8			9			10			11			12			13			14			15			16			17
	Mtw1-YFP intensity	Dad4-CFP intensity		Mtw1-YFP intensity	Dad4-CFP intensity		Mtw1-YFP intensity	Dad4-CFP intensity		Mtw1-YFP intensity	Dad4-CFP intensity		Mtw1-YFP intensity	Dad4-CFP intensity		Mtw1-YFP intensity	Dad4-CFP intensity		Mtw1-YFP intensity	Dad4-CFP intensity		Mtw1-YFP intensity	Dad4-CFP intensity		Mtw1-YFP intensity	Dad4-CFP intensity		Mtw1-YFP intensity	Dad4-CFP intensity		Mtw1-YFP intensity	Dad4-CFP intensity		Mtw1-YFP intensity	Dad4-CFP intensity		Mtw1-YFP intensity	Dad4-CFP intensity		Mtw1-YFP intensity	Dad4-CFP intensity		Mtw1-YFP intensity	Dad4-CFP intensity		Mtw1-YFP intensity	Dad4-CFP intensity		Mtw1-YFP intensity
	122	246		132	228		107	149		116	250		119	260		114	239		108	168		109	162		115	169		123	240		129	243		114	207		121	258		126	168		118	171		105	151		111
	127	252		137	237		107	149		116	245		115	262		115	235		108	168		112	168		121	177		119	248		124	256		119	223		114	240		117	175		118	176		103	153		114
	127	252		137	237		105	153		110	230		124	267		115	228		113	162		110	160		123	174		124	247		125	258		124	220		120	249		113	176		117	175		102	147		113
	127	265		134	258		108	153		115	239		118	274		113	241		113	163		109	158		123	178		121	246		130	277		122	215		116	245		120	190		118	170		108	154		116
	119	246		126	243		109	144		110	257		123	271		115	245		112	169		107	162		122	193		125	247		122	272		114	222		116	257		120	181		114	170		104	148		127
	129	258		135	253		109	156		117	248		123	271		114	249		108	163		111	157		121	196		126	246		125	253		114	222		116	270		125	197		113	177		105	160		139
	122	253		131	266		109	156		114	243		116	274		116	253		117	166		109	165		129	206		125	245		121	280		115	232		113	279		122	201		122	184		110	162		161
	119	256		135	254		108	149		113	261		125	272		112	253		110	167		110	161		129	206		123	245		127	282		117	232		116	292		132	243		116	183		109	163		178
	119	283		130	272		108	149		118	255		124	294		115	250		111	170		109	172		127	245		128	244		127	292		120	220		116	316		130	285		114	179		109	163		202
	123	283		135	294		104	155		119	251		115	285		110	270		110	173		113	170		140	293		126	244		128	293		122	229		115	315		134	348		113	177		108	167		195
	125	289		131	340		108	153		120	258		124	290		111	284		107	163		112	172		134	302		126	244		132	288		115	249		115	342		126	364		118	177		110	171		208
	119	289		127	353		111	154		107	254		124	300		110	298		108	174		111	176		138	315		129	257		133	300		118	238		115	354		145	416		117	187		104	181		190
	121	299		133	397		107	155		114	265		127	313		114	316		109	172		111	176		147	292		129	264		134	284		121	258		115	351		154	445		115	198		106	177		172
	126	286		131	423		110	161		112	255		131	348		116	292		110	174		113	195		143	286		129	264		130	298		117	258		118	325		156	428		117	195		110	186		140
	131	311		127	379		109	150		111	266		131	356		119	355		111	167		110	195		143	286		127	285		126	301		116	258		119	331		159	420		117	195		111	181		131
	122	292		130	435		106	154		112	267		132	334		119	348		112	171		110	187		141	270		128	279		132	306		120	259		114	360		162	433		120	220		107	188		126
	123	301		128	399		105	155		117	289		135	326		119	355		112	171		109	190		128	261		131	275		124	310		118	271		111	341		160	412		119	210		106	190		132
	119	293		128	399		105	155		112	279		142	313		115	361		111	162		113	189		126	238		129	294		125	326		117	269		117	334		152	388		114	216		107	189		121
	124	299		126	437		107	152		113	285		133	301		115	361		114	170		113	179		127	262		131	296		132	328		124	283		113	335		157	390		119	203		109	199		127
	120	297		124	412		106	153		117	277		132	295		119	365		109	170		114	175		119	254		131	285		126	327		118	256		117	326		146	353		114	235		108	202		125
	123	317		122	413		102	161		119	301		136	302		111	372		108	171		111	193		126	234		134	288		133	333		122	269		115	318		146	320		112	229		111	205		127
	122	279		126	401		108	173		114	302		140	293		126	371		113	164		117	189		126	234		136	275		139	342		120	265		109	301		130	331		119	232		109	214		118
	122	283		125	402		108	173		116	301		156	285		117	370		113	173		115	192		123	246		145	265		139	342		118	264		120	307		138	321		116	242		109	224		119
	120	279		125	383		108	154		112	295		147	285		121	377		108	164		116	205		117	227		156	271		138	339		125	266		117	327		138	321		115	246		109	224		120
	123	285		119	377		107	164		120	286		144	273		123	384		104	173		114	205		129	219		148	286		135	333		121	284		121	281		149	303		114	236		107	224		120
	126	273		125	360		107	163		113	306		141	278		121	384		108	182		121	203		124	237		144	298		141	328		119	268		116	323		137	315		117	251		108	229		129
	119	288		126	342		107	159		116	340		138	281		118	381		110	166		115	204		127	243		137	273		131	327		120	272		120	317		133	286		116	249		107	235		131
	124	277		122	355		107	159		118	315		129	281		117	366		112	163		127	220		130	262		141	258		135	322		115	284		115	312		133	265		116	222		110	226		146
	123	272		123	359		110	159		107	327		129	281		117	373		112	167		124	204		128	235		130	273		135	317		124	278		120	307		135	239		118	259		103	218		157
	124	271		121	322		104	167		115	326		128	282		114	396		111	173		118	206		126	241		133	254		152	312		123	272		122	273		131	261		118	255		108	227		158
	127	280		119	327		111	159		117	327		125	284		118	380		106	168		125	204		127	238		135	273		158	309		118	285		122	290		132	246		118	255		108	227		158
	122	285		117	302		108	173		115	329		132	278		115	360		106	168		114	204		123	263		138	275		172	313		118	285		118	279		129	246		120	286		109	219		181
	122	285		117	302		112	161		113	315		120	283		113	350		106	170		120	197		125	263		136	257		168	300		123	296		118	279		132	244		114	275		106	215		202
	113	272		121	275		107	171		113	306		120	289		118	335		112	174		112	206		128	263		136	263		144	303		124	288		116	269		129	237		115	276		108	233		204
	122	269		116	280		105	164		116	308		122	285		118	330		112	174		113	220		127	286		132	261		136	300		115	264		117	270		129	237		118	301		108	231		205
	120	299		126	282		108	173		112	305		122	288		110	337		109	172		114	205		124	289		133	247		126	293		119	267		114	267		125	225		119	293		107	249		199
	123	276		113	275		111	168		113	323		123	267		116	353		110	170		116	237		128	332		142	263		124	291		114	253		114	254		125	230		116	253		102	259		174
	121	287		125	264		108	172		113	323		117	268		120	340		110	171		113	220		128	334		148	257		125	287		117	256		116	236		137	238		117	278		105	232		161
	121	287		128	283		114	182		113	335		118	275		117	344		114	167		118	219		131	344		150	250		125	295		116	249		117	223		148	242		122	281		105	252		161
	125	277		119	259		109	188		113	323		122	292					110	176		115	219		122	346		150	263		124	290		118	226		119	236		157	276		113	278		109	246		141
	117	281		119	249		110	186		112	309		121	284					111	189		113	216		126	339		157	250		126	293		123	213		116	237		164	286		114	268		111	271		135
	116	277		121	242		113	184		112	335		116	284					106	182		120	216		126	339		150	241		123	285		114	212		111	240		171	306		113	289		108	258		124
	125	262		116	244		108	192		112	319		117	303					106	186		117	212		127	337		149	240		124	278		113	209		121	239		170	313		122	281		109	264		121
	121	262		120	261		110	184		114	333		117	284					106	184		123	230		127	365		144	248		125	295		121	212		112	240		172	316		121	275		113	268		119
	121	262		125	246		111	176		112	316		119	282					108	200		122	243		128	369		145	243		131	269		121	212		116	235		158	328		118	279		111	261		121
	125	275		126	254		111	195		111	314		121	287					112	208		119	256		127	374		136	249		126	284		117	193		115	239		157	341		118	279		109	284		123
	119	277		117	252		110	182		115	312		118	271					112	209		114	261		124	361		132	241		123	290		118	192		120	231		166	359		122	262		112	240		116
	126	261		121	257		109	198		115	326		114	282					106	216		119	255		131	392		133	247		128	290		115	191		109	223		168	330		117	282		112	269		114
	122	284		119	247		112	195		114	319		115	294					110	224		115	257		147	382		131	247		132	288		113	199		115	240		162	318		114	286		107	228		115
	126	263		118	241		113	196		113	310		117	284					110	233		117	266		141	403		134	257		119	279		111	196		115	248		149	294		122	273		109	256		114
	126	263		123	226		115	195		111	289		109	275					114	240		116	280		161	401		135	255		120	277		114	191		115	246		132	245		124	290		114	235
	122	280		120	238		111	185		109	314		112	287					109	236		117	287		154	431		129	244		120	277					115	246		125	220		120	288		114	235
	120	278		128	238		111	191		111	309		114	276					109	220		111	291		149	444		128	247		120	268					113	239		118	209		127	288		105	253
	121	277		131	229		104	184		113	297		115	283					109	220		120	302		145	464		130	252		125	283					120	232		115	191		120	293		110	249
	124	263		124	225		115	168		110	305		112	285					110	218		114	299		152	469		132	255		124	277					115	244		119	195		129	302		105	242
	124	261		123	232		114	183		112	308		116	301					109	203		117	321		156	461		125	253		119	263					119	218		121	186		130	314		107	267
	123	251		127	220		109	183		111	321		111	275								122	315		155	454		128	243		118	261					121	218		117	181		123	339		105	246
	122	269		124	230		109	183		112	312		115	300								120	335		167	465		127	233		124	255					113	216		122	179		123	325		106	244
	123	274		128	226		110	189		109	291		115	303								119	338		167	445		128	245		125	265					121	212		116	177		121	313		106	244
	119	271		125	219		117	198		115	281		116	299								122	337		155	417		128	245		125	263					112	207		116	170		122	311		105	231
	121	257		125	220		114	190		115	281		115	307								128	339		169	433		127	252		120	257					117	208		111	162		127	307		111	230
	121	270		122	230		115	196		112	300		116	295								133	328		169	433		128	248		129	265					113	200					127	307		103	215
	124	270		123	216		116	198		115	294		116	283								137	357		172	428		129	257		116	259					111	205					127	309		104	211
	122	287		126	224		115	210		115	298		113	277								142	359		164	392		132	256		120	253					112	193					129	296		105	192
	124	268					112	212		113	295		115	275								137	377		156	352		125	244		120	261					112	201					129	288		101	195
	119	261					122	204		116	290		112	262								137	385		152	316		127	270		117	278					112	201					122	289		106	193
	122	264					126	201		116	290		115	285								137	410		138	299		125	259		117	276					112	195					120	274		109	184
	124	278					139	203		114	294		118	273								127	406		131	244		131	268		131	270					111	190					127	292		108	175
	118	261					136	200		116	286		110	284								131	378		119	210		125	244		114	271					111	191					132	264		112	183
	122	258					148	203		119	284		112	285								133	377		118	186		121	252		122	285					110	191					123	267		109	179
	122	253					133	189		116	276		113	289								128	409		119	186		128	247		122	280					115	194					121	269		108	179
	120	265					129	199		115	262		114	306								126	412		111	161		129	238		115	280					108	183					121	256		110	166
	118	253					119	214		115	283		116	280								134	394		109	165		133	239		124	278					115	187					125	262
	125	256					123	200		123	264		113	289								122	379		112	166		133	239		123	249					112	184					124	263
	120	253					115	210		120	283		120	287								115	386		111	162		129	245		127	263					109	186					121	260
	120	262					122	222		125	270		116	279								118	388		118	164		126	240		121	267					114	195					131	266
	120	247					118	236		125	281		112	304								116	402		115	158		129	233		117	276					114	184					135	273
	119	238					118	253		127	295		111	301								119	405		115	158		129	237		124	265											133	265
	121	235					116	231		120	289		125	310								116	365		113	158		124	225		118	263											134	266
	120	232					117	253		120	289		116	326								117	366					122	237		119	288											135	271
	120	232					116	266		135	265		112	321								115	366					124	249		129	281											141	270
	121	223					118	275		138	286		115	340								114	344					125	240		122	275											147	261
	119	235					120	272		149	287		112	327								115	325					125	236		129	273											136	261
	122	219					120	272		147	294		116	327								114	285					123	231		124	290											145	257
	119	224					123	313		136	298		119	325								114	244					121	241		120	273											155	262
	117	224					126	312		138	317		107	302								113	212					124	245		122	285											155	262
	121	232					142	326		130	285		115	295								106	198					125	235		120	293											149	259
	118	225					157	321		138	296		112	315								112	182					125	247		125	276											147	246
	117	225					157	321		141	270		113	332								109	171					126	236		124	286											146	248
	120	216					176	316		148	282		116	339								108	169					126	227		120	298											131	242
							185	324		184	269		116	327								108	161					122	231		119	286											136	242
							193	340		199	292		117	328								108	160					121	227		121	281											131	238
							174	353		204	293		121	341								110	164					124	225		116	267											122	260
							174	353		213	285		117	338								107	165					118	228		124	279											126	244
							161	368		186	284		113	358														121	218		124	281											132	271
							160	369		157	296		118	360														117	226		118	283											130	251
							158	334		133	291		120	360																	118	277											126	232
							156	308		124	298		113	373																	126	272											126	232
							143	307		121	317		115	391																	122	269											124	238
							128	272		121	317		123	378																	122	281											123	241
							121	240		126	289		115	376																	122	281											127	228
							122	231		139	311		121	380																	126	279											126	228
							117	212		144	304		115	400																	121	284											129	212
							116	204		137	316		120	378																	121	272											117	208
							116	204		138	310		118	387																	119	272
							117	196		138	310		118	378																	120	262
							114	183		137	304		115	384																	125	263
							115	178		142	319		124	359																	126	268
							117	171		152	353		113	343																	120	275
										143	339		111	297																	128	278
										138	342		113	265																	115	272
										128	315		116	260																	127	266
										130	326		115	255																	118	268
										125	337		113	240																	119	272
										124	332		113	227																	121	282
										124	326		113	227																	119	259
										119	325		117	238																	123	274
										119	325		113	241																	126	285
										117	311		113	242																	120	277
										123	327		117	243																	115	276
										119	314																				125	278
										120	322																				125	278
										121	326																				120	274
										121	326																				119	280
										116	317																				121	282
										116	327																				120	285
										118	314																				123	279
										121	307																				119	279
										117	315																				119	279
										117	315																				117	296
										116	318																				116	299
										117	304																				124	296
										117	278																				118	324
										108	291																				124	331
										108	291																				121	327
										114	288																				118	370
										116	287																				122	348
										113	283																				123	372
										115	262																				119	369
										119	250																				122	382
										119	250																				128	408
										117	249																				120	371
										110	260																				128	378
										119	244																				122	395
																															122	405
																															126	397
																															123	355
																															118	338
																															123	306
																															129	281
																															122	276
																															123	259
																															120	260
																															119	259
																															123	263
																															128	251
																															121	253
																															123	243
																															123	243
																															130	257
																															121	235
																															123	237
[truncated: 11 more columns]
